# Supplementary material for: miRNA Expression Patterns in Early- and Late-Stage Prostate Cancer Patients: High-Throughput Analysis
Source: Biomedicines. 2023 Nov 16;11(11):3073. doi: 10.3390/biomedicines11113073 (PMC10669269; doi:10.3390/biomedicines11113073)
Supplement: Supplementary file 1 [file biomedicines-11-03073-s001.zip]

Archive with 8 entries (8 files):
- File S1_Prostate cancer pathway's target genes.xlsx
- File S2_enrichment.KEGG.tsv
- File S3_enrichment.WikiPathways.tsv
- File S4.csv
- File S5.csv
- File S6_results_LPCa.xlsx
- File S7_results_LPCa LAPCa.xlsx
- File S8.pdf
