# Supplementary material for: miRNA Expression Patterns in Early- and Late-Stage Prostate Cancer Patients: High-Throughput Analysis
Source: Biomedicines. 2023 Nov 16;11(11):3073. doi: 10.3390/biomedicines11113073 (PMC10669269; doi:10.3390/biomedicines11113073)
Supplement: Supplementary file 1 [file biomedicines-11-03073-s001.zip › File S1_Prostate cancer pathway's target genes.xlsx]

## Sheet: Лист1
Enrichment FDR,"nGenes","Pathway Genes","Fold Enrichment","Pathway","URL","Genes"
8.90553045507987e-68,29,97,227.176632302405,"Prostate cancer","http://www.genome.jp/kegg-bin/show_pathway?hsa05215 "," PIK3CB FGFR2 HSP90AA1 GSK3B MAPK1 EP300 IKBKB CCND1 CDKN1B E2F3 SOS1 CREB1 PIK3CA CDK2 KRAS MDM2 EGF IGF1R EGFR ZEB1 TCF7L2 FOXO1 TCF7L1 CTNNB1 BCL2 CCNE2 CREB3L2 PDGFA ETV5"
9.49973787422242e-35,25,530,35.8427672955975,"Pathways in cancer","http://www.genome.jp/kegg-bin/show_pathway?hsa05200 "," PIK3CB FGFR2 HSP90AA1 GSK3B MAPK1 EP300 IKBKB CCND1 CDKN1B E2F3 SOS1 PIK3CA CDK2 KRAS MDM2 EGF IGF1R EGFR TCF7L2 FOXO1 TCF7L1 CTNNB1 BCL2 CCNE2 PDGFA"
5.72784995774851e-33,22,331,50.5047331319235,"Human papillomavirus infection","http://www.genome.jp/kegg-bin/show_pathway?hsa05165 "," PIK3CB GSK3B MAPK1 EP300 IKBKB CCND1 CDKN1B SOS1 CREB1 PIK3CA CDK2 KRAS MDM2 EGF CREB5 EGFR TCF7L2 FOXO1 TCF7L1 CTNNB1 CCNE2 CREB3L2"
1.95913766828396e-32,22,354,47.223352165725,"PI3K-Akt signaling pathway","http://www.genome.jp/kegg-bin/show_pathway?hsa04151 "," PIK3CB FGFR2 HSP90AA1 GSK3B MAPK1 IKBKB CCND1 CDKN1B SOS1 CREB1 PIK3CA CDK2 KRAS MDM2 EGF IGF1R CREB5 EGFR BCL2 CCNE2 CREB3L2 PDGFA"
4.20154020598173e-31,18,148,92.4162162162162,"Gastric cancer","http://www.genome.jp/kegg-bin/show_pathway?hsa05226 "," PIK3CB FGFR2 GSK3B MAPK1 CCND1 CDKN1B E2F3 SOS1 PIK3CA CDK2 KRAS EGF EGFR TCF7L2 TCF7L1 CTNNB1 BCL2 CCNE2"
7.15089774696011e-26,16,161,75.5146997929607,"MicroRNAs in cancer","http://www.genome.jp/kegg-bin/show_pathway?hsa05206 "," PIK3CB MAPK1 EP300 IKBKB CCND1 CDKN1B E2F3 SOS1 PIK3CA KRAS MDM2 EGFR ZEB1 BCL2 CCNE2 PDGFA"
3.99158834294727e-25,15,131,87.0076335877863,"FoxO signaling pathway","http://www.genome.jp/kegg-bin/show_pathway?hsa04068 "," PIK3CB MAPK1 EP300 IKBKB CCND1 CDKN1B SOS1 PIK3CA CDK2 KRAS MDM2 EGF IGF1R EGFR FOXO1"
3.10310504006461e-23,13,86,114.863565891473,"Colorectal cancer","http://www.genome.jp/kegg-bin/show_pathway?hsa05210 "," PIK3CB GSK3B MAPK1 CCND1 SOS1 PIK3CA KRAS EGF EGFR TCF7L2 TCF7L1 CTNNB1 BCL2"
3.6389976398391e-23,12,58,157.213793103448,"Endometrial cancer","http://www.genome.jp/kegg-bin/show_pathway?hsa05213 "," PIK3CB GSK3B MAPK1 CCND1 SOS1 PIK3CA KRAS EGF EGFR TCF7L2 TCF7L1 CTNNB1"
2.73282414385172e-22,14,147,72.368253968254,"Breast cancer","http://www.genome.jp/kegg-bin/show_pathway?hsa05224 "," PIK3CB GSK3B MAPK1 CCND1 E2F3 SOS1 PIK3CA KRAS EGF IGF1R EGFR TCF7L2 TCF7L1 CTNNB1"
8.53858934329865e-22,14,161,66.0753623188406,"Hepatitis B","http://www.genome.jp/kegg-bin/show_pathway?hsa05161 "," PIK3CB MAPK1 EP300 IKBKB E2F3 SOS1 CREB1 PIK3CA CDK2 KRAS CREB5 BCL2 CCNE2 CREB3L2"
8.53858934329865e-22,12,75,121.578666666667,"Glioma","http://www.genome.jp/kegg-bin/show_pathway?hsa05214 "," PIK3CB MAPK1 CCND1 E2F3 SOS1 PIK3CA KRAS MDM2 EGF IGF1R EGFR PDGFA"
9.02485686102145e-22,15,224,50.8839285714286,"Human cytomegalovirus infection","http://www.genome.jp/kegg-bin/show_pathway?hsa05163 "," PIK3CB GSK3B MAPK1 IKBKB CCND1 E2F3 SOS1 CREB1 PIK3CA KRAS MDM2 CREB5 EGFR CTNNB1 CREB3L2"
1.32286681855201e-21,12,79,115.422784810127,"EGFR tyrosine kinase inhibitor resistance","http://www.genome.jp/kegg-bin/show_pathway?hsa01521 "," PIK3CB FGFR2 GSK3B MAPK1 SOS1 PIK3CA KRAS EGF IGF1R EGFR BCL2 PDGFA"
1.30249438925871e-20,12,95,95.9831578947368,"Endocrine resistance","http://www.genome.jp/kegg-bin/show_pathway?hsa01522 "," PIK3CB MAPK1 CCND1 CDKN1B E2F3 SOS1 PIK3CA KRAS MDM2 IGF1R EGFR BCL2"
5.7582591858575e-20,13,157,62.9188959660297,"Hepatitis C","http://www.genome.jp/kegg-bin/show_pathway?hsa05160 "," PIK3CB GSK3B MAPK1 IKBKB CCND1 E2F3 SOS1 PIK3CA CDK2 KRAS EGF EGFR CTNNB1"
7.72765973248672e-20,11,72,116.090740740741,"Melanoma","http://www.genome.jp/kegg-bin/show_pathway?hsa05218 "," PIK3CB MAPK1 CCND1 E2F3 PIK3CA KRAS MDM2 EGF IGF1R EGFR PDGFA"
1.17046020119137e-19,13,167,59.1512974051896,"Hepatocellular carcinoma","http://www.genome.jp/kegg-bin/show_pathway?hsa05225 "," PIK3CB GSK3B MAPK1 CCND1 E2F3 SOS1 PIK3CA KRAS IGF1R EGFR TCF7L2 TCF7L1 CTNNB1"
8.17371667907256e-19,13,194,50.9189003436426,"Kaposi sarcoma-associated herpesvirus infection","http://www.genome.jp/kegg-bin/show_pathway?hsa05167 "," PIK3CB GSK3B MAPK1 EP300 IKBKB CCND1 E2F3 CREB1 PIK3CA KRAS TCF7L2 TCF7L1 CTNNB1"
9.52029846532594e-19,13,197,50.1434856175973,"Chemical carcinogenesis","http://www.genome.jp/kegg-bin/show_pathway?hsa05207 "," PIK3CB HSP90AA1 MAPK1 CCND1 SOS1 CREB1 PIK3CA KRAS EGF CREB5 EGFR BCL2 CREB3L2"
1.3500028704681e-18,13,203,48.6614121510673,"Viral carcinogenesis","http://www.genome.jp/kegg-bin/show_pathway?hsa05203 "," PIK3CB MAPK1 EP300 CCND1 CDKN1B CREB1 PIK3CA CDK2 KRAS MDM2 CREB5 CCNE2 CREB3L2"
4.02784932284077e-18,12,155,58.8283870967742,"Cushing syndrome","http://www.genome.jp/kegg-bin/show_pathway?hsa04934 "," GSK3B MAPK1 CCND1 CDKN1B E2F3 CREB1 EGFR TCF7L2 TCF7L1 CTNNB1 CCNE2 CREB3L2"
4.02784932284077e-18,13,222,44.4966966966967,"Human T-cell leukemia virus 1 infection","http://www.genome.jp/kegg-bin/show_pathway?hsa05166 "," PIK3CB MAPK1 EP300 IKBKB CCND1 E2F3 CREB1 PIK3CA CDK2 KRAS CREB5 CCNE2 CREB3L2"
1.95771735842419e-17,10,76,99.9824561403509,"Chronic myeloid leukemia","http://www.genome.jp/kegg-bin/show_pathway?hsa05220 "," PIK3CB MAPK1 IKBKB CCND1 CDKN1B E2F3 SOS1 PIK3CA KRAS MDM2"
8.08566012831035e-17,12,200,45.592,"Focal adhesion","http://www.genome.jp/kegg-bin/show_pathway?hsa04510 "," PIK3CB GSK3B MAPK1 CCND1 SOS1 PIK3CA EGF IGF1R EGFR CTNNB1 BCL2 PDGFA"
8.82405097455295e-16,9,67,102.071641791045,"Acute myeloid leukemia","http://www.genome.jp/kegg-bin/show_pathway?hsa05221 "," PIK3CB MAPK1 IKBKB CCND1 SOS1 PIK3CA KRAS TCF7L2 TCF7L1"
1.6844337142655e-15,9,72,94.9833333333333,"Non-small cell lung cancer","http://www.genome.jp/kegg-bin/show_pathway?hsa05223 "," PIK3CB MAPK1 CCND1 E2F3 SOS1 PIK3CA KRAS EGF EGFR"
2.14557631463551e-15,10,121,62.7988980716253,"Thyroid hormone signaling pathway","http://www.genome.jp/kegg-bin/show_pathway?hsa04919 "," PIK3CB GSK3B MAPK1 EP300 CCND1 PIK3CA KRAS MDM2 FOXO1 CTNNB1"
2.61633094641284e-15,9,76,89.9842105263158,"Pancreatic cancer","http://www.genome.jp/kegg-bin/show_pathway?hsa05212 "," PIK3CB MAPK1 IKBKB CCND1 E2F3 PIK3CA KRAS EGF EGFR"
6.49196305347679e-15,9,84,81.4142857142857,"ErbB signaling pathway","http://www.genome.jp/kegg-bin/show_pathway?hsa04012 "," PIK3CB GSK3B MAPK1 CDKN1B SOS1 PIK3CA KRAS EGF EGFR"
7.46950182109443e-15,10,138,55.0628019323671,"Estrogen signaling pathway","http://www.genome.jp/kegg-bin/show_pathway?hsa04915 "," PIK3CB HSP90AA1 MAPK1 SOS1 CREB1 PIK3CA KRAS EGFR BCL2 CREB3L2"
1.42674171085687e-14,9,92,74.3347826086956,"Small cell lung cancer","http://www.genome.jp/kegg-bin/show_pathway?hsa05222 "," PIK3CB IKBKB CCND1 CDKN1B E2F3 PIK3CA CDK2 BCL2 CCNE2"
2.29167143633566e-14,11,231,36.184126984127,"Ras signaling pathway","http://www.genome.jp/kegg-bin/show_pathway?hsa04014 "," PIK3CB FGFR2 MAPK1 IKBKB SOS1 PIK3CA KRAS EGF IGF1R EGFR PDGFA"
2.37927168329886e-14,10,156,48.7094017094017,"Cellular senescence","http://www.genome.jp/kegg-bin/show_pathway?hsa04218 "," PIK3CB MAPK1 CCND1 E2F3 PIK3CA CDK2 KRAS MDM2 FOXO1 CCNE2"
3.11225254064327e-14,9,101,67.7108910891089,"Melanogenesis","http://www.genome.jp/kegg-bin/show_pathway?hsa04916 "," GSK3B MAPK1 EP300 CREB1 KRAS TCF7L2 TCF7L1 CTNNB1 CREB3L2"
6.1363494045137e-14,9,109,62.7412844036697,"HIF-1 signaling pathway","http://www.genome.jp/kegg-bin/show_pathway?hsa04066 "," PIK3CB MAPK1 EP300 CDKN1B PIK3CA EGF IGF1R EGFR BCL2"
1.34328761551298e-13,9,119,57.4689075630252,"Growth hormone synthesis, secretion and action","http://www.genome.jp/kegg-bin/show_pathway?hsa04935 "," PIK3CB GSK3B MAPK1 EP300 SOS1 CREB1 PIK3CA KRAS CREB3L2"
2.83587269402456e-13,10,202,37.6171617161716,"Epstein-Barr virus infection","http://www.genome.jp/kegg-bin/show_pathway?hsa05169 "," PIK3CB IKBKB CCND1 CDKN1B E2F3 PIK3CA CDK2 MDM2 BCL2 CCNE2"
2.83587269402456e-13,10,202,37.6171617161716,"Proteoglycans in cancer","http://www.genome.jp/kegg-bin/show_pathway?hsa05205 "," PIK3CB MAPK1 CCND1 SOS1 PIK3CA KRAS MDM2 IGF1R EGFR CTNNB1"
3.15174085225602e-13,7,41,129.733333333333,"Bladder cancer","http://www.genome.jp/kegg-bin/show_pathway?hsa05219 "," MAPK1 CCND1 E2F3 KRAS MDM2 EGF EGFR"
3.98710916792576e-13,10,210,36.184126984127,"Rap1 signaling pathway","http://www.genome.jp/kegg-bin/show_pathway?hsa04015 "," PIK3CB FGFR2 MAPK1 PIK3CA KRAS EGF IGF1R EGFR CTNNB1 PDGFA"
4.93038550871231e-13,9,139,49.2,"Measles","http://www.genome.jp/kegg-bin/show_pathway?hsa05162 "," PIK3CB GSK3B IKBKB CCND1 CDKN1B PIK3CA CDK2 BCL2 CCNE2"
8.93482886890481e-13,8,89,68.3026217228464,"Longevity regulating pathway","http://www.genome.jp/kegg-bin/show_pathway?hsa04211 "," PIK3CB CREB1 PIK3CA KRAS IGF1R CREB5 FOXO1 CREB3L2"
1.88768906362551e-12,9,162,42.2148148148148,"JAK-STAT signaling pathway","http://www.genome.jp/kegg-bin/show_pathway?hsa04630 "," PIK3CB EP300 CCND1 SOS1 PIK3CA EGF EGFR BCL2 PDGFA"
1.88768906362551e-12,8,98,62.0299319727891,"Choline metabolism in cancer","http://www.genome.jp/kegg-bin/show_pathway?hsa05231 "," PIK3CB MAPK1 SOS1 PIK3CA KRAS EGF EGFR PDGFA"
2.17993465933465e-12,8,100,60.7893333333333,"AGE-RAGE signaling pathway in diabetic complications","http://www.genome.jp/kegg-bin/show_pathway?hsa04933 "," PIK3CB MAPK1 CCND1 CDKN1B PIK3CA KRAS FOXO1 BCL2"
4.00837756395492e-12,8,108,56.2864197530864,"Insulin resistance","http://www.genome.jp/kegg-bin/show_pathway?hsa04931 "," PIK3CB GSK3B IKBKB CREB1 PIK3CA CREB5 FOXO1 CREB3L2"
8.66141174870202e-12,8,119,51.0834733893557,"Neurotrophin signaling pathway","http://www.genome.jp/kegg-bin/show_pathway?hsa04722 "," PIK3CB GSK3B MAPK1 IKBKB SOS1 PIK3CA KRAS BCL2"
1.33714256961327e-11,7,70,75.9866666666667,"Prolactin signaling pathway","http://www.genome.jp/kegg-bin/show_pathway?hsa04917 "," PIK3CB GSK3B MAPK1 CCND1 SOS1 PIK3CA KRAS"
1.4524388863411e-11,7,71,74.9164319248826,"Adherens junction","http://www.genome.jp/kegg-bin/show_pathway?hsa04520 "," MAPK1 EP300 IGF1R EGFR TCF7L2 TCF7L1 CTNNB1"
1.57078764939823e-11,8,129,47.1235142118863,"Relaxin signaling pathway","http://www.genome.jp/kegg-bin/show_pathway?hsa04926 "," PIK3CB MAPK1 SOS1 CREB1 PIK3CA KRAS EGFR CREB3L2"
2.2631304400035e-11,9,217,31.5152073732719,"Regulation of actin cytoskeleton","http://www.genome.jp/kegg-bin/show_pathway?hsa04810 "," PIK3CB FGFR2 MAPK1 SOS1 PIK3CA KRAS EGF EGFR PDGFA"
2.34048567006615e-11,6,37,123.221621621622,"Thyroid cancer","http://www.genome.jp/kegg-bin/show_pathway?hsa05216 "," MAPK1 CCND1 KRAS TCF7L2 TCF7L1 CTNNB1"
2.41583961625051e-11,8,137,44.3717761557178,"Insulin signaling pathway","http://www.genome.jp/kegg-bin/show_pathway?hsa04910 "," PIK3CB GSK3B MAPK1 IKBKB SOS1 PIK3CA KRAS FOXO1"
3.35459616482017e-11,8,143,42.5100233100233,"Signaling pathways regulating pluripotency of stem cells","http://www.genome.jp/kegg-bin/show_pathway?hsa04550 "," PIK3CB FGFR2 GSK3B MAPK1 PIK3CA KRAS IGF1R CTNNB1"
3.36087325720989e-11,7,81,65.6674897119342,"B cell receptor signaling pathway","http://www.genome.jp/kegg-bin/show_pathway?hsa04662 "," PIK3CB GSK3B MAPK1 IKBKB SOS1 PIK3CA KRAS"
4.27206148226922e-11,8,148,41.0738738738739,"Phospholipase D signaling pathway","http://www.genome.jp/kegg-bin/show_pathway?hsa04072 "," PIK3CB MAPK1 SOS1 PIK3CA KRAS EGF EGFR PDGFA"
5.78390921677426e-11,8,154,39.4735930735931,"MTOR signaling pathway","http://www.genome.jp/kegg-bin/show_pathway?hsa04150 "," PIK3CB GSK3B MAPK1 IKBKB SOS1 PIK3CA KRAS IGF1R"
6.14219771411325e-11,9,246,27.8,"Shigellosis","http://www.genome.jp/kegg-bin/show_pathway?hsa05131 "," PIK3CB GSK3B MAPK1 IKBKB PIK3CA MDM2 EGFR FOXO1 BCL2"
6.17188504669454e-11,7,89,59.7647940074906,"PD-L1 expression and PD-1 checkpoint pathway in cancer","http://www.genome.jp/kegg-bin/show_pathway?hsa05235 "," PIK3CB MAPK1 IKBKB PIK3CA KRAS EGF EGFR"
6.62092463654416e-11,9,249,27.4650602409639,"Salmonella infection","http://www.genome.jp/kegg-bin/show_pathway?hsa05132 "," PIK3CB HSP90AA1 MAPK1 IKBKB PIK3CA TCF7L2 TCF7L1 CTNNB1 BCL2"
1.37415779781139e-10,7,100,53.1906666666667,"Progesterone-mediated oocyte maturation","http://www.genome.jp/kegg-bin/show_pathway?hsa04914 "," PIK3CB HSP90AA1 MAPK1 PIK3CA CDK2 KRAS IGF1R"
1.66943704160372e-10,7,103,51.6414239482201,"T cell receptor signaling pathway","http://www.genome.jp/kegg-bin/show_pathway?hsa04660 "," PIK3CB GSK3B MAPK1 IKBKB SOS1 PIK3CA KRAS"
2.77247408684429e-10,9,294,23.2612244897959,"MAPK signaling pathway","http://www.genome.jp/kegg-bin/show_pathway?hsa04010 "," FGFR2 MAPK1 IKBKB SOS1 KRAS EGF IGF1R EGFR PDGFA"
3.12611589483188e-10,7,113,47.0713864306785,"Cholinergic synapse","http://www.genome.jp/kegg-bin/show_pathway?hsa04725 "," PIK3CB MAPK1 CREB1 PIK3CA KRAS BCL2 CREB3L2"
4.712940332588e-10,7,120,44.3255555555556,"AMPK signaling pathway","http://www.genome.jp/kegg-bin/show_pathway?hsa04152 "," PIK3CB CCND1 CREB1 PIK3CA IGF1R FOXO1 CREB3L2"
6.55434554482494e-10,7,126,42.2148148148148,"Cell cycle","http://www.genome.jp/kegg-bin/show_pathway?hsa04110 "," GSK3B EP300 CCND1 CDKN1B E2F3 MDM2 CCNE2"
6.86401938337017e-10,8,214,28.406230529595,"Lipid and atherosclerosis","http://www.genome.jp/kegg-bin/show_pathway?hsa05417 "," PIK3CB HSP90AA1 GSK3B MAPK1 IKBKB PIK3CA KRAS BCL2"
8.23019820222349e-10,6,68,67.0470588235294,"Renal cell carcinoma","http://www.genome.jp/kegg-bin/show_pathway?hsa05211 "," PIK3CB MAPK1 EP300 SOS1 PIK3CA KRAS"
9.56406023454955e-10,6,70,65.1314285714286,"Central carbon metabolism in cancer","http://www.genome.jp/kegg-bin/show_pathway?hsa05230 "," PIK3CB FGFR2 MAPK1 PIK3CA KRAS EGFR"
1.1580356895132e-09,7,138,38.543961352657,"Fluid shear stress and atherosclerosis","http://www.genome.jp/kegg-bin/show_pathway?hsa05418 "," PIK3CB HSP90AA1 IKBKB PIK3CA CTNNB1 BCL2 PDGFA"
1.32864297729416e-09,7,141,37.7238770685579,"Alcoholic liver disease","http://www.genome.jp/kegg-bin/show_pathway?hsa04936 "," GSK3B IKBKB CCND1 TCF7L2 FOXO1 TCF7L1 CTNNB1"
3.73153950327012e-09,6,88,51.8090909090909,"Gap junction","http://www.genome.jp/kegg-bin/show_pathway?hsa04540 "," MAPK1 SOS1 KRAS EGF EGFR PDGFA"
1.01606883996582e-08,6,104,43.8384615384615,"C-type lectin receptor signaling pathway","http://www.genome.jp/kegg-bin/show_pathway?hsa04625 "," PIK3CB MAPK1 IKBKB PIK3CA KRAS MDM2"
1.06354517550524e-08,7,191,27.8485165794066,"Chemokine signaling pathway","http://www.genome.jp/kegg-bin/show_pathway?hsa04062 "," PIK3CB GSK3B MAPK1 IKBKB SOS1 PIK3CA KRAS"
1.08848603974387e-08,7,192,27.7034722222222,"Transcriptional misregulation in cancer","http://www.genome.jp/kegg-bin/show_pathway?hsa05202 "," CDKN1B MDM2 IGF1R ZEB1 FOXO1 PDGFA ETV5"
1.09638700401379e-08,6,106,43.011320754717,"Parathyroid hormone synthesis, secretion and action","http://www.genome.jp/kegg-bin/show_pathway?hsa04928 "," MAPK1 CREB1 CREB5 EGFR BCL2 CREB3L2"
1.50992021904169e-08,6,112,40.7071428571429,"TNF signaling pathway","http://www.genome.jp/kegg-bin/show_pathway?hsa04668 "," PIK3CB MAPK1 IKBKB CREB1 PIK3CA CREB3L2"
4.52862416564436e-08,6,135,33.7718518518519,"Apoptosis","http://www.genome.jp/kegg-bin/show_pathway?hsa04210 "," PIK3CB MAPK1 IKBKB PIK3CA KRAS BCL2"
5.80363422482076e-08,6,141,32.3347517730496,"Autophagy","http://www.genome.jp/kegg-bin/show_pathway?hsa04140 "," PIK3CB MAPK1 PIK3CA KRAS IGF1R BCL2"
5.930826651649e-08,5,68,55.8725490196078,"Fc epsilon RI signaling pathway","http://www.genome.jp/kegg-bin/show_pathway?hsa04664 "," PIK3CB MAPK1 SOS1 PIK3CA KRAS"
8.40555863658119e-08,5,73,52.0456621004566,"Platinum drug resistance","http://www.genome.jp/kegg-bin/show_pathway?hsa01524 "," PIK3CB MAPK1 PIK3CA MDM2 BCL2"
1.08679599488015e-07,7,272,19.5553921568627,"Prion disease","http://www.genome.jp/kegg-bin/show_pathway?hsa05020 "," PIK3CB GSK3B MAPK1 CREB1 PIK3CA CREB5 CREB3L2"
1.4643560196802e-07,6,166,27.4650602409639,"Wnt signaling pathway","http://www.genome.jp/kegg-bin/show_pathway?hsa04310 "," GSK3B EP300 CCND1 TCF7L2 TCF7L1 CTNNB1"
2.93268281254536e-07,6,187,24.3807486631016,"Alcoholism","http://www.genome.jp/kegg-bin/show_pathway?hsa05034 "," MAPK1 SOS1 CREB1 KRAS CREB5 CREB3L2"
3.19349158843866e-07,4,37,82.1477477477478,"Aldosterone-regulated sodium reabsorption","http://www.genome.jp/kegg-bin/show_pathway?hsa04960 "," PIK3CB MAPK1 PIK3CA KRAS"
5.68191106002964e-07,6,210,21.7104761904762,"Human immunodeficiency virus 1 infection","http://www.genome.jp/kegg-bin/show_pathway?hsa05170 "," PIK3CB MAPK1 IKBKB PIK3CA KRAS BCL2"
7.19025202927477e-07,6,219,20.8182648401826,"CAMP signaling pathway","http://www.genome.jp/kegg-bin/show_pathway?hsa04024 "," PIK3CB MAPK1 EP300 CREB1 PIK3CA CREB3L2"
7.56796140071727e-07,4,46,66.0753623188406,"Type II diabetes mellitus","http://www.genome.jp/kegg-bin/show_pathway?hsa04930 "," PIK3CB MAPK1 IKBKB PIK3CA"
8.94704348635237e-07,5,119,31.9271708683473,"Sphingolipid signaling pathway","http://www.genome.jp/kegg-bin/show_pathway?hsa04071 "," PIK3CB MAPK1 PIK3CA KRAS BCL2"
1.01022750688304e-06,7,383,13.8879025239339,"Alzheimer disease","http://www.genome.jp/kegg-bin/show_pathway?hsa05010 "," PIK3CB GSK3B MAPK1 IKBKB PIK3CA KRAS CTNNB1"
1.16346212757664e-06,5,126,30.1534391534392,"Osteoclast differentiation","http://www.genome.jp/kegg-bin/show_pathway?hsa04380 "," PIK3CB MAPK1 IKBKB CREB1 PIK3CA"
1.34436060879362e-06,5,130,29.225641025641,"Natural killer cell mediated cytotoxicity","http://www.genome.jp/kegg-bin/show_pathway?hsa04650 "," PIK3CB MAPK1 SOS1 PIK3CA KRAS"
1.72510850345717e-06,5,137,27.7323600973236,"Yersinia infection","http://www.genome.jp/kegg-bin/show_pathway?hsa05135 "," PIK3CB GSK3B MAPK1 IKBKB PIK3CA"
1.95679656970518e-06,4,59,51.516384180791,"VEGF signaling pathway","http://www.genome.jp/kegg-bin/show_pathway?hsa04370 "," PIK3CB MAPK1 PIK3CA KRAS"
2.52566568631046e-06,4,63,48.2455026455026,"Basal cell carcinoma","http://www.genome.jp/kegg-bin/show_pathway?hsa05217 "," GSK3B TCF7L2 TCF7L1 CTNNB1"
2.66439735257398e-06,4,64,47.4916666666667,"GnRH secretion","http://www.genome.jp/kegg-bin/show_pathway?hsa04929 "," PIK3CB MAPK1 PIK3CA KRAS"
3.24451893670401e-06,5,157,24.1995753715499,"Hippo signaling pathway","http://www.genome.jp/kegg-bin/show_pathway?hsa04390 "," GSK3B CCND1 TCF7L2 TCF7L1 CTNNB1"
4.43725385021231e-06,4,73,41.6365296803653,"P53 signaling pathway","http://www.genome.jp/kegg-bin/show_pathway?hsa04115 "," CCND1 MDM2 BCL2 CCNE2"
4.83915487663575e-06,5,171,22.2183235867446,"Influenza A","http://www.genome.jp/kegg-bin/show_pathway?hsa05164 "," PIK3CB MAPK1 EP300 IKBKB PIK3CA"
6.32984816232056e-06,5,181,20.9907918968692,"Axon guidance","http://www.genome.jp/kegg-bin/show_pathway?hsa04360 "," PIK3CB GSK3B MAPK1 PIK3CA KRAS"
1.12424286292363e-05,4,93,32.6824372759857,"IL-17 signaling pathway","http://www.genome.jp/kegg-bin/show_pathway?hsa04657 "," HSP90AA1 GSK3B MAPK1 IKBKB"
1.12424286292363e-05,4,93,32.6824372759857,"GnRH signaling pathway","http://www.genome.jp/kegg-bin/show_pathway?hsa04912 "," MAPK1 SOS1 KRAS EGFR"
1.54596619821405e-05,4,101,30.0937293729373,"Chagas disease","http://www.genome.jp/kegg-bin/show_pathway?hsa05142 "," PIK3CB MAPK1 IKBKB PIK3CA"
1.65540907594158e-05,4,103,29.5093851132686,"Toll-like receptor signaling pathway","http://www.genome.jp/kegg-bin/show_pathway?hsa04620 "," PIK3CB MAPK1 IKBKB PIK3CA"
1.90736200110575e-05,4,107,28.406230529595,"Glucagon signaling pathway","http://www.genome.jp/kegg-bin/show_pathway?hsa04922 "," EP300 CREB1 FOXO1 CREB3L2"
1.98124924810775e-05,5,232,16.3764367816092,"Thermogenesis","http://www.genome.jp/kegg-bin/show_pathway?hsa04714 "," SOS1 CREB1 KRAS CREB5 CREB3L2"
1.98124924810775e-05,5,232,16.3764367816092,"Coronavirus disease","http://www.genome.jp/kegg-bin/show_pathway?hsa05171 "," PIK3CB MAPK1 IKBKB PIK3CA EGFR"
3.88038057965472e-05,4,129,23.5617571059432,"Oocyte meiosis","http://www.genome.jp/kegg-bin/show_pathway?hsa04114 "," MAPK1 CDK2 IGF1R CCNE2"
6.94284745144926e-05,4,150,20.2631111111111,"Adrenergic signaling in cardiomyocytes","http://www.genome.jp/kegg-bin/show_pathway?hsa04261 "," MAPK1 CREB1 BCL2 CREB3L2"
7.62549071214602e-05,4,154,19.7367965367965,"Oxytocin signaling pathway","http://www.genome.jp/kegg-bin/show_pathway?hsa04921 "," MAPK1 CCND1 KRAS EGFR"
7.7517501079844e-05,4,155,19.6094623655914,"Non-alcoholic fatty liver disease","http://www.genome.jp/kegg-bin/show_pathway?hsa04932 "," PIK3CB GSK3B IKBKB PIK3CA"
8.51296405456195e-05,3,56,40.7071428571429,"Hedgehog signaling pathway","http://www.genome.jp/kegg-bin/show_pathway?hsa04340 "," GSK3B CCND1 BCL2"
0.000103816279961768,3,60,37.9933333333333,"Long-term depression","http://www.genome.jp/kegg-bin/show_pathway?hsa04730 "," MAPK1 KRAS IGF1R"
0.000132122772838155,4,179,16.980260707635,"Tuberculosis","http://www.genome.jp/kegg-bin/show_pathway?hsa05152 "," MAPK1 EP300 CREB1 BCL2"
0.000133858215299321,4,180,16.8859259259259,"NOD-like receptor signaling pathway","http://www.genome.jp/kegg-bin/show_pathway?hsa04621 "," HSP90AA1 MAPK1 IKBKB BCL2"
0.000140792416704294,3,67,34.0238805970149,"Long-term potentiation","http://www.genome.jp/kegg-bin/show_pathway?hsa04720 "," MAPK1 EP300 KRAS"
0.000195409562568895,3,75,30.3946666666667,"Thyroid hormone synthesis","http://www.genome.jp/kegg-bin/show_pathway?hsa04918 "," CREB1 CREB5 CREB3L2"
0.00020784823240348,3,77,29.6051948051948,"Bacterial invasion of epithelial cells","http://www.genome.jp/kegg-bin/show_pathway?hsa05100 "," PIK3CB PIK3CA CTNNB1"
0.00020784823240348,3,77,29.6051948051948,"Arrhythmogenic right ventricular cardiomyopathy","http://www.genome.jp/kegg-bin/show_pathway?hsa05412 "," TCF7L2 TCF7L1 CTNNB1"
0.000286130920940275,3,86,26.506976744186,"Insulin secretion","http://www.genome.jp/kegg-bin/show_pathway?hsa04911 "," CREB1 CREB5 CREB3L2"
0.000384364583959903,4,240,12.6644444444444,"Calcium signaling pathway","http://www.genome.jp/kegg-bin/show_pathway?hsa04020 "," FGFR2 EGF EGFR PDGFA"
0.000401691861315057,3,97,23.501030927835,"Fc gamma R-mediated phagocytosis","http://www.genome.jp/kegg-bin/show_pathway?hsa04666 "," PIK3CB MAPK1 PIK3CA"
0.000455322248066035,4,252,12.0613756613757,"Endocytosis","http://www.genome.jp/kegg-bin/show_pathway?hsa04144 "," FGFR2 MDM2 IGF1R EGFR"
0.000505095266991542,5,475,7.99859649122807,"Pathways of neurodegeneration","http://www.genome.jp/kegg-bin/show_pathway?hsa05022 "," GSK3B MAPK1 KRAS CTNNB1 BCL2"
0.000537903475160109,3,108,21.1074074074074,"Th17 cell differentiation","http://www.genome.jp/kegg-bin/show_pathway?hsa04659 "," HSP90AA1 MAPK1 IKBKB"
0.000593751883891361,3,112,20.3535714285714,"Toxoplasmosis","http://www.genome.jp/kegg-bin/show_pathway?hsa05145 "," MAPK1 IKBKB BCL2"
0.000620510452995468,3,114,19.9964912280702,"Leukocyte transendothelial migration","http://www.genome.jp/kegg-bin/show_pathway?hsa04670 "," PIK3CB PIK3CA CTNNB1"
0.000787150259719697,3,124,18.3838709677419,"Platelet activation","http://www.genome.jp/kegg-bin/show_pathway?hsa04611 "," PIK3CB MAPK1 PIK3CA"
0.000903329262031023,4,306,9.93289760348584,"Huntington disease","http://www.genome.jp/kegg-bin/show_pathway?hsa05016 "," EP300 CREB1 CREB5 CREB3L2"
0.000930038501953792,3,132,17.269696969697,"Dopaminergic synapse","http://www.genome.jp/kegg-bin/show_pathway?hsa04728 "," GSK3B CREB1 CREB3L2"
0.00105024215326464,3,138,16.5188405797101,"Apelin signaling pathway","http://www.genome.jp/kegg-bin/show_pathway?hsa04371 "," MAPK1 CCND1 KRAS"
0.00177660407747557,3,166,13.7325301204819,"CGMP-PKG signaling pathway","http://www.genome.jp/kegg-bin/show_pathway?hsa04022 "," MAPK1 CREB1 CREB3L2"
0.00202545919554128,2,44,34.5393939393939,"Vasopressin-regulated water reabsorption","http://www.genome.jp/kegg-bin/show_pathway?hsa04962 "," CREB1 CREB3L2"
0.00229198734076619,2,47,32.3347517730496,"Carbohydrate digestion and absorption","http://www.genome.jp/kegg-bin/show_pathway?hsa04973 "," PIK3CB PIK3CA"
0.00247130298785871,2,49,31.0149659863946,"Cocaine addiction","http://www.genome.jp/kegg-bin/show_pathway?hsa05030 "," CREB1 CREB3L2"
0.00253877739474128,3,190,11.9978947368421,"Neutrophil extracellular trap formation","http://www.genome.jp/kegg-bin/show_pathway?hsa04613 "," PIK3CB MAPK1 PIK3CA"
0.00304220678559607,3,203,11.2295566502463,"Diabetic cardiomyopathy","http://www.genome.jp/kegg-bin/show_pathway?hsa05415 "," PIK3CB GSK3B PIK3CA"
0.0031493252291246,2,56,27.1380952380952,"Regulation of lipolysis in adipocytes","http://www.genome.jp/kegg-bin/show_pathway?hsa04923 "," PIK3CB PIK3CA"
0.0041927769911707,2,65,23.3805128205128,"Cortisol synthesis and secretion","http://www.genome.jp/kegg-bin/show_pathway?hsa04927 "," CREB1 CREB3L2"
0.00468060521667512,2,69,22.0251207729469,"Amphetamine addiction","http://www.genome.jp/kegg-bin/show_pathway?hsa05031 "," CREB1 CREB3L2"
0.00477568626124143,2,70,21.7104761904762,"Epithelial cell signaling in Helicobacter pylori infection","http://www.genome.jp/kegg-bin/show_pathway?hsa05120 "," IKBKB EGFR"
0.00477568626124143,4,495,6.1403367003367,"Herpes simplex virus 1 infection","http://www.genome.jp/kegg-bin/show_pathway?hsa05168 "," PIK3CB IKBKB PIK3CA BCL2"
0.00511877716589925,2,73,20.8182648401826,"Inositol phosphate metabolism","http://www.genome.jp/kegg-bin/show_pathway?hsa00562 "," PIK3CB PIK3CA"
0.00578577961132443,2,78,19.4837606837607,"Antigen processing and presentation","http://www.genome.jp/kegg-bin/show_pathway?hsa04612 "," HSP90AA1 CREB1"
0.00791971003973442,2,92,16.5188405797101,"Th1 and Th2 cell differentiation","http://www.genome.jp/kegg-bin/show_pathway?hsa04658 "," MAPK1 IKBKB"
0.00803290728681575,2,93,16.3412186379928,"TGF-beta signaling pathway","http://www.genome.jp/kegg-bin/show_pathway?hsa04350 "," MAPK1 EP300"
0.00859885062386007,2,97,15.66735395189,"Phosphatidylinositol signaling system","http://www.genome.jp/kegg-bin/show_pathway?hsa04070 "," PIK3CB PIK3CA"
0.00859885062386007,2,97,15.66735395189,"Circadian entrainment","http://www.genome.jp/kegg-bin/show_pathway?hsa04713 "," MAPK1 CREB1"
0.00865620160226534,2,98,15.5074829931973,"Inflammatory mediator regulation of TRP channels","http://www.genome.jp/kegg-bin/show_pathway?hsa04750 "," PIK3CB PIK3CA"
0.00865620160226534,2,98,15.5074829931973,"Aldosterone synthesis and secretion","http://www.genome.jp/kegg-bin/show_pathway?hsa04925 "," CREB1 CREB3L2"
0.00928984486358731,2,102,14.8993464052288,"Amoebiasis","http://www.genome.jp/kegg-bin/show_pathway?hsa05146 "," PIK3CB PIK3CA"
0.00958164297318662,2,104,14.6128205128205,"NF-kappa B signaling pathway","http://www.genome.jp/kegg-bin/show_pathway?hsa04064 "," IKBKB BCL2"
0.0109772229197519,2,112,13.5690476190476,"Serotonergic synapse","http://www.genome.jp/kegg-bin/show_pathway?hsa04726 "," MAPK1 KRAS"
0.0171437107176122,2,142,10.7023474178404,"Spinocerebellar ataxia","http://www.genome.jp/kegg-bin/show_pathway?hsa05017 "," PIK3CB PIK3CA"
0.0210819039358588,2,159,9.558071278826,"Necroptosis","http://www.genome.jp/kegg-bin/show_pathway?hsa04217 "," HSP90AA1 BCL2"
0.0234852370843728,2,169,8.99250493096647,"Protein processing in endoplasmic reticulum","http://www.genome.jp/kegg-bin/show_pathway?hsa04141 "," HSP90AA1 BCL2"
0.0310288756589588,2,197,7.71438240270728,"Pathogenic Escherichia coli infection","http://www.genome.jp/kegg-bin/show_pathway?hsa05130 "," MAPK1 IKBKB"
0.0444747465530268,1,31,24.5118279569892,"Antifolate resistance","http://www.genome.jp/kegg-bin/show_pathway?hsa01523 "," IKBKB"
0.0444747465530268,1,31,24.5118279569892,"Circadian rhythm","http://www.genome.jp/kegg-bin/show_pathway?hsa04710 "," CREB1"
0.0713684558318348,1,51,14.8993464052288,"Ovarian steroidogenesis","http://www.genome.jp/kegg-bin/show_pathway?hsa04913 "," IGF1R"
0.0816505296725238,1,59,12.8790960451977,"Notch signaling pathway","http://www.genome.jp/kegg-bin/show_pathway?hsa04330 "," EP300"
0.0824822883697899,1,60,12.6644444444444,"Viral myocarditis","http://www.genome.jp/kegg-bin/show_pathway?hsa05416 "," CCND1"
0.0859254318582818,1,63,12.0613756613757,"Cytosolic DNA-sensing pathway","http://www.genome.jp/kegg-bin/show_pathway?hsa04623 "," IKBKB"
0.0926449221415581,1,69,11.0125603864734,"Adipocytokine signaling pathway","http://www.genome.jp/kegg-bin/show_pathway?hsa04920 "," IKBKB"
0.0926449221415581,1,69,11.0125603864734,"Renin secretion","http://www.genome.jp/kegg-bin/show_pathway?hsa04924 "," CREB1"
0.0933760424465675,1,70,10.8552380952381,"RIG-I-like receptor signaling pathway","http://www.genome.jp/kegg-bin/show_pathway?hsa04622 "," IKBKB"
0.0953623849699831,1,72,10.5537037037037,"Mitophagy","http://www.genome.jp/kegg-bin/show_pathway?hsa04137 "," KRAS"
0.0992470407963158,1,76,9.99824561403509,"Pertussis","http://www.genome.jp/kegg-bin/show_pathway?hsa05133 "," MAPK1"
0.0992470407963158,1,76,9.99824561403509,"Leishmaniasis","http://www.genome.jp/kegg-bin/show_pathway?hsa05140 "," MAPK1"
0.14453912082821,1,114,6.66549707602339,"Glutamatergic synapse","http://www.genome.jp/kegg-bin/show_pathway?hsa04724 "," MAPK1"
0.166837845507193,1,134,5.67064676616915,"Vascular smooth muscle contraction","http://www.genome.jp/kegg-bin/show_pathway?hsa04270 "," MAPK1"
0.173799463690103,1,141,5.38912529550827,"Ubiquitin mediated proteolysis","http://www.genome.jp/kegg-bin/show_pathway?hsa04120 "," MDM2"
0.180612216434032,1,148,5.13423423423423,"Retrograde endocannabinoid signaling","http://www.genome.jp/kegg-bin/show_pathway?hsa04723 "," MAPK1"
