# Supplementary material for: miRNA Expression Patterns in Early- and Late-Stage Prostate Cancer Patients: High-Throughput Analysis
Source: Biomedicines. 2023 Nov 16;11(11):3073. doi: 10.3390/biomedicines11113073 (PMC10669269; doi:10.3390/biomedicines11113073)
Supplement: Supplementary file 1 [file biomedicines-11-03073-s001.zip › File S2_enrichment.KEGG.tsv]

#term ID	term description	observed gene count	background gene count	strength	false discovery rate	matching proteins in your network (IDs)	matching proteins in your network (labels)
hsa05215	Prostate cancer	31	96	2.3	2.91e-66	9606.ENSP00000215832,9606.ENSP00000227507,9606.ENSP00000228872,9606.ENSP00000256078,9606.ENSP00000258149,9606.ENSP00000262904,9606.ENSP00000263253,9606.ENSP00000263826,9606.ENSP00000263967,9606.ENSP00000265171,9606.ENSP00000266970,9606.ENSP00000268035,9606.ENSP00000275493,9606.ENSP00000282111,9606.ENSP00000289153,9606.ENSP00000306894,9606.ENSP00000324806,9606.ENSP00000329140,9606.ENSP00000335153,…	MAPK1,CCND1,CDKN1B,KRAS,MDM2,E2F3,EP300,AKT3,PIK3CA,EGF,CDK2,IGF1R,EGFR,TCF7L1,PIK3CB,ETV5,GSK3B,CREB3L2,HSP90AA1,CTNNB1,PDGFA,CREB5,ZEB1,PTEN,FOXO1,BCL2,CREB1,SOS1,FGFR2,CCNE2,IKBKB
hsa05200	Pathways in cancer	26	517	1.49	2.32e-33	9606.ENSP00000215832,9606.ENSP00000227507,9606.ENSP00000228872,9606.ENSP00000256078,9606.ENSP00000258149,9606.ENSP00000262904,9606.ENSP00000263253,9606.ENSP00000263826,9606.ENSP00000263967,9606.ENSP00000265171,9606.ENSP00000266970,9606.ENSP00000268035,9606.ENSP00000275493,9606.ENSP00000282111,9606.ENSP00000289153,9606.ENSP00000324806,9606.ENSP00000335153,9606.ENSP00000344456,9606.ENSP00000346508,…	MAPK1,CCND1,CDKN1B,KRAS,MDM2,E2F3,EP300,AKT3,PIK3CA,EGF,CDK2,IGF1R,EGFR,TCF7L1,PIK3CB,GSK3B,HSP90AA1,CTNNB1,PDGFA,PTEN,FOXO1,BCL2,SOS1,FGFR2,CCNE2,IKBKB
hsa04151	PI3K-Akt signaling pathway	24	350	1.62	2.66e-33	9606.ENSP00000215832,9606.ENSP00000227507,9606.ENSP00000228872,9606.ENSP00000256078,9606.ENSP00000258149,9606.ENSP00000263826,9606.ENSP00000263967,9606.ENSP00000265171,9606.ENSP00000266970,9606.ENSP00000268035,9606.ENSP00000275493,9606.ENSP00000289153,9606.ENSP00000324806,9606.ENSP00000329140,9606.ENSP00000335153,9606.ENSP00000346508,9606.ENSP00000350359,9606.ENSP00000361021,9606.ENSP00000381185,…	MAPK1,CCND1,CDKN1B,KRAS,MDM2,AKT3,PIK3CA,EGF,CDK2,IGF1R,EGFR,PIK3CB,GSK3B,CREB3L2,HSP90AA1,PDGFA,CREB5,PTEN,BCL2,CREB1,SOS1,FGFR2,CCNE2,IKBKB
hsa05165	Human papillomavirus infection	23	325	1.64	5.34e-32	9606.ENSP00000215832,9606.ENSP00000227507,9606.ENSP00000228872,9606.ENSP00000256078,9606.ENSP00000258149,9606.ENSP00000263253,9606.ENSP00000263826,9606.ENSP00000263967,9606.ENSP00000265171,9606.ENSP00000266970,9606.ENSP00000275493,9606.ENSP00000282111,9606.ENSP00000289153,9606.ENSP00000324806,9606.ENSP00000329140,9606.ENSP00000344456,9606.ENSP00000350359,9606.ENSP00000361021,9606.ENSP00000368880,…	MAPK1,CCND1,CDKN1B,KRAS,MDM2,EP300,AKT3,PIK3CA,EGF,CDK2,EGFR,TCF7L1,PIK3CB,GSK3B,CREB3L2,CTNNB1,CREB5,PTEN,FOXO1,CREB1,SOS1,CCNE2,IKBKB
hsa05226	Gastric cancer	18	144	1.88	3.53e-28	9606.ENSP00000215832,9606.ENSP00000227507,9606.ENSP00000228872,9606.ENSP00000256078,9606.ENSP00000262904,9606.ENSP00000263826,9606.ENSP00000263967,9606.ENSP00000265171,9606.ENSP00000266970,9606.ENSP00000275493,9606.ENSP00000282111,9606.ENSP00000289153,9606.ENSP00000324806,9606.ENSP00000344456,9606.ENSP00000381185,9606.ENSP00000387784,9606.ENSP00000410294,9606.ENSP00000429089	MAPK1,CCND1,CDKN1B,KRAS,E2F3,AKT3,PIK3CA,EGF,CDK2,EGFR,TCF7L1,PIK3CB,GSK3B,CTNNB1,BCL2,SOS1,FGFR2,CCNE2
hsa04068	FoxO signaling pathway	17	127	1.91	5.77e-27	9606.ENSP00000215832,9606.ENSP00000227507,9606.ENSP00000228872,9606.ENSP00000256078,9606.ENSP00000258149,9606.ENSP00000263253,9606.ENSP00000263826,9606.ENSP00000263967,9606.ENSP00000265171,9606.ENSP00000266970,9606.ENSP00000268035,9606.ENSP00000275493,9606.ENSP00000289153,9606.ENSP00000361021,9606.ENSP00000368880,9606.ENSP00000387784,9606.ENSP00000430684	MAPK1,CCND1,CDKN1B,KRAS,MDM2,EP300,AKT3,PIK3CA,EGF,CDK2,IGF1R,EGFR,PIK3CB,PTEN,FOXO1,SOS1,IKBKB
hsa05206	MicroRNAs in cancer	17	160	1.81	1.95e-25	9606.ENSP00000215832,9606.ENSP00000227507,9606.ENSP00000228872,9606.ENSP00000256078,9606.ENSP00000258149,9606.ENSP00000262904,9606.ENSP00000263253,9606.ENSP00000263967,9606.ENSP00000275493,9606.ENSP00000289153,9606.ENSP00000346508,9606.ENSP00000354487,9606.ENSP00000361021,9606.ENSP00000381185,9606.ENSP00000387784,9606.ENSP00000429089,9606.ENSP00000430684	MAPK1,CCND1,CDKN1B,KRAS,MDM2,E2F3,EP300,PIK3CA,EGFR,PIK3CB,PDGFA,ZEB1,PTEN,BCL2,SOS1,CCNE2,IKBKB
hsa05214	Glioma	14	72	2.08	6.00e-24	9606.ENSP00000215832,9606.ENSP00000227507,9606.ENSP00000256078,9606.ENSP00000258149,9606.ENSP00000262904,9606.ENSP00000263826,9606.ENSP00000263967,9606.ENSP00000265171,9606.ENSP00000268035,9606.ENSP00000275493,9606.ENSP00000289153,9606.ENSP00000346508,9606.ENSP00000361021,9606.ENSP00000387784	MAPK1,CCND1,KRAS,MDM2,E2F3,AKT3,PIK3CA,EGF,IGF1R,EGFR,PIK3CB,PDGFA,PTEN,SOS1
hsa01521	EGFR tyrosine kinase inhibitor resistance	14	78	2.04	1.47e-23	9606.ENSP00000215832,9606.ENSP00000256078,9606.ENSP00000263826,9606.ENSP00000263967,9606.ENSP00000265171,9606.ENSP00000268035,9606.ENSP00000275493,9606.ENSP00000289153,9606.ENSP00000324806,9606.ENSP00000346508,9606.ENSP00000361021,9606.ENSP00000381185,9606.ENSP00000387784,9606.ENSP00000410294	MAPK1,KRAS,AKT3,PIK3CA,EGF,IGF1R,EGFR,PIK3CB,GSK3B,PDGFA,PTEN,BCL2,SOS1,FGFR2
hsa05213	Endometrial cancer	13	57	2.14	5.23e-23	9606.ENSP00000215832,9606.ENSP00000227507,9606.ENSP00000256078,9606.ENSP00000263826,9606.ENSP00000263967,9606.ENSP00000265171,9606.ENSP00000275493,9606.ENSP00000282111,9606.ENSP00000289153,9606.ENSP00000324806,9606.ENSP00000344456,9606.ENSP00000361021,9606.ENSP00000387784	MAPK1,CCND1,KRAS,AKT3,PIK3CA,EGF,EGFR,TCF7L1,PIK3CB,GSK3B,CTNNB1,PTEN,SOS1
hsa05224	Breast cancer	15	145	1.8	3.74e-22	9606.ENSP00000215832,9606.ENSP00000227507,9606.ENSP00000256078,9606.ENSP00000262904,9606.ENSP00000263826,9606.ENSP00000263967,9606.ENSP00000265171,9606.ENSP00000268035,9606.ENSP00000275493,9606.ENSP00000282111,9606.ENSP00000289153,9606.ENSP00000324806,9606.ENSP00000344456,9606.ENSP00000361021,9606.ENSP00000387784	MAPK1,CCND1,KRAS,E2F3,AKT3,PIK3CA,EGF,IGF1R,EGFR,TCF7L1,PIK3CB,GSK3B,CTNNB1,PTEN,SOS1
hsa05218	Melanoma	13	72	2.04	6.69e-22	9606.ENSP00000215832,9606.ENSP00000227507,9606.ENSP00000256078,9606.ENSP00000258149,9606.ENSP00000262904,9606.ENSP00000263826,9606.ENSP00000263967,9606.ENSP00000265171,9606.ENSP00000268035,9606.ENSP00000275493,9606.ENSP00000289153,9606.ENSP00000346508,9606.ENSP00000361021	MAPK1,CCND1,KRAS,MDM2,E2F3,AKT3,PIK3CA,EGF,IGF1R,EGFR,PIK3CB,PDGFA,PTEN
hsa05161	Hepatitis B	15	159	1.76	1.16e-21	9606.ENSP00000215832,9606.ENSP00000256078,9606.ENSP00000262904,9606.ENSP00000263253,9606.ENSP00000263826,9606.ENSP00000263967,9606.ENSP00000266970,9606.ENSP00000289153,9606.ENSP00000329140,9606.ENSP00000350359,9606.ENSP00000381185,9606.ENSP00000387699,9606.ENSP00000387784,9606.ENSP00000429089,9606.ENSP00000430684	MAPK1,KRAS,E2F3,EP300,AKT3,PIK3CA,CDK2,PIK3CB,CREB3L2,CREB5,BCL2,CREB1,SOS1,CCNE2,IKBKB
hsa05163	Human cytomegalovirus infection	16	218	1.65	1.24e-21	9606.ENSP00000215832,9606.ENSP00000227507,9606.ENSP00000256078,9606.ENSP00000258149,9606.ENSP00000262904,9606.ENSP00000263826,9606.ENSP00000263967,9606.ENSP00000275493,9606.ENSP00000289153,9606.ENSP00000324806,9606.ENSP00000329140,9606.ENSP00000344456,9606.ENSP00000350359,9606.ENSP00000387699,9606.ENSP00000387784,9606.ENSP00000430684	MAPK1,CCND1,KRAS,MDM2,E2F3,AKT3,PIK3CA,EGFR,PIK3CB,GSK3B,CREB3L2,CTNNB1,CREB5,CREB1,SOS1,IKBKB
hsa05210	Colorectal cancer	13	82	1.99	2.51e-21	9606.ENSP00000215832,9606.ENSP00000227507,9606.ENSP00000256078,9606.ENSP00000263826,9606.ENSP00000263967,9606.ENSP00000265171,9606.ENSP00000275493,9606.ENSP00000282111,9606.ENSP00000289153,9606.ENSP00000324806,9606.ENSP00000344456,9606.ENSP00000381185,9606.ENSP00000387784	MAPK1,CCND1,KRAS,AKT3,PIK3CA,EGF,EGFR,TCF7L1,PIK3CB,GSK3B,CTNNB1,BCL2,SOS1
hsa01522	Endocrine resistance	13	95	1.92	1.37e-20	9606.ENSP00000215832,9606.ENSP00000227507,9606.ENSP00000228872,9606.ENSP00000256078,9606.ENSP00000258149,9606.ENSP00000262904,9606.ENSP00000263826,9606.ENSP00000263967,9606.ENSP00000268035,9606.ENSP00000275493,9606.ENSP00000289153,9606.ENSP00000381185,9606.ENSP00000387784	MAPK1,CCND1,CDKN1B,KRAS,MDM2,E2F3,AKT3,PIK3CA,IGF1R,EGFR,PIK3CB,BCL2,SOS1
hsa05166	Human T-cell leukemia virus 1 infection	15	211	1.64	4.99e-20	9606.ENSP00000215832,9606.ENSP00000227507,9606.ENSP00000256078,9606.ENSP00000262904,9606.ENSP00000263253,9606.ENSP00000263826,9606.ENSP00000263967,9606.ENSP00000266970,9606.ENSP00000289153,9606.ENSP00000329140,9606.ENSP00000350359,9606.ENSP00000361021,9606.ENSP00000387699,9606.ENSP00000429089,9606.ENSP00000430684	MAPK1,CCND1,KRAS,E2F3,EP300,AKT3,PIK3CA,CDK2,PIK3CB,CREB3L2,CREB5,PTEN,CREB1,CCNE2,IKBKB
hsa05160	Hepatitis C	14	156	1.74	6.09e-20	9606.ENSP00000215832,9606.ENSP00000227507,9606.ENSP00000256078,9606.ENSP00000262904,9606.ENSP00000263826,9606.ENSP00000263967,9606.ENSP00000265171,9606.ENSP00000266970,9606.ENSP00000275493,9606.ENSP00000289153,9606.ENSP00000324806,9606.ENSP00000344456,9606.ENSP00000387784,9606.ENSP00000430684	MAPK1,CCND1,KRAS,E2F3,AKT3,PIK3CA,EGF,CDK2,EGFR,PIK3CB,GSK3B,CTNNB1,SOS1,IKBKB
hsa05225	Hepatocellular carcinoma	14	160	1.73	8.07e-20	9606.ENSP00000215832,9606.ENSP00000227507,9606.ENSP00000256078,9606.ENSP00000262904,9606.ENSP00000263826,9606.ENSP00000263967,9606.ENSP00000268035,9606.ENSP00000275493,9606.ENSP00000282111,9606.ENSP00000289153,9606.ENSP00000324806,9606.ENSP00000344456,9606.ENSP00000361021,9606.ENSP00000387784	MAPK1,CCND1,KRAS,E2F3,AKT3,PIK3CA,IGF1R,EGFR,TCF7L1,PIK3CB,GSK3B,CTNNB1,PTEN,SOS1
hsa04510	Focal adhesion	14	198	1.64	1.30e-18	9606.ENSP00000215832,9606.ENSP00000227507,9606.ENSP00000263826,9606.ENSP00000263967,9606.ENSP00000265171,9606.ENSP00000268035,9606.ENSP00000275493,9606.ENSP00000289153,9606.ENSP00000324806,9606.ENSP00000344456,9606.ENSP00000346508,9606.ENSP00000361021,9606.ENSP00000381185,9606.ENSP00000387784	MAPK1,CCND1,AKT3,PIK3CA,EGF,IGF1R,EGFR,PIK3CB,GSK3B,CTNNB1,PDGFA,PTEN,BCL2,SOS1
hsa04934	Cushing syndrome	13	153	1.72	3.47e-18	9606.ENSP00000215832,9606.ENSP00000227507,9606.ENSP00000228872,9606.ENSP00000262904,9606.ENSP00000266970,9606.ENSP00000275493,9606.ENSP00000282111,9606.ENSP00000324806,9606.ENSP00000329140,9606.ENSP00000344456,9606.ENSP00000350359,9606.ENSP00000387699,9606.ENSP00000429089	MAPK1,CCND1,CDKN1B,E2F3,CDK2,EGFR,TCF7L1,GSK3B,CREB3L2,CTNNB1,CREB5,CREB1,CCNE2
hsa05220	Chronic myeloid leukemia	11	75	1.95	1.09e-17	9606.ENSP00000215832,9606.ENSP00000227507,9606.ENSP00000228872,9606.ENSP00000256078,9606.ENSP00000258149,9606.ENSP00000262904,9606.ENSP00000263826,9606.ENSP00000263967,9606.ENSP00000289153,9606.ENSP00000387784,9606.ENSP00000430684	MAPK1,CCND1,CDKN1B,KRAS,MDM2,E2F3,AKT3,PIK3CA,PIK3CB,SOS1,IKBKB
hsa05203	Viral carcinogenesis	13	182	1.64	2.69e-17	9606.ENSP00000215832,9606.ENSP00000227507,9606.ENSP00000228872,9606.ENSP00000256078,9606.ENSP00000258149,9606.ENSP00000263253,9606.ENSP00000263967,9606.ENSP00000266970,9606.ENSP00000289153,9606.ENSP00000329140,9606.ENSP00000350359,9606.ENSP00000387699,9606.ENSP00000429089	MAPK1,CCND1,CDKN1B,KRAS,MDM2,EP300,PIK3CA,CDK2,PIK3CB,CREB3L2,CREB5,CREB1,CCNE2
hsa05167	Kaposi sarcoma-associated herpesvirus infection	13	187	1.63	3.60e-17	9606.ENSP00000215832,9606.ENSP00000227507,9606.ENSP00000256078,9606.ENSP00000262904,9606.ENSP00000263253,9606.ENSP00000263826,9606.ENSP00000263967,9606.ENSP00000282111,9606.ENSP00000289153,9606.ENSP00000324806,9606.ENSP00000344456,9606.ENSP00000387699,9606.ENSP00000430684	MAPK1,CCND1,KRAS,E2F3,EP300,AKT3,PIK3CA,TCF7L1,PIK3CB,GSK3B,CTNNB1,CREB1,IKBKB
hsa04915	Estrogen signaling pathway	12	133	1.74	4.53e-17	9606.ENSP00000215832,9606.ENSP00000256078,9606.ENSP00000263826,9606.ENSP00000263967,9606.ENSP00000275493,9606.ENSP00000289153,9606.ENSP00000329140,9606.ENSP00000335153,9606.ENSP00000350359,9606.ENSP00000381185,9606.ENSP00000387699,9606.ENSP00000387784	MAPK1,KRAS,AKT3,PIK3CA,EGFR,PIK3CB,CREB3L2,HSP90AA1,CREB5,BCL2,CREB1,SOS1
hsa05222	Small cell lung cancer	11	92	1.86	7.42e-17	9606.ENSP00000227507,9606.ENSP00000228872,9606.ENSP00000262904,9606.ENSP00000263826,9606.ENSP00000263967,9606.ENSP00000266970,9606.ENSP00000289153,9606.ENSP00000361021,9606.ENSP00000381185,9606.ENSP00000429089,9606.ENSP00000430684	CCND1,CDKN1B,E2F3,AKT3,PIK3CA,CDK2,PIK3CB,PTEN,BCL2,CCNE2,IKBKB
hsa04218	Cellular senescence	12	150	1.69	1.64e-16	9606.ENSP00000215832,9606.ENSP00000227507,9606.ENSP00000256078,9606.ENSP00000258149,9606.ENSP00000262904,9606.ENSP00000263826,9606.ENSP00000263967,9606.ENSP00000266970,9606.ENSP00000289153,9606.ENSP00000361021,9606.ENSP00000368880,9606.ENSP00000429089	MAPK1,CCND1,KRAS,MDM2,E2F3,AKT3,PIK3CA,CDK2,PIK3CB,PTEN,FOXO1,CCNE2
hsa05223	Non-small cell lung cancer	10	68	1.95	3.95e-16	9606.ENSP00000215832,9606.ENSP00000227507,9606.ENSP00000256078,9606.ENSP00000262904,9606.ENSP00000263826,9606.ENSP00000263967,9606.ENSP00000265171,9606.ENSP00000275493,9606.ENSP00000289153,9606.ENSP00000387784	MAPK1,CCND1,KRAS,E2F3,AKT3,PIK3CA,EGF,EGFR,PIK3CB,SOS1
hsa05212	Pancreatic cancer	10	73	1.92	7.34e-16	9606.ENSP00000215832,9606.ENSP00000227507,9606.ENSP00000256078,9606.ENSP00000262904,9606.ENSP00000263826,9606.ENSP00000263967,9606.ENSP00000265171,9606.ENSP00000275493,9606.ENSP00000289153,9606.ENSP00000430684	MAPK1,CCND1,KRAS,E2F3,AKT3,PIK3CA,EGF,EGFR,PIK3CB,IKBKB
hsa04935	Growth hormone synthesis, secretion and action	11	118	1.76	8.36e-16	9606.ENSP00000215832,9606.ENSP00000256078,9606.ENSP00000263253,9606.ENSP00000263826,9606.ENSP00000263967,9606.ENSP00000289153,9606.ENSP00000324806,9606.ENSP00000329140,9606.ENSP00000350359,9606.ENSP00000387699,9606.ENSP00000387784	MAPK1,KRAS,EP300,AKT3,PIK3CA,PIK3CB,GSK3B,CREB3L2,CREB5,CREB1,SOS1
hsa04919	Thyroid hormone signaling pathway	11	119	1.75	8.83e-16	9606.ENSP00000215832,9606.ENSP00000227507,9606.ENSP00000256078,9606.ENSP00000258149,9606.ENSP00000263253,9606.ENSP00000263826,9606.ENSP00000263967,9606.ENSP00000289153,9606.ENSP00000324806,9606.ENSP00000344456,9606.ENSP00000368880	MAPK1,CCND1,KRAS,MDM2,EP300,AKT3,PIK3CA,PIK3CB,GSK3B,CTNNB1,FOXO1
hsa04012	ErbB signaling pathway	10	83	1.87	2.19e-15	9606.ENSP00000215832,9606.ENSP00000228872,9606.ENSP00000256078,9606.ENSP00000263826,9606.ENSP00000263967,9606.ENSP00000265171,9606.ENSP00000275493,9606.ENSP00000289153,9606.ENSP00000324806,9606.ENSP00000387784	MAPK1,CDKN1B,KRAS,AKT3,PIK3CA,EGF,EGFR,PIK3CB,GSK3B,SOS1
hsa04014	Ras signaling pathway	12	226	1.51	1.45e-14	9606.ENSP00000215832,9606.ENSP00000256078,9606.ENSP00000263826,9606.ENSP00000263967,9606.ENSP00000265171,9606.ENSP00000268035,9606.ENSP00000275493,9606.ENSP00000289153,9606.ENSP00000346508,9606.ENSP00000387784,9606.ENSP00000410294,9606.ENSP00000430684	MAPK1,KRAS,AKT3,PIK3CA,EGF,IGF1R,EGFR,PIK3CB,PDGFA,SOS1,FGFR2,IKBKB
hsa04066	HIF-1 signaling pathway	10	106	1.76	2.03e-14	9606.ENSP00000215832,9606.ENSP00000228872,9606.ENSP00000263253,9606.ENSP00000263826,9606.ENSP00000263967,9606.ENSP00000265171,9606.ENSP00000268035,9606.ENSP00000275493,9606.ENSP00000289153,9606.ENSP00000381185	MAPK1,CDKN1B,EP300,AKT3,PIK3CA,EGF,IGF1R,EGFR,PIK3CB,BCL2
hsa04931	Insulin resistance	10	107	1.76	2.15e-14	9606.ENSP00000263826,9606.ENSP00000263967,9606.ENSP00000289153,9606.ENSP00000324806,9606.ENSP00000329140,9606.ENSP00000350359,9606.ENSP00000361021,9606.ENSP00000368880,9606.ENSP00000387699,9606.ENSP00000430684	AKT3,PIK3CA,PIK3CB,GSK3B,CREB3L2,CREB5,PTEN,FOXO1,CREB1,IKBKB
hsa05221	Acute myeloid leukemia	9	66	1.92	2.61e-14	9606.ENSP00000215832,9606.ENSP00000227507,9606.ENSP00000256078,9606.ENSP00000263826,9606.ENSP00000263967,9606.ENSP00000282111,9606.ENSP00000289153,9606.ENSP00000387784,9606.ENSP00000430684	MAPK1,CCND1,KRAS,AKT3,PIK3CA,TCF7L1,PIK3CB,SOS1,IKBKB
hsa04926	Relaxin signaling pathway	10	128	1.68	1.11e-13	9606.ENSP00000215832,9606.ENSP00000256078,9606.ENSP00000263826,9606.ENSP00000263967,9606.ENSP00000275493,9606.ENSP00000289153,9606.ENSP00000329140,9606.ENSP00000350359,9606.ENSP00000387699,9606.ENSP00000387784	MAPK1,KRAS,AKT3,PIK3CA,EGFR,PIK3CB,CREB3L2,CREB5,CREB1,SOS1
hsa05169	Epstein-Barr virus infection	11	193	1.54	1.12e-13	9606.ENSP00000227507,9606.ENSP00000228872,9606.ENSP00000258149,9606.ENSP00000262904,9606.ENSP00000263826,9606.ENSP00000263967,9606.ENSP00000266970,9606.ENSP00000289153,9606.ENSP00000381185,9606.ENSP00000429089,9606.ENSP00000430684	CCND1,CDKN1B,MDM2,E2F3,AKT3,PIK3CA,CDK2,PIK3CB,BCL2,CCNE2,IKBKB
hsa05205	Proteoglycans in cancer	11	196	1.54	1.28e-13	9606.ENSP00000215832,9606.ENSP00000227507,9606.ENSP00000256078,9606.ENSP00000258149,9606.ENSP00000263826,9606.ENSP00000263967,9606.ENSP00000268035,9606.ENSP00000275493,9606.ENSP00000289153,9606.ENSP00000344456,9606.ENSP00000387784	MAPK1,CCND1,KRAS,MDM2,AKT3,PIK3CA,IGF1R,EGFR,PIK3CB,CTNNB1,SOS1
hsa04015	Rap1 signaling pathway	11	202	1.52	1.71e-13	9606.ENSP00000215832,9606.ENSP00000256078,9606.ENSP00000263826,9606.ENSP00000263967,9606.ENSP00000265171,9606.ENSP00000268035,9606.ENSP00000275493,9606.ENSP00000289153,9606.ENSP00000344456,9606.ENSP00000346508,9606.ENSP00000410294	MAPK1,KRAS,AKT3,PIK3CA,EGF,IGF1R,EGFR,PIK3CB,CTNNB1,PDGFA,FGFR2
hsa05162	Measles	10	138	1.65	2.03e-13	9606.ENSP00000227507,9606.ENSP00000228872,9606.ENSP00000263826,9606.ENSP00000263967,9606.ENSP00000266970,9606.ENSP00000289153,9606.ENSP00000324806,9606.ENSP00000381185,9606.ENSP00000429089,9606.ENSP00000430684	CCND1,CDKN1B,AKT3,PIK3CA,CDK2,PIK3CB,GSK3B,BCL2,CCNE2,IKBKB
hsa04211	Longevity regulating pathway	9	87	1.8	2.26e-13	9606.ENSP00000256078,9606.ENSP00000263826,9606.ENSP00000263967,9606.ENSP00000268035,9606.ENSP00000289153,9606.ENSP00000329140,9606.ENSP00000350359,9606.ENSP00000368880,9606.ENSP00000387699	KRAS,AKT3,PIK3CA,IGF1R,PIK3CB,CREB3L2,CREB5,FOXO1,CREB1
hsa05235	PD-L1 expression and PD-1 checkpoint pathway in cancer	9	88	1.8	2.43e-13	9606.ENSP00000215832,9606.ENSP00000256078,9606.ENSP00000263826,9606.ENSP00000263967,9606.ENSP00000265171,9606.ENSP00000275493,9606.ENSP00000289153,9606.ENSP00000361021,9606.ENSP00000430684	MAPK1,KRAS,AKT3,PIK3CA,EGF,EGFR,PIK3CB,PTEN,IKBKB
hsa04150	mTOR signaling pathway	10	151	1.61	4.45e-13	9606.ENSP00000215832,9606.ENSP00000256078,9606.ENSP00000263826,9606.ENSP00000263967,9606.ENSP00000268035,9606.ENSP00000289153,9606.ENSP00000324806,9606.ENSP00000361021,9606.ENSP00000387784,9606.ENSP00000430684	MAPK1,KRAS,AKT3,PIK3CA,IGF1R,PIK3CB,GSK3B,PTEN,SOS1,IKBKB
hsa05231	Choline metabolism in cancer	9	96	1.76	4.85e-13	9606.ENSP00000215832,9606.ENSP00000256078,9606.ENSP00000263826,9606.ENSP00000263967,9606.ENSP00000265171,9606.ENSP00000275493,9606.ENSP00000289153,9606.ENSP00000346508,9606.ENSP00000387784	MAPK1,KRAS,AKT3,PIK3CA,EGF,EGFR,PIK3CB,PDGFA,SOS1
hsa04933	AGE-RAGE signaling pathway in diabetic complications	9	98	1.75	5.64e-13	9606.ENSP00000215832,9606.ENSP00000227507,9606.ENSP00000228872,9606.ENSP00000256078,9606.ENSP00000263826,9606.ENSP00000263967,9606.ENSP00000289153,9606.ENSP00000368880,9606.ENSP00000381185	MAPK1,CCND1,CDKN1B,KRAS,AKT3,PIK3CA,PIK3CB,FOXO1,BCL2
hsa04630	JAK-STAT signaling pathway	10	160	1.58	7.23e-13	9606.ENSP00000227507,9606.ENSP00000263253,9606.ENSP00000263826,9606.ENSP00000263967,9606.ENSP00000265171,9606.ENSP00000275493,9606.ENSP00000289153,9606.ENSP00000346508,9606.ENSP00000381185,9606.ENSP00000387784	CCND1,EP300,AKT3,PIK3CA,EGF,EGFR,PIK3CB,PDGFA,BCL2,SOS1
hsa04725	Cholinergic synapse	9	110	1.7	1.44e-12	9606.ENSP00000215832,9606.ENSP00000256078,9606.ENSP00000263826,9606.ENSP00000263967,9606.ENSP00000289153,9606.ENSP00000329140,9606.ENSP00000350359,9606.ENSP00000381185,9606.ENSP00000387699	MAPK1,KRAS,AKT3,PIK3CA,PIK3CB,CREB3L2,CREB5,BCL2,CREB1
hsa04722	Neurotrophin signaling pathway	9	114	1.68	1.91e-12	9606.ENSP00000215832,9606.ENSP00000256078,9606.ENSP00000263826,9606.ENSP00000263967,9606.ENSP00000289153,9606.ENSP00000324806,9606.ENSP00000381185,9606.ENSP00000387784,9606.ENSP00000430684	MAPK1,KRAS,AKT3,PIK3CA,PIK3CB,GSK3B,BCL2,SOS1,IKBKB
hsa04917	Prolactin signaling pathway	8	69	1.85	2.56e-12	9606.ENSP00000215832,9606.ENSP00000227507,9606.ENSP00000256078,9606.ENSP00000263826,9606.ENSP00000263967,9606.ENSP00000289153,9606.ENSP00000324806,9606.ENSP00000387784	MAPK1,CCND1,KRAS,AKT3,PIK3CA,PIK3CB,GSK3B,SOS1
hsa05230	Central carbon metabolism in cancer	8	69	1.85	2.56e-12	9606.ENSP00000215832,9606.ENSP00000256078,9606.ENSP00000263826,9606.ENSP00000263967,9606.ENSP00000275493,9606.ENSP00000289153,9606.ENSP00000361021,9606.ENSP00000410294	MAPK1,KRAS,AKT3,PIK3CA,EGFR,PIK3CB,PTEN,FGFR2
hsa04152	AMPK signaling pathway	9	120	1.66	2.79e-12	9606.ENSP00000227507,9606.ENSP00000263826,9606.ENSP00000263967,9606.ENSP00000268035,9606.ENSP00000289153,9606.ENSP00000329140,9606.ENSP00000350359,9606.ENSP00000368880,9606.ENSP00000387699	CCND1,AKT3,PIK3CA,IGF1R,PIK3CB,CREB3L2,CREB5,FOXO1,CREB1
hsa04662	B cell receptor signaling pathway	8	78	1.8	6.03e-12	9606.ENSP00000215832,9606.ENSP00000256078,9606.ENSP00000263826,9606.ENSP00000263967,9606.ENSP00000289153,9606.ENSP00000324806,9606.ENSP00000387784,9606.ENSP00000430684	MAPK1,KRAS,AKT3,PIK3CA,PIK3CB,GSK3B,SOS1,IKBKB
hsa04910	Insulin signaling pathway	9	133	1.62	6.45e-12	9606.ENSP00000215832,9606.ENSP00000256078,9606.ENSP00000263826,9606.ENSP00000263967,9606.ENSP00000289153,9606.ENSP00000324806,9606.ENSP00000368880,9606.ENSP00000387784,9606.ENSP00000430684	MAPK1,KRAS,AKT3,PIK3CA,PIK3CB,GSK3B,FOXO1,SOS1,IKBKB
hsa05219	Bladder cancer	7	41	2.02	6.57e-12	9606.ENSP00000215832,9606.ENSP00000227507,9606.ENSP00000256078,9606.ENSP00000258149,9606.ENSP00000262904,9606.ENSP00000265171,9606.ENSP00000275493	MAPK1,CCND1,KRAS,MDM2,E2F3,EGF,EGFR
hsa04550	Signaling pathways regulating pluripotency of stem cells	9	140	1.59	9.64e-12	9606.ENSP00000215832,9606.ENSP00000256078,9606.ENSP00000263826,9606.ENSP00000263967,9606.ENSP00000268035,9606.ENSP00000289153,9606.ENSP00000324806,9606.ENSP00000344456,9606.ENSP00000410294	MAPK1,KRAS,AKT3,PIK3CA,IGF1R,PIK3CB,GSK3B,CTNNB1,FGFR2
hsa05131	Shigellosis	10	218	1.45	1.13e-11	9606.ENSP00000215832,9606.ENSP00000258149,9606.ENSP00000263826,9606.ENSP00000263967,9606.ENSP00000275493,9606.ENSP00000289153,9606.ENSP00000324806,9606.ENSP00000368880,9606.ENSP00000381185,9606.ENSP00000430684	MAPK1,MDM2,AKT3,PIK3CA,EGFR,PIK3CB,GSK3B,FOXO1,BCL2,IKBKB
hsa04072	Phospholipase D signaling pathway	9	147	1.57	1.41e-11	9606.ENSP00000215832,9606.ENSP00000256078,9606.ENSP00000263826,9606.ENSP00000263967,9606.ENSP00000265171,9606.ENSP00000275493,9606.ENSP00000289153,9606.ENSP00000346508,9606.ENSP00000387784	MAPK1,KRAS,AKT3,PIK3CA,EGF,EGFR,PIK3CB,PDGFA,SOS1
hsa04914	Progesterone-mediated oocyte maturation	8	94	1.72	2.20e-11	9606.ENSP00000215832,9606.ENSP00000256078,9606.ENSP00000263826,9606.ENSP00000263967,9606.ENSP00000266970,9606.ENSP00000268035,9606.ENSP00000289153,9606.ENSP00000335153	MAPK1,KRAS,AKT3,PIK3CA,CDK2,IGF1R,PIK3CB,HSP90AA1
hsa04916	Melanogenesis	8	95	1.71	2.34e-11	9606.ENSP00000215832,9606.ENSP00000256078,9606.ENSP00000263253,9606.ENSP00000282111,9606.ENSP00000324806,9606.ENSP00000329140,9606.ENSP00000344456,9606.ENSP00000387699	MAPK1,KRAS,EP300,TCF7L1,GSK3B,CREB3L2,CTNNB1,CREB1
hsa04660	T cell receptor signaling pathway	8	101	1.69	3.66e-11	9606.ENSP00000215832,9606.ENSP00000256078,9606.ENSP00000263826,9606.ENSP00000263967,9606.ENSP00000289153,9606.ENSP00000324806,9606.ENSP00000387784,9606.ENSP00000430684	MAPK1,KRAS,AKT3,PIK3CA,PIK3CB,GSK3B,SOS1,IKBKB
hsa04668	TNF signaling pathway	8	112	1.64	7.86e-11	9606.ENSP00000215832,9606.ENSP00000263826,9606.ENSP00000263967,9606.ENSP00000289153,9606.ENSP00000329140,9606.ENSP00000350359,9606.ENSP00000387699,9606.ENSP00000430684	MAPK1,AKT3,PIK3CA,PIK3CB,CREB3L2,CREB5,CREB1,IKBKB
hsa05211	Renal cell carcinoma	7	66	1.81	1.23e-10	9606.ENSP00000215832,9606.ENSP00000256078,9606.ENSP00000263253,9606.ENSP00000263826,9606.ENSP00000263967,9606.ENSP00000289153,9606.ENSP00000387784	MAPK1,KRAS,EP300,AKT3,PIK3CA,PIK3CB,SOS1
hsa04110	Cell cycle	8	120	1.61	1.29e-10	9606.ENSP00000227507,9606.ENSP00000228872,9606.ENSP00000258149,9606.ENSP00000262904,9606.ENSP00000263253,9606.ENSP00000266970,9606.ENSP00000324806,9606.ENSP00000429089	CCND1,CDKN1B,MDM2,E2F3,EP300,CDK2,GSK3B,CCNE2
hsa04010	MAPK signaling pathway	10	288	1.33	1.41e-10	9606.ENSP00000215832,9606.ENSP00000256078,9606.ENSP00000263826,9606.ENSP00000265171,9606.ENSP00000268035,9606.ENSP00000275493,9606.ENSP00000346508,9606.ENSP00000387784,9606.ENSP00000410294,9606.ENSP00000430684	MAPK1,KRAS,AKT3,EGF,IGF1R,EGFR,PDGFA,SOS1,FGFR2,IKBKB
hsa04140	Autophagy - animal	8	130	1.58	2.29e-10	9606.ENSP00000215832,9606.ENSP00000256078,9606.ENSP00000263826,9606.ENSP00000263967,9606.ENSP00000268035,9606.ENSP00000289153,9606.ENSP00000361021,9606.ENSP00000381185	MAPK1,KRAS,AKT3,PIK3CA,IGF1R,PIK3CB,PTEN,BCL2
hsa05418	Fluid shear stress and atherosclerosis	8	130	1.58	2.29e-10	9606.ENSP00000263826,9606.ENSP00000263967,9606.ENSP00000289153,9606.ENSP00000335153,9606.ENSP00000344456,9606.ENSP00000346508,9606.ENSP00000381185,9606.ENSP00000430684	AKT3,PIK3CA,PIK3CB,HSP90AA1,CTNNB1,PDGFA,BCL2,IKBKB
hsa04810	Regulation of actin cytoskeleton	9	209	1.42	2.45e-10	9606.ENSP00000215832,9606.ENSP00000256078,9606.ENSP00000263967,9606.ENSP00000265171,9606.ENSP00000275493,9606.ENSP00000289153,9606.ENSP00000346508,9606.ENSP00000387784,9606.ENSP00000410294	MAPK1,KRAS,PIK3CA,EGF,EGFR,PIK3CB,PDGFA,SOS1,FGFR2
hsa05132	Salmonella infection	9	209	1.42	2.45e-10	9606.ENSP00000215832,9606.ENSP00000263826,9606.ENSP00000263967,9606.ENSP00000282111,9606.ENSP00000289153,9606.ENSP00000335153,9606.ENSP00000344456,9606.ENSP00000381185,9606.ENSP00000430684	MAPK1,AKT3,PIK3CA,TCF7L1,PIK3CB,HSP90AA1,CTNNB1,BCL2,IKBKB
hsa04625	C-type lectin receptor signaling pathway	7	102	1.62	1.95e-09	9606.ENSP00000215832,9606.ENSP00000256078,9606.ENSP00000258149,9606.ENSP00000263826,9606.ENSP00000263967,9606.ENSP00000289153,9606.ENSP00000430684	MAPK1,KRAS,MDM2,AKT3,PIK3CA,PIK3CB,IKBKB
hsa04062	Chemokine signaling pathway	8	186	1.42	3.24e-09	9606.ENSP00000215832,9606.ENSP00000256078,9606.ENSP00000263826,9606.ENSP00000263967,9606.ENSP00000289153,9606.ENSP00000324806,9606.ENSP00000387784,9606.ENSP00000430684	MAPK1,KRAS,AKT3,PIK3CA,PIK3CB,GSK3B,SOS1,IKBKB
hsa04071	Sphingolipid signaling pathway	7	116	1.57	4.45e-09	9606.ENSP00000215832,9606.ENSP00000256078,9606.ENSP00000263826,9606.ENSP00000263967,9606.ENSP00000289153,9606.ENSP00000361021,9606.ENSP00000381185	MAPK1,KRAS,AKT3,PIK3CA,PIK3CB,PTEN,BCL2
hsa04213	Longevity regulating pathway - multiple species	6	61	1.78	4.94e-09	9606.ENSP00000256078,9606.ENSP00000263826,9606.ENSP00000263967,9606.ENSP00000268035,9606.ENSP00000289153,9606.ENSP00000368880	KRAS,AKT3,PIK3CA,IGF1R,PIK3CB,FOXO1
hsa04024	cAMP signaling pathway	8	208	1.37	7.28e-09	9606.ENSP00000215832,9606.ENSP00000263253,9606.ENSP00000263826,9606.ENSP00000263967,9606.ENSP00000289153,9606.ENSP00000329140,9606.ENSP00000350359,9606.ENSP00000387699	MAPK1,EP300,AKT3,PIK3CA,PIK3CB,CREB3L2,CREB5,CREB1
hsa04664	Fc epsilon RI signaling pathway	6	66	1.74	7.48e-09	9606.ENSP00000215832,9606.ENSP00000256078,9606.ENSP00000263826,9606.ENSP00000263967,9606.ENSP00000289153,9606.ENSP00000387784	MAPK1,KRAS,AKT3,PIK3CA,PIK3CB,SOS1
hsa04520	Adherens junction	6	67	1.74	8.04e-09	9606.ENSP00000215832,9606.ENSP00000263253,9606.ENSP00000268035,9606.ENSP00000275493,9606.ENSP00000282111,9606.ENSP00000344456	MAPK1,EP300,IGF1R,EGFR,TCF7L1,CTNNB1
hsa04210	Apoptosis	7	132	1.51	9.82e-09	9606.ENSP00000215832,9606.ENSP00000256078,9606.ENSP00000263826,9606.ENSP00000263967,9606.ENSP00000289153,9606.ENSP00000381185,9606.ENSP00000430684	MAPK1,KRAS,AKT3,PIK3CA,PIK3CB,BCL2,IKBKB
hsa01524	Platinum drug resistance	6	70	1.72	1.00e-08	9606.ENSP00000215832,9606.ENSP00000258149,9606.ENSP00000263826,9606.ENSP00000263967,9606.ENSP00000289153,9606.ENSP00000381185	MAPK1,MDM2,AKT3,PIK3CA,PIK3CB,BCL2
hsa04115	p53 signaling pathway	6	72	1.71	1.16e-08	9606.ENSP00000227507,9606.ENSP00000258149,9606.ENSP00000266970,9606.ENSP00000361021,9606.ENSP00000381185,9606.ENSP00000429089	CCND1,MDM2,CDK2,PTEN,BCL2,CCNE2
hsa05216	Thyroid cancer	5	36	1.93	2.53e-08	9606.ENSP00000215832,9606.ENSP00000227507,9606.ENSP00000256078,9606.ENSP00000282111,9606.ENSP00000344456	MAPK1,CCND1,KRAS,TCF7L1,CTNNB1
hsa04540	Gap junction	6	87	1.62	3.30e-08	9606.ENSP00000215832,9606.ENSP00000256078,9606.ENSP00000265171,9606.ENSP00000275493,9606.ENSP00000346508,9606.ENSP00000387784	MAPK1,KRAS,EGF,EGFR,PDGFA,SOS1
hsa05202	Transcriptional misregulation in cancer	7	171	1.4	5.16e-08	9606.ENSP00000228872,9606.ENSP00000258149,9606.ENSP00000268035,9606.ENSP00000306894,9606.ENSP00000346508,9606.ENSP00000354487,9606.ENSP00000368880	CDKN1B,MDM2,IGF1R,ETV5,PDGFA,ZEB1,FOXO1
hsa04922	Glucagon signaling pathway	6	101	1.56	7.51e-08	9606.ENSP00000263253,9606.ENSP00000263826,9606.ENSP00000329140,9606.ENSP00000350359,9606.ENSP00000368880,9606.ENSP00000387699	EP300,AKT3,CREB3L2,CREB5,FOXO1,CREB1
hsa04928	Parathyroid hormone synthesis, secretion and action	6	103	1.55	8.30e-08	9606.ENSP00000215832,9606.ENSP00000275493,9606.ENSP00000329140,9606.ENSP00000350359,9606.ENSP00000381185,9606.ENSP00000387699	MAPK1,EGFR,CREB3L2,CREB5,BCL2,CREB1
hsa05170	Human immunodeficiency virus 1 infection	7	204	1.32	1.61e-07	9606.ENSP00000215832,9606.ENSP00000256078,9606.ENSP00000263826,9606.ENSP00000263967,9606.ENSP00000289153,9606.ENSP00000381185,9606.ENSP00000430684	MAPK1,KRAS,AKT3,PIK3CA,PIK3CB,BCL2,IKBKB
hsa04370	VEGF signaling pathway	5	57	1.73	1.98e-07	9606.ENSP00000215832,9606.ENSP00000256078,9606.ENSP00000263826,9606.ENSP00000263967,9606.ENSP00000289153	MAPK1,KRAS,AKT3,PIK3CA,PIK3CB
hsa04380	Osteoclast differentiation	6	122	1.48	2.10e-07	9606.ENSP00000215832,9606.ENSP00000263826,9606.ENSP00000263967,9606.ENSP00000289153,9606.ENSP00000387699,9606.ENSP00000430684	MAPK1,AKT3,PIK3CA,PIK3CB,CREB1,IKBKB
hsa05135	Yersinia infection	6	125	1.47	2.38e-07	9606.ENSP00000215832,9606.ENSP00000263826,9606.ENSP00000263967,9606.ENSP00000289153,9606.ENSP00000324806,9606.ENSP00000430684	MAPK1,AKT3,PIK3CA,PIK3CB,GSK3B,IKBKB
hsa04929	GnRH secretion	5	63	1.69	3.06e-07	9606.ENSP00000215832,9606.ENSP00000256078,9606.ENSP00000263826,9606.ENSP00000263967,9606.ENSP00000289153	MAPK1,KRAS,AKT3,PIK3CA,PIK3CB
hsa05010	Alzheimer disease	8	355	1.14	3.42e-07	9606.ENSP00000215832,9606.ENSP00000256078,9606.ENSP00000263826,9606.ENSP00000263967,9606.ENSP00000289153,9606.ENSP00000324806,9606.ENSP00000344456,9606.ENSP00000430684	MAPK1,KRAS,AKT3,PIK3CA,PIK3CB,GSK3B,CTNNB1,IKBKB
hsa05034	Alcoholism	6	144	1.41	5.16e-07	9606.ENSP00000215832,9606.ENSP00000256078,9606.ENSP00000329140,9606.ENSP00000350359,9606.ENSP00000387699,9606.ENSP00000387784	MAPK1,KRAS,CREB3L2,CREB5,CREB1,SOS1
hsa04261	Adrenergic signaling in cardiomyocytes	6	147	1.4	5.74e-07	9606.ENSP00000215832,9606.ENSP00000263826,9606.ENSP00000329140,9606.ENSP00000350359,9606.ENSP00000381185,9606.ENSP00000387699	MAPK1,AKT3,CREB3L2,CREB5,BCL2,CREB1
hsa05020	Prion disease	7	265	1.21	8.30e-07	9606.ENSP00000215832,9606.ENSP00000263967,9606.ENSP00000289153,9606.ENSP00000324806,9606.ENSP00000329140,9606.ENSP00000350359,9606.ENSP00000387699	MAPK1,PIK3CA,PIK3CB,GSK3B,CREB3L2,CREB5,CREB1
hsa05164	Influenza A	6	165	1.35	1.08e-06	9606.ENSP00000215832,9606.ENSP00000263253,9606.ENSP00000263826,9606.ENSP00000263967,9606.ENSP00000289153,9606.ENSP00000430684	MAPK1,EP300,AKT3,PIK3CA,PIK3CB,IKBKB
hsa04960	Aldosterone-regulated sodium reabsorption	4	37	1.82	2.01e-06	9606.ENSP00000215832,9606.ENSP00000256078,9606.ENSP00000263967,9606.ENSP00000289153	MAPK1,KRAS,PIK3CA,PIK3CB
hsa05142	Chagas disease	5	99	1.49	2.40e-06	9606.ENSP00000215832,9606.ENSP00000263826,9606.ENSP00000263967,9606.ENSP00000289153,9606.ENSP00000430684	MAPK1,AKT3,PIK3CA,PIK3CB,IKBKB
hsa04620	Toll-like receptor signaling pathway	5	101	1.48	2.61e-06	9606.ENSP00000215832,9606.ENSP00000263826,9606.ENSP00000263967,9606.ENSP00000289153,9606.ENSP00000430684	MAPK1,AKT3,PIK3CA,PIK3CB,IKBKB
hsa04930	Type II diabetes mellitus	4	46	1.73	4.38e-06	9606.ENSP00000215832,9606.ENSP00000263967,9606.ENSP00000289153,9606.ENSP00000430684	MAPK1,PIK3CA,PIK3CB,IKBKB
hsa04650	Natural killer cell mediated cytotoxicity	5	121	1.4	6.03e-06	9606.ENSP00000215832,9606.ENSP00000256078,9606.ENSP00000263967,9606.ENSP00000289153,9606.ENSP00000387784	MAPK1,KRAS,PIK3CA,PIK3CB,SOS1
hsa04728	Dopaminergic synapse	5	128	1.38	7.80e-06	9606.ENSP00000263826,9606.ENSP00000324806,9606.ENSP00000329140,9606.ENSP00000350359,9606.ENSP00000387699	AKT3,GSK3B,CREB3L2,CREB5,CREB1
hsa04932	Non-alcoholic fatty liver disease	5	148	1.32	1.53e-05	9606.ENSP00000263826,9606.ENSP00000263967,9606.ENSP00000289153,9606.ENSP00000324806,9606.ENSP00000430684	AKT3,PIK3CA,PIK3CB,GSK3B,IKBKB
hsa04310	Wnt signaling pathway	5	154	1.3	1.83e-05	9606.ENSP00000227507,9606.ENSP00000263253,9606.ENSP00000282111,9606.ENSP00000324806,9606.ENSP00000344456	CCND1,EP300,TCF7L1,GSK3B,CTNNB1
hsa04022	cGMP-PKG signaling pathway	5	162	1.28	2.31e-05	9606.ENSP00000215832,9606.ENSP00000263826,9606.ENSP00000329140,9606.ENSP00000350359,9606.ENSP00000387699	MAPK1,AKT3,CREB3L2,CREB5,CREB1
hsa05152	Tuberculosis	5	168	1.26	2.71e-05	9606.ENSP00000215832,9606.ENSP00000263253,9606.ENSP00000263826,9606.ENSP00000381185,9606.ENSP00000387699	MAPK1,EP300,AKT3,BCL2,CREB1
hsa04360	Axon guidance	5	177	1.24	3.44e-05	9606.ENSP00000215832,9606.ENSP00000256078,9606.ENSP00000263967,9606.ENSP00000289153,9606.ENSP00000324806	MAPK1,KRAS,PIK3CA,PIK3CB,GSK3B
hsa04912	GnRH signaling pathway	4	89	1.44	4.89e-05	9606.ENSP00000215832,9606.ENSP00000256078,9606.ENSP00000275493,9606.ENSP00000387784	MAPK1,KRAS,EGFR,SOS1
hsa04666	Fc gamma R-mediated phagocytosis	4	90	1.43	5.06e-05	9606.ENSP00000215832,9606.ENSP00000263826,9606.ENSP00000263967,9606.ENSP00000289153	MAPK1,AKT3,PIK3CA,PIK3CB
hsa04657	IL-17 signaling pathway	4	92	1.42	5.44e-05	9606.ENSP00000215832,9606.ENSP00000324806,9606.ENSP00000335153,9606.ENSP00000430684	MAPK1,GSK3B,HSP90AA1,IKBKB
hsa05145	Toxoplasmosis	4	105	1.37	8.90e-05	9606.ENSP00000215832,9606.ENSP00000263826,9606.ENSP00000381185,9606.ENSP00000430684	MAPK1,AKT3,BCL2,IKBKB
hsa04714	Thermogenesis	5	229	1.13	0.00011	9606.ENSP00000256078,9606.ENSP00000329140,9606.ENSP00000350359,9606.ENSP00000387699,9606.ENSP00000387784	KRAS,CREB3L2,CREB5,CREB1,SOS1
hsa04114	Oocyte meiosis	4	120	1.31	0.00014	9606.ENSP00000215832,9606.ENSP00000266970,9606.ENSP00000268035,9606.ENSP00000429089	MAPK1,CDK2,IGF1R,CCNE2
hsa04611	Platelet activation	4	122	1.3	0.00015	9606.ENSP00000215832,9606.ENSP00000263826,9606.ENSP00000263967,9606.ENSP00000289153	MAPK1,AKT3,PIK3CA,PIK3CB
hsa04962	Vasopressin-regulated water reabsorption	3	44	1.62	0.00018	9606.ENSP00000329140,9606.ENSP00000350359,9606.ENSP00000387699	CREB3L2,CREB5,CREB1
hsa04973	Carbohydrate digestion and absorption	3	44	1.62	0.00018	9606.ENSP00000263826,9606.ENSP00000263967,9606.ENSP00000289153	AKT3,PIK3CA,PIK3CB
hsa04371	Apelin signaling pathway	4	131	1.27	0.00019	9606.ENSP00000215832,9606.ENSP00000227507,9606.ENSP00000256078,9606.ENSP00000263826	MAPK1,CCND1,KRAS,AKT3
hsa04340	Hedgehog signaling pathway	3	47	1.59	0.00021	9606.ENSP00000227507,9606.ENSP00000324806,9606.ENSP00000381185	CCND1,GSK3B,BCL2
hsa05030	Cocaine addiction	3	49	1.57	0.00024	9606.ENSP00000329140,9606.ENSP00000350359,9606.ENSP00000387699	CREB3L2,CREB5,CREB1
hsa04921	Oxytocin signaling pathway	4	149	1.22	0.00031	9606.ENSP00000215832,9606.ENSP00000227507,9606.ENSP00000256078,9606.ENSP00000275493	MAPK1,CCND1,KRAS,EGFR
hsa04923	Regulation of lipolysis in adipocytes	3	54	1.53	0.00031	9606.ENSP00000263826,9606.ENSP00000263967,9606.ENSP00000289153	AKT3,PIK3CA,PIK3CB
hsa04390	Hippo signaling pathway	4	153	1.2	0.00034	9606.ENSP00000227507,9606.ENSP00000282111,9606.ENSP00000324806,9606.ENSP00000344456	CCND1,TCF7L1,GSK3B,CTNNB1
hsa04730	Long-term depression	3	59	1.49	0.00039	9606.ENSP00000215832,9606.ENSP00000256078,9606.ENSP00000268035	MAPK1,KRAS,IGF1R
hsa05217	Basal cell carcinoma	3	62	1.47	0.00044	9606.ENSP00000282111,9606.ENSP00000324806,9606.ENSP00000344456	TCF7L1,GSK3B,CTNNB1
hsa04720	Long-term potentiation	3	64	1.46	0.00048	9606.ENSP00000215832,9606.ENSP00000256078,9606.ENSP00000263253	MAPK1,KRAS,EP300
hsa04927	Cortisol synthesis and secretion	3	65	1.45	0.00050	9606.ENSP00000329140,9606.ENSP00000350359,9606.ENSP00000387699	CREB3L2,CREB5,CREB1
hsa04621	NOD-like receptor signaling pathway	4	174	1.15	0.00052	9606.ENSP00000215832,9606.ENSP00000335153,9606.ENSP00000381185,9606.ENSP00000430684	MAPK1,HSP90AA1,BCL2,IKBKB
hsa05031	Amphetamine addiction	3	66	1.44	0.00052	9606.ENSP00000329140,9606.ENSP00000350359,9606.ENSP00000387699	CREB3L2,CREB5,CREB1
hsa05100	Bacterial invasion of epithelial cells	3	70	1.42	0.00060	9606.ENSP00000263967,9606.ENSP00000289153,9606.ENSP00000344456	PIK3CA,PIK3CB,CTNNB1
hsa00562	Inositol phosphate metabolism	3	73	1.4	0.00067	9606.ENSP00000263967,9606.ENSP00000289153,9606.ENSP00000361021	PIK3CA,PIK3CB,PTEN
hsa04918	Thyroid hormone synthesis	3	74	1.39	0.00069	9606.ENSP00000329140,9606.ENSP00000350359,9606.ENSP00000387699	CREB3L2,CREB5,CREB1
hsa04911	Insulin secretion	3	82	1.35	0.00092	9606.ENSP00000329140,9606.ENSP00000350359,9606.ENSP00000387699	CREB3L2,CREB5,CREB1
hsa04070	Phosphatidylinositol signaling system	3	95	1.29	0.0014	9606.ENSP00000263967,9606.ENSP00000289153,9606.ENSP00000361021	PIK3CA,PIK3CB,PTEN
hsa04925	Aldosterone synthesis and secretion	3	95	1.29	0.0014	9606.ENSP00000329140,9606.ENSP00000350359,9606.ENSP00000387699	CREB3L2,CREB5,CREB1
hsa04144	Endocytosis	4	241	1.01	0.0016	9606.ENSP00000258149,9606.ENSP00000268035,9606.ENSP00000275493,9606.ENSP00000410294	MDM2,IGF1R,EGFR,FGFR2
hsa04659	Th17 cell differentiation	3	101	1.26	0.0016	9606.ENSP00000215832,9606.ENSP00000335153,9606.ENSP00000430684	MAPK1,HSP90AA1,IKBKB
hsa04670	Leukocyte transendothelial migration	3	109	1.23	0.0020	9606.ENSP00000263967,9606.ENSP00000289153,9606.ENSP00000344456	PIK3CA,PIK3CB,CTNNB1
hsa05168	Herpes simplex virus 1 infection	5	479	0.8	0.0026	9606.ENSP00000263826,9606.ENSP00000263967,9606.ENSP00000289153,9606.ENSP00000381185,9606.ENSP00000430684	AKT3,PIK3CA,PIK3CB,BCL2,IKBKB
hsa05016	Huntington disease	4	298	0.91	0.0035	9606.ENSP00000263253,9606.ENSP00000329140,9606.ENSP00000350359,9606.ENSP00000387699	EP300,CREB3L2,CREB5,CREB1
hsa05017	Spinocerebellar ataxia	3	135	1.13	0.0036	9606.ENSP00000263826,9606.ENSP00000263967,9606.ENSP00000289153	AKT3,PIK3CA,PIK3CB
hsa04020	Calcium signaling pathway	3	193	0.98	0.0095	9606.ENSP00000265171,9606.ENSP00000275493,9606.ENSP00000346508	EGF,EGFR,PDGFA
hsa04612	Antigen processing and presentation	2	63	1.29	0.0121	9606.ENSP00000335153,9606.ENSP00000387699	HSP90AA1,CREB1
hsa05120	Epithelial cell signaling in Helicobacter pylori infection	2	67	1.26	0.0135	9606.ENSP00000275493,9606.ENSP00000430684	EGFR,IKBKB
hsa04920	Adipocytokine signaling pathway	2	69	1.25	0.0142	9606.ENSP00000263826,9606.ENSP00000430684	AKT3,IKBKB
hsa05412	Arrhythmogenic right ventricular cardiomyopathy	2	76	1.21	0.0169	9606.ENSP00000282111,9606.ENSP00000344456	TCF7L1,CTNNB1
hsa04658	Th1 and Th2 cell differentiation	2	87	1.15	0.0216	9606.ENSP00000215832,9606.ENSP00000430684	MAPK1,IKBKB
hsa04350	TGF-beta signaling pathway	2	91	1.13	0.0233	9606.ENSP00000215832,9606.ENSP00000263253	MAPK1,EP300
hsa04713	Circadian entrainment	2	92	1.12	0.0237	9606.ENSP00000215832,9606.ENSP00000387699	MAPK1,CREB1
hsa04750	Inflammatory mediator regulation of TRP channels	2	94	1.11	0.0245	9606.ENSP00000263967,9606.ENSP00000289153	PIK3CA,PIK3CB
hsa05146	Amoebiasis	2	100	1.09	0.0273	9606.ENSP00000263967,9606.ENSP00000289153	PIK3CA,PIK3CB
hsa04064	NF-kappa B signaling pathway	2	101	1.08	0.0276	9606.ENSP00000381185,9606.ENSP00000430684	BCL2,IKBKB
hsa04726	Serotonergic synapse	2	108	1.05	0.0311	9606.ENSP00000215832,9606.ENSP00000256078	MAPK1,KRAS
