# Supplementary material for: miRNA Expression Patterns in Early- and Late-Stage Prostate Cancer Patients: High-Throughput Analysis
Source: Biomedicines. 2023 Nov 16;11(11):3073. doi: 10.3390/biomedicines11113073 (PMC10669269; doi:10.3390/biomedicines11113073)
Supplement: Supplementary file 1 [file biomedicines-11-03073-s001.zip › File S3_enrichment.WikiPathways.tsv]

#term ID	term description	observed gene count	background gene count	strength	false discovery rate	matching proteins in your network (IDs)	matching proteins in your network (labels)
WP4172	PI3K-Akt signaling pathway	24	336	1.64	6.30e-33	9606.ENSP00000215832,9606.ENSP00000227507,9606.ENSP00000228872,9606.ENSP00000256078,9606.ENSP00000258149,9606.ENSP00000263826,9606.ENSP00000263967,9606.ENSP00000265171,9606.ENSP00000266970,9606.ENSP00000268035,9606.ENSP00000275493,9606.ENSP00000289153,9606.ENSP00000324806,9606.ENSP00000329140,9606.ENSP00000335153,9606.ENSP00000346508,9606.ENSP00000350359,9606.ENSP00000361021,9606.ENSP00000381185,…	MAPK1,CCND1,CDKN1B,KRAS,MDM2,AKT3,PIK3CA,EGF,CDK2,IGF1R,EGFR,PIK3CB,GSK3B,CREB3L2,HSP90AA1,PDGFA,CREB5,PTEN,BCL2,CREB1,SOS1,FGFR2,CCNE2,IKBKB
WP3932	Focal adhesion: PI3K-Akt-mTOR-signaling pathway	21	302	1.63	6.97e-28	9606.ENSP00000215832,9606.ENSP00000228872,9606.ENSP00000256078,9606.ENSP00000258149,9606.ENSP00000263826,9606.ENSP00000263967,9606.ENSP00000265171,9606.ENSP00000268035,9606.ENSP00000275493,9606.ENSP00000289153,9606.ENSP00000324806,9606.ENSP00000329140,9606.ENSP00000335153,9606.ENSP00000346508,9606.ENSP00000350359,9606.ENSP00000361021,9606.ENSP00000368880,9606.ENSP00000387699,9606.ENSP00000387784,…	MAPK1,CDKN1B,KRAS,MDM2,AKT3,PIK3CA,EGF,IGF1R,EGFR,PIK3CB,GSK3B,CREB3L2,HSP90AA1,PDGFA,CREB5,PTEN,FOXO1,CREB1,SOS1,FGFR2,IKBKB
WP4155	Endometrial cancer	15	63	2.16	2.89e-26	9606.ENSP00000215832,9606.ENSP00000227507,9606.ENSP00000256078,9606.ENSP00000263826,9606.ENSP00000263967,9606.ENSP00000265171,9606.ENSP00000275493,9606.ENSP00000282111,9606.ENSP00000289153,9606.ENSP00000324806,9606.ENSP00000344456,9606.ENSP00000358404,9606.ENSP00000361021,9606.ENSP00000387784,9606.ENSP00000410294	MAPK1,CCND1,KRAS,AKT3,PIK3CA,EGF,EGFR,TCF7L1,PIK3CB,GSK3B,CTNNB1,TCF7L2,PTEN,SOS1,FGFR2
WP3981	miRNA regulation of prostate cancer signaling pathways	13	33	2.38	5.78e-25	9606.ENSP00000215832,9606.ENSP00000227507,9606.ENSP00000228872,9606.ENSP00000256078,9606.ENSP00000258149,9606.ENSP00000263826,9606.ENSP00000263967,9606.ENSP00000324806,9606.ENSP00000344456,9606.ENSP00000346508,9606.ENSP00000368880,9606.ENSP00000381185,9606.ENSP00000387784	MAPK1,CCND1,CDKN1B,KRAS,MDM2,AKT3,PIK3CA,GSK3B,CTNNB1,PDGFA,FOXO1,BCL2,SOS1
WP2261	Glioblastoma signaling pathways	15	82	2.05	6.04e-25	9606.ENSP00000215832,9606.ENSP00000227507,9606.ENSP00000228872,9606.ENSP00000256078,9606.ENSP00000258149,9606.ENSP00000263253,9606.ENSP00000263826,9606.ENSP00000263967,9606.ENSP00000266970,9606.ENSP00000268035,9606.ENSP00000275493,9606.ENSP00000289153,9606.ENSP00000361021,9606.ENSP00000368880,9606.ENSP00000410294	MAPK1,CCND1,CDKN1B,KRAS,MDM2,EP300,AKT3,PIK3CA,CDK2,IGF1R,EGFR,PIK3CB,PTEN,FOXO1,FGFR2
WP4806	EGFR tyrosine kinase inhibitor resistance	15	83	2.04	6.04e-25	9606.ENSP00000215832,9606.ENSP00000227507,9606.ENSP00000256078,9606.ENSP00000263826,9606.ENSP00000263967,9606.ENSP00000265171,9606.ENSP00000268035,9606.ENSP00000275493,9606.ENSP00000289153,9606.ENSP00000324806,9606.ENSP00000346508,9606.ENSP00000361021,9606.ENSP00000381185,9606.ENSP00000387784,9606.ENSP00000410294	MAPK1,CCND1,KRAS,AKT3,PIK3CA,EGF,IGF1R,EGFR,PIK3CB,GSK3B,PDGFA,PTEN,BCL2,SOS1,FGFR2
WP710	DNA damage response (only ATM dependent)	15	110	1.92	2.47e-23	9606.ENSP00000215832,9606.ENSP00000227507,9606.ENSP00000228872,9606.ENSP00000256078,9606.ENSP00000258149,9606.ENSP00000263826,9606.ENSP00000263967,9606.ENSP00000282111,9606.ENSP00000289153,9606.ENSP00000324806,9606.ENSP00000344456,9606.ENSP00000358404,9606.ENSP00000361021,9606.ENSP00000381185,9606.ENSP00000387784	MAPK1,CCND1,CDKN1B,KRAS,MDM2,AKT3,PIK3CA,TCF7L1,PIK3CB,GSK3B,CTNNB1,TCF7L2,PTEN,BCL2,SOS1
WP4262	Breast cancer pathway	15	153	1.78	2.22e-21	9606.ENSP00000215832,9606.ENSP00000227507,9606.ENSP00000256078,9606.ENSP00000262904,9606.ENSP00000263826,9606.ENSP00000263967,9606.ENSP00000265171,9606.ENSP00000268035,9606.ENSP00000275493,9606.ENSP00000282111,9606.ENSP00000324806,9606.ENSP00000344456,9606.ENSP00000358404,9606.ENSP00000361021,9606.ENSP00000387784	MAPK1,CCND1,KRAS,E2F3,AKT3,PIK3CA,EGF,IGF1R,EGFR,TCF7L1,GSK3B,CTNNB1,TCF7L2,PTEN,SOS1
WP673	ErbB signaling pathway	13	90	1.95	2.57e-20	9606.ENSP00000215832,9606.ENSP00000227507,9606.ENSP00000228872,9606.ENSP00000256078,9606.ENSP00000258149,9606.ENSP00000263826,9606.ENSP00000263967,9606.ENSP00000265171,9606.ENSP00000275493,9606.ENSP00000289153,9606.ENSP00000324806,9606.ENSP00000368880,9606.ENSP00000387784	MAPK1,CCND1,CDKN1B,KRAS,MDM2,AKT3,PIK3CA,EGF,EGFR,PIK3CB,GSK3B,FOXO1,SOS1
WP306	Focal adhesion	14	196	1.64	4.58e-18	9606.ENSP00000215832,9606.ENSP00000227507,9606.ENSP00000263826,9606.ENSP00000263967,9606.ENSP00000265171,9606.ENSP00000268035,9606.ENSP00000275493,9606.ENSP00000289153,9606.ENSP00000324806,9606.ENSP00000344456,9606.ENSP00000346508,9606.ENSP00000361021,9606.ENSP00000381185,9606.ENSP00000387784	MAPK1,CCND1,AKT3,PIK3CA,EGF,IGF1R,EGFR,PIK3CB,GSK3B,CTNNB1,PDGFA,PTEN,BCL2,SOS1
WP4685	Melanoma	11	66	2.01	1.22e-17	9606.ENSP00000215832,9606.ENSP00000227507,9606.ENSP00000256078,9606.ENSP00000258149,9606.ENSP00000262904,9606.ENSP00000263826,9606.ENSP00000263967,9606.ENSP00000289153,9606.ENSP00000361021,9606.ENSP00000387699,9606.ENSP00000387784	MAPK1,CCND1,KRAS,MDM2,E2F3,AKT3,PIK3CA,PIK3CB,PTEN,CREB1,SOS1
WP4659	Gastrin signaling pathway	12	114	1.81	3.34e-17	9606.ENSP00000215832,9606.ENSP00000227507,9606.ENSP00000228872,9606.ENSP00000256078,9606.ENSP00000263967,9606.ENSP00000275493,9606.ENSP00000324806,9606.ENSP00000344456,9606.ENSP00000368880,9606.ENSP00000387699,9606.ENSP00000387784,9606.ENSP00000430684	MAPK1,CCND1,CDKN1B,KRAS,PIK3CA,EGFR,GSK3B,CTNNB1,FOXO1,CREB1,SOS1,IKBKB
WP4658	Small cell lung cancer	11	95	1.85	4.16e-16	9606.ENSP00000227507,9606.ENSP00000228872,9606.ENSP00000262904,9606.ENSP00000263826,9606.ENSP00000263967,9606.ENSP00000266970,9606.ENSP00000289153,9606.ENSP00000361021,9606.ENSP00000381185,9606.ENSP00000429089,9606.ENSP00000430684	CCND1,CDKN1B,E2F3,AKT3,PIK3CA,CDK2,PIK3CB,PTEN,BCL2,CCNE2,IKBKB
WP1984	Integrated breast cancer pathway	12	151	1.69	6.88e-16	9606.ENSP00000215832,9606.ENSP00000227507,9606.ENSP00000256078,9606.ENSP00000258149,9606.ENSP00000263253,9606.ENSP00000266970,9606.ENSP00000275493,9606.ENSP00000344456,9606.ENSP00000361021,9606.ENSP00000368880,9606.ENSP00000381185,9606.ENSP00000387699	MAPK1,CCND1,KRAS,MDM2,EP300,CDK2,EGFR,CTNNB1,PTEN,FOXO1,BCL2,CREB1
WP4666	Hepatitis B infection	12	151	1.69	6.88e-16	9606.ENSP00000215832,9606.ENSP00000256078,9606.ENSP00000263253,9606.ENSP00000263826,9606.ENSP00000263967,9606.ENSP00000289153,9606.ENSP00000329140,9606.ENSP00000350359,9606.ENSP00000381185,9606.ENSP00000387699,9606.ENSP00000387784,9606.ENSP00000430684	MAPK1,KRAS,EP300,AKT3,PIK3CA,PIK3CB,CREB3L2,CREB5,BCL2,CREB1,SOS1,IKBKB
WP3931	Embryonic stem cell pluripotency pathways	11	116	1.76	2.36e-15	9606.ENSP00000215832,9606.ENSP00000258149,9606.ENSP00000263826,9606.ENSP00000265171,9606.ENSP00000275493,9606.ENSP00000324806,9606.ENSP00000344456,9606.ENSP00000346508,9606.ENSP00000361021,9606.ENSP00000387784,9606.ENSP00000410294	MAPK1,MDM2,AKT3,EGF,EGFR,GSK3B,CTNNB1,PDGFA,PTEN,SOS1,FGFR2
WP4255	Non-small cell lung cancer	10	72	1.93	2.36e-15	9606.ENSP00000215832,9606.ENSP00000227507,9606.ENSP00000256078,9606.ENSP00000262904,9606.ENSP00000263826,9606.ENSP00000263967,9606.ENSP00000265171,9606.ENSP00000275493,9606.ENSP00000289153,9606.ENSP00000387784	MAPK1,CCND1,KRAS,E2F3,AKT3,PIK3CA,EGF,EGFR,PIK3CB,SOS1
WP4674	Head and neck squamous cell carcinoma	10	72	1.93	2.36e-15	9606.ENSP00000227507,9606.ENSP00000256078,9606.ENSP00000263826,9606.ENSP00000263967,9606.ENSP00000268035,9606.ENSP00000275493,9606.ENSP00000289153,9606.ENSP00000344456,9606.ENSP00000361021,9606.ENSP00000410294	CCND1,KRAS,AKT3,PIK3CA,IGF1R,EGFR,PIK3CB,CTNNB1,PTEN,FGFR2
WP4263	Pancreatic adenocarcinoma pathway	10	87	1.85	1.15e-14	9606.ENSP00000215832,9606.ENSP00000227507,9606.ENSP00000256078,9606.ENSP00000262904,9606.ENSP00000263826,9606.ENSP00000263967,9606.ENSP00000265171,9606.ENSP00000275493,9606.ENSP00000289153,9606.ENSP00000430684	MAPK1,CCND1,KRAS,E2F3,AKT3,PIK3CA,EGF,EGFR,PIK3CB,IKBKB
WP138	Androgen receptor signaling pathway	10	88	1.84	1.22e-14	9606.ENSP00000227507,9606.ENSP00000258149,9606.ENSP00000263253,9606.ENSP00000275493,9606.ENSP00000306894,9606.ENSP00000324806,9606.ENSP00000344456,9606.ENSP00000361021,9606.ENSP00000368880,9606.ENSP00000387699	CCND1,MDM2,EP300,EGFR,ETV5,GSK3B,CTNNB1,PTEN,FOXO1,CREB1
WP4216	Chromosomal and microsatellite instability in colorectal cancer	9	73	1.88	2.09e-13	9606.ENSP00000215832,9606.ENSP00000227507,9606.ENSP00000256078,9606.ENSP00000263826,9606.ENSP00000282111,9606.ENSP00000324806,9606.ENSP00000344456,9606.ENSP00000358404,9606.ENSP00000381185	MAPK1,CCND1,KRAS,AKT3,TCF7L1,GSK3B,CTNNB1,TCF7L2,BCL2
WP1544	MicroRNAs in cardiomyocyte hypertrophy	9	83	1.82	5.86e-13	9606.ENSP00000215832,9606.ENSP00000263967,9606.ENSP00000265171,9606.ENSP00000268035,9606.ENSP00000289153,9606.ENSP00000324806,9606.ENSP00000344456,9606.ENSP00000410294,9606.ENSP00000430684	MAPK1,PIK3CA,EGF,IGF1R,PIK3CB,GSK3B,CTNNB1,FGFR2,IKBKB
WP3844	PI3K-AKT-mTOR signaling pathway and therapeutic opportunities	7	30	2.15	4.49e-12	9606.ENSP00000228872,9606.ENSP00000256078,9606.ENSP00000263967,9606.ENSP00000289153,9606.ENSP00000324806,9606.ENSP00000361021,9606.ENSP00000368880	CDKN1B,KRAS,PIK3CA,PIK3CB,GSK3B,PTEN,FOXO1
WP3303	RAC1/PAK1/p38/MMP2 pathway	8	67	1.86	8.30e-12	9606.ENSP00000215832,9606.ENSP00000256078,9606.ENSP00000263967,9606.ENSP00000275493,9606.ENSP00000344456,9606.ENSP00000368880,9606.ENSP00000387784,9606.ENSP00000430684	MAPK1,KRAS,PIK3CA,EGFR,CTNNB1,FOXO1,SOS1,IKBKB
WP4223	Ras signaling	10	179	1.53	8.30e-12	9606.ENSP00000215832,9606.ENSP00000256078,9606.ENSP00000263826,9606.ENSP00000263967,9606.ENSP00000268035,9606.ENSP00000275493,9606.ENSP00000289153,9606.ENSP00000387784,9606.ENSP00000410294,9606.ENSP00000430684	MAPK1,KRAS,AKT3,PIK3CA,IGF1R,EGFR,PIK3CB,SOS1,FGFR2,IKBKB
WP2034	Leptin signaling pathway	8	75	1.81	1.85e-11	9606.ENSP00000215832,9606.ENSP00000227507,9606.ENSP00000324806,9606.ENSP00000361021,9606.ENSP00000368880,9606.ENSP00000387699,9606.ENSP00000387784,9606.ENSP00000430684	MAPK1,CCND1,GSK3B,PTEN,FOXO1,CREB1,SOS1,IKBKB
WP2586	Aryl hydrocarbon receptor Netpath	7	46	1.97	5.62e-11	9606.ENSP00000215832,9606.ENSP00000228872,9606.ENSP00000256078,9606.ENSP00000263253,9606.ENSP00000266970,9606.ENSP00000275493,9606.ENSP00000335153	MAPK1,CDKN1B,KRAS,EP300,CDK2,EGFR,HSP90AA1
WP51	Regulation of actin cytoskeleton	9	149	1.57	6.63e-11	9606.ENSP00000215832,9606.ENSP00000256078,9606.ENSP00000263967,9606.ENSP00000265171,9606.ENSP00000275493,9606.ENSP00000289153,9606.ENSP00000346508,9606.ENSP00000387784,9606.ENSP00000410294	MAPK1,KRAS,PIK3CA,EGF,EGFR,PIK3CB,PDGFA,SOS1,FGFR2
WP4539	Synaptic signaling pathways associated with autism spectrum disorder	7	49	1.94	7.85e-11	9606.ENSP00000215832,9606.ENSP00000256078,9606.ENSP00000263826,9606.ENSP00000263967,9606.ENSP00000289153,9606.ENSP00000324806,9606.ENSP00000361021	MAPK1,KRAS,AKT3,PIK3CA,PIK3CB,GSK3B,PTEN
WP4746	Thyroid hormones production and peripheral downstream signaling effects	8	94	1.72	8.73e-11	9606.ENSP00000215832,9606.ENSP00000258149,9606.ENSP00000263826,9606.ENSP00000263967,9606.ENSP00000324806,9606.ENSP00000344456,9606.ENSP00000368880,9606.ENSP00000387784	MAPK1,MDM2,AKT3,PIK3CA,GSK3B,CTNNB1,FOXO1,SOS1
WP481	Insulin signaling	9	159	1.54	1.04e-10	9606.ENSP00000215832,9606.ENSP00000263967,9606.ENSP00000268035,9606.ENSP00000289153,9606.ENSP00000324806,9606.ENSP00000361021,9606.ENSP00000368880,9606.ENSP00000387784,9606.ENSP00000430684	MAPK1,PIK3CA,IGF1R,PIK3CB,GSK3B,PTEN,FOXO1,SOS1,IKBKB
WP4239	Epithelial to mesenchymal transition in colorectal cancer	9	160	1.54	1.07e-10	9606.ENSP00000215832,9606.ENSP00000256078,9606.ENSP00000263826,9606.ENSP00000263967,9606.ENSP00000289153,9606.ENSP00000324806,9606.ENSP00000344456,9606.ENSP00000354487,9606.ENSP00000387784	MAPK1,KRAS,AKT3,PIK3CA,PIK3CB,GSK3B,CTNNB1,ZEB1,SOS1
WP4483	Relationship between inflammation, COX-2 and EGFR	6	25	2.17	1.69e-10	9606.ENSP00000215832,9606.ENSP00000256078,9606.ENSP00000263826,9606.ENSP00000263967,9606.ENSP00000275493,9606.ENSP00000289153	MAPK1,KRAS,AKT3,PIK3CA,EGFR,PIK3CB
WP45	G1 to S cell cycle control	7	64	1.83	3.78e-10	9606.ENSP00000227507,9606.ENSP00000228872,9606.ENSP00000258149,9606.ENSP00000262904,9606.ENSP00000266970,9606.ENSP00000387699,9606.ENSP00000429089	CCND1,CDKN1B,MDM2,E2F3,CDK2,CREB1,CCNE2
WP179	Cell cycle	8	119	1.61	4.45e-10	9606.ENSP00000227507,9606.ENSP00000228872,9606.ENSP00000258149,9606.ENSP00000262904,9606.ENSP00000263253,9606.ENSP00000266970,9606.ENSP00000324806,9606.ENSP00000429089	CCND1,CDKN1B,MDM2,E2F3,EP300,CDK2,GSK3B,CCNE2
WP2828	Bladder cancer	6	40	1.96	1.94e-09	9606.ENSP00000215832,9606.ENSP00000227507,9606.ENSP00000256078,9606.ENSP00000258149,9606.ENSP00000265171,9606.ENSP00000275493	MAPK1,CCND1,KRAS,MDM2,EGF,EGFR
WP382	MAPK signaling pathway	9	245	1.35	3.55e-09	9606.ENSP00000215832,9606.ENSP00000256078,9606.ENSP00000263826,9606.ENSP00000265171,9606.ENSP00000275493,9606.ENSP00000346508,9606.ENSP00000387784,9606.ENSP00000410294,9606.ENSP00000430684	MAPK1,KRAS,AKT3,EGF,EGFR,PDGFA,SOS1,FGFR2,IKBKB
WP437	EGF/EGFR signaling pathway	8	162	1.48	4.27e-09	9606.ENSP00000215832,9606.ENSP00000256078,9606.ENSP00000265171,9606.ENSP00000275493,9606.ENSP00000361021,9606.ENSP00000368880,9606.ENSP00000387699,9606.ENSP00000387784	MAPK1,KRAS,EGF,EGFR,PTEN,FOXO1,CREB1,SOS1
WP3929	Chemokine signaling pathway	8	164	1.47	4.57e-09	9606.ENSP00000215832,9606.ENSP00000256078,9606.ENSP00000263826,9606.ENSP00000263967,9606.ENSP00000289153,9606.ENSP00000324806,9606.ENSP00000387784,9606.ENSP00000430684	MAPK1,KRAS,AKT3,PIK3CA,PIK3CB,GSK3B,SOS1,IKBKB
WP23	B cell receptor signaling pathway	7	97	1.64	4.94e-09	9606.ENSP00000215832,9606.ENSP00000262904,9606.ENSP00000324806,9606.ENSP00000368880,9606.ENSP00000387699,9606.ENSP00000387784,9606.ENSP00000430684	MAPK1,E2F3,GSK3B,FOXO1,CREB1,SOS1,IKBKB
WP3286	Copper homeostasis	6	51	1.86	6.53e-09	9606.ENSP00000227507,9606.ENSP00000258149,9606.ENSP00000263967,9606.ENSP00000324806,9606.ENSP00000361021,9606.ENSP00000368880	CCND1,MDM2,PIK3CA,GSK3B,PTEN,FOXO1
WP615	Senescence and autophagy in cancer	7	105	1.61	7.95e-09	9606.ENSP00000215832,9606.ENSP00000228872,9606.ENSP00000258149,9606.ENSP00000268035,9606.ENSP00000324806,9606.ENSP00000361021,9606.ENSP00000381185	MAPK1,CDKN1B,MDM2,IGF1R,GSK3B,PTEN,BCL2
WP4205	MET in type 1 papillary renal cell carcinoma	6	58	1.8	1.26e-08	9606.ENSP00000215832,9606.ENSP00000256078,9606.ENSP00000263826,9606.ENSP00000263967,9606.ENSP00000289153,9606.ENSP00000387784	MAPK1,KRAS,AKT3,PIK3CA,PIK3CB,SOS1
WP712	Estrogen signaling pathway	5	23	2.12	1.26e-08	9606.ENSP00000215832,9606.ENSP00000263967,9606.ENSP00000381185,9606.ENSP00000387699,9606.ENSP00000430684	MAPK1,PIK3CA,BCL2,CREB1,IKBKB
WP3888	VEGFA-VEGFR2 signaling pathway	10	428	1.15	1.76e-08	9606.ENSP00000215832,9606.ENSP00000227507,9606.ENSP00000258149,9606.ENSP00000263967,9606.ENSP00000324806,9606.ENSP00000335153,9606.ENSP00000344456,9606.ENSP00000368880,9606.ENSP00000381185,9606.ENSP00000387699	MAPK1,CCND1,MDM2,PIK3CA,GSK3B,HSP90AA1,CTNNB1,FOXO1,BCL2,CREB1
WP2374	Oncostatin M signaling pathway	6	65	1.75	2.26e-08	9606.ENSP00000215832,9606.ENSP00000228872,9606.ENSP00000256078,9606.ENSP00000266970,9606.ENSP00000387699,9606.ENSP00000387784	MAPK1,CDKN1B,KRAS,CDK2,CREB1,SOS1
WP2032	Thyroid stimulating hormone (TSH) signaling pathway	6	66	1.74	2.41e-08	9606.ENSP00000215832,9606.ENSP00000228872,9606.ENSP00000263967,9606.ENSP00000266970,9606.ENSP00000268035,9606.ENSP00000387699	MAPK1,CDKN1B,PIK3CA,CDK2,IGF1R,CREB1
WP3680	Physico-chemical features and toxicity-associated pathways	6	66	1.74	2.41e-08	9606.ENSP00000215832,9606.ENSP00000228872,9606.ENSP00000275493,9606.ENSP00000324806,9606.ENSP00000344456,9606.ENSP00000387784	MAPK1,CDKN1B,EGFR,GSK3B,CTNNB1,SOS1
WP707	DNA damage response	6	67	1.74	2.52e-08	9606.ENSP00000227507,9606.ENSP00000228872,9606.ENSP00000258149,9606.ENSP00000266970,9606.ENSP00000387699,9606.ENSP00000429089	CCND1,CDKN1B,MDM2,CDK2,CREB1,CCNE2
WP2643	Nanoparticle-mediated activation of receptor signaling	5	28	2.04	2.61e-08	9606.ENSP00000215832,9606.ENSP00000256078,9606.ENSP00000263826,9606.ENSP00000275493,9606.ENSP00000387784	MAPK1,KRAS,AKT3,EGFR,SOS1
WP1530	miRNA regulation of DNA damage response	6	70	1.72	3.09e-08	9606.ENSP00000227507,9606.ENSP00000228872,9606.ENSP00000258149,9606.ENSP00000266970,9606.ENSP00000387699,9606.ENSP00000429089	CCND1,CDKN1B,MDM2,CDK2,CREB1,CCNE2
WP4481	Resistin as a regulator of inflammation	5	33	1.97	5.27e-08	9606.ENSP00000215832,9606.ENSP00000263826,9606.ENSP00000263967,9606.ENSP00000289153,9606.ENSP00000430684	MAPK1,AKT3,PIK3CA,PIK3CB,IKBKB
WP4844	Influence of laminopathies on Wnt signaling	5	35	1.94	6.76e-08	9606.ENSP00000227507,9606.ENSP00000282111,9606.ENSP00000324806,9606.ENSP00000344456,9606.ENSP00000358404	CCND1,TCF7L1,GSK3B,CTNNB1,TCF7L2
WP4298	Acute viral myocarditis	6	86	1.63	9.35e-08	9606.ENSP00000215832,9606.ENSP00000227507,9606.ENSP00000324806,9606.ENSP00000381185,9606.ENSP00000387699,9606.ENSP00000387784	MAPK1,CCND1,GSK3B,BCL2,CREB1,SOS1
WP5098	T-cell activation SARS-CoV-2	6	86	1.63	9.35e-08	9606.ENSP00000215832,9606.ENSP00000227507,9606.ENSP00000324806,9606.ENSP00000361021,9606.ENSP00000387784,9606.ENSP00000430684	MAPK1,CCND1,GSK3B,PTEN,SOS1,IKBKB
WP5124	Alzheimers disease	8	255	1.28	9.35e-08	9606.ENSP00000215832,9606.ENSP00000256078,9606.ENSP00000263826,9606.ENSP00000263967,9606.ENSP00000289153,9606.ENSP00000324806,9606.ENSP00000344456,9606.ENSP00000430684	MAPK1,KRAS,AKT3,PIK3CA,PIK3CB,GSK3B,CTNNB1,IKBKB
WP2446	Retinoblastoma gene in cancer	6	87	1.62	9.46e-08	9606.ENSP00000227507,9606.ENSP00000228872,9606.ENSP00000258149,9606.ENSP00000262904,9606.ENSP00000266970,9606.ENSP00000429089	CCND1,CDKN1B,MDM2,E2F3,CDK2,CCNE2
WP2059	Alzheimers disease and miRNA effects	8	258	1.28	9.62e-08	9606.ENSP00000215832,9606.ENSP00000256078,9606.ENSP00000263826,9606.ENSP00000263967,9606.ENSP00000289153,9606.ENSP00000324806,9606.ENSP00000344456,9606.ENSP00000430684	MAPK1,KRAS,AKT3,PIK3CA,PIK3CB,GSK3B,CTNNB1,IKBKB
WP127	IL-5 signaling pathway	5	40	1.88	1.12e-07	9606.ENSP00000215832,9606.ENSP00000256078,9606.ENSP00000324806,9606.ENSP00000381185,9606.ENSP00000387784	MAPK1,KRAS,GSK3B,BCL2,SOS1
WP2355	Corticotropin-releasing hormone signaling pathway	6	91	1.61	1.16e-07	9606.ENSP00000215832,9606.ENSP00000324806,9606.ENSP00000335153,9606.ENSP00000344456,9606.ENSP00000381185,9606.ENSP00000387699	MAPK1,GSK3B,HSP90AA1,CTNNB1,BCL2,CREB1
WP1971	Integrated cancer pathway	5	44	1.84	1.69e-07	9606.ENSP00000228872,9606.ENSP00000258149,9606.ENSP00000266970,9606.ENSP00000361021,9606.ENSP00000381185	CDKN1B,MDM2,CDK2,PTEN,BCL2
WP4540	Hippo signaling regulation pathways	6	98	1.57	1.71e-07	9606.ENSP00000268035,9606.ENSP00000275493,9606.ENSP00000282111,9606.ENSP00000344456,9606.ENSP00000358404,9606.ENSP00000410294	IGF1R,EGFR,TCF7L1,CTNNB1,TCF7L2,FGFR2
WP399	Wnt signaling pathway and pluripotency	6	101	1.56	2.00e-07	9606.ENSP00000227507,9606.ENSP00000263253,9606.ENSP00000282111,9606.ENSP00000324806,9606.ENSP00000344456,9606.ENSP00000358404	CCND1,EP300,TCF7L1,GSK3B,CTNNB1,TCF7L2
WP3853	ERK pathway in Huntingtons disease	4	15	2.21	2.36e-07	9606.ENSP00000215832,9606.ENSP00000265171,9606.ENSP00000275493,9606.ENSP00000387699	MAPK1,EGF,EGFR,CREB1
WP4872	MAP3K1 role in promoting and blocking gonadal determination	4	16	2.18	2.90e-07	9606.ENSP00000215832,9606.ENSP00000324806,9606.ENSP00000344456,9606.ENSP00000410294	MAPK1,GSK3B,CTNNB1,FGFR2
WP363	Wnt signaling pathway	5	51	1.78	3.09e-07	9606.ENSP00000215832,9606.ENSP00000227507,9606.ENSP00000324806,9606.ENSP00000344456,9606.ENSP00000358404	MAPK1,CCND1,GSK3B,CTNNB1,TCF7L2
WP2795	Cardiac hypertrophic response	5	54	1.75	3.98e-07	9606.ENSP00000215832,9606.ENSP00000265171,9606.ENSP00000324806,9606.ENSP00000410294,9606.ENSP00000430684	MAPK1,EGF,GSK3B,FGFR2,IKBKB
WP395	IL-4 signaling pathway	5	54	1.75	3.98e-07	9606.ENSP00000215832,9606.ENSP00000263253,9606.ENSP00000263967,9606.ENSP00000387784,9606.ENSP00000430684	MAPK1,EP300,PIK3CA,SOS1,IKBKB
WP4541	Hippo-Merlin signaling dysregulation	6	119	1.49	4.64e-07	9606.ENSP00000227507,9606.ENSP00000256078,9606.ENSP00000268035,9606.ENSP00000275493,9606.ENSP00000344456,9606.ENSP00000410294	CCND1,KRAS,IGF1R,EGFR,CTNNB1,FGFR2
WP4549	Fragile X syndrome	6	119	1.49	4.64e-07	9606.ENSP00000215832,9606.ENSP00000256078,9606.ENSP00000289153,9606.ENSP00000361021,9606.ENSP00000387699,9606.ENSP00000387784	MAPK1,KRAS,PIK3CB,PTEN,CREB1,SOS1
WP4217	Ebola virus pathway in host	6	129	1.45	7.14e-07	9606.ENSP00000215832,9606.ENSP00000263253,9606.ENSP00000263967,9606.ENSP00000268035,9606.ENSP00000275493,9606.ENSP00000289153	MAPK1,EP300,PIK3CA,IGF1R,EGFR,PIK3CB
WP3915	Angiopoietin-like protein 8 regulatory pathway	6	130	1.45	7.35e-07	9606.ENSP00000215832,9606.ENSP00000263967,9606.ENSP00000289153,9606.ENSP00000324806,9606.ENSP00000368880,9606.ENSP00000387784	MAPK1,PIK3CA,PIK3CB,GSK3B,FOXO1,SOS1
WP205	IL-7 signaling pathway	4	25	1.99	1.25e-06	9606.ENSP00000215832,9606.ENSP00000227507,9606.ENSP00000228872,9606.ENSP00000324806	MAPK1,CCND1,CDKN1B,GSK3B
WP2037	Prolactin signaling pathway	5	76	1.6	1.80e-06	9606.ENSP00000215832,9606.ENSP00000263967,9606.ENSP00000289153,9606.ENSP00000324806,9606.ENSP00000387784	MAPK1,PIK3CA,PIK3CB,GSK3B,SOS1
WP2112	IL-17 signaling pathway	4	32	1.88	2.98e-06	9606.ENSP00000215832,9606.ENSP00000263967,9606.ENSP00000324806,9606.ENSP00000430684	MAPK1,PIK3CA,GSK3B,IKBKB
WP2839	Hair follicle development: organogenesis - part 2 of 3	4	32	1.88	2.98e-06	9606.ENSP00000227507,9606.ENSP00000344456,9606.ENSP00000346508,9606.ENSP00000410294	CCND1,CTNNB1,PDGFA,FGFR2
WP3995	Prion disease pathway	4	32	1.88	2.98e-06	9606.ENSP00000215832,9606.ENSP00000263253,9606.ENSP00000381185,9606.ENSP00000387699	MAPK1,EP300,BCL2,CREB1
WP4186	Somatroph axis (GH) and its relationship to dietary restriction and aging	3	6	2.49	2.98e-06	9606.ENSP00000268035,9606.ENSP00000361021,9606.ENSP00000368880	IGF1R,PTEN,FOXO1
WP4336	ncRNAs involved in Wnt signaling in hepatocellular carcinoma	5	85	1.56	2.98e-06	9606.ENSP00000227507,9606.ENSP00000282111,9606.ENSP00000324806,9606.ENSP00000344456,9606.ENSP00000358404	CCND1,TCF7L1,GSK3B,CTNNB1,TCF7L2
WP3676	BDNF-TrkB signaling	4	33	1.87	3.15e-06	9606.ENSP00000215832,9606.ENSP00000256078,9606.ENSP00000387699,9606.ENSP00000387784	MAPK1,KRAS,CREB1,SOS1
WP313	Hepatocyte growth factor receptor signaling	4	34	1.86	3.48e-06	9606.ENSP00000215832,9606.ENSP00000263967,9606.ENSP00000361021,9606.ENSP00000387784	MAPK1,PIK3CA,PTEN,SOS1
WP231	TNF-alpha signaling pathway	5	92	1.52	4.01e-06	9606.ENSP00000215832,9606.ENSP00000256078,9606.ENSP00000335153,9606.ENSP00000387784,9606.ENSP00000430684	MAPK1,KRAS,HSP90AA1,SOS1,IKBKB
WP4258	lncRNA in canonical Wnt signaling and colorectal cancer	5	93	1.52	4.17e-06	9606.ENSP00000227507,9606.ENSP00000282111,9606.ENSP00000324806,9606.ENSP00000344456,9606.ENSP00000358404	CCND1,TCF7L1,GSK3B,CTNNB1,TCF7L2
WP4829	mBDNF and proBDNF regulation of GABA neurotransmission	4	38	1.81	5.06e-06	9606.ENSP00000263967,9606.ENSP00000289153,9606.ENSP00000361021,9606.ENSP00000387699	PIK3CA,PIK3CB,PTEN,CREB1
WP4871	Kisspeptin/kisspeptin receptor system in the ovary	4	39	1.8	5.51e-06	9606.ENSP00000215832,9606.ENSP00000256078,9606.ENSP00000263967,9606.ENSP00000289153	MAPK1,KRAS,PIK3CA,PIK3CB
WP75	Toll-like receptor signaling pathway	5	103	1.47	6.53e-06	9606.ENSP00000215832,9606.ENSP00000263826,9606.ENSP00000263967,9606.ENSP00000289153,9606.ENSP00000430684	MAPK1,AKT3,PIK3CA,PIK3CB,IKBKB
WP2036	TNF-related weak inducer of apoptosis (TWEAK) signaling pathway	4	42	1.77	7.09e-06	9606.ENSP00000215832,9606.ENSP00000324806,9606.ENSP00000344456,9606.ENSP00000430684	MAPK1,GSK3B,CTNNB1,IKBKB
WP4321	Thermogenesis	5	108	1.45	7.99e-06	9606.ENSP00000256078,9606.ENSP00000329140,9606.ENSP00000350359,9606.ENSP00000387699,9606.ENSP00000387784	KRAS,CREB3L2,CREB5,CREB1,SOS1
WP2332	Interleukin-11 signaling pathway	4	44	1.74	8.25e-06	9606.ENSP00000215832,9606.ENSP00000381185,9606.ENSP00000387699,9606.ENSP00000430684	MAPK1,BCL2,CREB1,IKBKB
WP4566	Translation inhibitors in chronically activated PDGFRA cells	4	45	1.74	8.87e-06	9606.ENSP00000215832,9606.ENSP00000263826,9606.ENSP00000263967,9606.ENSP00000289153	MAPK1,AKT3,PIK3CA,PIK3CB
WP2873	Aryl hydrocarbon receptor pathway	4	46	1.73	9.53e-06	9606.ENSP00000228872,9606.ENSP00000263253,9606.ENSP00000275493,9606.ENSP00000335153	CDKN1B,EP300,EGFR,HSP90AA1
WP428	Wnt signaling	5	114	1.43	9.87e-06	9606.ENSP00000227507,9606.ENSP00000282111,9606.ENSP00000324806,9606.ENSP00000344456,9606.ENSP00000358404	CCND1,TCF7L1,GSK3B,CTNNB1,TCF7L2
WP1541	Energy metabolism	4	47	1.72	1.01e-05	9606.ENSP00000263253,9606.ENSP00000324806,9606.ENSP00000368880,9606.ENSP00000387699	EP300,GSK3B,FOXO1,CREB1
WP2431	Spinal cord injury	5	116	1.42	1.05e-05	9606.ENSP00000215832,9606.ENSP00000227507,9606.ENSP00000228872,9606.ENSP00000266970,9606.ENSP00000275493	MAPK1,CCND1,CDKN1B,CDK2,EGFR
WP4787	Osteoblast differentiation and related diseases	5	118	1.41	1.13e-05	9606.ENSP00000215832,9606.ENSP00000263967,9606.ENSP00000289153,9606.ENSP00000344456,9606.ENSP00000410294	MAPK1,PIK3CA,PIK3CB,CTNNB1,FGFR2
WP3611	Photodynamic therapy-induced AP-1 survival signaling.	4	50	1.69	1.23e-05	9606.ENSP00000227507,9606.ENSP00000275493,9606.ENSP00000335153,9606.ENSP00000381185	CCND1,EGFR,HSP90AA1,BCL2
WP4879	Overlap between signal transduction pathways contributing to LMNA laminopathies	4	55	1.65	1.75e-05	9606.ENSP00000282111,9606.ENSP00000324806,9606.ENSP00000344456,9606.ENSP00000358404	TCF7L1,GSK3B,CTNNB1,TCF7L2
WP366	TGF-beta signaling pathway	5	132	1.36	1.86e-05	9606.ENSP00000215832,9606.ENSP00000227507,9606.ENSP00000263253,9606.ENSP00000354487,9606.ENSP00000387784	MAPK1,CCND1,EP300,ZEB1,SOS1
WP1545	miRNAs involved in DNA damage response	3	15	2.09	2.17e-05	9606.ENSP00000227507,9606.ENSP00000228872,9606.ENSP00000387699	CCND1,CDKN1B,CREB1
WP304	Kit receptor signaling pathway	4	59	1.62	2.21e-05	9606.ENSP00000215832,9606.ENSP00000263253,9606.ENSP00000381185,9606.ENSP00000387784	MAPK1,EP300,BCL2,SOS1
WP1449	Regulation of toll-like receptor signaling pathway	5	139	1.34	2.30e-05	9606.ENSP00000215832,9606.ENSP00000263826,9606.ENSP00000263967,9606.ENSP00000289153,9606.ENSP00000430684	MAPK1,AKT3,PIK3CA,PIK3CB,IKBKB
WP3863	T-cell antigen receptor (TCR) pathway during Staphylococcus aureus infection	4	60	1.61	2.31e-05	9606.ENSP00000263967,9606.ENSP00000324806,9606.ENSP00000387784,9606.ENSP00000430684	PIK3CA,GSK3B,SOS1,IKBKB
WP2380	Brain-derived neurotrophic factor (BDNF) signaling pathway	5	143	1.33	2.58e-05	9606.ENSP00000215832,9606.ENSP00000324806,9606.ENSP00000344456,9606.ENSP00000387699,9606.ENSP00000430684	MAPK1,GSK3B,CTNNB1,CREB1,IKBKB
WP2324	AGE/RAGE pathway	4	66	1.57	3.21e-05	9606.ENSP00000215832,9606.ENSP00000275493,9606.ENSP00000368880,9606.ENSP00000430684	MAPK1,EGFR,FOXO1,IKBKB
WP4754	IL-18 signaling pathway	6	270	1.13	3.21e-05	9606.ENSP00000215832,9606.ENSP00000324806,9606.ENSP00000344456,9606.ENSP00000361021,9606.ENSP00000381185,9606.ENSP00000430684	MAPK1,GSK3B,CTNNB1,PTEN,BCL2,IKBKB
WP4300	Extracellular vesicles in the crosstalk of cardiac cells	3	18	2.01	3.30e-05	9606.ENSP00000265171,9606.ENSP00000275493,9606.ENSP00000361021	EGF,EGFR,PTEN
WP4396	Nonalcoholic fatty liver disease	5	155	1.29	3.64e-05	9606.ENSP00000263826,9606.ENSP00000263967,9606.ENSP00000289153,9606.ENSP00000324806,9606.ENSP00000430684	AKT3,PIK3CA,PIK3CB,GSK3B,IKBKB
WP3657	Hematopoietic stem cell gene regulation by GABP alpha/beta complex	3	20	1.96	4.30e-05	9606.ENSP00000263253,9606.ENSP00000361021,9606.ENSP00000381185	EP300,PTEN,BCL2
WP262	Ebstein-Barr virus LMP1 signaling	3	23	1.9	6.23e-05	9606.ENSP00000215832,9606.ENSP00000335153,9606.ENSP00000430684	MAPK1,HSP90AA1,IKBKB
WP1539	Angiogenesis	3	24	1.88	6.94e-05	9606.ENSP00000215832,9606.ENSP00000263967,9606.ENSP00000410294	MAPK1,PIK3CA,FGFR2
WP2882	Nuclear receptors meta-pathway	6	316	1.06	7.25e-05	9606.ENSP00000227507,9606.ENSP00000228872,9606.ENSP00000263253,9606.ENSP00000275493,9606.ENSP00000335153,9606.ENSP00000368880	CCND1,CDKN1B,EP300,EGFR,HSP90AA1,FOXO1
WP254	Apoptosis	4	84	1.46	7.50e-05	9606.ENSP00000258149,9606.ENSP00000268035,9606.ENSP00000381185,9606.ENSP00000430684	MDM2,IGF1R,BCL2,IKBKB
WP4018	Clear cell renal cell carcinoma pathways	4	85	1.46	7.78e-05	9606.ENSP00000263253,9606.ENSP00000275493,9606.ENSP00000354487,9606.ENSP00000361021	EP300,EGFR,ZEB1,PTEN
WP3658	Wnt/beta-catenin signaling pathway in leukemia	3	26	1.85	8.35e-05	9606.ENSP00000227507,9606.ENSP00000324806,9606.ENSP00000344456	CCND1,GSK3B,CTNNB1
WP69	T-cell receptor (TCR) signaling pathway	4	89	1.44	9.10e-05	9606.ENSP00000215832,9606.ENSP00000387699,9606.ENSP00000387784,9606.ENSP00000430684	MAPK1,CREB1,SOS1,IKBKB
WP2035	Follicle stimulating hormone (FSH) signaling pathway	3	27	1.83	9.11e-05	9606.ENSP00000215832,9606.ENSP00000368880,9606.ENSP00000387699	MAPK1,FOXO1,CREB1
WP2870	Extracellular vesicle-mediated signaling in recipient cells	3	30	1.79	0.00012	9606.ENSP00000256078,9606.ENSP00000275493,9606.ENSP00000344456	KRAS,EGFR,CTNNB1
WP2064	Neural crest differentiation	4	100	1.39	0.00014	9606.ENSP00000282111,9606.ENSP00000324806,9606.ENSP00000344456,9606.ENSP00000410294	TCF7L1,GSK3B,CTNNB1,FGFR2
WP4149	White fat cell differentiation	3	32	1.76	0.00014	9606.ENSP00000282111,9606.ENSP00000368880,9606.ENSP00000387699	TCF7L1,FOXO1,CREB1
WP422	MAPK cascade	3	33	1.74	0.00015	9606.ENSP00000215832,9606.ENSP00000256078,9606.ENSP00000387784	MAPK1,KRAS,SOS1
WP4874	CAMKK2 pathway	3	33	1.74	0.00015	9606.ENSP00000215832,9606.ENSP00000263253,9606.ENSP00000387699	MAPK1,EP300,CREB1
WP3850	Factors and pathways affecting insulin-like growth factor (IGF1)-Akt signaling	3	35	1.72	0.00018	9606.ENSP00000268035,9606.ENSP00000324806,9606.ENSP00000361021	IGF1R,GSK3B,PTEN
WP2516	ATM signaling pathway	3	39	1.67	0.00024	9606.ENSP00000258149,9606.ENSP00000266970,9606.ENSP00000387699	MDM2,CDK2,CREB1
WP4564	Neural crest cell migration during development	3	39	1.67	0.00024	9606.ENSP00000263826,9606.ENSP00000263967,9606.ENSP00000289153	AKT3,PIK3CA,PIK3CB
WP2526	PDGF pathway	3	40	1.66	0.00025	9606.ENSP00000215832,9606.ENSP00000346508,9606.ENSP00000387784	MAPK1,PDGFA,SOS1
WP2868	TCA cycle nutrient use and invasiveness of ovarian cancer	2	5	2.39	0.00029	9606.ENSP00000215832,9606.ENSP00000275493	MAPK1,EGFR
WP4565	Neural crest cell migration in cancer	3	42	1.64	0.00029	9606.ENSP00000263826,9606.ENSP00000263967,9606.ENSP00000289153	AKT3,PIK3CA,PIK3CB
WP4756	Renin-angiotensin-aldosterone system (RAAS)	3	42	1.64	0.00029	9606.ENSP00000329140,9606.ENSP00000350359,9606.ENSP00000387699	CREB3L2,CREB5,CREB1
WP49	IL-2 signaling pathway	3	42	1.64	0.00029	9606.ENSP00000215832,9606.ENSP00000381185,9606.ENSP00000387784	MAPK1,BCL2,SOS1
WP364	IL-6 signaling pathway	3	43	1.63	0.00030	9606.ENSP00000215832,9606.ENSP00000324806,9606.ENSP00000387784	MAPK1,GSK3B,SOS1
WP2038	Microtubule cytoskeleton regulation	3	46	1.6	0.00036	9606.ENSP00000263967,9606.ENSP00000324806,9606.ENSP00000361021	PIK3CA,GSK3B,PTEN
WP4535	Envelope proteins and their potential roles in EDMD physiopathology	3	46	1.6	0.00036	9606.ENSP00000215832,9606.ENSP00000256078,9606.ENSP00000387784	MAPK1,KRAS,SOS1
WP286	IL-3 signaling pathway	3	49	1.57	0.00042	9606.ENSP00000215832,9606.ENSP00000381185,9606.ENSP00000387784	MAPK1,BCL2,SOS1
WP4971	Phosphoinositides metabolism	3	49	1.57	0.00042	9606.ENSP00000263967,9606.ENSP00000289153,9606.ENSP00000361021	PIK3CA,PIK3CB,PTEN
WP4673	Male infertility	4	141	1.24	0.00044	9606.ENSP00000258149,9606.ENSP00000263253,9606.ENSP00000306894,9606.ENSP00000381185	MDM2,EP300,ETV5,BCL2
WP560	TGF-beta receptor signaling	3	54	1.53	0.00054	9606.ENSP00000263253,9606.ENSP00000265171,9606.ENSP00000344456	EP300,EGF,CTNNB1
WP4816	TGF-beta receptor signaling in skeletal dysplasias	3	58	1.5	0.00066	9606.ENSP00000263253,9606.ENSP00000265171,9606.ENSP00000344456	EP300,EGF,CTNNB1
WP5053	Development of ureteric collection system	3	60	1.49	0.00072	9606.ENSP00000227507,9606.ENSP00000344456,9606.ENSP00000410294	CCND1,CTNNB1,FGFR2
WP61	Notch signaling pathway (Netpath)	3	61	1.48	0.00075	9606.ENSP00000227507,9606.ENSP00000263253,9606.ENSP00000324806	CCND1,EP300,GSK3B
WP3651	Pathways affected in adenoid cystic carcinoma	3	64	1.46	0.00085	9606.ENSP00000263253,9606.ENSP00000263967,9606.ENSP00000361021	EP300,PIK3CA,PTEN
WP2877	Vitamin D receptor pathway	4	182	1.13	0.0011	9606.ENSP00000227507,9606.ENSP00000228872,9606.ENSP00000266970,9606.ENSP00000368880	CCND1,CDKN1B,CDK2,FOXO1
WP3849	MAPK and NFkB signaling pathways inhibited by Yersinia YopJ	2	12	2.01	0.0011	9606.ENSP00000215832,9606.ENSP00000430684	MAPK1,IKBKB
WP4341	Non-genomic actions of 1,25 dihydroxyvitamin D3	3	71	1.41	0.0011	9606.ENSP00000215832,9606.ENSP00000256078,9606.ENSP00000430684	MAPK1,KRAS,IKBKB
WP1434	Osteopontin signaling	2	13	1.97	0.0012	9606.ENSP00000215832,9606.ENSP00000430684	MAPK1,IKBKB
WP2118	Arrhythmogenic right ventricular cardiomyopathy	3	74	1.39	0.0012	9606.ENSP00000282111,9606.ENSP00000344456,9606.ENSP00000358404	TCF7L1,CTNNB1,TCF7L2
WP2814	Mammary gland development pathway - Puberty (Stage 2 of 4)	2	13	1.97	0.0012	9606.ENSP00000227507,9606.ENSP00000265171	CCND1,EGF
WP3301	MFAP5-mediated ovarian cancer cell motility and invasiveness	2	13	1.97	0.0012	9606.ENSP00000215832,9606.ENSP00000387699	MAPK1,CREB1
WP3584	MECP2 and associated Rett syndrome	3	72	1.41	0.0012	9606.ENSP00000268035,9606.ENSP00000361021,9606.ENSP00000387699	IGF1R,PTEN,CREB1
WP3876	BMP2-WNT4-FOXO1 pathway in primary endometrial stromal cell differentiation	2	13	1.97	0.0012	9606.ENSP00000344456,9606.ENSP00000368880	CTNNB1,FOXO1
WP3594	Circadian rhythm genes	4	199	1.09	0.0014	9606.ENSP00000263253,9606.ENSP00000324806,9606.ENSP00000361021,9606.ENSP00000387699	EP300,GSK3B,PTEN,CREB1
WP3969	H19 action Rb-E2F1 signaling and CDK-Beta-catenin activity	2	14	1.94	0.0014	9606.ENSP00000227507,9606.ENSP00000344456	CCND1,CTNNB1
WP4582	Cancer immunotherapy by CTLA4 blockade	2	14	1.94	0.0014	9606.ENSP00000263967,9606.ENSP00000289153	PIK3CA,PIK3CB
WP4928	MAPK pathway in congenital thyroid cancer	2	16	1.88	0.0017	9606.ENSP00000256078,9606.ENSP00000387784	KRAS,SOS1
WP3664	Regulation of Wnt / B-catenin signaling by small molecule compounds	2	17	1.86	0.0019	9606.ENSP00000324806,9606.ENSP00000344456	GSK3B,CTNNB1
WP3678	Amplification and expansion of oncogenic pathways as metastatic traits	2	17	1.86	0.0019	9606.ENSP00000282111,9606.ENSP00000358404	TCF7L1,TCF7L2
WP4301	Inhibition of exosome biogenesis and secretion by Manumycin A in CRPC cells	2	18	1.83	0.0021	9606.ENSP00000215832,9606.ENSP00000256078	MAPK1,KRAS
WP4560	MFAP5 effect on permeability and motility of endothelial cells via cytoskeleton rearrangement	2	18	1.83	0.0021	9606.ENSP00000215832,9606.ENSP00000387699	MAPK1,CREB1
WP1742	TP53 network	2	19	1.81	0.0023	9606.ENSP00000258149,9606.ENSP00000381185	MDM2,BCL2
WP3287	Overview of nanoparticle effects	2	19	1.81	0.0023	9606.ENSP00000263826,9606.ENSP00000381185	AKT3,BCL2
WP734	Serotonin receptor 4/6/7 and NR3C signaling	2	19	1.81	0.0023	9606.ENSP00000215832,9606.ENSP00000387699	MAPK1,CREB1
WP3927	BMP signaling in eyelid development	2	20	1.79	0.0025	9606.ENSP00000275493,9606.ENSP00000410294	EGFR,FGFR2
WP732	Serotonin receptor 2 and ELK-SRF/GATA4 signaling	2	20	1.79	0.0025	9606.ENSP00000215832,9606.ENSP00000256078	MAPK1,KRAS
WP185	Integrin-mediated cell adhesion	3	100	1.26	0.0026	9606.ENSP00000215832,9606.ENSP00000263826,9606.ENSP00000387784	MAPK1,AKT3,SOS1
WP4970	Galanin receptor pathway	2	21	1.77	0.0026	9606.ENSP00000228872,9606.ENSP00000387699	CDKN1B,CREB1
WP1584	Type II diabetes mellitus	2	22	1.74	0.0029	9606.ENSP00000215832,9606.ENSP00000430684	MAPK1,IKBKB
WP3599	Transcription factor regulation in adipogenesis	2	22	1.74	0.0029	9606.ENSP00000368880,9606.ENSP00000387699	FOXO1,CREB1
WP3872	Regulation of apoptosis by parathyroid hormone-related protein	2	22	1.74	0.0029	9606.ENSP00000324806,9606.ENSP00000381185	GSK3B,BCL2
WP4141	PI3K/AKT/mTOR - VitD3 signaling	2	22	1.74	0.0029	9606.ENSP00000263967,9606.ENSP00000324806	PIK3CA,GSK3B
WP4790	FGF23 signaling in hypophosphatemic rickets and related disorders	2	22	1.74	0.0029	9606.ENSP00000227507,9606.ENSP00000410294	CCND1,FGFR2
WP4357	NRF2-ARE regulation	2	23	1.73	0.0030	9606.ENSP00000263967,9606.ENSP00000324806	PIK3CA,GSK3B
WP3982	miRNA regulation of p53 pathway in prostate cancer	2	24	1.71	0.0032	9606.ENSP00000258149,9606.ENSP00000361021	MDM2,PTEN
WP4842	Mammalian disorder of sexual development	2	24	1.71	0.0032	9606.ENSP00000344456,9606.ENSP00000410294	CTNNB1,FGFR2
WP5074	Kallmann syndrome	2	24	1.71	0.0032	9606.ENSP00000215832,9606.ENSP00000263967	MAPK1,PIK3CA
WP26	S1P receptor signal transduction	2	25	1.69	0.0034	9606.ENSP00000215832,9606.ENSP00000263826	MAPK1,AKT3
WP581	EPO receptor signaling	2	26	1.67	0.0037	9606.ENSP00000215832,9606.ENSP00000387784	MAPK1,SOS1
WP4657	22q11.2 copy number variation syndrome	3	119	1.19	0.0039	9606.ENSP00000275493,9606.ENSP00000381185,9606.ENSP00000410294	EGFR,BCL2,FGFR2
WP2583	T cell receptor and co-stimulatory signaling	2	28	1.64	0.0042	9606.ENSP00000324806,9606.ENSP00000361021	GSK3B,PTEN
WP3972	PDGFR-beta pathway	2	29	1.62	0.0044	9606.ENSP00000263967,9606.ENSP00000387784	PIK3CA,SOS1
WP2533	Glycerophospholipid biosynthetic pathway	2	30	1.61	0.0047	9606.ENSP00000263967,9606.ENSP00000289153	PIK3CA,PIK3CB
WP236	Adipogenesis	3	130	1.15	0.0049	9606.ENSP00000344456,9606.ENSP00000368880,9606.ENSP00000387699	CTNNB1,FOXO1,CREB1
WP2363	Gastric cancer network 2	2	31	1.6	0.0049	9606.ENSP00000275493,9606.ENSP00000344456	EGFR,CTNNB1
WP2817	Mammary gland development pathway - Pregnancy and lactation (Stage 3 of 4)	2	31	1.6	0.0049	9606.ENSP00000227507,9606.ENSP00000275493	CCND1,EGFR
WP3858	Toll-like receptor signaling related to MyD88	2	31	1.6	0.0049	9606.ENSP00000215832,9606.ENSP00000430684	MAPK1,IKBKB
WP2875	Constitutive androstane receptor pathway	2	32	1.58	0.0052	9606.ENSP00000335153,9606.ENSP00000368880	HSP90AA1,FOXO1
WP244	Alpha 6 beta 4 signaling pathway	2	33	1.57	0.0054	9606.ENSP00000215832,9606.ENSP00000387784	MAPK1,SOS1
WP2876	Pregnane X receptor pathway	2	33	1.57	0.0054	9606.ENSP00000335153,9606.ENSP00000368880	HSP90AA1,FOXO1
WP4838	Regucalcin in proximal tubule epithelial kidney cells	2	33	1.57	0.0054	9606.ENSP00000215832,9606.ENSP00000263967	MAPK1,PIK3CA
WP2858	Ectoderm differentiation	3	137	1.13	0.0055	9606.ENSP00000282111,9606.ENSP00000344456,9606.ENSP00000410294	TCF7L1,CTNNB1,FGFR2
WP2853	Endoderm differentiation	3	140	1.12	0.0058	9606.ENSP00000282111,9606.ENSP00000344456,9606.ENSP00000368880	TCF7L1,CTNNB1,FOXO1
WP5083	Neuroinflammation and glutamatergic signaling	3	140	1.12	0.0058	9606.ENSP00000215832,9606.ENSP00000381185,9606.ENSP00000387699	MAPK1,BCL2,CREB1
WP3298	Melatonin metabolism and effects	2	35	1.54	0.0059	9606.ENSP00000324806,9606.ENSP00000368880	GSK3B,FOXO1
WP3617	Photodynamic therapy-induced NF-kB survival signaling	2	35	1.54	0.0059	9606.ENSP00000227507,9606.ENSP00000430684	CCND1,IKBKB
WP4877	Host-pathogen interaction of human coronaviruses - MAPK signaling	2	35	1.54	0.0059	9606.ENSP00000215832,9606.ENSP00000381185	MAPK1,BCL2
WP524	G13 signaling pathway	2	38	1.51	0.0068	9606.ENSP00000263967,9606.ENSP00000289153	PIK3CA,PIK3CB
WP3937	Microglia pathogen phagocytosis pathway	2	39	1.5	0.0071	9606.ENSP00000263967,9606.ENSP00000289153	PIK3CA,PIK3CB
WP3941	Oxidative damage response	2	40	1.49	0.0074	9606.ENSP00000228872,9606.ENSP00000381185	CDKN1B,BCL2
WP706	Sudden infant death syndrome (SIDS) susceptibility pathways	3	155	1.07	0.0074	9606.ENSP00000263253,9606.ENSP00000344456,9606.ENSP00000387699	EP300,CTNNB1,CREB1
WP1433	Nucleotide-binding oligomerization domain (NOD) pathway	2	41	1.47	0.0077	9606.ENSP00000335153,9606.ENSP00000430684	HSP90AA1,IKBKB
WP2636	Common pathways underlying drug addiction	2	41	1.47	0.0077	9606.ENSP00000215832,9606.ENSP00000387699	MAPK1,CREB1
WP4136	Fibrin complement receptor 3 signaling pathway	2	41	1.47	0.0077	9606.ENSP00000263967,9606.ENSP00000430684	PIK3CA,IKBKB
WP4249	Hedgehog signaling pathway	2	43	1.45	0.0083	9606.ENSP00000227507,9606.ENSP00000381185	CCND1,BCL2
WP1591	Heart development	2	44	1.44	0.0086	9606.ENSP00000215832,9606.ENSP00000344456	MAPK1,CTNNB1
WP4823	Genes controlling nephrogenesis	2	44	1.44	0.0086	9606.ENSP00000344456,9606.ENSP00000410294	CTNNB1,FGFR2
WP4008	NO/cGMP/PKG mediated neuroprotection	2	46	1.42	0.0092	9606.ENSP00000381185,9606.ENSP00000387699	BCL2,CREB1
WP2203	Thymic stromal lymphopoietin (TSLP) signaling pathway	2	47	1.42	0.0096	9606.ENSP00000215832,9606.ENSP00000263967	MAPK1,PIK3CA
WP2637	Interleukin-1 (IL-1) structural pathway	2	47	1.42	0.0096	9606.ENSP00000215832,9606.ENSP00000430684	MAPK1,IKBKB
WP2848	Pluripotent stem cell differentiation pathway	2	48	1.41	0.0099	9606.ENSP00000265171,9606.ENSP00000346508	EGF,PDGFA
WP3646	Hepatitis C and hepatocellular carcinoma	2	49	1.4	0.0102	9606.ENSP00000227507,9606.ENSP00000387784	CCND1,SOS1
WP4747	Netrin-UNC5B signaling pathway	2	52	1.37	0.0114	9606.ENSP00000215832,9606.ENSP00000263967	MAPK1,PIK3CA
WP2864	Apoptosis-related network due to altered Notch3 in ovarian cancer	2	53	1.36	0.0117	9606.ENSP00000215832,9606.ENSP00000228872	MAPK1,CDKN1B
WP195	IL-1 signaling pathway	2	54	1.35	0.0121	9606.ENSP00000215832,9606.ENSP00000430684	MAPK1,IKBKB
WP2018	RANKL/RANK signaling pathway	2	55	1.35	0.0125	9606.ENSP00000215832,9606.ENSP00000430684	MAPK1,IKBKB
WP5072	Modulators of TCR signaling and T cell activation	2	60	1.31	0.0146	9606.ENSP00000228872,9606.ENSP00000430684	CDKN1B,IKBKB
WP3998	Prader-Willi and Angelman syndrome	2	61	1.3	0.0150	9606.ENSP00000227507,9606.ENSP00000258149	CCND1,MDM2
WP3624	Lung fibrosis	2	63	1.29	0.0159	9606.ENSP00000265171,9606.ENSP00000346508	EGF,PDGFA
WP1403	AMP-activated protein kinase (AMPK) signaling	2	68	1.25	0.0183	9606.ENSP00000263967,9606.ENSP00000289153	PIK3CA,PIK3CB
WP1982	Sterol regulatory element-binding proteins (SREBP) signaling	2	69	1.25	0.0187	9606.ENSP00000263967,9606.ENSP00000387699	PIK3CA,CREB1
WP2572	Primary focal segmental glomerulosclerosis (FSGS)	2	72	1.23	0.0202	9606.ENSP00000228872,9606.ENSP00000344456	CDKN1B,CTNNB1
WP4016	DNA IR-damage and cellular response via ATR	2	77	1.2	0.0228	9606.ENSP00000258149,9606.ENSP00000266970	MDM2,CDK2
WP4538	Regulatory circuits of the STAT3 signaling pathway	2	78	1.2	0.0232	9606.ENSP00000215832,9606.ENSP00000275493	MAPK1,EGFR
WP2840	Hair follicle development: cytodifferentiation - part 3 of 3	2	88	1.14	0.0290	9606.ENSP00000275493,9606.ENSP00000344456	EGFR,CTNNB1
WP1772	Apoptosis modulation and signaling	2	90	1.13	0.0301	9606.ENSP00000381185,9606.ENSP00000430684	BCL2,IKBKB
