# Supplementary material for: miRNA Expression Patterns in Early- and Late-Stage Prostate Cancer Patients: High-Throughput Analysis
Source: Biomedicines. 2023 Nov 16;11(11):3073. doi: 10.3390/biomedicines11113073 (PMC10669269; doi:10.3390/biomedicines11113073)
Supplement: Supplementary file 1 [file biomedicines-11-03073-s001.zip › File S4.csv]

Enrichment FDR	nGenes	Pathway Genes	Fold Enrichment	Pathway	URL	Genes
0.00894981263322751	5	63	9.83264320220842	Basal cell carcinoma	http://www.genome.jp/kegg-bin/show_pathway?hsa05217	WNT16 WNT2B WNT10A TCF7L1 WNT7A
0.0286205066399743	4	61	8.1240199572345	Steroid hormone biosynthesis	http://www.genome.jp/kegg-bin/show_pathway?hsa00140	HSD17B2 HSD11B1 AKR1C2 UGT1A6
0.0375434137720452	4	68	7.28772378516624	Chemical carcinogenesis	http://www.genome.jp/kegg-bin/show_pathway?hsa05204	SULT2A1 HSD11B1 AKR1C2 UGT1A6
0.0436400433821296	4	74	6.69682726204465	Metabolism of xenobiotics by cytochrome P450	http://www.genome.jp/kegg-bin/show_pathway?hsa00980	SULT2A1 ALDH3A1 HSD11B1 UGT1A6
0.00541914095564717	8	157	6.31293270562171	Hippo signaling pathway	http://www.genome.jp/kegg-bin/show_pathway?hsa04390	WNT16 BMP7 CCND2 WNT2B WNT10A TCF7L1 WNT7A SOX2
0.0286205066399743	5	101	6.13323288850624	Melanogenesis	http://www.genome.jp/kegg-bin/show_pathway?hsa04916	WNT16 WNT2B WNT10A TCF7L1 WNT7A
0.00541914095564717	8	166	5.97066526977475	Wnt signaling pathway	http://www.genome.jp/kegg-bin/show_pathway?hsa04310	WNT16 DKK4 CCND2 LGR6 WNT2B WNT10A TCF7L1 WNT7A
0.0286205066399743	6	143	5.19823654606263	Signaling pathways regulating pluripotency of stem cells	http://www.genome.jp/kegg-bin/show_pathway?hsa04550	WNT16 WNT2B WNT10A WNT7A ID4 SOX2
0.0286205066399743	6	147	5.05678793256433	Breast cancer	http://www.genome.jp/kegg-bin/show_pathway?hsa05224	WNT16 FGF20 WNT2B WNT10A TCF7L1 WNT7A
0.0286205066399743	6	148	5.02262044653349	Gastric cancer	http://www.genome.jp/kegg-bin/show_pathway?hsa05226	WNT16 FGF20 WNT2B WNT10A TCF7L1 WNT7A
0.0105113034764062	8	202	4.90658631080499	Proteoglycans in cancer	http://www.genome.jp/kegg-bin/show_pathway?hsa05205	WNT16 CAV2 CAV1 VAV3 WNT2B WNT10A WNT7A IGF2
0.0375434137720452	6	167	4.45118458734705	Hepatocellular carcinoma	http://www.genome.jp/kegg-bin/show_pathway?hsa05225	WNT16 WNT2B WNT10A TCF7L1 WNT7A IGF2
