# Supplementary material for: miRNA Expression Patterns in Early- and Late-Stage Prostate Cancer Patients: High-Throughput Analysis
Source: Biomedicines. 2023 Nov 16;11(11):3073. doi: 10.3390/biomedicines11113073 (PMC10669269; doi:10.3390/biomedicines11113073)
Supplement: Supplementary file 1 [file biomedicines-11-03073-s001.zip › File S5.csv]

Enrichment FDR	nGenes	Pathway Genes	Fold Enrichment	Pathway	URL	Genes
0.00541914095564717	8	166	5.97066526977475	Wnt signaling pathway	http://www.genome.jp/kegg-bin/show_pathway?hsa04310	WNT16 DKK4 CCND2 LGR6 WNT2B WNT10A TCF7L1 WNT7A
0.00541914095564717	8	157	6.31293270562171	Hippo signaling pathway	http://www.genome.jp/kegg-bin/show_pathway?hsa04390	WNT16 BMP7 CCND2 WNT2B WNT10A TCF7L1 WNT7A SOX2
0.00894981263322751	5	63	9.83264320220842	Basal cell carcinoma	http://www.genome.jp/kegg-bin/show_pathway?hsa05217	WNT16 WNT2B WNT10A TCF7L1 WNT7A
0.0105113034764062	8	202	4.90658631080499	Proteoglycans in cancer	http://www.genome.jp/kegg-bin/show_pathway?hsa05205	WNT16 CAV2 CAV1 VAV3 WNT2B WNT10A WNT7A IGF2
0.0286205066399743	4	61	8.1240199572345	Steroid hormone biosynthesis	http://www.genome.jp/kegg-bin/show_pathway?hsa00140	HSD17B2 HSD11B1 AKR1C2 UGT1A6
0.0286205066399743	6	143	5.19823654606263	Signaling pathways regulating pluripotency of stem cells	http://www.genome.jp/kegg-bin/show_pathway?hsa04550	WNT16 WNT2B WNT10A WNT7A ID4 SOX2
0.0286205066399743	5	101	6.13323288850624	Melanogenesis	http://www.genome.jp/kegg-bin/show_pathway?hsa04916	WNT16 WNT2B WNT10A TCF7L1 WNT7A
0.0286205066399743	6	147	5.05678793256433	Breast cancer	http://www.genome.jp/kegg-bin/show_pathway?hsa05224	WNT16 FGF20 WNT2B WNT10A TCF7L1 WNT7A
0.0286205066399743	6	148	5.02262044653349	Gastric cancer	http://www.genome.jp/kegg-bin/show_pathway?hsa05226	WNT16 FGF20 WNT2B WNT10A TCF7L1 WNT7A
0.0375434137720452	4	68	7.28772378516624	Chemical carcinogenesis	http://www.genome.jp/kegg-bin/show_pathway?hsa05204	SULT2A1 HSD11B1 AKR1C2 UGT1A6
0.0375434137720452	6	167	4.45118458734705	Hepatocellular carcinoma	http://www.genome.jp/kegg-bin/show_pathway?hsa05225	WNT16 WNT2B WNT10A TCF7L1 WNT7A IGF2
0.0436400433821296	4	74	6.69682726204465	Metabolism of xenobiotics by cytochrome P450	http://www.genome.jp/kegg-bin/show_pathway?hsa00980	SULT2A1 ALDH3A1 HSD11B1 UGT1A6
0.0723059214368641	6	200	3.71673913043478	Focal adhesion	http://www.genome.jp/kegg-bin/show_pathway?hsa04510	MYL9 CAV2 CAV1 CCND2 VAV3 LAMB3
0.0723059214368641	4	89	5.56814851001466	Bile secretion	http://www.genome.jp/kegg-bin/show_pathway?hsa04976	SULT2A1 ABCG2 ATP1B1 UGT1A6
0.0921074260121225	5	154	4.02244494635799	MTOR signaling pathway	http://www.genome.jp/kegg-bin/show_pathway?hsa04150	WNT16 WNT2B WNT10A WNT7A DDIT4
0.0921074260121225	5	155	3.99649368863955	Cushing syndrome	http://www.genome.jp/kegg-bin/show_pathway?hsa04934	WNT16 WNT2B WNT10A TCF7L1 WNT7A
0.160978627029799	5	181	3.42241172231564	Axon guidance	http://www.genome.jp/kegg-bin/show_pathway?hsa04360	BMP7 MYL9 EPHA2 EPHB1 CFL2
0.167884318260672	2	26	9.53010033444816	Folate biosynthesis	http://www.genome.jp/kegg-bin/show_pathway?hsa00790	TH AKR1B10
0.167884318260672	7	331	2.62005779587548	Human papillomavirus infection	http://www.genome.jp/kegg-bin/show_pathway?hsa05165	WNT16 CCND2 WNT2B WNT10A TCF7L1 WNT7A LAMB3
0.196567663026059	3	75	4.95565217391304	PPAR signaling pathway	http://www.genome.jp/kegg-bin/show_pathway?hsa03320	ME1 FADS2 ACSL6
