# Supplementary material for: miRNA Expression Patterns in Early- and Late-Stage Prostate Cancer Patients: High-Throughput Analysis
Source: Biomedicines. 2023 Nov 16;11(11):3073. doi: 10.3390/biomedicines11113073 (PMC10669269; doi:10.3390/biomedicines11113073)
Supplement: Supplementary file 1 [file biomedicines-11-03073-s001.zip › File S6_results_LPCa.xlsx]

## Sheet: miR324_3p
Gene name	Gene id	Description	Biotype	LogFC	LogCPM	QLF_FDR	MW_FDR	Spearman_correlation_coef	Spearman_correlation_FDR
MFSD2A	ENSG00000168389	major facilitator superfamily domain containing 2A	protein_coding	-6.66	5.74	1.22661e-05	0.000161482	-0.64	0.000163181
STAC2	ENSG00000141750	SH3 and cysteine rich domain 2	protein_coding	-5.35	5.69	3.5457e-05	0.000275416	-0.64	0.000188327
PTGS1	ENSG00000095303	prostaglandin-endoperoxide synthase 1	protein_coding	-2.44	5.69	0.000264073	0.0107531	-0.66	8.72349e-05
KCNK10	ENSG00000100433	potassium two pore domain channel subfamily K member 10	protein_coding	-2.24	-1.28	0.00434441	0.0323962	-0.36	0.0986852
ID4	ENSG00000172201	inhibitor of DNA binding 4, HLH protein	protein_coding	-1.98	5.6	8.04489e-06	0.000114847	-0.76	8.33232e-07
MYL9	ENSG00000101335	myosin light chain 9	protein_coding	-1.81	10.82	1.5547e-05	0.000275416	-0.77	6.59659e-07
CHGB	ENSG00000089199	chromogranin B	protein_coding	-1.79	3.52	0.00349352	0.00466188	-0.66	8.72349e-05
TRIM71	ENSG00000206557	tripartite motif containing 71	protein_coding	-1.75	-3.31	0.0210241	0.0272489	-0.35	0.113581
NHLRC4	ENSG00000257108	NHL repeat containing 4	protein_coding	-1.6	1.44	0.000619096	0.00398843	-0.55	0.00283429
PNMA2	ENSG00000240694	PNMA family member 2	protein_coding	-1.56	1.2	0.0046102	0.00720585	-0.53	0.00389508
FBXL2	ENSG00000153558	F-box and leucine rich repeat protein 2	protein_coding	-1.52	2.59	2.28803e-06	0.000161482	-0.79	1.56698e-07
WNT2B	ENSG00000134245	Wnt family member 2B	protein_coding	-1.52	4.16	0.00367112	0.0107531	-0.52	0.00584249
VAV3	ENSG00000134215	vav guanine nucleotide exchange factor 3	protein_coding	-1.49	3.45	8.00669e-05	0.000439058	-0.65	0.000139193
FAM107A	ENSG00000168309	family with sequence similarity 107 member A	protein_coding	-1.46	6.48	7.29256e-06	0.000161482	-0.74	2.49306e-06
CCND2	ENSG00000118971	cyclin D2	protein_coding	-1.31	6.64	0.00131613	0.00123271	-0.64	0.000188327
CCN6	ENSG00000112761	cellular communication network factor 6	protein_coding	-1.31	-0.97	0.0146199	0.0421612	-0.52	0.00584249
HSPA4L	ENSG00000164070	heat shock protein family A (Hsp70) member 4 like	protein_coding	-1.3	3.87	4.493e-06	0.000684911	-0.78	4.08922e-07
KIF5A	ENSG00000155980	kinesin family member 5A	protein_coding	-1.25	0.02	0.000624938	0.000346309	-0.63	0.000251428
BDKRB2	ENSG00000168398	bradykinin receptor B2	protein_coding	-1.23	3.04	0.0116777	0.0222625	-0.42	0.0389042
CNTN1	ENSG00000018236	contactin 1	protein_coding	-1.18	5.9	0.0348541	0.0176367	-0.43	0.0335038
PLCD3	ENSG00000161714	phospholipase C delta 3	protein_coding	-1.17	4.82	3.42901e-05	0.000275416	-0.69	2.63586e-05
MAP3K20	ENSG00000091436	mitogen-activated protein kinase kinase kinase 20	protein_coding	-1.14	7.19	0.000777023	0.00123271	-0.63	0.000217888
COL6A1	ENSG00000142156	collagen type VI alpha 1 chain	protein_coding	-1.14	8.09	0.000824014	0.00466188	-0.58	0.000970096
SV2A	ENSG00000159164	synaptic vesicle glycoprotein 2A	protein_coding	-1.14	2.99	0.000215329	0.000551112	-0.62	0.000385369
TENM3	ENSG00000218336	teneurin transmembrane protein 3	protein_coding	-1.13	4.09	0.00852088	0.0176367	-0.51	0.00708093
NTN1	ENSG00000065320	netrin 1	protein_coding	-1.1	4.06	0.0221526	0.0222625	-0.46	0.0192099
STK26	ENSG00000134602	serine/threonine kinase 26	protein_coding	-1.06	5.25	2.23752e-05	0.000829385	-0.71	1.24515e-05
HECTD2	ENSG00000165338	HECT domain E3 ubiquitin protein ligase 2	protein_coding	-1.01	4.72	0.000380156	0.00101768	-0.6	0.000578472
SH3PXD2B	ENSG00000174705	SH3 and PX domains 2B	protein_coding	-1	5.57	0.000226993	0.00210559	-0.6	0.000658982
FADS1	ENSG00000149485	fatty acid desaturase 1	protein_coding	-0.99	5.62	0.000783437	0.000275416	-0.59	0.000853427
MMP14	ENSG00000157227	matrix metallopeptidase 14	protein_coding	-0.99	6.81	3.5457e-05	0.000684911	-0.73	4.62163e-06
SH3PXD2A	ENSG00000107957	SH3 and PX domains 2A	protein_coding	-0.99	6.15	4.48658e-05	0.00123271	-0.65	0.000139193
CERCAM	ENSG00000167123	cerebral endothelial cell adhesion molecule	protein_coding	-0.97	5.4	4.1309e-05	0.000202437	-0.69	2.19814e-05
ZFAND5	ENSG00000107372	zinc finger AN1-type containing 5	protein_coding	-0.92	7.64	1.50575e-06	0.000114847	-0.8	1.17963e-07
CDIP1	ENSG00000089486	cell death inducing p53 target 1	protein_coding	-0.86	5.31	0.000119013	0.00123271	-0.65	0.000119183
PLCE1	ENSG00000138193	phospholipase C epsilon 1	protein_coding	-0.84	3.81	0.00142087	0.00123271	-0.57	0.00158563
GPCPD1	ENSG00000125772	glycerophosphocholine phosphodiesterase 1	protein_coding	-0.84	5.37	8.40504e-05	0.000275416	-0.71	1.24515e-05
NACC2	ENSG00000148411	NACC family member 2	protein_coding	-0.82	6.23	0.00221993	0.0122064	-0.52	0.00584249
AATK	ENSG00000181409	apoptosis associated tyrosine kinase	protein_coding	-0.81	2.09	0.00210543	0.000829385	-0.59	0.000751544
BTG3	ENSG00000154640	BTG anti-proliferation factor 3	protein_coding	-0.79	4.63	0.00073072	0.00101768	-0.58	0.000970096
PKD2	ENSG00000118762	polycystin 2, transient receptor potential cation channel	protein_coding	-0.79	5.44	0.000386701	0.000202437	-0.63	0.000251428
PTPN14	ENSG00000152104	protein tyrosine phosphatase non-receptor type 14	protein_coding	-0.71	6.21	0.00467448	0.00466188	-0.5	0.00859453
ST3GAL2	ENSG00000157350	ST3 beta-galactoside alpha-2,3-sialyltransferase 2	protein_coding	-0.71	4.44	0.000169506	0.000551112	-0.68	3.76404e-05
CALM1	ENSG00000198668	calmodulin 1	protein_coding	-0.7	8.78	8.17359e-05	0.000202437	-0.68	3.76404e-05
CBX6	ENSG00000183741	chromobox 6	protein_coding	-0.68	6.96	0.00395733	0.00720585	-0.54	0.00352187
ARRDC2	ENSG00000105643	arrestin domain containing 2	protein_coding	-0.67	4.96	0.00781372	0.00398843	-0.5	0.00781458
PPP1R12C	ENSG00000125503	protein phosphatase 1 regulatory subunit 12C	protein_coding	-0.66	6.52	0.000403755	0.00210559	-0.61	0.000506304
TGFB1	ENSG00000105329	transforming growth factor beta 1	protein_coding	-0.63	5.07	0.00443035	0.00398843	-0.51	0.00642892
ENAH	ENSG00000154380	ENAH actin regulator	protein_coding	-0.63	7.47	0.000612031	0.00149145	-0.58	0.00110189
JAG2	ENSG00000184916	jagged canonical Notch ligand 2	protein_coding	-0.63	5.1	0.00713673	0.0138685	-0.49	0.00942878
TAGLN2	ENSG00000158710	transgelin 2	protein_coding	-0.62	7.61	0.0226003	0.0421612	-0.46	0.0192099
RBFOX2	ENSG00000100320	RNA binding fox-1 homolog 2	protein_coding	-0.61	6.9	0.000594347	0.00178359	-0.58	0.000970096
EIF4EBP2	ENSG00000148730	eukaryotic translation initiation factor 4E binding protein 2	protein_coding	-0.59	7.36	0.000461204	0.000161482	-0.63	0.000251428
MAP3K14	ENSG00000006062	mitogen-activated protein kinase kinase kinase 14	protein_coding	-0.59	4.38	0.00959128	0.0107531	-0.54	0.00316034
REV3L	ENSG00000009413	REV3 like, DNA directed polymerase zeta catalytic subunit	protein_coding	-0.58	5.12	0.0401452	0.00210559	-0.42	0.0389042
MPRIP	ENSG00000133030	myosin phosphatase Rho interacting protein	protein_coding	-0.57	7.2	0.000620135	0.00342614	-0.68	3.16136e-05
NR3C2	ENSG00000151623	nuclear receptor subfamily 3 group C member 2	protein_coding	-0.57	4.06	0.0038401	0.000684911	-0.51	0.00708093
STAT5B	ENSG00000173757	signal transducer and activator of transcription 5B	protein_coding	-0.55	6.7	0.000260905	0.00101768	-0.7	1.50087e-05
FOXO1	ENSG00000150907	forkhead box O1	protein_coding	-0.55	5.16	0.00369484	0.00466188	-0.56	0.00201302
ELK3	ENSG00000111145	ETS transcription factor ELK3	protein_coding	-0.53	5.22	0.0220343	0.0138685	-0.42	0.0361563
LPGAT1	ENSG00000123684	lysophosphatidylglycerol acyltransferase 1	protein_coding	-0.53	5.94	0.00959975	0.046735	-0.5	0.00781458
NOL4L	ENSG00000197183	nucleolar protein 4 like	protein_coding	-0.52	4.7	0.00280167	0.00342614	-0.56	0.00178661
PITPNM2	ENSG00000090975	phosphatidylinositol transfer protein membrane associated 2	protein_coding	-0.51	3.72	0.0363662	0.0343796	-0.42	0.0389042
KIAA0930	ENSG00000100364	KIAA0930	protein_coding	-0.49	6.52	0.0258756	0.0343796	-0.43	0.0335038
HMG20A	ENSG00000140382	high mobility group 20A	protein_coding	-0.49	4.33	0.015801	0.00101768	-0.5	0.00781458
SLC25A24	ENSG00000085491	solute carrier family 25 member 24	protein_coding	-0.44	4.76	0.0425652	0.0122064	-0.35	0.117112
SEMA4C	ENSG00000168758	semaphorin 4C	protein_coding	-0.44	5.87	0.0179319	0.0381054	-0.49	0.0113268
CLUAP1	ENSG00000103351	clusterin associated protein 1	protein_coding	-0.43	4.89	0.00163886	0.000202437	-0.62	0.000290506
WDR44	ENSG00000131725	WD repeat domain 44	protein_coding	-0.42	4.44	0.0402249	0.00943724	-0.38	0.07264
ACTN4	ENSG00000130402	actinin alpha 4	protein_coding	-0.41	8.84	0.00674286	0.0107531	-0.54	0.00352187
THAP11	ENSG00000168286	THAP domain containing 11	protein_coding	-0.39	4.66	0.00813802	0.00178359	-0.56	0.00178661
PKM	ENSG00000067225	pyruvate kinase M1/2	protein_coding	-0.36	9.37	0.0058309	0.00249166	-0.53	0.00389508
HMGB1	ENSG00000189403	high mobility group box 1	protein_coding	-0.35	7.54	0.00423623	0.00292962	-0.6	0.000658982
DCAF15	ENSG00000132017	DDB1 and CUL4 associated factor 15	protein_coding	-0.34	4.19	0.0182601	0.000551112	-0.48	0.0135942
NEK9	ENSG00000119638	NIMA related kinase 9	protein_coding	-0.3	6.9	0.0419368	0.0107531	-0.37	0.0817378
POLR2C	ENSG00000102978	RNA polymerase II subunit C	protein_coding	-0.3	6.13	0.0498499	0.0122064	-0.43	0.0310185
U2AF2	ENSG00000063244	U2 small nuclear RNA auxiliary factor 2	protein_coding	0.22	7.18	0.0323897	0.000114847	0.55	0.00283429
NUP62	ENSG00000213024	nucleoporin 62	protein_coding	0.23	5.95	0.0449736	0.0138685	0.49	0.00942878
SUPT5H	ENSG00000196235	SPT5 homolog, DSIF elongation factor subunit	protein_coding	0.27	7.46	0.0309	0.00720585	0.52	0.00477303
SFPQ	ENSG00000116560	splicing factor proline and glutamine rich	protein_coding	0.27	7.85	0.0406731	0.00466188	0.45	0.0226107
DDX41	ENSG00000183258	DEAD-box helicase 41	protein_coding	0.29	6.04	0.0346547	0.00292962	0.43	0.0335038
NHP2	ENSG00000145912	NHP2 ribonucleoprotein	protein_coding	0.3	5.38	0.0460641	0.0310182	0.45	0.0208349
RNF149	ENSG00000163162	ring finger protein 149	protein_coding	0.31	5.39	0.0389777	0.00623949	0.41	0.0481509
BMS1	ENSG00000165733	BMS1 ribosome biogenesis factor	protein_coding	0.31	5.8	0.0286546	0.000829385	0.47	0.0161847
FLAD1	ENSG00000160688	flavin adenine dinucleotide synthetase 1	protein_coding	0.31	4.79	0.019239	0.00342614	0.54	0.00316034
ATXN2L	ENSG00000168488	ataxin 2 like	protein_coding	0.32	6.54	0.00770093	0.000439058	0.63	0.000251428
GGA1	ENSG00000100083	golgi associated, gamma adaptin ear containing, ARF binding protein 1	protein_coding	0.32	6.09	0.0398722	0.0198496	0.44	0.0264368
OMA1	ENSG00000162600	OMA1 zinc metallopeptidase	protein_coding	0.32	4.75	0.0225703	0.0248585	0.49	0.0103209
PIAS4	ENSG00000105229	protein inhibitor of activated STAT 4	protein_coding	0.32	4.81	0.0102113	0.000551112	0.56	0.00201302
KDM5C	ENSG00000126012	lysine demethylase 5C	protein_coding	0.33	6.77	0.00759379	0.00178359	0.62	0.000290506
INPPL1	ENSG00000165458	inositol polyphosphate phosphatase like 1	protein_coding	0.33	6.96	0.00946693	0.00123271	0.6	0.000658982
WDR6	ENSG00000178252	WD repeat domain 6	protein_coding	0.33	7.79	0.0197225	0.000551112	0.48	0.0135942
SCYL1	ENSG00000142186	SCY1 like pseudokinase 1	protein_coding	0.34	7.05	0.00614903	0.00292962	0.57	0.00158563
ISG20L2	ENSG00000143319	interferon stimulated exonuclease gene 20 like 2	protein_coding	0.34	5.45	0.00434409	0.00101768	0.57	0.00158563
GSK3B	ENSG00000082701	glycogen synthase kinase 3 beta	protein_coding	0.34	6.15	0.0388465	0.00249166	0.42	0.0416591
RETREG2	ENSG00000144567	reticulophagy regulator family member 2	protein_coding	0.34	7.29	0.00364925	0.00342614	0.55	0.00225163
G3BP1	ENSG00000145907	G3BP stress granule assembly factor 1	protein_coding	0.35	7.28	0.00372304	0.00101768	0.62	0.000290506
RAN	ENSG00000132341	RAN, member RAS oncogene family	protein_coding	0.35	7.36	0.0323161	0.0278207	0.47	0.0148392
CCT6A	ENSG00000146731	chaperonin containing TCP1 subunit 6A	protein_coding	0.36	7.06	0.00515756	0.00828562	0.58	0.00125093
MKNK2	ENSG00000099875	MAPK interacting serine/threonine kinase 2	protein_coding	0.36	7.9	0.0253909	0.0138685	0.51	0.00642892
HSPA9	ENSG00000113013	heat shock protein family A (Hsp70) member 9	protein_coding	0.36	8.09	0.00522548	0.000829385	0.61	0.000440939
PTBP1	ENSG00000011304	polypyrimidine tract binding protein 1	protein_coding	0.36	7.8	0.00257458	0.000551112	0.63	0.000217888
EI24	ENSG00000149547	EI24 autophagy associated transmembrane protein	protein_coding	0.36	7.13	0.00417745	0.000439058	0.56	0.00178661
GATAD2A	ENSG00000167491	GATA zinc finger domain containing 2A	protein_coding	0.37	5.96	0.0253795	0.0381054	0.57	0.00158563
GOLGA2	ENSG00000167110	golgin A2	protein_coding	0.37	7.06	0.0145801	0.00828562	0.55	0.00283429
NACC1	ENSG00000160877	nucleus accumbens associated 1	protein_coding	0.38	6.2	0.0344238	0.0157167	0.41	0.0481509
EIF4B	ENSG00000063046	eukaryotic translation initiation factor 4B	protein_coding	0.38	8.86	0.00275749	0.00178359	0.6	0.000658982
C1orf43	ENSG00000143612	chromosome 1 open reading frame 43	protein_coding	0.38	7.72	0.019376	0.00828562	0.63	0.000251428
EIPR1	ENSG00000032389	EARP complex and GARP complex interacting protein 1	protein_coding	0.4	4.59	0.0030818	0.000551112	0.62	0.000385369
FEN1	ENSG00000168496	flap structure-specific endonuclease 1	protein_coding	0.41	3.96	0.00601231	0.00249166	0.6	0.000658982
SLC1A5	ENSG00000105281	solute carrier family 1 member 5	protein_coding	0.41	8.16	0.0186115	0.00943724	0.43	0.0335038
CXXC5	ENSG00000171604	CXXC finger protein 5	protein_coding	0.41	5.65	0.00960989	0.00537948	0.52	0.00527351
IRGQ	ENSG00000167378	immunity related GTPase Q	protein_coding	0.41	5.3	0.0142296	0.00178359	0.46	0.0192099
TUBG1	ENSG00000131462	tubulin gamma 1	protein_coding	0.41	5.2	0.0192769	0.0198496	0.49	0.00942878
NIFK	ENSG00000155438	nucleolar protein interacting with the FHA domain of MKI67	protein_coding	0.41	4.99	0.0145814	0.0176367	0.5	0.00859453
GATD1	ENSG00000177225	glutamine amidotransferase like class 1 domain containing 1	protein_coding	0.42	6.31	0.000647442	0.000684911	0.66	8.72349e-05
RPL4	ENSG00000174444	ribosomal protein L4	protein_coding	0.43	10.74	0.0212306	0.0107531	0.44	0.0286638
GSE1	ENSG00000131149	Gse1 coiled-coil protein	protein_coding	0.43	6.71	0.024193	0.0343796	0.42	0.0361563
NSMAF	ENSG00000035681	neutral sphingomyelinase activation associated factor	protein_coding	0.43	5.36	0.00767304	0.00101768	0.56	0.00178661
LONP2	ENSG00000102910	lon peptidase 2, peroxisomal	protein_coding	0.43	7.26	0.00570666	0.00178359	0.55	0.00283429
PRKCSH	ENSG00000130175	protein kinase C substrate 80K-H	protein_coding	0.44	8.67	0.0182301	0.00720585	0.45	0.0226107
ACTG1	ENSG00000184009	actin gamma 1	protein_coding	0.44	11.3	0.01261	0.00720585	0.42	0.0361563
KLHL8	ENSG00000145332	kelch like family member 8	protein_coding	0.44	5.01	0.00630589	0.00720585	0.57	0.00158563
BCL2L1	ENSG00000171552	BCL2 like 1	protein_coding	0.45	6.85	0.00165107	0.00292962	0.6	0.000578472
ARID1A	ENSG00000117713	AT-rich interaction domain 1A	protein_coding	0.45	7.24	0.0312489	0.00828562	0.42	0.0361563
MRPL37	ENSG00000116221	mitochondrial ribosomal protein L37	protein_coding	0.45	5.95	0.000452292	0.000114847	0.69	2.63586e-05
TOMM40	ENSG00000130204	translocase of outer mitochondrial membrane 40	protein_coding	0.46	5.53	0.0198255	0.00398843	0.45	0.0208349
HDHD5	ENSG00000069998	haloacid dehalogenase like hydrolase domain containing 5	protein_coding	0.47	5.3	0.000741334	0.000551112	0.67	5.31846e-05
IFRD2	ENSG00000214706	interferon related developmental regulator 2	protein_coding	0.47	5.96	0.00831497	0.0278207	0.57	0.00158563
PPP6R2	ENSG00000100239	protein phosphatase 6 regulatory subunit 2	protein_coding	0.47	6.56	0.000244318	0.000275416	0.67	6.29447e-05
CCDC85C	ENSG00000205476	coiled-coil domain containing 85C	protein_coding	0.47	5.88	0.0128436	0.000829385	0.48	0.0124192
ZNF24	ENSG00000172466	zinc finger protein 24	protein_coding	0.47	7	0.000989783	0.000829385	0.62	0.000290506
CYTH2	ENSG00000105443	cytohesin 2	protein_coding	0.48	6.23	0.000128116	0.000275416	0.7	1.82219e-05
WDR4	ENSG00000160193	WD repeat domain 4	protein_coding	0.48	2.76	0.00866789	0.00537948	0.55	0.00253493
TJP1	ENSG00000104067	tight junction protein 1	protein_coding	0.49	7.3	0.00803517	0.00537948	0.5	0.00859453
MLEC	ENSG00000110917	malectin	protein_coding	0.49	8.68	0.00711807	0.00342614	0.54	0.00316034
NOP56	ENSG00000101361	NOP56 ribonucleoprotein	protein_coding	0.49	6.36	7.61642e-05	0.000346309	0.72	6.9242e-06
SPRYD4	ENSG00000176422	SPRY domain containing 4	protein_coding	0.49	4.88	0.00112561	0.00466188	0.65	0.000119183
MYSM1	ENSG00000162601	Myb like, SWIRM and MPN domains 1	protein_coding	0.49	4.99	0.0433535	0.00623949	0.36	0.0986852
DDOST	ENSG00000244038	dolichyl-diphosphooligosaccharide--protein glycosyltransferase non-catalytic subunit	protein_coding	0.5	8.15	0.00393655	0.0176367	0.63	0.000251428
AGFG2	ENSG00000106351	ArfGAP with FG repeats 2	protein_coding	0.5	5.77	0.0161562	0.046735	0.41	0.0481509
RPLP0	ENSG00000089157	ribosomal protein lateral stalk subunit P0	protein_coding	0.5	10.5	0.0197459	0.0176367	0.49	0.0103209
HLTF	ENSG00000071794	helicase like transcription factor	protein_coding	0.5	5.88	0.0133899	0.000275416	0.44	0.0264368
NDC1	ENSG00000058804	NDC1 transmembrane nucleoporin	protein_coding	0.5	4.52	0.00446916	0.00123271	0.56	0.00178661
APMAP	ENSG00000101474	adipocyte plasma membrane associated protein	protein_coding	0.5	7.27	0.00275156	0.00828562	0.58	0.000970096
DPY19L3	ENSG00000178904	dpy-19 like C-mannosyltransferase 3	protein_coding	0.5	6	0.00476389	0.000829385	0.52	0.00527351
ASNS	ENSG00000070669	asparagine synthetase (glutamine-hydrolyzing)	protein_coding	0.51	4.63	0.0074556	0.046735	0.46	0.0192099
G3BP2	ENSG00000138757	G3BP stress granule assembly factor 2	protein_coding	0.52	8.16	0.0117814	0.00101768	0.51	0.00642892
EMC10	ENSG00000161671	ER membrane protein complex subunit 10	protein_coding	0.52	7.72	0.00201456	0.00342614	0.56	0.00201302
LARP1	ENSG00000155506	La ribonucleoprotein 1, translational regulator	protein_coding	0.52	7.7	0.00123509	0.000551112	0.61	0.000440939
ZDHHC12	ENSG00000160446	zinc finger DHHC-type palmitoyltransferase 12	protein_coding	0.52	5.45	0.0338043	0.0176367	0.36	0.104509
NOLC1	ENSG00000166197	nucleolar and coiled-body phosphoprotein 1	protein_coding	0.53	6.95	0.000580516	0.000439058	0.65	0.000139193
CPT2	ENSG00000157184	carnitine palmitoyltransferase 2	protein_coding	0.53	5.24	0.00214347	0.00623949	0.54	0.00352187
NR2F6	ENSG00000160113	nuclear receptor subfamily 2 group F member 6	protein_coding	0.53	5.6	0.0176593	0.00720585	0.43	0.0310185
CNOT6	ENSG00000113300	CCR4-NOT transcription complex subunit 6	protein_coding	0.55	5.79	0.00061	0.000275416	0.63	0.000251428
PIK3CB	ENSG00000051382	phosphatidylinositol-4,5-bisphosphate 3-kinase catalytic subunit beta	protein_coding	0.55	6.09	0.00167891	0.00123271	0.57	0.00158563
DDI2	ENSG00000197312	DNA damage inducible 1 homolog 2	protein_coding	0.55	6.5	0.00402871	0.00149145	0.54	0.00316034
RANGAP1	ENSG00000100401	Ran GTPase activating protein 1	protein_coding	0.56	6.55	0.000137536	0.000439058	0.67	6.29447e-05
LRRC8D	ENSG00000171492	leucine rich repeat containing 8 VRAC subunit D	protein_coding	0.56	4.37	0.000160461	0.000114847	0.69	2.19814e-05
POLR1B	ENSG00000125630	RNA polymerase I subunit B	protein_coding	0.57	4.58	0.000662004	0.00101768	0.56	0.00201302
RACK1	ENSG00000204628	receptor for activated C kinase 1	protein_coding	0.58	10.48	0.00340498	0.00292962	0.53	0.00389508
PNKP	ENSG00000039650	polynucleotide kinase 3'-phosphatase	protein_coding	0.58	5.3	0.00448001	0.00210559	0.45	0.0208349
MYDGF	ENSG00000074842	myeloid derived growth factor	protein_coding	0.58	7.02	0.00438441	0.0157167	0.55	0.00253493
WDR3	ENSG00000065183	WD repeat domain 3	protein_coding	0.59	5.17	0.000600134	0.000439058	0.59	0.000853427
LPCAT1	ENSG00000153395	lysophosphatidylcholine acyltransferase 1	protein_coding	0.59	5.68	0.000160461	0.000684911	0.68	3.76404e-05
ZNF678	ENSG00000181450	zinc finger protein 678	protein_coding	0.59	3.84	0.000684212	0.000161482	0.6	0.000578472
KDELR2	ENSG00000136240	KDEL endoplasmic reticulum protein retention receptor 2	protein_coding	0.61	8.67	2.93298e-05	0.000202437	0.72	5.66486e-06
SYNJ2	ENSG00000078269	synaptojanin 2	protein_coding	0.61	5.69	0.00218174	0.00466188	0.55	0.00225163
ELL2	ENSG00000118985	elongation factor for RNA polymerase II 2	protein_coding	0.61	7.53	0.0135275	0.0421612	0.5	0.00781458
HSPA8	ENSG00000109971	heat shock protein family A (Hsp70) member 8	protein_coding	0.62	10.02	0.00922685	0.00101768	0.53	0.00431149
DNAJC5	ENSG00000101152	DnaJ heat shock protein family (Hsp40) member C5	protein_coding	0.62	7.15	0.000236257	0.000346309	0.67	6.29447e-05
TMED9	ENSG00000184840	transmembrane p24 trafficking protein 9	protein_coding	0.63	8.01	0.000272643	0.00292962	0.65	0.000119183
ANKRD52	ENSG00000139645	ankyrin repeat domain 52	protein_coding	0.63	6.14	0.0029141	0.000439058	0.54	0.00316034
EIF4G1	ENSG00000114867	eukaryotic translation initiation factor 4 gamma 1	protein_coding	0.63	8.94	0.00032098	0.000114847	0.67	6.29447e-05
SMARCC1	ENSG00000173473	SWI/SNF related, matrix associated, actin dependent regulator of chromatin subfamily c member 1	protein_coding	0.63	7.48	0.000306534	0.000114847	0.64	0.000188327
PRRC2A	ENSG00000204469	proline rich coiled-coil 2A	protein_coding	0.63	8.86	5.17989e-05	0.000161482	0.76	8.33232e-07
TONSL	ENSG00000160949	tonsoku like, DNA repair protein	protein_coding	0.64	3.26	0.00135911	0.00249166	0.62	0.000385369
FNBP1L	ENSG00000137942	formin binding protein 1 like	protein_coding	0.65	6.56	0.000726993	0.00101768	0.58	0.00125093
MEX3D	ENSG00000181588	mex-3 RNA binding family member D	protein_coding	0.66	4.45	0.000121845	0.000551112	0.69	2.19814e-05
TRIM11	ENSG00000154370	tripartite motif containing 11	protein_coding	0.66	4.96	9.50396e-05	0.000114847	0.69	2.19814e-05
DIAPH1	ENSG00000131504	diaphanous related formin 1	protein_coding	0.67	6.73	0.000487406	0.00466188	0.65	0.000139193
KIAA0895	ENSG00000164542	KIAA0895	protein_coding	0.67	3.58	0.00307193	0.00828562	0.49	0.00942878
ZNF121	ENSG00000197961	zinc finger protein 121	protein_coding	0.67	4.96	0.000569983	0.00398843	0.6	0.000658982
DIPK1B	ENSG00000165716	divergent protein kinase domain 1B	protein_coding	0.68	3.52	0.0103837	0.00828562	0.44	0.0286638
EIF3B	ENSG00000106263	eukaryotic translation initiation factor 3 subunit B	protein_coding	0.69	7.64	4.62762e-06	0.000275416	0.78	4.08922e-07
SEC23B	ENSG00000101310	SEC23 homolog B, COPII coat complex component	protein_coding	0.69	7.23	0.0162696	0.00342614	0.48	0.0124192
AAK1	ENSG00000115977	AP2 associated kinase 1	protein_coding	0.7	6.63	0.00219463	0.00537948	0.54	0.00352187
TMEM30B	ENSG00000182107	transmembrane protein 30B	protein_coding	0.7	6.98	0.000111312	0.000202437	0.71	1.24515e-05
VARS1	ENSG00000204394	valyl-tRNA synthetase 1	protein_coding	0.72	6.18	5.51496e-07	0.000114847	0.85	4.2827e-09
INTS5	ENSG00000185085	integrator complex subunit 5	protein_coding	0.72	5.67	5.9078e-07	0.000114847	0.81	3.89567e-08
APLP2	ENSG00000084234	amyloid beta precursor like protein 2	protein_coding	0.76	10.35	3.57888e-05	0.000114847	0.73	3.7856e-06
PHF12	ENSG00000109118	PHD finger protein 12	protein_coding	0.76	6.71	1.45955e-05	0.000275416	0.75	1.31492e-06
NOCT	ENSG00000151014	nocturnin	protein_coding	0.76	1.63	0.00687729	0.00342614	0.51	0.00642892
TTC39A	ENSG00000085831	tetratricopeptide repeat domain 39A	protein_coding	0.77	6.15	0.000310762	0.00101768	0.65	0.000102275
DVL1	ENSG00000107404	dishevelled segment polarity protein 1	protein_coding	0.77	6.36	4.68484e-05	0.000114847	0.75	1.31492e-06
NPDC1	ENSG00000107281	neural proliferation, differentiation and control 1	protein_coding	0.77	8.32	0.0136823	0.00342614	0.39	0.0680532
FNIP2	ENSG00000052795	folliculin interacting protein 2	protein_coding	0.81	5.97	0.00351479	0.0343796	0.44	0.0264368
PIGM	ENSG00000143315	phosphatidylinositol glycan anchor biosynthesis class M	protein_coding	0.82	5.53	1.27904e-06	0.000114847	0.78	2.50802e-07
BCAT2	ENSG00000105552	branched chain amino acid transaminase 2	protein_coding	0.82	6.21	4.65411e-05	0.000346309	0.69	2.63586e-05
LRBA	ENSG00000198589	LPS responsive beige-like anchor protein	protein_coding	0.84	7.39	8.39016e-05	0.000114847	0.65	0.000102275
SASH1	ENSG00000111961	SAM and SH3 domain containing 1	protein_coding	0.85	6.26	0.000677359	0.000202437	0.62	0.000385369
SLC25A39	ENSG00000013306	solute carrier family 25 member 39	protein_coding	0.87	7.42	0.000220252	0.000275416	0.63	0.000251428
DHCR24	ENSG00000116133	24-dehydrocholesterol reductase	protein_coding	0.87	9.81	0.029857	0.00292962	0.57	0.00140874
SND1	ENSG00000197157	staphylococcal nuclease and tudor domain containing 1	protein_coding	0.87	8.75	3.28161e-06	0.000275416	0.75	1.62234e-06
CEACAM19	ENSG00000186567	CEA cell adhesion molecule 19	protein_coding	0.88	2.75	0.0348243	0.0248585	0.3	0.195153
ELK4	ENSG00000158711	ETS transcription factor ELK4	protein_coding	0.88	7.34	0.00880247	0.046735	0.42	0.0361563
ITPR2	ENSG00000123104	inositol 1,4,5-trisphosphate receptor type 2	protein_coding	0.89	6.1	0.0093309	0.00466188	0.46	0.0176326
EEF2	ENSG00000167658	eukaryotic translation elongation factor 2	protein_coding	0.92	12.01	2.78153e-08	0.000114847	0.84	9.48803e-09
SHROOM3	ENSG00000138771	shroom family member 3	protein_coding	0.92	7.36	0.000195253	0.00149145	0.56	0.00201302
APRT	ENSG00000198931	adenine phosphoribosyltransferase	protein_coding	0.94	6.99	0.000176106	0.00123271	0.59	0.000853427
WWC1	ENSG00000113645	WW and C2 domain containing 1	protein_coding	0.95	6.92	3.21653e-05	0.000551112	0.71	8.43322e-06
KIF11	ENSG00000138160	kinesin family member 11	protein_coding	0.96	2.53	0.000565523	0.00178359	0.54	0.00316034
XPO6	ENSG00000169180	exportin 6	protein_coding	0.98	6.91	1.92067e-06	0.000114847	0.83	1.23181e-08
ATP2C1	ENSG00000017260	ATPase secretory pathway Ca2+ transporting 1	protein_coding	0.98	8.51	0.000102264	0.000684911	0.68	3.16136e-05
TET3	ENSG00000187605	tet methylcytosine dioxygenase 3	protein_coding	1	4.98	9.74347e-05	0.000114847	0.66	7.44181e-05
MYC	ENSG00000136997	MYC proto-oncogene, bHLH transcription factor	protein_coding	1.01	6.66	0.0201793	0.0198496	0.61	0.000440939
CBX2	ENSG00000173894	chromobox 2	protein_coding	1.05	1.33	0.00373033	0.0198496	0.55	0.00283429
ODC1	ENSG00000115758	ornithine decarboxylase 1	protein_coding	1.07	8.2	0.000920899	0.00828562	0.59	0.000751544
MTHFD2	ENSG00000065911	methylenetetrahydrofolate dehydrogenase (NADP+ dependent) 2, methenyltetrahydrofolate cyclohydrolase	protein_coding	1.09	5.58	8.88415e-07	0.000439058	0.78	2.50802e-07
TP53INP1	ENSG00000164938	tumor protein p53 inducible nuclear protein 1	protein_coding	1.1	6.9	6.00178e-06	0.000684911	0.7	1.82219e-05
CABP4	ENSG00000175544	calcium binding protein 4	protein_coding	1.11	1.96	0.000919324	0.00342614	0.54	0.00316034
MAZ	ENSG00000103495	MYC associated zinc finger protein	protein_coding	1.11	6.55	5.87124e-07	0.000161482	0.75	1.31492e-06
ACACA	ENSG00000278540	acetyl-CoA carboxylase alpha	protein_coding	1.14	8.14	1.024e-06	0.000114847	0.74	3.09184e-06
IMPDH2	ENSG00000178035	inosine monophosphate dehydrogenase 2	protein_coding	1.16	7.77	4.27492e-07	0.000275416	0.74	3.09184e-06
ACLY	ENSG00000131473	ATP citrate lyase	protein_coding	1.17	8.66	1.5547e-05	0.000114847	0.76	1.05578e-06
TTLL12	ENSG00000100304	tubulin tyrosine ligase like 12	protein_coding	1.18	6.87	1.50591e-07	0.000114847	0.78	3.19515e-07
UAP1	ENSG00000117143	UDP-N-acetylglucosamine pyrophosphorylase 1	protein_coding	1.21	7.18	9.06518e-06	0.00178359	0.69	2.19814e-05
DUS1L	ENSG00000169718	dihydrouridine synthase 1 like	protein_coding	1.24	7.18	1.51711e-06	0.000439058	0.78	2.50802e-07
TMEM184A	ENSG00000164855	transmembrane protein 184A	protein_coding	1.29	5.38	2.04884e-05	0.00149145	0.74	3.09184e-06
AGMAT	ENSG00000116771	agmatinase	protein_coding	1.3	1.31	0.000167638	0.00292962	0.64	0.000188327
H2BC12	ENSG00000197903	H2B clustered histone 12	protein_coding	1.32	5.31	2.05168e-06	0.000202437	0.73	4.62163e-06
SLC12A8	ENSG00000221955	solute carrier family 12 member 8	protein_coding	1.32	4.18	3.48958e-06	0.000114847	0.8	1.17963e-07
RAB3B	ENSG00000169213	RAB3B, member RAS oncogene family	protein_coding	1.42	7.73	0.0133635	0.000202437	0.68	3.16136e-05
H1-2	ENSG00000187837	H1,2 linker histone, cluster member	protein_coding	1.56	7.28	0.00027564	0.00720585	0.52	0.00527351
COLEC12	ENSG00000158270	collectin subfamily member 12	protein_coding	1.58	6.43	6.26897e-05	0.000275416	0.73	4.62163e-06
SAPCD2	ENSG00000186193	suppressor APC domain containing 2	protein_coding	1.61	4.63	4.38084e-05	0.000114847	0.79	1.56698e-07
KIF18B	ENSG00000186185	kinesin family member 18B	protein_coding	1.63	-0.32	0.000395678	0.00178359	0.59	0.000751544
BIRC5	ENSG00000089685	baculoviral IAP repeat containing 5	protein_coding	1.81	1.73	2.57436e-06	0.000161482	0.77	6.59659e-07
LRFN1	ENSG00000128011	leucine rich repeat and fibronectin type III domain containing 1	protein_coding	1.82	2.65	6.91968e-08	0.000114847	0.87	1.68462e-09
COL12A1	ENSG00000111799	collagen type XII alpha 1 chain	protein_coding	1.83	7.74	0.00324961	0.0310182	0.28	0.249895
PPM1E	ENSG00000175175	protein phosphatase, Mg2+/Mn2+ dependent 1E	protein_coding	1.93	4.09	0.00042774	0.000114847	0.74	3.09184e-06
TRIM36	ENSG00000152503	tripartite motif containing 36	protein_coding	1.93	5.25	3.49417e-06	0.000114847	0.83	1.23181e-08
TRIB1	ENSG00000173334	tribbles pseudokinase 1	protein_coding	2.08	8.05	0.000420401	0.000114847	0.71	8.43322e-06
SMS	ENSG00000102172	spermine synthase	protein_coding	2.11	8.82	3.18866e-05	0.00292962	0.59	0.000751544
ALDH3B2	ENSG00000132746	aldehyde dehydrogenase 3 family member B2	protein_coding	2.12	5.31	0.000135427	0.00292962	0.71	1.24515e-05
FASN	ENSG00000169710	fatty acid synthase	protein_coding	2.13	10.23	8.46085e-07	0.000114847	0.78	4.08922e-07
SMPDL3B	ENSG00000130768	sphingomyelin phosphodiesterase acid like 3B	protein_coding	2.38	4.48	2.19381e-10	0.000114847	0.86	1.93558e-09
MON1B	ENSG00000103111	MON1 homolog B, secretory trafficking associated	protein_coding	2.92	8.45	2.24968e-06	0.000114847	0.74	3.09184e-06
DLX2	ENSG00000115844	distal-less homeobox 2	protein_coding	5.51	0.76	1.4969e-08	0.000275416	0.81	3.89567e-08

## Sheet: miR_423_5p
Gene name	Gene id	Description	Biotype	LogFC		LogCPM	QLF_FDR	MW_FDR	Spearman_correlation_coef	Spearman_correlation_FDR
SALL1	ENSG00000103449	spalt like transcription factor 1	protein_coding	-2.55	0.170755	1.11	0.000651356	0.00943724	-0.4	0.0517625
PCSK9	ENSG00000169174	proprotein convertase subtilisin/kexin type 9	protein_coding	-2.33	0.198884	-1.65	2.10439e-05	0.00123271	-0.72	6.9242e-06
SLC2A5	ENSG00000142583	solute carrier family 2 member 5	protein_coding	-2.3	0.203063	4.83	0.000318669	0.00292962	-0.58	0.00125093
DUSP2	ENSG00000158050	dual specificity phosphatase 2	protein_coding	-2.21	0.216134	5.12	0.00289526	0.00292962	-0.33	0.137342
PCP4L1	ENSG00000248485	Purkinje cell protein 4 like 1	protein_coding	-2.2	0.217638	2.95	2.03271e-05	0.00101768	-0.79	1.97784e-07
APOBEC3C	ENSG00000244509	apolipoprotein B mRNA editing enzyme catalytic subunit 3C	protein_coding	-2.12	0.230047	6.09	5.9078e-07	0.000114847	-0.83	1.6778e-08
SMOC1	ENSG00000198732	SPARC related modular calcium binding 1	protein_coding	-2.06	0.239816	6.08	2.11105e-05	0.000346309	-0.72	6.9242e-06
AJAP1	ENSG00000196581	adherens junctions associated protein 1	protein_coding	-1.95	0.258816	2.31	0.00124421	0.0381054	-0.37	0.0817378
FOXQ1	ENSG00000164379	forkhead box Q1	protein_coding	-1.92	0.264255	3.09	0.00100175	0.0157167	-0.6	0.000578472
ADAMTS5	ENSG00000154736	ADAM metallopeptidase with thrombospondin type 1 motif 5	protein_coding	-1.84	0.279322	4.1	0.000201918	0.000829385	-0.67	6.29447e-05
CCDC85A	ENSG00000055813	coiled-coil domain containing 85A	protein_coding	-1.83	0.281265	0.95	4.61328e-05	0.000114847	-0.68	4.49206e-05
IGDCC4	ENSG00000103742	immunoglobulin superfamily DCC subclass member 4	protein_coding	-1.82	0.283221	1.07	0.00526634	0.00623949	-0.56	0.00178661
TPM2	ENSG00000198467	tropomyosin 2	protein_coding	-1.82	0.283221	9.99	2.12744e-05	0.000275416	-0.73	4.62163e-06
C10orf55	ENSG00000222047	chromosome 10 putative open reading frame 55	lncRNA	-1.79	0.289172	-1.4	0.000118614	0.000161482	-0.71	1.02659e-05
TAGLN	ENSG00000149591	transgelin	protein_coding	-1.78	0.291183	10.94	9.97762e-06	0.000275416	-0.74	2.49306e-06
KCNK3	ENSG00000171303	potassium two pore domain channel subfamily K member 3	protein_coding	-1.73	0.301452	5.61	0.000486269	0.00720585	-0.64	0.000188327
ADGRG6	ENSG00000112414	adhesion G protein-coupled receptor G6	protein_coding	-1.69	0.309927	4.01	0.00040603	0.00178359	-0.67	5.31846e-05
ACTA2	ENSG00000107796	actin alpha 2, smooth muscle	protein_coding	-1.68	0.312083	10.73	1.97598e-05	0.000275416	-0.75	1.62234e-06
RPRM	ENSG00000177519	reprimo, TP53 dependent G2 arrest mediator homolog	protein_coding	-1.67	0.314253	2.44	5.70767e-06	0.000829385	-0.75	1.62234e-06
CDH2	ENSG00000170558	cadherin 2	protein_coding	-1.65	0.31864	3.12	0.0107401	0.00249166	-0.52	0.00584249
TGFB1I1	ENSG00000140682	transforming growth factor beta 1 induced transcript 1	protein_coding	-1.64	0.320856	6.33	1.1982e-05	0.000346309	-0.76	1.05578e-06
HSPB7	ENSG00000173641	heat shock protein family B (small) member 7	protein_coding	-1.61	0.327598	5.28	0.0023573	0.00828562	-0.6	0.000578472
DDIT4	ENSG00000168209	DNA damage inducible transcript 4	protein_coding	-1.6	0.329877	6.18	3.31145e-05	0.000161482	-0.66	7.44181e-05
RNF165	ENSG00000141622	ring finger protein 165	protein_coding	-1.59	0.332171	2.77	3.2397e-05	0.000114847	-0.74	2.49306e-06
WFIKKN2	ENSG00000173714	WAP, follistatin/kazal, immunoglobulin, kunitz and netrin domain containing 2	protein_coding	-1.54	0.343885	0.01	7.30059e-05	0.000346309	-0.71	1.24515e-05
LIMS2	ENSG00000072163	LIM zinc finger domain containing 2	protein_coding	-1.5	0.353553	6.61	6.29558e-05	0.00149145	-0.72	6.9242e-06
IGF2	ENSG00000167244	insulin like growth factor 2	protein_coding	-1.5	0.353553	5.14	0.00105369	0.00720585	-0.6	0.000658982
PLS3	ENSG00000102024	plastin 3	protein_coding	-1.49	0.356013	5.24	1.24047e-06	0.000114847	-0.81	6.7957e-08
PALLD	ENSG00000129116	palladin, cytoskeletal associated protein	protein_coding	-1.49	0.356013	8.77	8.44563e-05	0.000275416	-0.71	1.02659e-05
STOX2	ENSG00000173320	storkhead box 2	protein_coding	-1.48	0.358489	3.13	1.77817e-05	0.000114847	-0.78	3.19515e-07
HOXA7	ENSG00000122592	homeobox A7	protein_coding	-1.46	0.363493	0.77	0.000114773	0.000346309	-0.71	1.24515e-05
RAB34	ENSG00000109113	RAB34, member RAS oncogene family	protein_coding	-1.45	0.366021	5.72	1.4197e-07	0.000114847	-0.83	1.6778e-08
ZNF516	ENSG00000101493	zinc finger protein 516	protein_coding	-1.45	0.366021	5.1	5.9078e-07	0.000114847	-0.81	6.7957e-08
ATP2B4	ENSG00000058668	ATPase plasma membrane Ca2+ transporting 4	protein_coding	-1.44	0.368567	7.59	0.000146172	0.000551112	-0.68	3.76404e-05
UCHL1	ENSG00000154277	ubiquitin C-terminal hydrolase L1	protein_coding	-1.42	0.373712	3.35	0.00102929	0.00943724	-0.54	0.00316034
MAP1B	ENSG00000131711	microtubule associated protein 1B	protein_coding	-1.41	0.376312	7.61	0.00200377	0.00398843	-0.58	0.00110189
PLEKHA2	ENSG00000169499	pleckstrin homology domain containing A2	protein_coding	-1.41	0.376312	5.23	1.0624e-06	0.000114847	-0.78	3.19515e-07
STRIP2	ENSG00000128578	striatin interacting protein 2	protein_coding	-1.4	0.378929	1.39	0.00629087	0.0278207	-0.42	0.0361563
HACD1	ENSG00000165996	3-hydroxyacyl-CoA dehydratase 1	protein_coding	-1.4	0.378929	3.11	4.75234e-07	0.000114847	-0.78	2.50802e-07
ASCL2	ENSG00000183734	achaete-scute family bHLH transcription factor 2	protein_coding	-1.39	0.381565	1.79	0.0283557	0.00249166	-0.55	0.00253493
GRID1	ENSG00000182771	glutamate ionotropic receptor delta type subunit 1	protein_coding	-1.36	0.389582	1.67	1.96681e-05	0.000684911	-0.66	8.72349e-05
EMP3	ENSG00000142227	epithelial membrane protein 3	protein_coding	-1.36	0.389582	4.29	7.70101e-06	0.000275416	-0.73	3.7856e-06
PMP22	ENSG00000109099	peripheral myelin protein 22	protein_coding	-1.35	0.392292	5.49	1.82519e-05	0.000114847	-0.71	1.02659e-05
ST3GAL1	ENSG00000008513	ST3 beta-galactoside alpha-2,3-sialyltransferase 1	protein_coding	-1.34	0.395021	5.01	4.14388e-05	0.000829385	-0.65	0.000102275
ANO6	ENSG00000177119	anoctamin 6	protein_coding	-1.33	0.397768	6.63	0.000112472	0.000202437	-0.7	1.50087e-05
CCND2	ENSG00000118971	cyclin D2	protein_coding	-1.31	0.403321	6.64	0.00131613	0.00123271	-0.64	0.000188327
NCS1	ENSG00000107130	neuronal calcium sensor 1	protein_coding	-1.31	0.403321	6.42	1.43663e-05	0.000439058	-0.75	1.62234e-06
EHD2	ENSG00000024422	EH domain containing 2	protein_coding	-1.29	0.408951	7.04	0.000198125	0.00292962	-0.65	0.000102275
TNIK	ENSG00000154310	TRAF2 and NCK interacting kinase	protein_coding	-1.28	0.411796	3.5	0.00447722	0.00398843	-0.54	0.00352187
TIMP3	ENSG00000100234	TIMP metallopeptidase inhibitor 3	protein_coding	-1.26	0.417544	3.79	0.0040439	0.00292962	-0.55	0.00283429
REEP1	ENSG00000068615	receptor accessory protein 1	protein_coding	-1.26	0.417544	3.86	6.90586e-05	0.000551112	-0.66	8.72349e-05
PPARGC1B	ENSG00000155846	PPARG coactivator 1 beta	protein_coding	-1.24	0.423373	3.41	0.000453763	0.000551112	-0.6	0.000578472
PNMA8B	ENSG00000204851	PNMA family member 8B	protein_coding	-1.22	0.429283	1.74	0.000800225	0.00292962	-0.6	0.000578472
ITGA5	ENSG00000161638	integrin subunit alpha 5	protein_coding	-1.2	0.435275	7.12	0.00273337	0.00466188	-0.46	0.0176326
RPS6KL1	ENSG00000198208	ribosomal protein S6 kinase like 1	protein_coding	-1.19	0.438303	1.53	0.000267142	0.000551112	-0.67	5.31846e-05
NID1	ENSG00000116962	nidogen 1	protein_coding	-1.17	0.444421	6.3	0.00321155	0.0122064	-0.5	0.00859453
TNFRSF10D	ENSG00000173530	TNF receptor superfamily member 10d	protein_coding	-1.17	0.444421	2.54	0.000612106	0.00210559	-0.57	0.00140874
CITED4	ENSG00000179862	Cbp/p300 interacting transactivator with Glu/Asp rich carboxy-terminal domain 4	protein_coding	-1.17	0.444421	4.04	0.000250184	0.000114847	-0.65	0.000139193
TSPAN7	ENSG00000156298	tetraspanin 7	protein_coding	-1.16	0.447513	4.44	0.000555788	0.000202437	-0.62	0.000290506
STARD4	ENSG00000164211	StAR related lipid transfer domain containing 4	protein_coding	-1.16	0.447513	4.64	0.0029546	0.0157167	-0.43	0.0335038
RBM38	ENSG00000132819	RNA binding motif protein 38	protein_coding	-1.15	0.450625	5.17	1.63521e-05	0.000829385	-0.71	1.02659e-05
ASPH	ENSG00000198363	aspartate beta-hydroxylase	protein_coding	-1.14	0.45376	6.64	1.91944e-05	0.000114847	-0.77	6.59659e-07
RARG	ENSG00000172819	retinoic acid receptor gamma	protein_coding	-1.13	0.456916	4.71	9.34622e-05	0.000829385	-0.7	1.50087e-05
CDK15	ENSG00000138395	cyclin dependent kinase 15	protein_coding	-1.1	0.466516	0.01	0.0287503	0.0222625	-0.38	0.07264
MYOF	ENSG00000138119	myoferlin	protein_coding	-1.1	0.466516	7.26	0.000132239	0.000829385	-0.67	5.31846e-05
CORO1C	ENSG00000110880	coronin 1C	protein_coding	-1.05	0.482968	6.6	6.48766e-05	0.000684911	-0.69	2.63586e-05
CDCA7	ENSG00000144354	cell division cycle associated 7	protein_coding	-1.04	0.486327	2.27	0.0058309	0.00828562	-0.55	0.00253493
MMP2	ENSG00000087245	matrix metallopeptidase 2	protein_coding	-1.04	0.486327	7.2	0.000337394	0.00178359	-0.61	0.000506304
COL4A2	ENSG00000134871	collagen type IV alpha 2 chain	protein_coding	-1.01	0.496546	8.72	0.00729317	0.0222625	-0.47	0.0148392
PFKFB3	ENSG00000170525	6-phosphofructo-2-kinase/fructose-2,6-biphosphatase 3	protein_coding	-1	0.5	5.62	0.00340312	0.0107531	-0.48	0.0135942
KIRREL1	ENSG00000183853	kirre like nephrin family adhesion molecule 1	protein_coding	-1	0.5	5.17	0.00129721	0.00342614	-0.57	0.00140874
FADS1	ENSG00000149485	fatty acid desaturase 1	protein_coding	-0.99	0.503478	5.62	0.000783437	0.000275416	-0.59	0.000853427
SH3PXD2A	ENSG00000107957	SH3 and PX domains 2A	protein_coding	-0.99	0.503478	6.15	4.48658e-05	0.00123271	-0.65	0.000139193
SLC9A1	ENSG00000090020	solute carrier family 9 member A1	protein_coding	-0.97	0.510506	6.43	0.0104557	0.046735	-0.44	0.0264368
ZFP36L1	ENSG00000185650	ZFP36 ring finger protein like 1	protein_coding	-0.94	0.521233	8.67	0.00354495	0.00466188	-0.53	0.00431149
MICALL1	ENSG00000100139	MICAL like 1	protein_coding	-0.94	0.521233	5.8	1.8847e-06	0.000346309	-0.75	1.31492e-06
ARL10	ENSG00000175414	ADP ribosylation factor like GTPase 10	protein_coding	-0.94	0.521233	3	0.000353031	0.000346309	-0.65	0.000139193
CD81	ENSG00000110651	CD81 molecule	protein_coding	-0.92	0.528509	9.92	0.00134392	0.00342614	-0.52	0.00477303
TEAD1	ENSG00000187079	TEA domain transcription factor 1	protein_coding	-0.92	0.528509	6.43	0.00180168	0.00149145	-0.55	0.00253493
IGFBP4	ENSG00000141753	insulin like growth factor binding protein 4	protein_coding	-0.92	0.528509	8.3	0.000389385	0.000161482	-0.63	0.000217888
CELSR2	ENSG00000143126	cadherin EGF LAG seven-pass G-type receptor 2	protein_coding	-0.91	0.532185	5.51	0.00114985	0.00398843	-0.57	0.00140874
DST	ENSG00000151914	dystonin	protein_coding	-0.91	0.532185	7.74	0.00528356	0.0198496	-0.53	0.00389508
MMP17	ENSG00000198598	matrix metallopeptidase 17	protein_coding	-0.9	0.535887	0.66	0.0150334	0.00466188	-0.48	0.0124192
PAK1	ENSG00000149269	p21 (RAC1) activated kinase 1	protein_coding	-0.89	0.539614	5.58	0.000513773	0.00720585	-0.65	0.000139193
NFASC	ENSG00000163531	neurofascin	protein_coding	-0.89	0.539614	5.17	0.0383798	0.0343796	-0.36	0.0927924
TACC1	ENSG00000147526	transforming acidic coiled-coil containing protein 1	protein_coding	-0.89	0.539614	7.79	0.00160834	0.000346309	-0.56	0.00178661
RAB23	ENSG00000112210	RAB23, member RAS oncogene family	protein_coding	-0.89	0.539614	5.26	0.00500028	0.00537948	-0.45	0.0245123
PHF19	ENSG00000119403	PHD finger protein 19	protein_coding	-0.87	0.547147	4.66	0.000188185	0.00101768	-0.62	0.000385369
RHOB	ENSG00000143878	ras homolog family member B	protein_coding	-0.86	0.550953	9.3	0.00876599	0.00149145	-0.57	0.00158563
NKD2	ENSG00000145506	NKD inhibitor of WNT signaling pathway 2	protein_coding	-0.86	0.550953	1.8	0.011471	0.0176367	-0.45	0.0208349
SLC6A6	ENSG00000131389	solute carrier family 6 member 6	protein_coding	-0.85	0.554785	4.35	0.000808158	0.000684911	-0.58	0.00110189
ARHGEF2	ENSG00000116584	Rho/Rac guanine nucleotide exchange factor 2	protein_coding	-0.85	0.554785	4.96	0.000144811	0.000684911	-0.65	0.000119183
TSPAN3	ENSG00000140391	tetraspanin 3	protein_coding	-0.85	0.554785	7.56	0.00217086	0.00249166	-0.52	0.00477303
TRMT9B	ENSG00000250305	tRNA methyltransferase 9B (putative)	protein_coding	-0.83	0.562529	1.85	0.0120096	0.0421612	-0.4	0.0517625
TPST2	ENSG00000128294	tyrosylprotein sulfotransferase 2	protein_coding	-0.82	0.566442	5.04	0.00668988	0.0222625	-0.43	0.0310185
AXL	ENSG00000167601	AXL receptor tyrosine kinase	protein_coding	-0.82	0.566442	5.55	0.00192561	0.00342614	-0.55	0.00283429
ARL4C	ENSG00000188042	ADP ribosylation factor like GTPase 4C	protein_coding	-0.82	0.566442	4.84	0.00869606	0.0278207	-0.49	0.00942878
MFGE8	ENSG00000140545	milk fat globule EGF and factor V/VIII domain containing	protein_coding	-0.81	0.570382	6.74	0.00471004	0.00466188	-0.52	0.00477303
IER5	ENSG00000162783	immediate early response 5	protein_coding	-0.81	0.570382	4.3	0.0129178	0.00943724	-0.52	0.00527351
COL9A3	ENSG00000092758	collagen type IX alpha 3 chain	protein_coding	-0.79	0.578344	0.72	0.0342009	0.00943724	-0.46	0.0192099
RIN3	ENSG00000100599	Ras and Rab interactor 3	protein_coding	-0.78	0.582367	4.28	0.00716911	0.0122064	-0.5	0.00859453
STING1	ENSG00000184584	stimulator of interferon response cGAMP interactor 1	protein_coding	-0.78	0.582367	5.37	0.00917768	0.00943724	-0.54	0.00352187
NDE1	ENSG00000072864	nudE neurodevelopment protein 1	protein_coding	-0.77	0.586417	4.49	0.000619096	0.00292962	-0.64	0.000188327
TLN1	ENSG00000137076	talin 1	protein_coding	-0.77	0.586417	9.3	0.00224077	0.0222625	-0.53	0.00431149
KLHL3	ENSG00000146021	kelch like family member 3	protein_coding	-0.77	0.586417	2.27	0.0182887	0.00537948	-0.45	0.0226107
ALDOC	ENSG00000109107	aldolase, fructose-bisphosphate C	protein_coding	-0.76	0.590496	4.48	0.00100379	0.00249166	-0.62	0.000290506
AHDC1	ENSG00000126705	AT-hook DNA binding motif containing 1	protein_coding	-0.76	0.590496	5.11	0.000401564	0.00178359	-0.64	0.000188327
RGL1	ENSG00000143344	ral guanine nucleotide dissociation stimulator like 1	protein_coding	-0.76	0.590496	5.06	0.0107339	0.0198496	-0.48	0.0124192
LPCAT4	ENSG00000176454	lysophosphatidylcholine acyltransferase 4	protein_coding	-0.76	0.590496	4.01	0.000569983	0.000439058	-0.61	0.000440939
NANOS1	ENSG00000188613	nanos C2HC-type zinc finger 1	protein_coding	-0.74	0.598739	0.53	0.0109055	0.0107531	-0.46	0.0192099
NR3C1	ENSG00000113580	nuclear receptor subfamily 3 group C member 1	protein_coding	-0.73	0.602904	6.16	0.000335301	0.000551112	-0.63	0.000217888
IVNS1ABP	ENSG00000116679	influenza virus NS1A binding protein	protein_coding	-0.73	0.602904	6.85	0.00719892	0.0421612	-0.39	0.0680532
MTSS2	ENSG00000132613	MTSS I-BAR domain containing 2	protein_coding	-0.73	0.602904	4.55	0.000137517	0.000829385	-0.7	1.50087e-05
RAP1A	ENSG00000116473	RAP1A, member of RAS oncogene family	protein_coding	-0.72	0.607097	6.5	9.1185e-05	0.000114847	-0.7	1.82219e-05
HLA-DOA	ENSG00000204252	major histocompatibility complex, class II, DO alpha	protein_coding	-0.71	0.61132	4.56	0.028265	0.0343796	-0.46	0.0176326
ZNF655	ENSG00000197343	zinc finger protein 655	protein_coding	-0.7	0.615572	5.56	0.0281837	0.0157167	-0.48	0.0135942
TXNIP	ENSG00000265972	thioredoxin interacting protein	protein_coding	-0.7	0.615572	9.27	0.00133196	0.000684911	-0.6	0.000578472
CALM1	ENSG00000198668	calmodulin 1	protein_coding	-0.7	0.615572	8.78	8.17359e-05	0.000202437	-0.68	3.76404e-05
ZYX	ENSG00000159840	zyxin	protein_coding	-0.69	0.619854	7.42	0.00458339	0.00720585	-0.54	0.00352187
CBX6	ENSG00000183741	chromobox 6	protein_coding	-0.68	0.624165	6.96	0.00395733	0.00720585	-0.54	0.00352187
CEBPB	ENSG00000172216	CCAAT enhancer binding protein beta	protein_coding	-0.67	0.628507	5.21	0.0241402	0.00720585	-0.45	0.0226107
ACTB	ENSG00000075624	actin beta	protein_coding	-0.66	0.632878	12.03	0.00112426	0.00292962	-0.56	0.00201302
SESTD1	ENSG00000187231	SEC14 and spectrin domain containing 1	protein_coding	-0.66	0.632878	4.97	0.00172198	0.000684911	-0.59	0.000751544
MTURN	ENSG00000180354	maturin, neural progenitor differentiation regulator homolog	protein_coding	-0.65	0.63728	6.22	0.00807313	0.00398843	-0.52	0.00527351
SMAD7	ENSG00000101665	SMAD family member 7	protein_coding	-0.64	0.641713	4.7	0.004074	0.00342614	-0.53	0.00431149
RCOR3	ENSG00000117625	REST corepressor 3	protein_coding	-0.64	0.641713	5.81	1.78058e-05	0.000202437	-0.76	1.05578e-06
ENAH	ENSG00000154380	ENAH actin regulator	protein_coding	-0.63	0.646176	7.47	0.000612031	0.00149145	-0.58	0.00110189
PLCB1	ENSG00000182621	phospholipase C beta 1	protein_coding	-0.62	0.650671	5.27	0.0111575	0.0176367	-0.38	0.07264
TRPS1	ENSG00000104447	transcriptional repressor GATA binding 1	protein_coding	-0.61	0.655197	5.25	0.0407327	0.00828562	-0.37	0.0817378
RARA	ENSG00000131759	retinoic acid receptor alpha	protein_coding	-0.61	0.655197	5.24	0.00460535	0.00943724	-0.52	0.00584249
SPTBN1	ENSG00000115306	spectrin beta, non-erythrocytic 1	protein_coding	-0.61	0.655197	8.82	0.0139989	0.00623949	-0.37	0.0871232
SHMT1	ENSG00000176974	serine hydroxymethyltransferase 1	protein_coding	-0.59	0.664343	4.78	0.00569876	0.0107531	-0.48	0.0135942
SYNGR1	ENSG00000100321	synaptogyrin 1	protein_coding	-0.59	0.664343	5.52	0.0177833	0.0421612	-0.5	0.00859453
EIF4EBP2	ENSG00000148730	eukaryotic translation initiation factor 4E binding protein 2	protein_coding	-0.59	0.664343	7.36	0.000461204	0.000161482	-0.63	0.000251428
PDE4D	ENSG00000113448	phosphodiesterase 4D	protein_coding	-0.58	0.668964	6.03	0.00681744	0.00292962	-0.54	0.00352187
GLCE	ENSG00000138604	glucuronic acid epimerase	protein_coding	-0.56	0.678302	4.64	0.00465352	0.00178359	-0.54	0.00316034
NOD1	ENSG00000106100	nucleotide binding oligomerization domain containing 1	protein_coding	-0.56	0.678302	2.61	0.0191132	0.00943724	-0.43	0.0335038
STAT5B	ENSG00000173757	signal transducer and activator of transcription 5B	protein_coding	-0.55	0.68302	6.7	0.000260905	0.00101768	-0.7	1.50087e-05
GPSM3	ENSG00000213654	G protein signaling modulator 3	protein_coding	-0.55	0.68302	3.35	0.0397506	0.0248585	-0.42	0.0389042
EPB41L1	ENSG00000088367	erythrocyte membrane protein band 4,1 like 1	protein_coding	-0.54	0.687771	6.13	0.00052705	0.00292962	-0.65	0.000139193
ITPRIP	ENSG00000148841	inositol 1,4,5-trisphosphate receptor interacting protein	protein_coding	-0.53	0.692555	5.51	0.00801006	0.0381054	-0.48	0.0135942
MPP1	ENSG00000130830	membrane palmitoylated protein 1	protein_coding	-0.53	0.692555	4.97	0.00521531	0.00537948	-0.53	0.00431149
SEPTIN9	ENSG00000184640	septin 9	protein_coding	-0.52	0.697372	8.05	0.00904601	0.0248585	-0.49	0.0103209
PIP5K1C	ENSG00000186111	phosphatidylinositol-4-phosphate 5-kinase type 1 gamma	protein_coding	-0.52	0.697372	6.75	0.0102048	0.0278207	-0.43	0.0310185
MAPK7	ENSG00000166484	mitogen-activated protein kinase 7	protein_coding	-0.51	0.702222	4.19	0.00167957	0.00210559	-0.57	0.00140874
NFE2L2	ENSG00000116044	nuclear factor, erythroid 2 like 2	protein_coding	-0.5	0.707107	6.93	0.00201154	0.00123271	-0.63	0.000217888
MFN2	ENSG00000116688	mitofusin 2	protein_coding	-0.5	0.707107	7.31	0.00448226	0.00342614	-0.55	0.00253493
KANSL3	ENSG00000114982	KAT8 regulatory NSL complex subunit 3	protein_coding	-0.5	0.707107	6.2	0.000115423	0.000346309	-0.7	1.82219e-05
GNG12	ENSG00000172380	G protein subunit gamma 12	protein_coding	-0.49	0.712025	6.9	0.00373918	0.00123271	-0.52	0.00477303
PBXIP1	ENSG00000163346	PBX homeobox interacting protein 1	protein_coding	-0.49	0.712025	7.74	0.0013789	0.00720585	-0.6	0.000658982
NLGN2	ENSG00000169992	neuroligin 2	protein_coding	-0.48	0.716978	5.26	0.0226141	0.046735	-0.49	0.0103209
JADE2	ENSG00000043143	jade family PHD finger 2	protein_coding	-0.48	0.716978	5.69	0.0273877	0.00943724	-0.48	0.0135942
TXNRD1	ENSG00000198431	thioredoxin reductase 1	protein_coding	-0.47	0.721965	6.49	0.0370071	0.0343796	-0.32	0.15115
USP11	ENSG00000102226	ubiquitin specific peptidase 11	protein_coding	-0.47	0.721965	6.58	0.00601284	0.0157167	-0.53	0.00431149
MAPKBP1	ENSG00000137802	mitogen-activated protein kinase binding protein 1	protein_coding	-0.46	0.726986	4.62	0.007047	0.0107531	-0.52	0.00584249
RIC1	ENSG00000107036	RIC1 homolog, RAB6A GEF complex partner 1	protein_coding	-0.46	0.726986	4.61	0.0367196	0.00249166	-0.39	0.0680532
VPS29	ENSG00000111237	VPS29 retromer complex component	protein_coding	-0.45	0.732043	5.76	0.00236135	0.00249166	-0.6	0.000578472
LINC02693	ENSG00000212719	long intergenic non-protein coding RNA 2693	lncRNA	-0.44	0.737135	2.85	0.0221049	0.0278207	-0.52	0.00477303
KLHL21	ENSG00000162413	kelch like family member 21	protein_coding	-0.42	0.747425	6.39	0.0218115	0.0198496	-0.48	0.0124192
PSMB10	ENSG00000205220	proteasome 20S subunit beta 10	protein_coding	-0.42	0.747425	4.41	0.0422899	0.0222625	-0.51	0.00642892
ANKRD42	ENSG00000137494	ankyrin repeat domain 42	protein_coding	-0.41	0.752623	4.05	0.00977396	0.0198496	-0.53	0.00389508
ACTN4	ENSG00000130402	actinin alpha 4	protein_coding	-0.41	0.752623	8.84	0.00674286	0.0107531	-0.54	0.00352187
LDB1	ENSG00000198728	LIM domain binding 1	protein_coding	-0.4	0.757858	5.98	0.00476646	0.00149145	-0.6	0.000658982
PCGF5	ENSG00000180628	polycomb group ring finger 5	protein_coding	-0.39	0.76313	6.18	0.0225793	0.00466188	-0.48	0.0135942
PTEN	ENSG00000171862	phosphatase and tensin homolog	protein_coding	-0.37	0.773782	6.88	0.0344582	0.0107531	-0.39	0.0636183
PKM	ENSG00000067225	pyruvate kinase M1/2	protein_coding	-0.36	0.779165	9.37	0.0058309	0.00249166	-0.53	0.00389508
C22orf39	ENSG00000242259	chromosome 22 open reading frame 39	protein_coding	-0.36	0.779165	5.16	0.0436843	0.0157167	-0.37	0.0871232
SPTAN1	ENSG00000197694	spectrin alpha, non-erythrocytic 1	protein_coding	-0.36	0.779165	8.21	0.0484118	0.0343796	-0.46	0.0176326
ZBTB4	ENSG00000174282	zinc finger and BTB domain containing 4	protein_coding	-0.36	0.779165	7.64	0.0197667	0.0107531	-0.51	0.00642892
FAM131A	ENSG00000175182	family with sequence similarity 131 member A	protein_coding	-0.36	0.779165	4.2	0.0349804	0.0198496	-0.47	0.0161847
SQSTM1	ENSG00000161011	sequestosome 1	protein_coding	-0.35	0.784584	8.02	0.0407278	0.00537948	-0.47	0.0161847
MAP3K7	ENSG00000135341	mitogen-activated protein kinase kinase kinase 7	protein_coding	-0.34	0.790041	5.52	0.0386514	0.00623949	-0.42	0.0416591
DDX24	ENSG00000089737	DEAD-box helicase 24	protein_coding	-0.3	0.812252	7.67	0.0368664	0.0222625	-0.41	0.0481509
GTPBP2	ENSG00000172432	GTP binding protein 2	protein_coding	-0.27	0.82932	4.99	0.0187528	0.000275416	-0.55	0.00225163
PBX2	ENSG00000204304	PBX homeobox 2	protein_coding	-0.26	0.835088	5.89	0.0224754	0.00292962	-0.56	0.00201302
E2F4	ENSG00000205250	E2F transcription factor 4	protein_coding	-0.24	0.846745	5.59	0.0456482	0.00466188	-0.45	0.0208349
U2AF2	ENSG00000063244	U2 small nuclear RNA auxiliary factor 2	protein_coding	0.22	1.16473	7.18	0.0323897	0.000114847	0.55	0.00283429
UBE2Q1	ENSG00000160714	ubiquitin conjugating enzyme E2 Q1	protein_coding	0.22	1.16473	6.15	0.0221058	0.000551112	0.61	0.000506304
AK2	ENSG00000004455	adenylate kinase 2	protein_coding	0.23	1.17283	6.45	0.0475066	0.00537948	0.5	0.00859453
KHSRP	ENSG00000088247	KH-type splicing regulatory protein	protein_coding	0.25	1.18921	7.36	0.0334989	0.000346309	0.53	0.00389508
ATG9A	ENSG00000198925	autophagy related 9A	protein_coding	0.26	1.19748	6.45	0.0454549	0.00720585	0.45	0.0226107
WDR5	ENSG00000196363	WD repeat domain 5	protein_coding	0.26	1.19748	5.38	0.0208696	0.000439058	0.52	0.00527351
RNF10	ENSG00000022840	ring finger protein 10	protein_coding	0.27	1.20581	7.76	0.0388465	0.000684911	0.42	0.0361563
CELF1	ENSG00000149187	CUGBP Elav-like family member 1	protein_coding	0.28	1.21419	6.81	0.0354342	0.0122064	0.52	0.00584249
CSNK1E	ENSG00000213923	casein kinase 1 epsilon	protein_coding	0.29	1.22264	6.89	0.0216555	0.00623949	0.49	0.0113268
HDGF	ENSG00000143321	heparin binding growth factor	protein_coding	0.3	1.23114	7.47	0.00816969	0.00623949	0.58	0.00125093
PMPCA	ENSG00000165688	peptidase, mitochondrial processing subunit alpha	protein_coding	0.3	1.23114	5.81	0.0179246	0.00178359	0.5	0.00781458
TEX261	ENSG00000144043	testis expressed 261	protein_coding	0.3	1.23114	6.95	0.0153424	0.00720585	0.51	0.00642892
LMNB2	ENSG00000176619	lamin B2	protein_coding	0.31	1.23971	5.42	0.0400588	0.0222625	0.51	0.00708093
MKRN1	ENSG00000133606	makorin ring finger protein 1	protein_coding	0.31	1.23971	7.17	0.0148582	0.00178359	0.57	0.00140874
FAM120A	ENSG00000048828	family with sequence similarity 120A	protein_coding	0.31	1.23971	7.86	0.0168001	0.000551112	0.53	0.00389508
BSDC1	ENSG00000160058	BSD domain containing 1	protein_coding	0.31	1.23971	7	0.00380637	0.000202437	0.66	8.72349e-05
MED16	ENSG00000175221	mediator complex subunit 16	protein_coding	0.32	1.24833	6.29	0.0311535	0.00623949	0.47	0.0161847
NIBAN2	ENSG00000136830	niban apoptosis regulator 2	protein_coding	0.33	1.25701	8.18	0.0217559	0.0176367	0.49	0.0113268
INPPL1	ENSG00000165458	inositol polyphosphate phosphatase like 1	protein_coding	0.33	1.25701	6.96	0.00946693	0.00123271	0.6	0.000658982
WDR6	ENSG00000178252	WD repeat domain 6	protein_coding	0.33	1.25701	7.79	0.0197225	0.000551112	0.48	0.0135942
SMPD4	ENSG00000136699	sphingomyelin phosphodiesterase 4	protein_coding	0.33	1.25701	5.88	0.0203721	0.00943724	0.54	0.00316034
KDM5C	ENSG00000126012	lysine demethylase 5C	protein_coding	0.33	1.25701	6.77	0.00759379	0.00178359	0.62	0.000290506
TRIM28	ENSG00000130726	tripartite motif containing 28	protein_coding	0.34	1.26576	8.05	0.0127717	0.000551112	0.49	0.0103209
LETMD1	ENSG00000050426	LETM1 domain containing 1	protein_coding	0.34	1.26576	5.95	0.00393368	0.00249166	0.59	0.000853427
GORASP2	ENSG00000115806	golgi reassembly stacking protein 2	protein_coding	0.35	1.27456	7.01	0.0357983	0.0198496	0.49	0.00942878
MKNK2	ENSG00000099875	MAPK interacting serine/threonine kinase 2	protein_coding	0.36	1.28343	7.9	0.0253909	0.0138685	0.51	0.00642892
PSMD11	ENSG00000108671	proteasome 26S subunit, non-ATPase 11	protein_coding	0.36	1.28343	6.45	0.00316421	0.000684911	0.64	0.000163181
MTCH2	ENSG00000109919	mitochondrial carrier 2	protein_coding	0.36	1.28343	6.29	0.0221547	0.000346309	0.51	0.00642892
UBFD1	ENSG00000103353	ubiquitin family domain containing 1	protein_coding	0.36	1.28343	6.16	0.00305676	0.00101768	0.62	0.000336341
REPS1	ENSG00000135597	RALBP1 associated Eps domain containing 1	protein_coding	0.36	1.28343	5.4	0.00757461	0.00292962	0.6	0.000658982
WDR45B	ENSG00000141580	WD repeat domain 45B	protein_coding	0.36	1.28343	6.92	0.00408372	0.000829385	0.58	0.000970096
SURF4	ENSG00000148248	surfeit 4	protein_coding	0.36	1.28343	8.46	0.00782019	0.00149145	0.53	0.00431149
ZBED1	ENSG00000214717	zinc finger BED-type containing 1	protein_coding	0.36	1.28343	6.36	0.00338008	0.00249166	0.58	0.000970096
IP6K2	ENSG00000068745	inositol hexakisphosphate kinase 2	protein_coding	0.36	1.28343	6.53	0.0112527	0.00537948	0.52	0.00477303
TRIM33	ENSG00000197323	tripartite motif containing 33	protein_coding	0.36	1.28343	6.16	0.0266127	0.00828562	0.39	0.0636183
THRAP3	ENSG00000054118	thyroid hormone receptor associated protein 3	protein_coding	0.36	1.28343	7.86	0.0222058	0.00101768	0.45	0.0245123
MIEF1	ENSG00000100335	mitochondrial elongation factor 1	protein_coding	0.36	1.28343	5.71	0.0130396	0.00101768	0.51	0.00708093
YWHAE	ENSG00000108953	tyrosine 3-monooxygenase/tryptophan 5-monooxygenase activation protein epsilon	protein_coding	0.37	1.29235	9.06	0.0102853	0.00623949	0.53	0.00389508
COPB1	ENSG00000129083	COPI coat complex subunit beta 1	protein_coding	0.37	1.29235	7.6	0.0470398	0.0122064	0.45	0.0226107
SMG7	ENSG00000116698	SMG7 nonsense mediated mRNA decay factor	protein_coding	0.37	1.29235	6.55	0.000892814	0.000114847	0.7	1.50087e-05
IRF2BP1	ENSG00000170604	interferon regulatory factor 2 binding protein 1	protein_coding	0.37	1.29235	5.5	0.0493514	0.0107531	0.38	0.07264
SYNRG	ENSG00000275066	synergin gamma	protein_coding	0.37	1.29235	6.15	0.0301195	0.000114847	0.44	0.0264368
NACC1	ENSG00000160877	nucleus accumbens associated 1	protein_coding	0.38	1.30134	6.2	0.0344238	0.0157167	0.41	0.0481509
DDX54	ENSG00000123064	DEAD-box helicase 54	protein_coding	0.38	1.30134	6.32	0.00256195	0.000346309	0.63	0.000217888
C1orf43	ENSG00000143612	chromosome 1 open reading frame 43	protein_coding	0.38	1.30134	7.72	0.019376	0.00828562	0.63	0.000251428
PRPF19	ENSG00000110107	pre-mRNA processing factor 19	protein_coding	0.38	1.30134	7.62	0.00256658	0.00149145	0.59	0.000853427
PPIA	ENSG00000196262	peptidylprolyl isomerase A	protein_coding	0.39	1.31039	7.79	0.026507	0.0107531	0.46	0.0176326
ZNF609	ENSG00000180357	zinc finger protein 609	protein_coding	0.39	1.31039	6.4	0.0429448	0.00623949	0.49	0.00942878
TEX2	ENSG00000136478	testis expressed 2	protein_coding	0.39	1.31039	6.41	0.00881861	0.00149145	0.54	0.00316034
RAD23B	ENSG00000119318	RAD23 homolog B, nucleotide excision repair protein	protein_coding	0.39	1.31039	7.68	0.00135911	0.00101768	0.66	7.44181e-05
ZSCAN22	ENSG00000182318	zinc finger and SCAN domain containing 22	protein_coding	0.39	1.31039	2.59	0.0310409	0.00292962	0.47	0.0148392
SCAMP2	ENSG00000140497	secretory carrier membrane protein 2	protein_coding	0.4	1.31951	7.11	0.00598439	0.00249166	0.53	0.00431149
STRN4	ENSG00000090372	striatin 4	protein_coding	0.4	1.31951	6.74	0.00298856	0.000439058	0.58	0.000970096
SRP54	ENSG00000100883	signal recognition particle 54	protein_coding	0.4	1.31951	6.17	0.0376687	0.0138685	0.49	0.0113268
SLC11A2	ENSG00000110911	solute carrier family 11 member 2	protein_coding	0.4	1.31951	6.57	0.0196655	0.0157167	0.46	0.0192099
SCAMP3	ENSG00000116521	secretory carrier membrane protein 3	protein_coding	0.4	1.31951	6.28	0.00369484	0.000684911	0.56	0.00178661
NKRF	ENSG00000186416	NFKB repressing factor	protein_coding	0.4	1.31951	3.6	0.00265471	0.000346309	0.68	3.76404e-05
PA2G4	ENSG00000170515	proliferation-associated 2G4	protein_coding	0.41	1.32869	6.9	0.0131089	0.000684911	0.5	0.00781458
RNF187	ENSG00000168159	ring finger protein 187	protein_coding	0.41	1.32869	7.36	0.0104437	0.00101768	0.45	0.0245123
TSC22D4	ENSG00000166925	TSC22 domain family member 4	protein_coding	0.41	1.32869	6.44	0.00648369	0.00943724	0.48	0.0135942
SLC1A5	ENSG00000105281	solute carrier family 1 member 5	protein_coding	0.41	1.32869	8.16	0.0186115	0.00943724	0.43	0.0335038
ANKRD17	ENSG00000132466	ankyrin repeat domain 17	protein_coding	0.41	1.32869	7.07	0.0251171	0.00123271	0.45	0.0208349
CXXC5	ENSG00000171604	CXXC finger protein 5	protein_coding	0.41	1.32869	5.65	0.00960989	0.00537948	0.52	0.00527351
CLPTM1	ENSG00000104853	CLPTM1 regulator of GABA type A receptor forward trafficking	protein_coding	0.41	1.32869	7.51	0.00704093	0.00466188	0.53	0.00389508
ZDHHC18	ENSG00000204160	zinc finger DHHC-type palmitoyltransferase 18	protein_coding	0.41	1.32869	5.07	0.00161556	0.00342614	0.61	0.000506304
NUP58	ENSG00000139496	nucleoporin 58	protein_coding	0.41	1.32869	5.74	0.0090088	0.000551112	0.46	0.0176326
NF2	ENSG00000186575	neurofibromin 2	protein_coding	0.42	1.33793	5.76	0.0228287	0.0138685	0.4	0.0517625
PDPK1	ENSG00000140992	3-phosphoinositide dependent protein kinase 1	protein_coding	0.42	1.33793	5.41	0.029128	0.00537948	0.44	0.0264368
ARL6IP1	ENSG00000170540	ADP ribosylation factor like GTPase 6 interacting protein 1	protein_coding	0.42	1.33793	7.4	0.017108	0.00828562	0.45	0.0226107
CLCN7	ENSG00000103249	chloride voltage-gated channel 7	protein_coding	0.42	1.33793	5.96	0.00116783	0.000829385	0.68	4.49206e-05
AGK	ENSG00000006530	acylglycerol kinase	protein_coding	0.42	1.33793	4.89	0.00138269	0.000202437	0.67	5.31846e-05
MAVS	ENSG00000088888	mitochondrial antiviral signaling protein	protein_coding	0.42	1.33793	7.05	0.018701	0.00101768	0.49	0.00942878
AP1S1	ENSG00000106367	adaptor related protein complex 1 subunit sigma 1	protein_coding	0.43	1.34723	5.58	0.04255	0.0248585	0.48	0.0135942
TRMT2A	ENSG00000099899	tRNA methyltransferase 2 homolog A	protein_coding	0.43	1.34723	5.15	0.0209634	0.00720585	0.4	0.0517625
TRABD	ENSG00000170638	TraB domain containing	protein_coding	0.43	1.34723	5.34	0.0254381	0.0122064	0.54	0.00316034
TXNL4A	ENSG00000141759	thioredoxin like 4A	protein_coding	0.43	1.34723	5.54	0.0168099	0.00537948	0.49	0.0103209
PCNX3	ENSG00000197136	pecanex 3	protein_coding	0.43	1.34723	6.17	0.0090867	0.00149145	0.55	0.00283429
ACTG1	ENSG00000184009	actin gamma 1	protein_coding	0.44	1.3566	11.3	0.01261	0.00720585	0.42	0.0361563
P3H4	ENSG00000141696	prolyl 3-hydroxylase family member 4 (inactive)	protein_coding	0.44	1.3566	5	0.0221621	0.0138685	0.42	0.0361563
POLR3H	ENSG00000100413	RNA polymerase III subunit H	protein_coding	0.45	1.36604	6	0.00326649	0.00943724	0.49	0.0103209
SRSF6	ENSG00000124193	serine and arginine rich splicing factor 6	protein_coding	0.45	1.36604	7.63	0.00617687	0.00342614	0.52	0.00527351
SSR1	ENSG00000124783	signal sequence receptor subunit 1	protein_coding	0.45	1.36604	7.96	0.0033193	0.000829385	0.55	0.00225163
ARID1A	ENSG00000117713	AT-rich interaction domain 1A	protein_coding	0.45	1.36604	7.24	0.0312489	0.00828562	0.42	0.0361563
CREB3L2	ENSG00000182158	cAMP responsive element binding protein 3 like 2	protein_coding	0.45	1.36604	7.35	0.0219154	0.00292962	0.45	0.0208349
PRR14L	ENSG00000183530	proline rich 14 like	protein_coding	0.45	1.36604	5.58	0.0204466	0.00149145	0.46	0.0192099
RPL13A	ENSG00000142541	ribosomal protein L13a	protein_coding	0.45	1.36604	11.24	0.0366407	0.0138685	0.45	0.0226107
MRPL37	ENSG00000116221	mitochondrial ribosomal protein L37	protein_coding	0.45	1.36604	5.95	0.000452292	0.000114847	0.69	2.63586e-05
ECPAS	ENSG00000136813	Ecm29 proteasome adaptor and scaffold	protein_coding	0.45	1.36604	7.54	0.000857788	0.000161482	0.62	0.000385369
DCAF7	ENSG00000136485	DDB1 and CUL4 associated factor 7	protein_coding	0.46	1.37554	7.34	0.00237417	0.000275416	0.58	0.00125093
MAN1B1	ENSG00000177239	mannosidase alpha class 1B member 1	protein_coding	0.46	1.37554	6.58	0.00165835	0.00178359	0.61	0.000440939
CCT5	ENSG00000150753	chaperonin containing TCP1 subunit 5	protein_coding	0.46	1.37554	6.81	0.000817056	0.000275416	0.63	0.000251428
MRPL42	ENSG00000198015	mitochondrial ribosomal protein L42	protein_coding	0.46	1.37554	5.95	0.000333868	0.000114847	0.68	3.16136e-05
ATAT1	ENSG00000137343	alpha tubulin acetyltransferase 1	protein_coding	0.46	1.37554	3.8	0.0135915	0.00828562	0.47	0.0148392
COG3	ENSG00000136152	component of oligomeric golgi complex 3	protein_coding	0.46	1.37554	6.25	0.0141866	0.00623949	0.46	0.0192099
MRRF	ENSG00000148187	mitochondrial ribosome recycling factor	protein_coding	0.46	1.37554	4.57	0.00835241	0.0343796	0.54	0.00352187
YIPF3	ENSG00000137207	Yip1 domain family member 3	protein_coding	0.46	1.37554	7.48	0.000901167	0.000114847	0.61	0.000440939
SLC5A6	ENSG00000138074	solute carrier family 5 member 6	protein_coding	0.47	1.38511	4.81	0.00546573	0.00828562	0.62	0.000385369
CLSTN1	ENSG00000171603	calsyntenin 1	protein_coding	0.47	1.38511	9.01	0.00210021	0.00210559	0.62	0.000336341
CASZ1	ENSG00000130940	castor zinc finger 1	protein_coding	0.47	1.38511	5.95	0.0271433	0.00178359	0.45	0.0208349
PDP2	ENSG00000172840	pyruvate dehyrogenase phosphatase catalytic subunit 2	protein_coding	0.47	1.38511	4.51	0.0121883	0.000551112	0.53	0.00431149
GPAT4	ENSG00000158669	glycerol-3-phosphate acyltransferase 4	protein_coding	0.47	1.38511	6.35	0.011457	0.0122064	0.52	0.00584249
LRRC58	ENSG00000163428	leucine rich repeat containing 58	protein_coding	0.47	1.38511	6.24	0.0032981	0.000346309	0.54	0.00352187
EDC3	ENSG00000179151	enhancer of mRNA decapping 3	protein_coding	0.47	1.38511	5.35	0.000357062	0.000551112	0.69	2.19814e-05
UBA1	ENSG00000130985	ubiquitin like modifier activating enzyme 1	protein_coding	0.47	1.38511	8.63	0.000274104	0.000114847	0.7	1.82219e-05
CAPN15	ENSG00000103326	calpain 15	protein_coding	0.48	1.39474	5	0.014748	0.0122064	0.53	0.00431149
TMEM11	ENSG00000178307	transmembrane protein 11	protein_coding	0.48	1.39474	5.07	0.00662235	0.00123271	0.5	0.00781458
CLCN5	ENSG00000171365	chloride voltage-gated channel 5	protein_coding	0.48	1.39474	3.32	0.0411607	0.0157167	0.4	0.0555328
DCAF12	ENSG00000198876	DDB1 and CUL4 associated factor 12	protein_coding	0.48	1.39474	5.99	0.000993613	0.000161482	0.62	0.000385369
FAM53C	ENSG00000120709	family with sequence similarity 53 member C	protein_coding	0.48	1.39474	6.09	0.000233842	0.000114847	0.67	6.29447e-05
MDH2	ENSG00000146701	malate dehydrogenase 2	protein_coding	0.48	1.39474	7.76	0.000328626	0.00149145	0.66	7.44181e-05
RPL7L1	ENSG00000146223	ribosomal protein L7 like 1	protein_coding	0.49	1.40444	7.11	6.05456e-05	0.000114847	0.71	8.43322e-06
SEH1L	ENSG00000085415	SEH1 like nucleoporin	protein_coding	0.49	1.40444	5.15	0.000120937	0.000202437	0.72	5.66486e-06
EXOC3-AS1	ENSG00000221990	EXOC3 antisense RNA 1	lncRNA	0.49	1.40444	2.78	0.0315339	0.00466188	0.44	0.0286638
E2F3	ENSG00000112242	E2F transcription factor 3	protein_coding	0.5	1.41421	3.58	0.0074556	0.00178359	0.53	0.00431149
EPN1	ENSG00000063245	epsin 1	protein_coding	0.5	1.41421	7.55	0.0163501	0.0222625	0.46	0.0192099
SELENON	ENSG00000162430	selenoprotein N	protein_coding	0.5	1.41421	8.1	0.000342392	0.000684911	0.69	2.63586e-05
DDOST	ENSG00000244038	dolichyl-diphosphooligosaccharide--protein glycosyltransferase non-catalytic subunit	protein_coding	0.5	1.41421	8.15	0.00393655	0.0176367	0.63	0.000251428
MOV10	ENSG00000155363	Mov10 RISC complex RNA helicase	protein_coding	0.5	1.41421	6.04	0.000497959	0.00123271	0.69	2.63586e-05
RAB40C	ENSG00000197562	RAB40C, member RAS oncogene family	protein_coding	0.5	1.41421	5.31	0.00252767	0.00210559	0.54	0.00316034
NFIX	ENSG00000008441	nuclear factor I X	protein_coding	0.51	1.42405	8.74	0.0171992	0.00623949	0.49	0.00942878
SPATA2	ENSG00000158480	spermatogenesis associated 2	protein_coding	0.51	1.42405	4.85	0.000914021	0.00210559	0.6	0.000658982
SAR1B	ENSG00000152700	secretion associated Ras related GTPase 1B	protein_coding	0.51	1.42405	7.11	0.0173416	0.0176367	0.36	0.104509
LARP1	ENSG00000155506	La ribonucleoprotein 1, translational regulator	protein_coding	0.52	1.43396	7.7	0.00123509	0.000551112	0.61	0.000440939
SOX12	ENSG00000177732	SRY-box transcription factor 12	protein_coding	0.52	1.43396	5.08	0.0102191	0.0122064	0.49	0.0103209
SNX8	ENSG00000106266	sorting nexin 8	protein_coding	0.52	1.43396	4.4	0.000428596	0.000114847	0.68	3.76404e-05
RERE	ENSG00000142599	arginine-glutamic acid dipeptide repeats	protein_coding	0.52	1.43396	8.52	0.00143963	0.00210559	0.61	0.000506304
SLC35B2	ENSG00000157593	solute carrier family 35 member B2	protein_coding	0.52	1.43396	6.21	8.79015e-05	0.000161482	0.7	1.82219e-05
CANX	ENSG00000127022	calnexin	protein_coding	0.52	1.43396	10.05	0.00194185	0.000829385	0.56	0.00178661
ZDHHC12	ENSG00000160446	zinc finger DHHC-type palmitoyltransferase 12	protein_coding	0.52	1.43396	5.45	0.0338043	0.0176367	0.36	0.104509
EMC10	ENSG00000161671	ER membrane protein complex subunit 10	protein_coding	0.52	1.43396	7.72	0.00201456	0.00342614	0.56	0.00201302
NOLC1	ENSG00000166197	nucleolar and coiled-body phosphoprotein 1	protein_coding	0.53	1.44393	6.95	0.000580516	0.000439058	0.65	0.000139193
POLR2H	ENSG00000163882	RNA polymerase II, I and III subunit H	protein_coding	0.53	1.44393	5.11	0.00250095	0.00466188	0.57	0.00158563
SH3BP4	ENSG00000130147	SH3 domain binding protein 4	protein_coding	0.53	1.44393	7.46	0.00162259	0.00828562	0.67	5.31846e-05
ADCK1	ENSG00000063761	aarF domain containing kinase 1	protein_coding	0.53	1.44393	3.65	0.00311086	0.00101768	0.53	0.00431149
UBE2O	ENSG00000175931	ubiquitin conjugating enzyme E2 O	protein_coding	0.53	1.44393	5.67	5.59814e-05	0.000161482	0.82	2.96445e-08
CERS2	ENSG00000143418	ceramide synthase 2	protein_coding	0.54	1.45397	7.27	0.000310762	0.000684911	0.68	3.76404e-05
DPM2	ENSG00000136908	dolichyl-phosphate mannosyltransferase subunit 2, regulatory	protein_coding	0.54	1.45397	5.72	0.011219	0.00210559	0.44	0.0264368
DPP3	ENSG00000254986	dipeptidyl peptidase 3	protein_coding	0.54	1.45397	5.49	0.000205002	0.000829385	0.65	0.000102275
ADIPOR1	ENSG00000159346	adiponectin receptor 1	protein_coding	0.54	1.45397	7.14	6.27377e-05	0.000114847	0.7	1.82219e-05
CNOT6	ENSG00000113300	CCR4-NOT transcription complex subunit 6	protein_coding	0.55	1.46409	5.79	0.00061	0.000275416	0.63	0.000251428
TRIM3	ENSG00000110171	tripartite motif containing 3	protein_coding	0.55	1.46409	4.52	0.000285246	0.000161482	0.73	3.7856e-06
DOLK	ENSG00000175283	dolichol kinase	protein_coding	0.55	1.46409	5	0.000789503	0.000439058	0.6	0.000578472
FAM222B	ENSG00000173065	family with sequence similarity 222 member B	protein_coding	0.55	1.46409	5.29	0.000915273	0.000439058	0.66	8.72349e-05
GNL2	ENSG00000134697	G protein nucleolar 2	protein_coding	0.55	1.46409	5.69	0.000273837	0.000114847	0.65	0.000102275
ARID5B	ENSG00000150347	AT-rich interaction domain 5B	protein_coding	0.56	1.47427	7.22	0.0484244	0.00828562	0.43	0.0335038
NME2	ENSG00000243678	NME/NM23 nucleoside diphosphate kinase 2	protein_coding	0.56	1.47427	5.71	0.000757991	0.00398843	0.61	0.000506304
WBP11	ENSG00000084463	WW domain binding protein 11	protein_coding	0.56	1.47427	6.98	0.0021643	0.00292962	0.51	0.00642892
POLR3E	ENSG00000058600	RNA polymerase III subunit E	protein_coding	0.56	1.47427	5.78	5.83113e-05	0.000114847	0.71	1.02659e-05
AEN	ENSG00000181026	apoptosis enhancing nuclease	protein_coding	0.56	1.47427	4.92	0.0124518	0.00466188	0.37	0.0817378
ZNF664	ENSG00000179195	zinc finger protein 664	protein_coding	0.56	1.47427	7.57	0.000134953	0.000346309	0.67	6.29447e-05
ARHGDIA	ENSG00000141522	Rho GDP dissociation inhibitor alpha	protein_coding	0.57	1.48452	7.96	5.76542e-05	0.000114847	0.71	1.24515e-05
NCEH1	ENSG00000144959	neutral cholesterol ester hydrolase 1	protein_coding	0.57	1.48452	4.77	0.0256848	0.0122064	0.34	0.130818
SPATS2	ENSG00000123352	spermatogenesis associated serine rich 2	protein_coding	0.57	1.48452	4.99	0.000802909	0.00249166	0.56	0.00178661
SLC52A2	ENSG00000185803	solute carrier family 52 member 2	protein_coding	0.57	1.48452	5.49	0.0242777	0.0343796	0.53	0.00389508
SETD7	ENSG00000145391	SET domain containing 7, histone lysine methyltransferase	protein_coding	0.58	1.49485	7.79	0.0167063	0.000275416	0.49	0.0113268
MARK2	ENSG00000072518	microtubule affinity regulating kinase 2	protein_coding	0.58	1.49485	6.61	2.1491e-05	0.000346309	0.74	2.49306e-06
MYDGF	ENSG00000074842	myeloid derived growth factor	protein_coding	0.58	1.49485	7.02	0.00438441	0.0157167	0.55	0.00253493
KIF3B	ENSG00000101350	kinesin family member 3B	protein_coding	0.59	1.50525	6.49	0.000494406	0.000161482	0.62	0.000336341
WDR3	ENSG00000065183	WD repeat domain 3	protein_coding	0.59	1.50525	5.17	0.000600134	0.000439058	0.59	0.000853427
ABHD12	ENSG00000100997	abhydrolase domain containing 12, lysophospholipase	protein_coding	0.59	1.50525	6.66	0.023864	0.0222625	0.33	0.143362
FBXO46	ENSG00000177051	F-box protein 46	protein_coding	0.59	1.50525	4.64	0.000616645	0.000114847	0.64	0.000188327
HNRNPF	ENSG00000169813	heterogeneous nuclear ribonucleoprotein F	protein_coding	0.59	1.50525	7.93	2.15427e-05	0.000161482	0.72	5.66486e-06
AP2S1	ENSG00000042753	adaptor related protein complex 2 subunit sigma 1	protein_coding	0.6	1.51572	6.37	0.0124518	0.0122064	0.43	0.0310185
NOL6	ENSG00000165271	nucleolar protein 6	protein_coding	0.6	1.51572	5.91	2.00913e-05	0.000346309	0.76	1.05578e-06
ORAI3	ENSG00000175938	ORAI calcium release-activated calcium modulator 3	protein_coding	0.6	1.51572	4.97	0.0116666	0.00943724	0.39	0.0636183
RPUSD1	ENSG00000007376	RNA pseudouridine synthase domain containing 1	protein_coding	0.6	1.51572	4.4	0.00711807	0.00342614	0.49	0.0103209
SEC22C	ENSG00000093183	SEC22 homolog C, vesicle trafficking protein	protein_coding	0.61	1.52626	6.86	0.000860589	0.00342614	0.62	0.000385369
DOT1L	ENSG00000104885	DOT1 like histone lysine methyltransferase	protein_coding	0.61	1.52626	4.55	0.00284473	0.000829385	0.6	0.000578472
AFDN	ENSG00000130396	afadin, adherens junction formation factor	protein_coding	0.61	1.52626	7.65	0.0261093	0.0343796	0.36	0.0927924
REPIN1	ENSG00000214022	replication initiator 1	protein_coding	0.62	1.53688	6.97	5.28299e-05	0.000684911	0.68	3.16136e-05
ANKRD52	ENSG00000139645	ankyrin repeat domain 52	protein_coding	0.63	1.54756	6.14	0.0029141	0.000439058	0.54	0.00316034
PRRC2A	ENSG00000204469	proline rich coiled-coil 2A	protein_coding	0.63	1.54756	8.86	5.17989e-05	0.000161482	0.76	8.33232e-07
EIF4G1	ENSG00000114867	eukaryotic translation initiation factor 4 gamma 1	protein_coding	0.63	1.54756	8.94	0.00032098	0.000114847	0.67	6.29447e-05
PKN1	ENSG00000123143	protein kinase N1	protein_coding	0.63	1.54756	7.2	0.000368292	0.000439058	0.62	0.000385369
TLE3	ENSG00000140332	TLE family member 3, transcriptional corepressor	protein_coding	0.63	1.54756	7.23	0.000154092	0.000439058	0.69	2.63586e-05
TRUB2	ENSG00000167112	TruB pseudouridine synthase family member 2	protein_coding	0.63	1.54756	5.62	9.11695e-06	0.000439058	0.76	1.05578e-06
TMED9	ENSG00000184840	transmembrane p24 trafficking protein 9	protein_coding	0.63	1.54756	8.01	0.000272643	0.00292962	0.65	0.000119183
STK35	ENSG00000125834	serine/threonine kinase 35	protein_coding	0.63	1.54756	5.49	0.000130936	0.000114847	0.73	3.7856e-06
CCT3	ENSG00000163468	chaperonin containing TCP1 subunit 3	protein_coding	0.64	1.55833	8.11	3.50498e-06	0.000114847	0.78	2.50802e-07
RFFL	ENSG00000092871	ring finger and FYVE like domain containing E3 ubiquitin protein ligase	protein_coding	0.65	1.56917	5.41	0.000205595	0.000346309	0.63	0.000217888
ADCY6	ENSG00000174233	adenylate cyclase 6	protein_coding	0.65	1.56917	6.29	0.00371308	0.00178359	0.54	0.00316034
ATP6AP1	ENSG00000071553	ATPase H+ transporting accessory protein 1	protein_coding	0.65	1.56917	8.29	0.000119781	0.000161482	0.66	7.44181e-05
NFKB2	ENSG00000077150	nuclear factor kappa B subunit 2	protein_coding	0.66	1.58008	5.73	0.00136486	0.00149145	0.59	0.000853427
SLC30A7	ENSG00000162695	solute carrier family 30 member 7	protein_coding	0.66	1.58008	5.66	9.94777e-05	0.000684911	0.68	4.49206e-05
TIMM13	ENSG00000099800	translocase of inner mitochondrial membrane 13	protein_coding	0.66	1.58008	5.9	0.000828833	0.000684911	0.59	0.000853427
LCOR	ENSG00000196233	ligand dependent nuclear receptor corepressor	protein_coding	0.66	1.58008	4.96	0.000920854	0.00466188	0.58	0.00110189
MGAT4B	ENSG00000161013	alpha-1,3-mannosyl-glycoprotein 4-beta-N-acetylglucosaminyltransferase B	protein_coding	0.66	1.58008	6.08	5.9078e-07	0.000114847	0.83	1.6778e-08
TOR2A	ENSG00000160404	torsin family 2 member A	protein_coding	0.66	1.58008	3.99	0.000402251	0.000275416	0.65	0.000119183
PPIB	ENSG00000166794	peptidylprolyl isomerase B	protein_coding	0.67	1.59107	8.34	0.000872036	0.00623949	0.61	0.000440939
RPS6KA4	ENSG00000162302	ribosomal protein S6 kinase A4	protein_coding	0.67	1.59107	5.2	6.16683e-05	0.000551112	0.68	3.16136e-05
DIAPH1	ENSG00000131504	diaphanous related formin 1	protein_coding	0.67	1.59107	6.73	0.000487406	0.00466188	0.65	0.000139193
HIVEP1	ENSG00000095951	HIVEP zinc finger 1	protein_coding	0.68	1.60214	5.52	0.00127715	0.00342614	0.57	0.00158563
DIPK1B	ENSG00000165716	divergent protein kinase domain 1B	protein_coding	0.68	1.60214	3.52	0.0103837	0.00828562	0.44	0.0286638
PABPC1	ENSG00000070756	poly(A) binding protein cytoplasmic 1	protein_coding	0.69	1.61328	10.48	0.000119013	0.00149145	0.67	5.31846e-05
STARD10	ENSG00000214530	StAR related lipid transfer domain containing 10	protein_coding	0.69	1.61328	7.13	0.018276	0.0310182	0.39	0.0680532
ATF5	ENSG00000169136	activating transcription factor 5	protein_coding	0.69	1.61328	5.81	0.000380011	0.000346309	0.58	0.00125093
MAP3K9	ENSG00000006432	mitogen-activated protein kinase kinase kinase 9	protein_coding	0.7	1.6245	3.53	0.00975413	0.00292962	0.51	0.00642892
DDX21	ENSG00000165732	DExD-box helicase 21	protein_coding	0.7	1.6245	6.38	0.00103328	0.000114847	0.57	0.00158563
TRAF7	ENSG00000131653	TNF receptor associated factor 7	protein_coding	0.7	1.6245	6.3	3.51352e-07	0.000114847	0.81	3.89567e-08
KIF5C	ENSG00000168280	kinesin family member 5C	protein_coding	0.71	1.6358	7.47	0.0441585	0.0381054	0.44	0.0286638
OSBP2	ENSG00000184792	oxysterol binding protein 2	protein_coding	0.71	1.6358	3.49	1.4968e-05	0.000114847	0.79	1.56698e-07
GRAMD1A	ENSG00000089351	GRAM domain containing 1A	protein_coding	0.71	1.6358	6.44	7.49197e-05	0.00342614	0.68	4.49206e-05
DEGS1	ENSG00000143753	delta 4-desaturase, sphingolipid 1	protein_coding	0.72	1.64718	7.47	0.00442554	0.0138685	0.48	0.0135942
EPB41	ENSG00000159023	erythrocyte membrane protein band 4,1	protein_coding	0.73	1.65864	6.18	0.000165027	0.000114847	0.6	0.000658982
ALG3	ENSG00000214160	ALG3 alpha-1,3- mannosyltransferase	protein_coding	0.73	1.65864	5.56	0.000770272	0.00149145	0.58	0.00110189
GOLPH3	ENSG00000113384	golgi phosphoprotein 3	protein_coding	0.73	1.65864	7.9	1.06183e-05	0.000275416	0.71	1.24515e-05
ZBTB37	ENSG00000185278	zinc finger and BTB domain containing 37	protein_coding	0.73	1.65864	4.45	0.00316713	0.00466188	0.48	0.0124192
TBC1D16	ENSG00000167291	TBC1 domain family member 16	protein_coding	0.73	1.65864	7.19	0.0159153	0.00720585	0.49	0.0113268
SLC35E1	ENSG00000127526	solute carrier family 35 member E1	protein_coding	0.73	1.65864	7.28	8.30167e-05	0.000114847	0.68	4.49206e-05
FKBP4	ENSG00000004478	FKBP prolyl isomerase 4	protein_coding	0.74	1.67018	8.1	5.87425e-05	0.000202437	0.69	2.63586e-05
PLXNA3	ENSG00000130827	plexin A3	protein_coding	0.74	1.67018	5.99	8.7616e-05	0.000114847	0.68	3.16136e-05
YRDC	ENSG00000196449	yrdC N6-threonylcarbamoyltransferase domain containing	protein_coding	0.76	1.69349	4.27	3.01608e-05	0.000114847	0.7	1.82219e-05
TRAF4	ENSG00000076604	TNF receptor associated factor 4	protein_coding	0.78	1.71713	6.15	0.0011738	0.00178359	0.66	7.44181e-05
MAP3K21	ENSG00000143674	mitogen-activated protein kinase kinase kinase 21	protein_coding	0.78	1.71713	2.93	0.00866493	0.00828562	0.49	0.00942878
SLC16A1	ENSG00000155380	solute carrier family 16 member 1	protein_coding	0.8	1.7411	6.01	0.0300164	0.0107531	0.44	0.0286638
ACSL3	ENSG00000123983	acyl-CoA synthetase long chain family member 3	protein_coding	0.8	1.7411	8.2	0.00189818	0.000551112	0.52	0.00477303
FAAH	ENSG00000117480	fatty acid amide hydrolase	protein_coding	0.81	1.75321	7.11	0.0204301	0.00537948	0.37	0.0817378
IMPDH1	ENSG00000106348	inosine monophosphate dehydrogenase 1	protein_coding	0.81	1.75321	6.33	4.58429e-05	0.000684911	0.7	1.50087e-05
HASPIN	ENSG00000177602	histone H3 associated protein kinase	protein_coding	0.82	1.76541	-1.63	0.0309941	0.00249166	0.44	0.0264368
NPTXR	ENSG00000221890	neuronal pentraxin receptor	protein_coding	0.83	1.77769	6.37	0.000307307	0.000829385	0.59	0.000751544
H2BC21	ENSG00000184678	H2B clustered histone 21	protein_coding	0.83	1.77769	7.44	0.0228287	0.00828562	0.54	0.00352187
B4GALT3	ENSG00000158850	beta-1,4-galactosyltransferase 3	protein_coding	0.83	1.77769	5.75	8.88415e-07	0.000161482	0.79	1.56698e-07
METTL26	ENSG00000130731	methyltransferase like 26	protein_coding	0.84	1.79005	5.6	0.0328372	0.0107531	0.31	0.176394
CHPF	ENSG00000123989	chondroitin polymerizing factor	protein_coding	0.85	1.8025	7.8	0.000174121	0.00398843	0.62	0.000336341
LMO7	ENSG00000136153	LIM domain 7	protein_coding	0.86	1.81504	6.63	0.00262857	0.00720585	0.5	0.00859453
ATP13A2	ENSG00000159363	ATPase cation transporting 13A2	protein_coding	0.86	1.81504	6.09	2.32593e-05	0.000346309	0.69	2.19814e-05
RPS2	ENSG00000140988	ribosomal protein S2	protein_coding	0.87	1.82766	9.96	0.0013789	0.000684911	0.56	0.00178661
ELK4	ENSG00000158711	ETS transcription factor ELK4	protein_coding	0.88	1.84038	7.34	0.00880247	0.046735	0.42	0.0361563
PRMT6	ENSG00000198890	protein arginine methyltransferase 6	protein_coding	0.88	1.84038	5.12	1.38929e-05	0.000439058	0.71	1.24515e-05
C16orf70	ENSG00000125149	chromosome 16 open reading frame 70	protein_coding	0.89	1.85318	5.24	1.18486e-05	0.000161482	0.71	1.02659e-05
CALR	ENSG00000179218	calreticulin	protein_coding	0.9	1.86607	10.28	1.5521e-07	0.000114847	0.83	1.23181e-08
NSF	ENSG00000073969	N-ethylmaleimide sensitive factor, vesicle fusing ATPase	protein_coding	0.9	1.86607	5.99	1.51172e-06	0.000114847	0.73	3.7856e-06
EEF2	ENSG00000167658	eukaryotic translation elongation factor 2	protein_coding	0.92	1.89212	12.01	2.78153e-08	0.000114847	0.84	9.48803e-09
GTF3C1	ENSG00000077235	general transcription factor IIIC subunit 1	protein_coding	0.96	1.94531	8.44	4.21067e-06	0.000114847	0.75	1.31492e-06
PAICS	ENSG00000128050	phosphoribosylaminoimidazole carboxylase and phosphoribosylaminoimidazolesuccinocarboxamide synthase	protein_coding	0.96	1.94531	6.98	5.59254e-09	0.000161482	0.81	5.21578e-08
PTTG1	ENSG00000164611	PTTG1 regulator of sister chromatid separation, securin	protein_coding	0.97	1.95884	1.5	0.00651213	0.00720585	0.52	0.00584249
PNKD	ENSG00000127838	PNKD metallo-beta-lactamase domain containing	protein_coding	0.97	1.95884	7.87	3.26447e-05	0.000684911	0.7	1.82219e-05
DIP2A	ENSG00000160305	disco interacting protein 2 homolog A	protein_coding	1	2	6.23	4.49848e-06	0.000161482	0.71	8.43322e-06
TRIB3	ENSG00000101255	tribbles pseudokinase 3	protein_coding	1	2	4.86	2.08391e-05	0.000275416	0.69	2.19814e-05
TET3	ENSG00000187605	tet methylcytosine dioxygenase 3	protein_coding	1	2	4.98	9.74347e-05	0.000114847	0.66	7.44181e-05
MYC	ENSG00000136997	MYC proto-oncogene, bHLH transcription factor	protein_coding	1.01	2.01391	6.66	0.0201793	0.0198496	0.61	0.000440939
HYOU1	ENSG00000149428	hypoxia up-regulated 1	protein_coding	1.01	2.01391	8.28	1.84427e-05	0.000114847	0.68	3.16136e-05
TRAM2	ENSG00000065308	translocation associated membrane protein 2	protein_coding	1.02	2.02792	5.14	0.000119768	0.000114847	0.67	6.29447e-05
FOXRED2	ENSG00000100350	FAD dependent oxidoreductase domain containing 2	protein_coding	1.03	2.04202	5.76	1.89365e-07	0.000114847	0.83	1.6778e-08
CBX2	ENSG00000173894	chromobox 2	protein_coding	1.05	2.07053	1.33	0.00373033	0.0198496	0.55	0.00283429
H2BC18	ENSG00000203814	H2B clustered histone 18	protein_coding	1.07	2.09943	2.08	0.0092932	0.00466188	0.51	0.00642892
SRM	ENSG00000116649	spermidine synthase	protein_coding	1.09	2.12874	6.07	2.03556e-05	0.000161482	0.7	1.50087e-05
FAM83H	ENSG00000180921	family with sequence similarity 83 member H	protein_coding	1.09	2.12874	6.39	6.62069e-05	0.000551112	0.69	2.63586e-05
MFSD12	ENSG00000161091	major facilitator superfamily domain containing 12	protein_coding	1.09	2.12874	5.68	8.88415e-07	0.000275416	0.81	5.21578e-08
SYNGR2	ENSG00000108639	synaptogyrin 2	protein_coding	1.1	2.14355	8.81	8.12684e-07	0.000114847	0.81	3.89567e-08
SAMD10	ENSG00000130590	sterile alpha motif domain containing 10	protein_coding	1.1	2.14355	3.75	4.58269e-06	0.000202437	0.75	1.31492e-06
MAZ	ENSG00000103495	MYC associated zinc finger protein	protein_coding	1.11	2.15846	6.55	5.87124e-07	0.000161482	0.75	1.31492e-06
TBC1D4	ENSG00000136111	TBC1 domain family member 4	protein_coding	1.12	2.17347	6.5	0.000804303	0.000684911	0.62	0.000385369
P4HB	ENSG00000185624	prolyl 4-hydroxylase subunit beta	protein_coding	1.12	2.17347	10.81	1.24904e-08	0.000114847	0.87	1.68462e-09
PKMYT1	ENSG00000127564	protein kinase, membrane associated tyrosine/threonine 1	protein_coding	1.13	2.18859	1.03	0.0020692	0.00398843	0.65	0.000119183
ARHGAP32	ENSG00000134909	Rho GTPase activating protein 32	protein_coding	1.14	2.20381	6.02	2.4845e-05	0.000275416	0.72	6.9242e-06
B4GALNT4	ENSG00000182272	beta-1,4-N-acetyl-galactosaminyltransferase 4	protein_coding	1.14	2.20381	3.42	0.00303593	0.00623949	0.47	0.0148392
MAPK8IP2	ENSG00000008735	mitogen-activated protein kinase 8 interacting protein 2	protein_coding	1.14	2.20381	3.62	0.000841112	0.00149145	0.65	0.000139193
LYPLA1	ENSG00000120992	lysophospholipase 1	protein_coding	1.15	2.21914	6.62	2.79046e-05	0.000114847	0.74	2.49306e-06
TTLL12	ENSG00000100304	tubulin tyrosine ligase like 12	protein_coding	1.18	2.26577	6.87	1.50591e-07	0.000114847	0.78	3.19515e-07
HIPK2	ENSG00000064393	homeodomain interacting protein kinase 2	protein_coding	1.22	2.32947	7.84	1.20661e-05	0.000161482	0.68	3.76404e-05
CBX8	ENSG00000141570	chromobox 8	protein_coding	1.27	2.41162	3.21	8.37997e-07	0.000275416	0.77	5.28648e-07
NEDD4L	ENSG00000049759	NEDD4 like E3 ubiquitin protein ligase	protein_coding	1.32	2.49666	8.62	6.58957e-06	0.000439058	0.67	5.31846e-05
H2BC12	ENSG00000197903	H2B clustered histone 12	protein_coding	1.32	2.49666	5.31	2.05168e-06	0.000202437	0.73	4.62163e-06
BICDL1	ENSG00000135127	BICD family like cargo adaptor 1	protein_coding	1.36	2.56685	3.87	4.50585e-05	0.000346309	0.74	3.09184e-06
NUP210	ENSG00000132182	nucleoporin 210	protein_coding	1.44	2.71321	5.89	1.24904e-08	0.000114847	0.87	1.68462e-09
C19orf48	ENSG00000167747	chromosome 19 open reading frame 48	transcribed_unitary_pseudogene	1.45	2.73208	7.74	0.000247088	0.000114847	0.71	1.02659e-05
ARFGEF3	ENSG00000112379	ARFGEF family member 3	protein_coding	1.53	2.88786	8.09	8.4311e-06	0.000114847	0.76	8.33232e-07
FOXM1	ENSG00000111206	forkhead box M1	protein_coding	1.54	2.90795	2.01	4.9208e-06	0.000114847	0.77	5.28648e-07
MATR3	ENSG00000280987	matrin 3 [Source:NCBI gene (formerly Entrezgene)	protein_coding	1.55	2.92817	0.87	3.6278e-07	0.000161482	0.84	9.48803e-09
H1-2	ENSG00000187837	H1,2 linker histone, cluster member	protein_coding	1.56	2.94854	7.28	0.00027564	0.00720585	0.52	0.00527351
GPRIN1	ENSG00000169258	G protein regulated inducer of neurite outgrowth 1	protein_coding	1.57	2.96905	0.82	7.08483e-06	0.000114847	0.84	6.92854e-09
CELSR3	ENSG00000008300	cadherin EGF LAG seven-pass G-type receptor 3	protein_coding	1.62	3.07375	1.84	7.16061e-05	0.000829385	0.59	0.000853427
ESRP2	ENSG00000103067	epithelial splicing regulatory protein 2	protein_coding	1.63	3.09513	6.17	1.11551e-08	0.000114847	0.85	4.2827e-09
KIF18B	ENSG00000186185	kinesin family member 18B	protein_coding	1.63	3.09513	-0.32	0.000395678	0.00178359	0.59	0.000751544
SBK1	ENSG00000188322	SH3 domain binding kinase 1	protein_coding	1.66	3.16017	4.19	9.46232e-09	0.000114847	0.86	1.93558e-09
NOL4	ENSG00000101746	nucleolar protein 4	protein_coding	1.69	3.22657	1.29	0.0237551	0.0381054	0.38	0.0768595
RTN4RL2	ENSG00000186907	reticulon 4 receptor like 2	protein_coding	1.71	3.27161	1.61	4.56615e-06	0.000161482	0.78	2.50802e-07
IQGAP3	ENSG00000183856	IQ motif containing GTPase activating protein 3	protein_coding	1.72	3.29436	1.21	6.28997e-05	0.000275416	0.68	4.49206e-05
WDR93	ENSG00000140527	WD repeat domain 93	protein_coding	1.75	3.36359	2.06	4.59181e-05	0.00101768	0.58	0.000970096
MYBL2	ENSG00000101057	MYB proto-oncogene like 2	protein_coding	1.79	3.45815	1.31	9.01585e-06	0.000114847	0.79	1.56698e-07
SAMD5	ENSG00000203727	sterile alpha motif domain containing 5	protein_coding	1.79	3.45815	4.18	1.33347e-05	0.00292962	0.68	3.16136e-05
COL12A1	ENSG00000111799	collagen type XII alpha 1 chain	protein_coding	1.83	3.55537	7.74	0.00324961	0.0310182	0.28	0.249895
H1-4	ENSG00000168298	H1,4 linker histone, cluster member	protein_coding	1.98	3.94493	0.19	0.000145122	0.00249166	0.59	0.000853427
RRM2	ENSG00000171848	ribonucleotide reductase regulatory subunit M2	protein_coding	1.99	3.97237	2.22	1.24047e-06	0.000161482	0.74	2.49306e-06
GJB1	ENSG00000169562	gap junction protein beta 1	protein_coding	2.01	4.02782	6.04	1.4339e-07	0.000202437	0.78	4.08922e-07
TRIB1	ENSG00000173334	tribbles pseudokinase 1	protein_coding	2.08	4.22807	8.05	0.000420401	0.000114847	0.71	8.43322e-06
PODXL2	ENSG00000114631	podocalyxin like 2	protein_coding	2.12	4.34694	6.67	1.024e-06	0.000114847	0.8	9.17524e-08
FASN	ENSG00000169710	fatty acid synthase	protein_coding	2.13	4.37717	10.23	8.46085e-07	0.000114847	0.78	4.08922e-07
MON1B	ENSG00000103111	MON1 homolog B, secretory trafficking associated	protein_coding	2.92	7.56846	8.45	2.24968e-06	0.000114847	0.74	3.09184e-06
SHISA8	ENSG00000234965	shisa family member 8	protein_coding	3.34	10.1261	-0.66	8.63341e-05	0.000275416	0.54	0.00316034

## Sheet: miR570_3p
Gene name	Gene id	Description	Biotype	LogFC	LogCPM	QLF_FDR	MW_FDR	Spearman_correlation_coef	Spearman_correlation_FDR
ATP6V1G3	ENSG00000151418	ATPase H+ transporting V1 subunit G3	protein_coding	-3.47	-1.6	0.000307836	0.0019064	-0.68	3.41785e-05
SRRM4	ENSG00000139767	serine/arginine repetitive matrix 4	protein_coding	-1.96	-1.57	0.000496149	0.00292962	-0.68	3.16136e-05
SVOP	ENSG00000166111	SV2 related protein	protein_coding	-1.87	-2.69	0.000829576	0.000684911	-0.7	1.47492e-05
SAMD12	ENSG00000177570	sterile alpha motif domain containing 12	protein_coding	-1.86	4.21	4.73942e-05	0.000161482	-0.73	3.7856e-06
IGDCC4	ENSG00000103742	immunoglobulin superfamily DCC subclass member 4	protein_coding	-1.82	1.07	0.00526634	0.00623949	-0.56	0.00178661
CAV2	ENSG00000105971	caveolin 2	protein_coding	-1.59	5.36	3.23364e-07	0.000202437	-0.78	3.19515e-07
SMTN	ENSG00000183963	smoothelin	protein_coding	-1.5	8.13	2.33017e-05	0.00101768	-0.72	5.66486e-06
ATP1B1	ENSG00000143153	ATPase Na+/K+ transporting subunit beta 1	protein_coding	-1.47	6.66	1.05772e-05	0.000275416	-0.77	5.28648e-07
SGK1	ENSG00000118515	serum/glucocorticoid regulated kinase 1	protein_coding	-1.39	7.1	0.0144495	0.0107531	-0.39	0.0636183
WSCD2	ENSG00000075035	WSC domain containing 2	protein_coding	-1.22	3.5	0.0116379	0.0176367	-0.56	0.00201302
GDF6	ENSG00000156466	growth differentiation factor 6	protein_coding	-1.17	-0.09	0.0229795	0.0278207	-0.37	0.0817378
PDE5A	ENSG00000138735	phosphodiesterase 5A	protein_coding	-1.09	7.08	0.0245234	0.00537948	-0.55	0.00253493
KCNB1	ENSG00000158445	potassium voltage-gated channel subfamily B member 1	protein_coding	-1.04	3.79	0.0160398	0.0421612	-0.48	0.0135942
GRK5	ENSG00000198873	G protein-coupled receptor kinase 5	protein_coding	-1.04	3.95	0.000397985	0.00123271	-0.59	0.000751544
TMEM154	ENSG00000170006	transmembrane protein 154	protein_coding	-1	2.46	0.00507849	0.000551112	-0.58	0.00110189
IFIT3	ENSG00000119917	interferon induced protein with tetratricopeptide repeats 3	protein_coding	-0.94	3.73	0.00278337	0.000161482	-0.57	0.00140874
TEAD1	ENSG00000187079	TEA domain transcription factor 1	protein_coding	-0.92	6.43	0.00180168	0.00149145	-0.55	0.00253493
ZFAND5	ENSG00000107372	zinc finger AN1-type containing 5	protein_coding	-0.92	7.64	1.50575e-06	0.000114847	-0.8	1.17963e-07
DENND2C	ENSG00000175984	DENN domain containing 2C	protein_coding	-0.85	2.42	0.00106703	0.00623949	-0.58	0.00125093
TMEM47	ENSG00000147027	transmembrane protein 47	protein_coding	-0.78	6.24	0.00321687	0.00537948	-0.55	0.00283429
CPNE8	ENSG00000139117	copine 8	protein_coding	-0.78	2.59	0.00368703	0.00178359	-0.55	0.00225163
TGFBR2	ENSG00000163513	transforming growth factor beta receptor 2	protein_coding	-0.68	6.74	0.0103341	0.00537948	-0.49	0.0113268
SLC43A3	ENSG00000134802	solute carrier family 43 member 3	protein_coding	-0.65	2.99	0.0182263	0.0343796	-0.47	0.0148392
CD274	ENSG00000120217	CD274 molecule	protein_coding	-0.64	1.41	0.039065	0.000829385	-0.51	0.00708093
P2RX7	ENSG00000089041	purinergic receptor P2X 7	protein_coding	-0.63	2.31	0.0283557	0.00720585	-0.41	0.044826
CRTAP	ENSG00000170275	cartilage associated protein	protein_coding	-0.58	7.89	0.000358135	0.000439058	-0.63	0.000251428
PPTC7	ENSG00000196850	protein phosphatase targeting COQ7	protein_coding	-0.49	5.13	0.00315824	0.000684911	-0.64	0.000188327
CDKN2AIP	ENSG00000168564	CDKN2A interacting protein	protein_coding	-0.48	4.71	0.00300577	0.00210559	-0.6	0.000658982
CLUAP1	ENSG00000103351	clusterin associated protein 1	protein_coding	-0.43	4.89	0.00163886	0.000202437	-0.62	0.000290506
MORF4L1	ENSG00000185787	mortality factor 4 like 1	protein_coding	-0.42	7.64	0.00446342	0.00466188	-0.57	0.00158563
CCDC115	ENSG00000136710	coiled-coil domain containing 115	protein_coding	-0.39	5.64	0.0188546	0.00210559	-0.52	0.00527351
ARPC2	ENSG00000163466	actin related protein 2/3 complex subunit 2	protein_coding	-0.38	7.35	0.00507682	0.00720585	-0.56	0.00201302
NASP	ENSG00000132780	nuclear autoantigenic sperm protein	protein_coding	-0.37	6	0.0368664	0.00537948	-0.44	0.0264368
CELF1	ENSG00000149187	CUGBP Elav-like family member 1	protein_coding	0.28	6.81	0.0354342	0.0122064	0.52	0.00584249
PSME3	ENSG00000131467	proteasome activator subunit 3	protein_coding	0.32	6.54	0.00961924	0.000275416	0.61	0.000440939
PPIA	ENSG00000196262	peptidylprolyl isomerase A	protein_coding	0.39	7.79	0.026507	0.0107531	0.46	0.0176326
STRBP	ENSG00000165209	spermatid perinuclear RNA binding protein	protein_coding	0.39	5.21	0.00594839	0.00249166	0.54	0.00352187
RAD23B	ENSG00000119318	RAD23 homolog B, nucleotide excision repair protein	protein_coding	0.39	7.68	0.00135911	0.00101768	0.66	7.44181e-05
CHSY1	ENSG00000131873	chondroitin sulfate synthase 1	protein_coding	0.4	6.15	0.0123202	0.0138685	0.56	0.00178661
LIMD1	ENSG00000144791	LIM domains containing 1	protein_coding	0.41	5.77	0.0175322	0.00210559	0.48	0.0135942
ARL6IP1	ENSG00000170540	ADP ribosylation factor like GTPase 6 interacting protein 1	protein_coding	0.42	7.4	0.017108	0.00828562	0.45	0.0226107
ABL2	ENSG00000143322	ABL proto-oncogene 2, non-receptor tyrosine kinase	protein_coding	0.44	4.99	0.0112673	0.00292962	0.55	0.00225163
SSR1	ENSG00000124783	signal sequence receptor subunit 1	protein_coding	0.45	7.96	0.0033193	0.000829385	0.55	0.00225163
GPAT4	ENSG00000158669	glycerol-3-phosphate acyltransferase 4	protein_coding	0.47	6.35	0.011457	0.0122064	0.52	0.00584249
CANX	ENSG00000127022	calnexin	protein_coding	0.52	10.05	0.00194185	0.000829385	0.56	0.00178661
GALNT1	ENSG00000141429	polypeptide N-acetylgalactosaminyltransferase 1	protein_coding	0.53	6.58	0.0020022	0.000114847	0.62	0.000385369
BTD	ENSG00000169814	biotinidase	protein_coding	0.57	5.49	0.00203925	0.00398843	0.54	0.00316034
WARS2	ENSG00000116874	tryptophanyl tRNA synthetase 2, mitochondrial	protein_coding	0.58	4.3	0.000756789	0.00101768	0.64	0.000163181
MYDGF	ENSG00000074842	myeloid derived growth factor	protein_coding	0.58	7.02	0.00438441	0.0157167	0.55	0.00253493
HNRNPF	ENSG00000169813	heterogeneous nuclear ribonucleoprotein F	protein_coding	0.59	7.93	2.15427e-05	0.000161482	0.72	5.66486e-06
PTPRJ	ENSG00000149177	protein tyrosine phosphatase receptor type J	protein_coding	0.59	6.19	0.00365215	0.00398843	0.52	0.00477303
SMARCC1	ENSG00000173473	SWI/SNF related, matrix associated, actin dependent regulator of chromatin subfamily c member 1	protein_coding	0.63	7.48	0.000306534	0.000114847	0.64	0.000188327
VPS26B	ENSG00000151502	VPS26, retromer complex component B	protein_coding	0.63	6.73	9.80124e-06	0.000829385	0.75	1.31492e-06
BACH1	ENSG00000156273	BTB domain and CNC homolog 1	protein_coding	0.67	5.93	0.00752909	0.00149145	0.51	0.00708093
ZNF736	ENSG00000234444	zinc finger protein 736	protein_coding	0.73	3.84	0.00271609	0.000829385	0.49	0.00942878
APLP2	ENSG00000084234	amyloid beta precursor like protein 2	protein_coding	0.76	10.35	3.57888e-05	0.000114847	0.73	3.7856e-06
SOAT1	ENSG00000057252	sterol O-acyltransferase 1	protein_coding	0.78	7.31	0.00100838	0.000275416	0.59	0.000853427
ESCO2	ENSG00000171320	establishment of sister chromatid cohesion N-acetyltransferase 2	protein_coding	0.88	-0.42	0.0248523	0.0222625	0.4	0.0555328
CDK6	ENSG00000105810	cyclin dependent kinase 6	protein_coding	0.99	5.66	0.000485622	0.00342614	0.49	0.0113268
DDAH1	ENSG00000153904	dimethylarginine dimethylaminohydrolase 1	protein_coding	1.1	7.35	2.40986e-07	0.000114847	0.78	3.19515e-07
CCNG2	ENSG00000138764	cyclin G2	protein_coding	1.11	7.4	8.94036e-05	0.000439058	0.63	0.000217888
TRIP13	ENSG00000071539	thyroid hormone receptor interactor 13	protein_coding	1.18	1.21	3.35102e-05	0.000202437	0.77	6.59659e-07
PSAT1	ENSG00000135069	phosphoserine aminotransferase 1	protein_coding	1.19	5.09	0.000126188	0.000114847	0.67	5.31846e-05
TOP2A	ENSG00000131747	DNA topoisomerase II alpha	protein_coding	1.41	3.28	0.000232751	0.00101768	0.63	0.000217888
H2BC8	ENSG00000273802	H2B clustered histone 8	protein_coding	1.83	3.49	0.000301728	0.00249166	0.65	0.000102275
F2RL2	ENSG00000164220	coagulation factor II thrombin receptor like 2	protein_coding	1.98	-0.2	0.000212974	0.00249166	0.52	0.00527351
GMNC	ENSG00000205835	geminin coiled-coil domain containing	protein_coding	3.17	1.51	0.000104089	0.00398843	0.6	0.000658982
SLIT1	ENSG00000187122	slit guidance ligand 1	protein_coding	3.37	3.72	5.70767e-06	0.000114847	0.78	3.19515e-07

## Sheet: miR616_3p
Gene name	Gene id	Description	Biotype	LogFC	LogCPM	QLF_FDR	MW_FDR	Spearman_correlation_coef	Spearman_correlation_FDR
MRO	ENSG00000134042	maestro	protein_coding	-3.77	1.62	7.13837e-06	0.000439058	-0.71	8.43322e-06
PCSK9	ENSG00000169174	proprotein convertase subtilisin/kexin type 9	protein_coding	-2.33	-1.65	2.10439e-05	0.00123271	-0.72	6.9242e-06
TOR4A	ENSG00000198113	torsin family 4 member A	protein_coding	-1.54	2.62	0.000142713	0.00123271	-0.55	0.00283429
LGALS3BP	ENSG00000108679	galectin 3 binding protein	protein_coding	-1.42	8.52	2.28091e-06	0.000114847	-0.78	2.50802e-07
MAP1B	ENSG00000131711	microtubule associated protein 1B	protein_coding	-1.41	7.61	0.00200377	0.00398843	-0.58	0.00110189
NT5E	ENSG00000135318	5'-nucleotidase ecto	protein_coding	-1.41	4.41	1.93389e-05	0.000114847	-0.71	1.02659e-05
CPED1	ENSG00000106034	cadherin like and PC-esterase domain containing 1	protein_coding	-1.35	5.83	0.000625394	0.000829385	-0.61	0.000440939
CLIP4	ENSG00000115295	CAP-Gly domain containing linker protein family member 4	protein_coding	-1.29	5	1.94645e-05	0.000202437	-0.71	1.02659e-05
DPYSL3	ENSG00000113657	dihydropyrimidinase like 3	protein_coding	-1.26	8.49	0.00016292	0.00249166	-0.65	0.000139193
SLFN12	ENSG00000172123	schlafen family member 12	protein_coding	-1.18	1.46	0.00268274	0.000346309	-0.6	0.000658982
PFKFB3	ENSG00000170525	6-phosphofructo-2-kinase/fructose-2,6-biphosphatase 3	protein_coding	-1	5.62	0.00340312	0.0107531	-0.48	0.0135942
GPIHBP1	ENSG00000277494	glycosylphosphatidylinositol anchored high density lipoprotein binding protein 1	protein_coding	-0.93	1.11	0.0162567	0.0138685	-0.46	0.0192099
TRIP10	ENSG00000125733	thyroid hormone receptor interactor 10	protein_coding	-0.88	5.64	1.65935e-05	0.000114847	-0.77	6.59659e-07
PCDH18	ENSG00000189184	protocadherin 18	protein_coding	-0.88	4.99	0.0313822	0.0157167	-0.44	0.0264368
MSN	ENSG00000147065	moesin	protein_coding	-0.82	7.72	0.000163962	0.000275416	-0.65	0.000139193
IVNS1ABP	ENSG00000116679	influenza virus NS1A binding protein	protein_coding	-0.73	6.85	0.00719892	0.0421612	-0.39	0.0680532
RORA	ENSG00000069667	RAR related orphan receptor A	protein_coding	-0.69	4.55	0.0139992	0.00623949	-0.4	0.0517625
DPYD	ENSG00000188641	dihydropyrimidine dehydrogenase	protein_coding	-0.67	4.63	0.0176299	0.00943724	-0.42	0.0361563
ACTB	ENSG00000075624	actin beta	protein_coding	-0.66	12.03	0.00112426	0.00292962	-0.56	0.00201302
ASAP1	ENSG00000153317	ArfGAP with SH3 domain, ankyrin repeat and PH domain 1	protein_coding	-0.63	5.03	0.015524	0.0248585	-0.38	0.07264
RBM43	ENSG00000184898	RNA binding motif protein 43	protein_coding	-0.58	4.04	0.0129644	0.000829385	-0.45	0.0226107
ELF1	ENSG00000120690	E74 like ETS transcription factor 1	protein_coding	-0.45	6.17	0.0361026	0.0222625	-0.42	0.0389042
MORF4L1	ENSG00000185787	mortality factor 4 like 1	protein_coding	-0.42	7.64	0.00446342	0.00466188	-0.57	0.00158563
PTP4A2	ENSG00000184007	protein tyrosine phosphatase 4A2	protein_coding	-0.33	7.54	0.012273	0.000439058	-0.56	0.00178661
DDX24	ENSG00000089737	DEAD-box helicase 24	protein_coding	-0.3	7.67	0.0368664	0.0222625	-0.41	0.0481509
MIEF1	ENSG00000100335	mitochondrial elongation factor 1	protein_coding	0.36	5.71	0.0130396	0.00101768	0.51	0.00708093
SCP2	ENSG00000116171	sterol carrier protein 2	protein_coding	0.38	7.74	0.0177725	0.0107531	0.43	0.0335038
METTL9	ENSG00000197006	methyltransferase like 9	protein_coding	0.41	6.83	0.0159097	0.0122064	0.52	0.00527351
ABL2	ENSG00000143322	ABL proto-oncogene 2, non-receptor tyrosine kinase	protein_coding	0.44	4.99	0.0112673	0.00292962	0.55	0.00225163
ZNF281	ENSG00000162702	zinc finger protein 281	protein_coding	0.46	4.01	0.030509	0.00828562	0.43	0.0310185
MMACHC	ENSG00000132763	metabolism of cobalamin associated C	protein_coding	0.46	3.75	0.0116619	0.0157167	0.5	0.00781458
MTHFD1	ENSG00000100714	methylenetetrahydrofolate dehydrogenase, cyclohydrolase and formyltetrahydrofolate synthetase 1	protein_coding	0.47	5.84	0.000206675	0.000114847	0.69	2.63586e-05
USP22	ENSG00000124422	ubiquitin specific peptidase 22	protein_coding	0.48	7.99	0.00463983	0.00123271	0.53	0.00389508
LARP1	ENSG00000155506	La ribonucleoprotein 1, translational regulator	protein_coding	0.52	7.7	0.00123509	0.000551112	0.61	0.000440939
FKTN	ENSG00000106692	fukutin	protein_coding	0.53	4.63	0.00222407	0.000275416	0.53	0.00389508
CNNM2	ENSG00000148842	cyclin and CBS domain divalent metal cation transport mediator 2	protein_coding	0.54	4.44	0.00184427	0.00149145	0.6	0.000658982
LPAR2	ENSG00000064547	lysophosphatidic acid receptor 2	protein_coding	0.59	4.67	0.00373859	0.00178359	0.54	0.00352187
HSPA5	ENSG00000044574	heat shock protein family A (Hsp70) member 5	protein_coding	0.61	9.68	0.00265514	0.000829385	0.62	0.000290506
KDELR2	ENSG00000136240	KDEL endoplasmic reticulum protein retention receptor 2	protein_coding	0.61	8.67	2.93298e-05	0.000202437	0.72	5.66486e-06
AFDN	ENSG00000130396	afadin, adherens junction formation factor	protein_coding	0.61	7.65	0.0261093	0.0343796	0.36	0.0927924
BSG	ENSG00000172270	basigin (Ok blood group)	protein_coding	0.65	9.44	0.00906281	0.00537948	0.42	0.0389042
COG5	ENSG00000164597	component of oligomeric golgi complex 5	protein_coding	0.67	6.36	0.00221024	0.000829385	0.51	0.00642892
SATB2	ENSG00000119042	SATB homeobox 2	protein_coding	0.7	3.56	0.000395831	0.000439058	0.68	3.76404e-05
MAL2	ENSG00000147676	mal, T cell differentiation protein 2	protein_coding	0.8	6.99	0.0097436	0.0381054	0.58	0.00110189
IGF2R	ENSG00000197081	insulin like growth factor 2 receptor	protein_coding	0.8	7.9	0.00343368	0.000275416	0.53	0.00389508
LMO7	ENSG00000136153	LIM domain 7	protein_coding	0.86	6.63	0.00262857	0.00720585	0.5	0.00859453
TCAF1	ENSG00000198420	TRPM8 channel associated factor 1	protein_coding	0.86	5.75	6.28425e-05	0.000275416	0.67	5.31846e-05
ZNF850	ENSG00000267041	zinc finger protein 850	protein_coding	1.31	2.43	2.22559e-07	0.000114847	0.84	9.48803e-09
H2BC17	ENSG00000274641	H2B clustered histone 17	protein_coding	1.43	-3.07	0.00399497	0.00623949	0.53	0.00389508
MKI67	ENSG00000148773	marker of proliferation Ki-67	protein_coding	2.01	3.52	1.0927e-05	0.000114847	0.76	8.33232e-07
FSHB	ENSG00000131808	follicle stimulating hormone subunit beta	protein_coding	2.37	-3.61	0.00621177	0.0297528	0.5	0.00838545
PDLIM5	ENSG00000163110	PDZ and LIM domain 5	protein_coding	3.09	10.53	1.63077e-11	0.000114847	0.87	1.68462e-09

## Sheet: miR429
Gene name	Gene id	Description	Biotype	LogFC	LogCPM	QLF_FDR	MW_FDR	Spearman_correlation_coef	Spearman_correlation_FDR
SEMG1	ENSG00000124233	semenogelin 1	protein_coding	-12.92	13.99	0.000134205	0.00828562	-0.4	0.0517625
KRT24	ENSG00000167916	keratin 24	protein_coding	-6.55	0.09	4.61199e-06	0.00273984	-0.71	1.08128e-05
HOXB5	ENSG00000120075	homeobox B5	protein_coding	-5.97	1.84	2.44036e-05	0.00828562	-0.55	0.00283429
SLPI	ENSG00000124107	secretory leukocyte peptidase inhibitor	protein_coding	-4.88	7.76	0.00013839	0.0278207	-0.45	0.0226107
PON3	ENSG00000105852	paraoxonase 3	protein_coding	-3.37	1.07	0.000131948	0.000161482	-0.66	7.44181e-05
ANO1	ENSG00000131620	anoctamin 1	protein_coding	-3.22	7.08	1.93952e-05	0.000114847	-0.74	2.49306e-06
WDR72	ENSG00000166415	WD repeat domain 72	protein_coding	-3.21	0.1	0.000205595	0.000346309	-0.57	0.00158563
MSLN	ENSG00000102854	mesothelin	protein_coding	-3.05	3.78	0.00505649	0.0157167	-0.46	0.0176326
COLEC10	ENSG00000184374	collectin subfamily member 10	protein_coding	-2.96	-1.18	0.000199804	0.00149145	-0.57	0.00133131
TMEM171	ENSG00000157111	transmembrane protein 171	protein_coding	-2.87	-1.66	0.00171175	0.046735	-0.34	0.130818
LCN15	ENSG00000177984	lipocalin 15	protein_coding	-2.69	-0.57	0.010209	0.00342614	-0.36	0.0923228
MUC15	ENSG00000169550	mucin 15, cell surface associated	protein_coding	-2.68	2.44	0.00303428	0.00720585	-0.49	0.0103209
CEL	ENSG00000170835	carboxyl ester lipase	protein_coding	-2.58	1.39	1.94645e-05	0.000275416	-0.73	3.7856e-06
RNF182	ENSG00000180537	ring finger protein 182	protein_coding	-2.55	-0.18	3.95318e-05	0.000275416	-0.72	6.9242e-06
ABCG2	ENSG00000118777	ATP binding cassette subfamily G member 2 (Junior blood group)	protein_coding	-2.52	5.57	0.000163849	0.000202437	-0.64	0.000188327
DKK4	ENSG00000104371	dickkopf WNT signaling pathway inhibitor 4	protein_coding	-2.42	-2.1	0.000175835	0.00292962	-0.62	0.000336341
DUSP4	ENSG00000120875	dual specificity phosphatase 4	protein_coding	-2.32	6.01	0.00405434	0.0176367	-0.31	0.176394
NOX1	ENSG00000007952	NADPH oxidase 1	protein_coding	-2.29	2.24	0.00108797	0.0248585	-0.32	0.15946
ME1	ENSG00000065833	malic enzyme 1	protein_coding	-2.27	4.46	1.80925e-06	0.000202437	-0.81	3.89567e-08
TRIM61	ENSG00000183439	tripartite motif containing 61	protein_coding	-2.27	-1.55	1.01432e-05	0.000161482	-0.75	1.31492e-06
KCNK10	ENSG00000100433	potassium two pore domain channel subfamily K member 10	protein_coding	-2.24	-1.28	0.00434441	0.0323962	-0.36	0.0986852
BCO1	ENSG00000135697	beta-carotene oxygenase 1	protein_coding	-2.23	0.7	0.000369319	0.00943724	-0.49	0.0113268
SOSTDC1	ENSG00000171243	sclerostin domain containing 1	protein_coding	-2.22	1.59	6.87532e-06	0.000161482	-0.76	8.33232e-07
WNT7A	ENSG00000154764	Wnt family member 7A	protein_coding	-2.18	-1.15	0.00221406	0.00623949	-0.49	0.0113268
LGR6	ENSG00000133067	leucine rich repeat containing G protein-coupled receptor 6	protein_coding	-2.16	3.82	0.000857788	0.00292962	-0.71	1.02659e-05
CRIP1	ENSG00000213145	cysteine rich protein 1	protein_coding	-2.11	0.52	0.000512793	0.00537948	-0.45	0.0208349
FCRLB	ENSG00000162746	Fc receptor like B	protein_coding	-2.06	0.36	0.000220666	0.000161482	-0.66	8.72349e-05
TIMP4	ENSG00000157150	TIMP metallopeptidase inhibitor 4	protein_coding	-2.05	1.9	0.000173792	0.00342614	-0.54	0.00316034
C19orf33	ENSG00000167644	chromosome 19 open reading frame 33	protein_coding	-2.04	2.21	0.000479689	0.00342614	-0.59	0.000751544
ACSF2	ENSG00000167107	acyl-CoA synthetase family member 2	protein_coding	-2.03	4.74	1.92067e-06	0.000114847	-0.82	2.20719e-08
EPHB1	ENSG00000154928	EPH receptor B1	protein_coding	-2.01	2.72	0.000866981	0.000439058	-0.75	1.31492e-06
CCBE1	ENSG00000183287	collagen and calcium binding EGF domains 1	protein_coding	-2	2.63	3.97428e-05	0.00101768	-0.75	2.0088e-06
ZNF185	ENSG00000147394	zinc finger protein 185 with LIM domain	protein_coding	-1.99	6.51	2.19738e-05	0.000114847	-0.74	2.49306e-06
NAGS	ENSG00000161653	N-acetylglutamate synthase	protein_coding	-1.99	2.09	1.47789e-05	0.000114847	-0.72	5.66486e-06
KLK6	ENSG00000167755	kallikrein related peptidase 6	protein_coding	-1.98	-2.22	0.00417723	0.00466188	-0.46	0.0192099
CHP2	ENSG00000166869	calcineurin like EF-hand protein 2	protein_coding	-1.98	1.88	0.0116707	0.00466188	-0.59	0.000751544
FAM83B	ENSG00000168143	family with sequence similarity 83 member B	protein_coding	-1.96	1.74	0.000149542	0.000439058	-0.73	4.62163e-06
WNT10A	ENSG00000135925	Wnt family member 10A	protein_coding	-1.96	1.59	5.11482e-05	0.000202437	-0.69	2.19814e-05
FOXQ1	ENSG00000164379	forkhead box Q1	protein_coding	-1.92	3.09	0.00100175	0.0157167	-0.6	0.000578472
CHST4	ENSG00000140835	carbohydrate sulfotransferase 4	protein_coding	-1.91	-2.57	0.000434436	0.00828562	-0.55	0.00253493
UGT1A6	ENSG00000167165	UDP glucuronosyltransferase family 1 member A6	protein_coding	-1.9	-1.59	0.00328488	0.00123271	-0.49	0.00991279
CAV1	ENSG00000105974	caveolin 1	protein_coding	-1.87	7.28	5.12322e-06	0.000161482	-0.77	5.28648e-07
ALDH3A1	ENSG00000108602	aldehyde dehydrogenase 3 family member A1	protein_coding	-1.87	1.17	6.73878e-05	0.000114847	-0.74	2.49306e-06
TH	ENSG00000180176	tyrosine hydroxylase	protein_coding	-1.86	-3.14	0.000678978	0.000684911	-0.67	6.18879e-05
CHRDL1	ENSG00000101938	chordin like 1	protein_coding	-1.85	7.5	0.000333854	0.000202437	-0.71	1.02659e-05
FAM215A	ENSG00000267496	family with sequence similarity 215 member A	lncRNA	-1.85	-3.96	0.00334347	0.00273984	-0.63	0.000206646
COL17A1	ENSG00000065618	collagen type XVII alpha 1 chain	protein_coding	-1.84	6	0.000990679	0.00292962	-0.75	1.31492e-06
GPR87	ENSG00000138271	G protein-coupled receptor 87	protein_coding	-1.83	2.9	0.000837788	0.00123271	-0.68	4.49206e-05
HOXD13	ENSG00000128714	homeobox D13	protein_coding	-1.82	3.9	0.000788436	0.00149145	-0.69	2.19814e-05
DSG3	ENSG00000134757	desmoglein 3	protein_coding	-1.82	1.38	0.034025	0.0343796	-0.37	0.0904455
ASB4	ENSG00000005981	ankyrin repeat and SOCS box containing 4	protein_coding	-1.81	-2.06	0.00417005	0.00149145	-0.53	0.00411503
KRT23	ENSG00000108244	keratin 23	protein_coding	-1.81	4.75	0.00210991	0.00292962	-0.64	0.000188327
P2RY2	ENSG00000175591	purinergic receptor P2Y2	protein_coding	-1.8	1.31	0.000271652	0.00210559	-0.68	3.76404e-05
EDAR	ENSG00000135960	ectodysplasin A receptor	protein_coding	-1.8	0.91	0.0111455	0.0176367	-0.65	0.000102275
TMEM139	ENSG00000178826	transmembrane protein 139	protein_coding	-1.79	0.94	0.000207511	0.000161482	-0.61	0.000440939
TAGLN	ENSG00000149591	transgelin	protein_coding	-1.78	10.94	9.97762e-06	0.000275416	-0.74	2.49306e-06
IER3	ENSG00000137331	immediate early response 3	protein_coding	-1.78	5.68	0.00306843	0.000275416	-0.45	0.0245123
C6orf223	ENSG00000181577	chromosome 6 open reading frame 223	lncRNA	-1.76	-3.49	0.0105692	0.0176407	-0.38	0.0722
GJB4	ENSG00000189433	gap junction protein beta 4	protein_coding	-1.72	0.77	0.0111047	0.00943724	-0.65	0.000119183
CXCR2	ENSG00000180871	C-X-C motif chemokine receptor 2	protein_coding	-1.7	1.34	0.00632273	0.000684911	-0.52	0.00477303
INSC	ENSG00000188487	INSC spindle orientation adaptor protein	protein_coding	-1.7	-0.93	0.00247116	0.00466188	-0.58	0.00125093
PLP1	ENSG00000123560	proteolipid protein 1	protein_coding	-1.7	2.83	0.000206675	0.000161482	-0.66	8.72349e-05
MAMLD1	ENSG00000013619	mastermind like domain containing 1	protein_coding	-1.65	3.33	9.61145e-07	0.000114847	-0.79	1.56698e-07
FGF20	ENSG00000078579	fibroblast growth factor 20	protein_coding	-1.65	-2.63	0.00119314	0.000161482	-0.63	0.000217888
TGFB1I1	ENSG00000140682	transforming growth factor beta 1 induced transcript 1	protein_coding	-1.64	6.33	1.1982e-05	0.000346309	-0.76	1.05578e-06
BMP7	ENSG00000101144	bone morphogenetic protein 7	protein_coding	-1.63	4.14	8.40827e-05	0.000202437	-0.71	8.43322e-06
ST6GALNAC2	ENSG00000070731	ST6 N-acetylgalactosaminide alpha-2,6-sialyltransferase 2	protein_coding	-1.63	3.66	1.29661e-05	0.000275416	-0.77	6.59659e-07
LAMB3	ENSG00000196878	laminin subunit beta 3	protein_coding	-1.61	6.69	0.00239273	0.00292962	-0.68	3.16136e-05
BCL11A	ENSG00000119866	BAF chromatin remodeling complex subunit BCL11A	protein_coding	-1.61	3.3	0.00165835	0.00943724	-0.6	0.000578472
DDIT4	ENSG00000168209	DNA damage inducible transcript 4	protein_coding	-1.6	6.18	3.31145e-05	0.000161482	-0.66	7.44181e-05
CAV2	ENSG00000105971	caveolin 2	protein_coding	-1.59	5.36	3.23364e-07	0.000202437	-0.78	3.19515e-07
YBX2	ENSG00000006047	Y-box binding protein 2	protein_coding	-1.59	0.57	0.000127692	0.00101768	-0.61	0.000506304
NAV2	ENSG00000166833	neuron navigator 2	protein_coding	-1.59	4.84	1.33355e-05	0.000114847	-0.74	3.09184e-06
PRODH	ENSG00000100033	proline dehydrogenase 1	protein_coding	-1.58	0.34	0.000648298	0.00466188	-0.68	3.16136e-05
EPHA2	ENSG00000142627	EPH receptor A2	protein_coding	-1.56	5.18	0.0154947	0.0381054	-0.62	0.000290506
PNMA2	ENSG00000240694	PNMA family member 2	protein_coding	-1.56	1.2	0.0046102	0.00720585	-0.53	0.00389508
CFL2	ENSG00000165410	cofilin 2	protein_coding	-1.55	6.72	1.4525e-05	0.000346309	-0.71	1.02659e-05
AHNAK2	ENSG00000185567	AHNAK nucleoprotein 2	protein_coding	-1.55	6.02	0.000789164	0.00123271	-0.6	0.000578472
JAZF1	ENSG00000153814	JAZF zinc finger 1	protein_coding	-1.55	5.3	4.88153e-05	0.000439058	-0.71	1.02659e-05
TMEM158	ENSG00000249992	transmembrane protein 158	protein_coding	-1.55	4.57	7.92996e-05	0.000275416	-0.59	0.000751544
MAMDC2	ENSG00000165072	MAM domain containing 2	protein_coding	-1.55	3.52	0.000134596	0.000161482	-0.7	1.50087e-05
TGFBR3	ENSG00000069702	transforming growth factor beta receptor 3	protein_coding	-1.53	6.31	6.30998e-05	0.000275416	-0.65	0.000139193
TCF7L1	ENSG00000152284	transcription factor 7 like 1	protein_coding	-1.52	4.64	3.40422e-07	0.000114847	-0.81	6.7957e-08
IGF2	ENSG00000167244	insulin like growth factor 2	protein_coding	-1.5	5.14	0.00105369	0.00720585	-0.6	0.000658982
PALLD	ENSG00000129116	palladin, cytoskeletal associated protein	protein_coding	-1.49	8.77	8.44563e-05	0.000275416	-0.71	1.02659e-05
WWC3	ENSG00000047644	WWC family member 3	protein_coding	-1.49	6.56	0.000567765	0.000439058	-0.7	1.82219e-05
MYBPHL	ENSG00000221986	myosin binding protein H like	protein_coding	-1.49	-3.45	0.0170728	0.0323962	-0.52	0.0050855
ATP1B1	ENSG00000143153	ATPase Na+/K+ transporting subunit beta 1	protein_coding	-1.47	6.66	1.05772e-05	0.000275416	-0.77	5.28648e-07
HSD11B1	ENSG00000117594	hydroxysteroid 11-beta dehydrogenase 1	protein_coding	-1.47	3.19	0.00620052	0.00342614	-0.45	0.0245123
DNAJC15	ENSG00000120675	DnaJ heat shock protein family (Hsp40) member C15	protein_coding	-1.46	4.84	0.00416414	0.00249166	-0.44	0.0264368
ANP32E	ENSG00000143401	acidic nuclear phosphoprotein 32 family member E	protein_coding	-1.46	5.11	4.70204e-07	0.000114847	-0.81	6.7957e-08
TLE6	ENSG00000104953	TLE family member 6, subcortical maternal complex member	protein_coding	-1.43	0.76	0.00228121	0.0107531	-0.49	0.0113268
SOX2	ENSG00000181449	SRY-box transcription factor 2	protein_coding	-1.42	2.23	0.0217698	0.0222625	-0.5	0.00781458
TINAGL1	ENSG00000142910	tubulointerstitial nephritis antigen like 1	protein_coding	-1.42	5.94	5.26005e-06	0.000114847	-0.77	6.59659e-07
CHST11	ENSG00000171310	carbohydrate sulfotransferase 11	protein_coding	-1.41	4.28	4.24322e-05	0.000161482	-0.68	3.16136e-05
NT5E	ENSG00000135318	5'-nucleotidase ecto	protein_coding	-1.41	4.41	1.93389e-05	0.000114847	-0.71	1.02659e-05
ZNF711	ENSG00000147180	zinc finger protein 711	protein_coding	-1.39	2.22	4.52785e-05	0.000829385	-0.66	7.44181e-05
SLC38A5	ENSG00000017483	solute carrier family 38 member 5	protein_coding	-1.39	2.36	6.67526e-05	0.000551112	-0.69	2.63586e-05
SAMD14	ENSG00000167100	sterile alpha motif domain containing 14	protein_coding	-1.39	2.11	4.76865e-05	0.00123271	-0.71	1.24515e-05
DZIP1	ENSG00000134874	DAZ interacting zinc finger protein 1	protein_coding	-1.38	3.97	3.00214e-06	0.000114847	-0.78	4.08922e-07
MYORG	ENSG00000164976	myogenesis regulating glycosidase (putative)	protein_coding	-1.38	3.88	2.17327e-06	0.000275416	-0.75	1.31492e-06
FOXF1	ENSG00000103241	forkhead box F1	protein_coding	-1.37	5.17	0.00331891	0.0122064	-0.42	0.0416591
TUBA1A	ENSG00000167552	tubulin alpha 1a	protein_coding	-1.36	7.2	1.31943e-05	0.00292962	-0.69	2.19814e-05
MRAP2	ENSG00000135324	melanocortin 2 receptor accessory protein 2	protein_coding	-1.35	3.11	0.000111808	0.00210559	-0.68	4.49206e-05
CCDC80	ENSG00000091986	coiled-coil domain containing 80	protein_coding	-1.35	7.03	0.0116707	0.0278207	-0.44	0.0286638
S100A3	ENSG00000188015	S100 calcium binding protein A3	protein_coding	-1.33	-0.43	0.00113373	0.00342614	-0.5	0.00781458
KANK2	ENSG00000197256	KN motif and ankyrin repeat domains 2	protein_coding	-1.32	7.84	2.59056e-05	0.000346309	-0.73	3.7856e-06
TRIM6	ENSG00000121236	tripartite motif containing 6	protein_coding	-1.32	2.01	2.01175e-05	0.000114847	-0.75	1.62234e-06
PNMA1	ENSG00000176903	PNMA family member 1	protein_coding	-1.32	6.46	7.12122e-05	0.00123271	-0.69	2.19814e-05
CCND2	ENSG00000118971	cyclin D2	protein_coding	-1.31	6.64	0.00131613	0.00123271	-0.64	0.000188327
ITPR1	ENSG00000150995	inositol 1,4,5-trisphosphate receptor type 1	protein_coding	-1.31	7.16	0.00488262	0.00720585	-0.5	0.00781458
NRP2	ENSG00000118257	neuropilin 2	protein_coding	-1.3	5.37	0.000919362	0.00466188	-0.59	0.000853427
GPR161	ENSG00000143147	G protein-coupled receptor 161	protein_coding	-1.3	5.28	4.68733e-05	0.000684911	-0.63	0.000217888
HOXD11	ENSG00000128713	homeobox D11	protein_coding	-1.29	1.64	0.00631537	0.0248585	-0.57	0.00158563
RND3	ENSG00000115963	Rho family GTPase 3	protein_coding	-1.28	5.72	0.000206619	0.00342614	-0.68	4.49206e-05
TNIK	ENSG00000154310	TRAF2 and NCK interacting kinase	protein_coding	-1.28	3.5	0.00447722	0.00398843	-0.54	0.00352187
DKK3	ENSG00000050165	dickkopf WNT signaling pathway inhibitor 3	protein_coding	-1.28	6.91	0.000213045	0.00123271	-0.68	3.16136e-05
PGAP4	ENSG00000165152	post-GPI attachment to proteins GalNAc transferase 4	protein_coding	-1.28	4.31	0.000433601	0.00466188	-0.68	3.16136e-05
AKR1C2	ENSG00000151632	aldo-keto reductase family 1 member C2	protein_coding	-1.27	1.23	0.000451	0.000439058	-0.62	0.000290506
CLDN14	ENSG00000159261	claudin 14	protein_coding	-1.26	-2.31	0.0193193	0.00720585	-0.54	0.00352187
REEP1	ENSG00000068615	receptor accessory protein 1	protein_coding	-1.26	3.86	6.90586e-05	0.000551112	-0.66	8.72349e-05
SLC4A11	ENSG00000088836	solute carrier family 4 member 11	protein_coding	-1.26	2.87	0.00022219	0.000439058	-0.63	0.000217888
LY75	ENSG00000054219	lymphocyte antigen 75	protein_coding	-1.26	1.93	0.000773581	0.00178359	-0.58	0.000970096
ARHGEF19	ENSG00000142632	Rho guanine nucleotide exchange factor 19	protein_coding	-1.25	4.07	0.000768368	0.000275416	-0.64	0.000163181
CAVIN1	ENSG00000177469	caveolae associated protein 1	protein_coding	-1.25	9.07	0.000227662	0.00178359	-0.66	7.44181e-05
C8orf48	ENSG00000164743	chromosome 8 open reading frame 48	protein_coding	-1.24	-2.57	0.0049723	0.000829385	-0.62	0.000336341
SEC23A	ENSG00000100934	Sec23 homolog A, COPII coat complex component	protein_coding	-1.23	6.04	1.18486e-05	0.000202437	-0.77	6.59659e-07
GPX8	ENSG00000164294	glutathione peroxidase 8 (putative)	protein_coding	-1.23	4.27	0.000122711	0.00101768	-0.71	1.02659e-05
RAB11FIP2	ENSG00000107560	RAB11 family interacting protein 2	protein_coding	-1.23	5.55	0.000209626	0.000202437	-0.62	0.000385369
BDKRB2	ENSG00000168398	bradykinin receptor B2	protein_coding	-1.23	3.04	0.0116777	0.0222625	-0.42	0.0389042
TMSB15B	ENSG00000269226	thymosin beta 15B [Source:NCBI gene (formerly Entrezgene)	protein_coding	-1.22	-3.35	0.0119592	0.00828562	-0.55	0.00225163
GJC2	ENSG00000198835	gap junction protein gamma 2	protein_coding	-1.2	1.11	0.00055374	0.000202437	-0.62	0.000290506
WNT16	ENSG00000002745	Wnt family member 16	protein_coding	-1.19	-0.08	0.0116132	0.00828562	-0.55	0.00283429
MATN3	ENSG00000132031	matrilin 3	protein_coding	-1.19	1.15	0.000589877	0.00101768	-0.59	0.000853427
PEAK1	ENSG00000173517	pseudopodium enriched atypical kinase 1	protein_coding	-1.19	5.51	0.000904556	0.000829385	-0.58	0.000970096
ASXL3	ENSG00000141431	ASXL transcriptional regulator 3	protein_coding	-1.19	1.9	0.000601257	0.000684911	-0.61	0.000506304
EPSTI1	ENSG00000133106	epithelial stromal interaction 1	protein_coding	-1.19	2.52	0.00233203	0.000275416	-0.59	0.000853427
C3orf70	ENSG00000187068	chromosome 3 open reading frame 70	protein_coding	-1.19	4.59	0.000330311	0.00292962	-0.63	0.000251428
VWA5A	ENSG00000110002	von Willebrand factor A domain containing 5A	protein_coding	-1.19	4.9	2.26297e-05	0.000114847	-0.78	2.50802e-07
SCUBE3	ENSG00000146197	signal peptide, CUB domain and EGF like domain containing 3	protein_coding	-1.19	3.33	0.00257826	0.00720585	-0.49	0.00942878
SLFN12	ENSG00000172123	schlafen family member 12	protein_coding	-1.18	1.46	0.00268274	0.000346309	-0.6	0.000658982
LAPTM4B	ENSG00000104341	lysosomal protein transmembrane 4 beta	protein_coding	-1.18	5.6	2.86825e-05	0.000114847	-0.76	8.33232e-07
ARSL	ENSG00000157399	arylsulfatase L	protein_coding	-1.18	-0.19	0.00519114	0.00828562	-0.55	0.00253493
CAVIN3	ENSG00000170955	caveolae associated protein 3	protein_coding	-1.18	3.8	0.00297716	0.00210559	-0.59	0.000853427
PLCD3	ENSG00000161714	phospholipase C delta 3	protein_coding	-1.17	4.82	3.42901e-05	0.000275416	-0.69	2.63586e-05
IL18	ENSG00000150782	interleukin 18	protein_coding	-1.16	2.26	0.00200831	0.0176367	-0.43	0.0310185
TIMP2	ENSG00000035862	TIMP metallopeptidase inhibitor 2	protein_coding	-1.15	8.48	0.000156585	0.000829385	-0.65	0.000102275
ANXA1	ENSG00000135046	annexin A1	protein_coding	-1.15	7.56	0.000551717	0.00210559	-0.63	0.000251428
BCL2	ENSG00000171791	BCL2 apoptosis regulator	protein_coding	-1.14	5.28	0.000522999	0.00123271	-0.65	0.000139193
ASPH	ENSG00000198363	aspartate beta-hydroxylase	protein_coding	-1.14	6.64	1.91944e-05	0.000114847	-0.77	6.59659e-07
ZEB2	ENSG00000169554	zinc finger E-box binding homeobox 2	protein_coding	-1.13	5.45	0.00281109	0.00342614	-0.5	0.00781458
CARD6	ENSG00000132357	caspase recruitment domain family member 6	protein_coding	-1.12	2.2	0.000550756	0.00123271	-0.57	0.00140874
ANKRD33B	ENSG00000164236	ankyrin repeat domain 33B	protein_coding	-1.11	2.9	0.0250692	0.0222625	-0.46	0.0192099
CASP1	ENSG00000137752	caspase 1	protein_coding	-1.11	3.2	0.000215077	0.00342614	-0.66	8.72349e-05
GRIP1	ENSG00000155974	glutamate receptor interacting protein 1	protein_coding	-1.1	3.25	0.00171175	0.0222625	-0.57	0.00158563
HOXD10	ENSG00000128710	homeobox D10	protein_coding	-1.09	2.75	0.0144637	0.0248585	-0.52	0.00584249
PLD1	ENSG00000075651	phospholipase D1	protein_coding	-1.09	3.33	2.85166e-05	0.000439058	-0.69	2.63586e-05
LARGE1	ENSG00000133424	LARGE xylosyl- and glucuronyltransferase 1	protein_coding	-1.09	5.67	0.000537031	0.00398843	-0.58	0.00125093
JDP2	ENSG00000140044	Jun dimerization protein 2	protein_coding	-1.08	4.25	0.000320755	0.00398843	-0.68	4.49206e-05
PLAU	ENSG00000122861	plasminogen activator, urokinase	protein_coding	-1.06	4.01	0.000432589	0.000275416	-0.64	0.000188327
COL4A4	ENSG00000081052	collagen type IV alpha 4 chain	protein_coding	-1.06	3.83	0.00185124	0.0107531	-0.47	0.0161847
NKD1	ENSG00000140807	NKD inhibitor of WNT signaling pathway 1	protein_coding	-1.06	3.95	0.0132214	0.0198496	-0.49	0.0103209
STK26	ENSG00000134602	serine/threonine kinase 26	protein_coding	-1.06	5.25	2.23752e-05	0.000829385	-0.71	1.24515e-05
ACSL4	ENSG00000068366	acyl-CoA synthetase long chain family member 4	protein_coding	-1.05	5.23	0.00013774	0.00249166	-0.65	0.000102275
ANKDD1A	ENSG00000166839	ankyrin repeat and death domain containing 1A	protein_coding	-1.04	2.96	0.000102917	0.000275416	-0.63	0.000251428
FHL2	ENSG00000115641	four and a half LIM domains 2	protein_coding	-1.03	6.47	0.00126754	0.00828562	-0.65	0.000139193
PCDH9	ENSG00000184226	protocadherin 9	protein_coding	-1.03	2.91	0.00326596	0.00398843	-0.58	0.00110189
MBNL2	ENSG00000139793	muscleblind like splicing regulator 2	protein_coding	-1.02	6.12	2.95471e-05	0.000114847	-0.71	8.43322e-06
PJA1	ENSG00000181191	praja ring finger ubiquitin ligase 1	protein_coding	-1.02	5.34	0.000256676	0.000161482	-0.7	1.82219e-05
DENND2A	ENSG00000146966	DENN domain containing 2A	protein_coding	-1.02	3.7	0.00461789	0.0176367	-0.46	0.0176326
ZEB1	ENSG00000148516	zinc finger E-box binding homeobox 1	protein_coding	-1	5.35	0.000729338	0.00249166	-0.62	0.000290506
NDN	ENSG00000182636	necdin, MAGE family member	protein_coding	-1	5.41	8.21413e-06	0.000346309	-0.72	5.66486e-06
SUSD5	ENSG00000173705	sushi domain containing 5	protein_coding	-1	1.68	0.0163411	0.046735	-0.47	0.0161847
FADS1	ENSG00000149485	fatty acid desaturase 1	protein_coding	-0.99	5.62	0.000783437	0.000275416	-0.59	0.000853427
SH3PXD2A	ENSG00000107957	SH3 and PX domains 2A	protein_coding	-0.99	6.15	4.48658e-05	0.00123271	-0.65	0.000139193
TMSB15B	ENSG00000158427	thymosin beta 15B	protein_coding	-0.99	-2.3	0.0208453	0.0381054	-0.49	0.00942878
KIF7	ENSG00000166813	kinesin family member 7	protein_coding	-0.98	3.41	0.000211594	0.00178359	-0.65	0.000139193
PITPNM3	ENSG00000091622	PITPNM family member 3	protein_coding	-0.98	4.23	3.53074e-05	0.000439058	-0.72	6.9242e-06
MROH6	ENSG00000204839	maestro heat like repeat family member 6	protein_coding	-0.97	1.09	0.00238254	0.000346309	-0.63	0.000251428
CLEC2B	ENSG00000110852	C-type lectin domain family 2 member B	protein_coding	-0.95	2.3	0.00297707	0.0157167	-0.5	0.00859453
ADGRG5	ENSG00000159618	adhesion G protein-coupled receptor G5	protein_coding	-0.95	0.52	0.00807337	0.00537948	-0.55	0.00253493
GSN	ENSG00000148180	gelsolin	protein_coding	-0.94	9.1	0.000682733	0.00178359	-0.59	0.000853427
LHFPL2	ENSG00000145685	LHFPL tetraspan subfamily member 2	protein_coding	-0.94	4.9	0.000636376	0.00342614	-0.58	0.00125093
RBMS1	ENSG00000153250	RNA binding motif single stranded interacting protein 1	protein_coding	-0.93	5.54	3.48958e-06	0.000275416	-0.78	3.19515e-07
ALDH3B1	ENSG00000006534	aldehyde dehydrogenase 3 family member B1	protein_coding	-0.93	3.01	0.000262552	0.000439058	-0.63	0.000217888
CYP2S1	ENSG00000167600	cytochrome P450 family 2 subfamily S member 1	protein_coding	-0.92	1.43	0.00676049	0.0248585	-0.53	0.00389508
CELSR2	ENSG00000143126	cadherin EGF LAG seven-pass G-type receptor 2	protein_coding	-0.91	5.51	0.00114985	0.00398843	-0.57	0.00140874
SNCAIP	ENSG00000064692	synuclein alpha interacting protein	protein_coding	-0.9	2.88	0.0207244	0.0310182	-0.45	0.0226107
TENT5A	ENSG00000112773	terminal nucleotidyltransferase 5A	protein_coding	-0.9	5.31	0.0358085	0.00943724	-0.48	0.0135942
CDKN2B	ENSG00000147883	cyclin dependent kinase inhibitor 2B	protein_coding	-0.89	3.46	0.00757042	0.0421612	-0.48	0.0135942
ADCY9	ENSG00000162104	adenylate cyclase 9	protein_coding	-0.88	4.78	0.0016822	0.00249166	-0.55	0.00253493
DPYSL2	ENSG00000092964	dihydropyrimidinase like 2	protein_coding	-0.88	5.74	0.00148797	0.00342614	-0.56	0.00201302
FCGRT	ENSG00000104870	Fc fragment of IgG receptor and transporter	protein_coding	-0.88	6.54	9.88816e-06	0.000161482	-0.78	2.50802e-07
SHF	ENSG00000138606	Src homology 2 domain containing F	protein_coding	-0.88	3	4.31885e-05	0.000684911	-0.74	2.49306e-06
TNFRSF25	ENSG00000215788	TNF receptor superfamily member 25	protein_coding	-0.87	1.58	0.0150904	0.00828562	-0.43	0.0310185
LAMP3	ENSG00000078081	lysosomal associated membrane protein 3	protein_coding	-0.86	2.98	0.0120514	0.0176367	-0.56	0.00201302
DSE	ENSG00000111817	dermatan sulfate epimerase	protein_coding	-0.86	4.51	0.000610011	0.000346309	-0.62	0.000336341
NR2F1	ENSG00000175745	nuclear receptor subfamily 2 group F member 1	protein_coding	-0.86	5.82	0.0033046	0.00537948	-0.44	0.0286638
CIB2	ENSG00000136425	calcium and integrin binding family member 2	protein_coding	-0.85	3.73	0.0145097	0.0278207	-0.43	0.0310185
WNT5B	ENSG00000111186	Wnt family member 5B	protein_coding	-0.85	5.7	0.00807313	0.0248585	-0.48	0.0135942
GPAT3	ENSG00000138678	glycerol-3-phosphate acyltransferase 3	protein_coding	-0.85	1.36	0.00934829	0.00720585	-0.59	0.000751544
CDKN1C	ENSG00000129757	cyclin dependent kinase inhibitor 1C	protein_coding	-0.84	4.52	0.000580874	0.00623949	-0.67	5.31846e-05
SLC16A3	ENSG00000141526	solute carrier family 16 member 3	protein_coding	-0.84	3.83	0.004051	0.00720585	-0.52	0.00477303
EOGT	ENSG00000163378	EGF domain specific O-linked N-acetylglucosamine transferase	protein_coding	-0.84	5.13	5.2329e-05	0.000829385	-0.69	2.19814e-05
AHR	ENSG00000106546	aryl hydrocarbon receptor	protein_coding	-0.83	5.85	0.00461941	0.00828562	-0.48	0.0124192
TMEM237	ENSG00000155755	transmembrane protein 237	protein_coding	-0.83	4.68	6.68438e-05	0.00249166	-0.68	3.76404e-05
LOXL3	ENSG00000115318	lysyl oxidase like 3	protein_coding	-0.83	1.86	0.0032383	0.00466188	-0.45	0.0208349
ADA2	ENSG00000093072	adenosine deaminase 2	protein_coding	-0.83	5.69	0.00285678	0.0222625	-0.54	0.00316034
AXL	ENSG00000167601	AXL receptor tyrosine kinase	protein_coding	-0.82	5.55	0.00192561	0.00342614	-0.55	0.00283429
MFGE8	ENSG00000140545	milk fat globule EGF and factor V/VIII domain containing	protein_coding	-0.81	6.74	0.00471004	0.00466188	-0.52	0.00477303
AATK	ENSG00000181409	apoptosis associated tyrosine kinase	protein_coding	-0.81	2.09	0.00210543	0.000829385	-0.59	0.000751544
MB21D2	ENSG00000180611	Mab-21 domain containing 2	protein_coding	-0.81	1.74	0.00302388	0.00123271	-0.59	0.000853427
NRM	ENSG00000137404	nurim	protein_coding	-0.81	3.14	0.000607305	0.000202437	-0.65	0.000102275
MXRA5	ENSG00000101825	matrix remodeling associated 5	protein_coding	-0.81	6	0.025411	0.0343796	-0.43	0.0310185
STX1B	ENSG00000099365	syntaxin 1B	protein_coding	-0.81	0.06	0.00354527	0.00466188	-0.57	0.00140874
NPTN	ENSG00000156642	neuroplastin	protein_coding	-0.8	7.36	3.7092e-05	0.000275416	-0.76	1.05578e-06
ITGA2	ENSG00000164171	integrin subunit alpha 2	protein_coding	-0.78	5.48	0.0176607	0.00249166	-0.5	0.00781458
ECM1	ENSG00000143369	extracellular matrix protein 1	protein_coding	-0.78	3.79	0.0209402	0.0421612	-0.39	0.0636183
ALOX5AP	ENSG00000132965	arachidonate 5-lipoxygenase activating protein	protein_coding	-0.78	2.45	0.0196946	0.0310182	-0.42	0.0389042
SLC16A2	ENSG00000147100	solute carrier family 16 member 2	protein_coding	-0.78	4.63	0.00334112	0.0122064	-0.56	0.00201302
STING1	ENSG00000184584	stimulator of interferon response cGAMP interactor 1	protein_coding	-0.78	5.37	0.00917768	0.00943724	-0.54	0.00352187
PRRG4	ENSG00000135378	proline rich and Gla domain 4	protein_coding	-0.77	5.23	0.00127482	0.00292962	-0.58	0.00125093
GAS2	ENSG00000148935	growth arrest specific 2	protein_coding	-0.77	0.25	0.029366	0.0122064	-0.46	0.0176326
PHLDB1	ENSG00000019144	pleckstrin homology like domain family B member 1	protein_coding	-0.77	5.74	0.000446507	0.00537948	-0.6	0.000578472
OXR1	ENSG00000164830	oxidation resistance 1	protein_coding	-0.77	5.62	0.00350819	0.000161482	-0.52	0.00477303
KANK1	ENSG00000107104	KN motif and ankyrin repeat domains 1	protein_coding	-0.76	6.71	0.000526556	0.0122064	-0.57	0.00158563
ALDOC	ENSG00000109107	aldolase, fructose-bisphosphate C	protein_coding	-0.76	4.48	0.00100379	0.00249166	-0.62	0.000290506
EPS8	ENSG00000151491	epidermal growth factor receptor pathway substrate 8	protein_coding	-0.76	5.37	0.00309313	0.00210559	-0.53	0.00389508
DIXDC1	ENSG00000150764	DIX domain containing 1	protein_coding	-0.76	6.14	0.00504825	0.00101768	-0.53	0.00389508
IQCK	ENSG00000174628	IQ motif containing K	protein_coding	-0.76	3.24	0.00154787	0.00398843	-0.62	0.000336341
RGL1	ENSG00000143344	ral guanine nucleotide dissociation stimulator like 1	protein_coding	-0.76	5.06	0.0107339	0.0198496	-0.48	0.0124192
TRIM16	ENSG00000221926	tripartite motif containing 16	protein_coding	-0.74	3.1	0.00574127	0.00292962	-0.51	0.00642892
NR3C1	ENSG00000113580	nuclear receptor subfamily 3 group C member 1	protein_coding	-0.73	6.16	0.000335301	0.000551112	-0.63	0.000217888
FAM13B	ENSG00000031003	family with sequence similarity 13 member B	protein_coding	-0.73	6.03	0.00112027	0.00210559	-0.55	0.00283429
MTSS2	ENSG00000132613	MTSS I-BAR domain containing 2	protein_coding	-0.73	4.55	0.000137517	0.000829385	-0.7	1.50087e-05
RAP1A	ENSG00000116473	RAP1A, member of RAS oncogene family	protein_coding	-0.72	6.5	9.1185e-05	0.000114847	-0.7	1.82219e-05
MX1	ENSG00000157601	MX dynamin like GTPase 1	protein_coding	-0.72	5.19	0.0240973	0.00178359	-0.49	0.0103209
RNF122	ENSG00000133874	ring finger protein 122	protein_coding	-0.72	3.16	0.0136763	0.0421612	-0.42	0.0361563
PTPN14	ENSG00000152104	protein tyrosine phosphatase non-receptor type 14	protein_coding	-0.71	6.21	0.00467448	0.00466188	-0.5	0.00859453
ST3GAL2	ENSG00000157350	ST3 beta-galactoside alpha-2,3-sialyltransferase 2	protein_coding	-0.71	4.44	0.000169506	0.000551112	-0.68	3.76404e-05
POGLUT2	ENSG00000134901	protein O-glucosyltransferase 2	protein_coding	-0.71	1.87	0.00877706	0.00720585	-0.48	0.0135942
SLC44A1	ENSG00000070214	solute carrier family 44 member 1	protein_coding	-0.7	6.44	0.00125565	0.00623949	-0.56	0.00201302
SPSB1	ENSG00000171621	splA/ryanodine receptor domain and SOCS box containing 1	protein_coding	-0.7	4.56	0.0206484	0.00828562	-0.48	0.0124192
CCDC68	ENSG00000166510	coiled-coil domain containing 68	protein_coding	-0.7	2.36	0.018465	0.0278207	-0.46	0.0192099
DCBLD2	ENSG00000057019	discoidin, CUB and LCCL domain containing 2	protein_coding	-0.69	5.42	3.38185e-05	0.000161482	-0.75	1.62234e-06
QKI	ENSG00000112531	QKI, KH domain containing RNA binding	protein_coding	-0.68	5.98	0.0019929	0.00123271	-0.57	0.00140874
SNAPC1	ENSG00000023608	small nuclear RNA activating complex polypeptide 1	protein_coding	-0.68	3.4	0.000145534	0.000439058	-0.71	8.43322e-06
SPRY2	ENSG00000136158	sprouty RTK signaling antagonist 2	protein_coding	-0.68	4.75	0.000208545	0.000202437	-0.7	1.50087e-05
CBX6	ENSG00000183741	chromobox 6	protein_coding	-0.68	6.96	0.00395733	0.00720585	-0.54	0.00352187
CEBPB	ENSG00000172216	CCAAT enhancer binding protein beta	protein_coding	-0.67	5.21	0.0241402	0.00720585	-0.45	0.0226107
CNTNAP1	ENSG00000108797	contactin associated protein 1	protein_coding	-0.67	3.58	0.0297991	0.0278207	-0.48	0.0135942
STARD5	ENSG00000172345	StAR related lipid transfer domain containing 5	protein_coding	-0.66	2.16	0.00682186	0.0222625	-0.46	0.0192099
CEP162	ENSG00000135315	centrosomal protein 162	protein_coding	-0.66	3.14	0.00126754	0.000114847	-0.63	0.000251428
GBGT1	ENSG00000148288	globoside alpha-1,3-N-acetylgalactosaminyltransferase 1 (FORS blood group)	protein_coding	-0.65	2.39	0.00283796	0.00101768	-0.68	4.49206e-05
BBX	ENSG00000114439	BBX high mobility group box domain containing	protein_coding	-0.64	7	0.00422942	0.000161482	-0.48	0.0124192
CD274	ENSG00000120217	CD274 molecule	protein_coding	-0.64	1.41	0.039065	0.000829385	-0.51	0.00708093
FYN	ENSG00000010810	FYN proto-oncogene, Src family tyrosine kinase	protein_coding	-0.64	3.98	0.00531089	0.00210559	-0.49	0.0113268
MBNL1	ENSG00000152601	muscleblind like splicing regulator 1	protein_coding	-0.64	7.36	0.00103473	0.000551112	-0.61	0.000440939
LRRC49	ENSG00000137821	leucine rich repeat containing 49	protein_coding	-0.64	3.54	0.000651408	0.00398843	-0.63	0.000217888
JAG2	ENSG00000184916	jagged canonical Notch ligand 2	protein_coding	-0.63	5.1	0.00713673	0.0138685	-0.49	0.00942878
PLCG2	ENSG00000197943	phospholipase C gamma 2	protein_coding	-0.63	3.23	0.00999246	0.00292962	-0.53	0.00431149
RAB32	ENSG00000118508	RAB32, member RAS oncogene family	protein_coding	-0.63	3.43	0.0148073	0.0343796	-0.49	0.0103209
ENAH	ENSG00000154380	ENAH actin regulator	protein_coding	-0.63	7.47	0.000612031	0.00149145	-0.58	0.00110189
TRPS1	ENSG00000104447	transcriptional repressor GATA binding 1	protein_coding	-0.61	5.25	0.0407327	0.00828562	-0.37	0.0817378
RBFOX2	ENSG00000100320	RNA binding fox-1 homolog 2	protein_coding	-0.61	6.9	0.000594347	0.00178359	-0.58	0.000970096
PPP1R18	ENSG00000146112	protein phosphatase 1 regulatory subunit 18	protein_coding	-0.6	5.09	0.0130953	0.0157167	-0.48	0.0135942
DNAJC27	ENSG00000115137	DnaJ heat shock protein family (Hsp40) member C27	protein_coding	-0.6	3.03	0.00129907	0.00342614	-0.64	0.000163181
POGLUT3	ENSG00000178202	protein O-glucosyltransferase 3	protein_coding	-0.6	6.03	0.0123022	0.0107531	-0.5	0.00859453
RBMS2	ENSG00000076067	RNA binding motif single stranded interacting protein 2	protein_coding	-0.59	5.22	0.000687083	0.000684911	-0.62	0.000385369
SH3BGRL	ENSG00000131171	SH3 domain binding glutamate rich protein like	protein_coding	-0.59	7.54	0.0101802	0.0138685	-0.47	0.0148392
MAP3K14	ENSG00000006062	mitogen-activated protein kinase kinase kinase 14	protein_coding	-0.59	4.38	0.00959128	0.0107531	-0.54	0.00316034
IKBIP	ENSG00000166130	IKBKB interacting protein	protein_coding	-0.58	3.36	0.0090205	0.0176367	-0.58	0.00125093
VAMP1	ENSG00000139190	vesicle associated membrane protein 1	protein_coding	-0.58	2.79	0.0184847	0.00342614	-0.51	0.00642892
MPRIP	ENSG00000133030	myosin phosphatase Rho interacting protein	protein_coding	-0.57	7.2	0.000620135	0.00342614	-0.68	3.16136e-05
DPH3	ENSG00000154813	diphthamide biosynthesis 3	protein_coding	-0.57	4.65	0.00062	0.000275416	-0.68	3.16136e-05
DRAM1	ENSG00000136048	DNA damage regulated autophagy modulator 1	protein_coding	-0.56	4.27	0.0416781	0.0381054	-0.48	0.0135942
KLHL42	ENSG00000087448	kelch like family member 42	protein_coding	-0.55	5.63	0.0101551	0.0107531	-0.45	0.0208349
SLC35G1	ENSG00000176273	solute carrier family 35 member G1	protein_coding	-0.55	1.85	0.0376351	0.0176367	-0.44	0.0286638
C21orf91	ENSG00000154642	chromosome 21 open reading frame 91	protein_coding	-0.54	4	0.00226551	0.00210559	-0.53	0.00431149
IL27RA	ENSG00000104998	interleukin 27 receptor subunit alpha	protein_coding	-0.54	3.26	0.0269119	0.00342614	-0.46	0.0176326
FEZ2	ENSG00000171055	fasciculation and elongation protein zeta 2	protein_coding	-0.54	5.2	0.00491038	0.00342614	-0.52	0.00477303
KLF11	ENSG00000172059	Kruppel like factor 11	protein_coding	-0.53	4.61	0.0439684	0.0107531	-0.38	0.0768595
SEPTIN7	ENSG00000122545	septin 7	protein_coding	-0.53	7.03	0.00157346	0.00210559	-0.58	0.00125093
RSU1	ENSG00000148484	Ras suppressor protein 1	protein_coding	-0.53	6.03	0.00195579	0.00101768	-0.55	0.00283429
PELI2	ENSG00000139946	pellino E3 ubiquitin protein ligase family member 2	protein_coding	-0.53	4.16	0.011709	0.0107531	-0.52	0.00584249
ATG5	ENSG00000057663	autophagy related 5	protein_coding	-0.53	5.44	0.0116641	0.0421612	-0.43	0.0335038
RPS6KA5	ENSG00000100784	ribosomal protein S6 kinase A5	protein_coding	-0.52	4	0.0138472	0.00720585	-0.53	0.00431149
SOWAHC	ENSG00000198142	sosondowah ankyrin repeat domain family member C	protein_coding	-0.52	4.86	0.00770713	0.0122064	-0.52	0.00477303
NOL4L	ENSG00000197183	nucleolar protein 4 like	protein_coding	-0.52	4.7	0.00280167	0.00342614	-0.56	0.00178661
MAPK7	ENSG00000166484	mitogen-activated protein kinase 7	protein_coding	-0.51	4.19	0.00167957	0.00210559	-0.57	0.00140874
DNAJB6	ENSG00000105993	DnaJ heat shock protein family (Hsp40) member B6	protein_coding	-0.5	6.08	0.00164588	0.00249166	-0.63	0.000251428
PHACTR2	ENSG00000112419	phosphatase and actin regulator 2	protein_coding	-0.49	5.8	0.0334107	0.0343796	-0.34	0.130818
CDKN2AIP	ENSG00000168564	CDKN2A interacting protein	protein_coding	-0.48	4.71	0.00300577	0.00210559	-0.6	0.000658982
LRRCC1	ENSG00000133739	leucine rich repeat and coiled-coil centrosomal protein 1	protein_coding	-0.48	3.9	0.0368025	0.0222625	-0.38	0.07264
CHURC1	ENSG00000258289	churchill domain containing 1	protein_coding	-0.48	5.65	0.0114904	0.000346309	-0.47	0.0161847
DENND5A	ENSG00000184014	DENN domain containing 5A	protein_coding	-0.48	6.11	0.00611258	0.0157167	-0.49	0.0113268
LZTFL1	ENSG00000163818	leucine zipper transcription factor like 1	protein_coding	-0.47	4.46	0.00306513	0.000829385	-0.55	0.00283429
RAP1B	ENSG00000127314	RAP1B, member of RAS oncogene family	protein_coding	-0.47	5.21	0.00274393	0.00466188	-0.51	0.00708093
EXT1	ENSG00000182197	exostosin glycosyltransferase 1	protein_coding	-0.45	5.44	0.00435201	0.00828562	-0.54	0.00352187
YAF2	ENSG00000015153	YY1 associated factor 2	protein_coding	-0.45	3.88	0.00332678	0.000684911	-0.58	0.00125093
CCDC50	ENSG00000152492	coiled-coil domain containing 50	protein_coding	-0.44	6.38	0.00987612	0.0107531	-0.53	0.00389508
OSTM1	ENSG00000081087	osteoclastogenesis associated transmembrane protein 1	protein_coding	-0.43	5.24	0.0164191	0.00828562	-0.51	0.00642892
KLHL21	ENSG00000162413	kelch like family member 21	protein_coding	-0.42	6.39	0.0218115	0.0198496	-0.48	0.0124192
WDR44	ENSG00000131725	WD repeat domain 44	protein_coding	-0.42	4.44	0.0402249	0.00943724	-0.38	0.07264
TMEM106B	ENSG00000106460	transmembrane protein 106B	protein_coding	-0.42	6.79	0.0439684	0.0107531	-0.4	0.0555328
ZSCAN18	ENSG00000121413	zinc finger and SCAN domain containing 18	protein_coding	-0.42	5.64	0.000754195	0.000114847	-0.66	7.44181e-05
WDR82	ENSG00000164091	WD repeat domain 82	protein_coding	-0.41	7.19	0.00151984	0.000829385	-0.63	0.000217888
ABTB1	ENSG00000114626	ankyrin repeat and BTB domain containing 1	protein_coding	-0.41	4.79	0.0181653	0.000551112	-0.45	0.0208349
DENND6A	ENSG00000174839	DENN domain containing 6A	protein_coding	-0.41	4.85	0.00430015	0.000346309	-0.58	0.00125093
BBS2	ENSG00000125124	Bardet-Biedl syndrome 2	protein_coding	-0.41	5.49	0.0166896	0.000202437	-0.54	0.00352187
TCF7L2	ENSG00000148737	transcription factor 7 like 2	protein_coding	-0.4	5.13	0.0220312	0.0310182	-0.39	0.0636183
RIT1	ENSG00000143622	Ras like without CAAX 1	protein_coding	-0.4	4.63	0.00251679	0.00210559	-0.64	0.000188327
SP100	ENSG00000067066	SP100 nuclear antigen	protein_coding	-0.39	5.76	0.00438201	0.000829385	-0.58	0.000970096
MAPRE1	ENSG00000101367	microtubule associated protein RP/EB family member 1	protein_coding	-0.39	7.04	0.00836093	0.00828562	-0.52	0.00527351
KCTD6	ENSG00000168301	potassium channel tetramerization domain containing 6	protein_coding	-0.39	2.81	0.0170494	0.0176367	-0.47	0.0148392
TOMM40L	ENSG00000158882	translocase of outer mitochondrial membrane 40 like	protein_coding	-0.39	3.83	0.0131056	0.00943724	-0.51	0.00708093
PCGF6	ENSG00000156374	polycomb group ring finger 6	protein_coding	-0.38	2.63	0.0335045	0.00466188	-0.47	0.0161847
TRAPPC6B	ENSG00000182400	trafficking protein particle complex 6B	protein_coding	-0.38	4.84	0.00193732	0.000202437	-0.66	7.44181e-05
KLHL2	ENSG00000109466	kelch like family member 2	protein_coding	-0.38	4.11	0.0402776	0.00292962	-0.44	0.0264368
B3GLCT	ENSG00000187676	beta 3-glucosyltransferase	protein_coding	-0.38	3.48	0.0227027	0.0176367	-0.56	0.00178661
PTEN	ENSG00000171862	phosphatase and tensin homolog	protein_coding	-0.37	6.88	0.0344582	0.0107531	-0.39	0.0636183
TMEM231	ENSG00000205084	transmembrane protein 231	protein_coding	-0.37	3.86	0.0298052	0.00943724	-0.5	0.00781458
SPIN1	ENSG00000106723	spindlin 1	protein_coding	-0.36	6.95	0.00359421	0.000161482	-0.62	0.000290506
C22orf39	ENSG00000242259	chromosome 22 open reading frame 39	protein_coding	-0.36	5.16	0.0436843	0.0157167	-0.37	0.0871232
MAP4K5	ENSG00000012983	mitogen-activated protein kinase kinase kinase kinase 5	protein_coding	-0.36	5.44	0.0157223	0.00342614	-0.46	0.0192099
RAP2C	ENSG00000123728	RAP2C, member of RAS oncogene family	protein_coding	-0.35	4.48	0.0180766	0.0198496	-0.48	0.0135942
KDSR	ENSG00000119537	3-ketodihydrosphingosine reductase	protein_coding	-0.35	6.13	0.00648369	0.000684911	-0.61	0.000440939
SQSTM1	ENSG00000161011	sequestosome 1	protein_coding	-0.35	8.02	0.0407278	0.00537948	-0.47	0.0161847
SMIM12	ENSG00000163866	small integral membrane protein 12	protein_coding	-0.35	4.34	0.0220242	0.00342614	-0.46	0.0176326
PRMT2	ENSG00000160310	protein arginine methyltransferase 2	protein_coding	-0.35	6.53	0.00916759	0.0198496	-0.52	0.00584249
KIZ	ENSG00000088970	kizuna centrosomal protein	protein_coding	-0.35	4.55	0.0173719	0.00292962	-0.42	0.0361563
PIBF1	ENSG00000083535	progesterone immunomodulatory binding factor 1	protein_coding	-0.32	4.37	0.0330237	0.00249166	-0.46	0.0176326
OSBPL1A	ENSG00000141447	oxysterol binding protein like 1A	protein_coding	-0.31	5.72	0.0478635	0.0310182	-0.39	0.0636183
DDX24	ENSG00000089737	DEAD-box helicase 24	protein_coding	-0.3	7.67	0.0368664	0.0222625	-0.41	0.0481509
NRBP1	ENSG00000115216	nuclear receptor binding protein 1	protein_coding	-0.28	6.68	0.0170316	0.00537948	-0.52	0.00527351
FBXW7	ENSG00000109670	F-box and WD repeat domain containing 7	protein_coding	-0.28	4.07	0.0499914	0.00398843	-0.47	0.0148392
AHI1	ENSG00000135541	Abelson helper integration site 1	protein_coding	-0.27	4.58	0.0475643	0.0176367	-0.47	0.0161847
BAP1	ENSG00000163930	BRCA1 associated protein 1	protein_coding	0.24	6.44	0.0418989	0.0138685	0.49	0.0103209
NOL10	ENSG00000115761	nucleolar protein 10	protein_coding	0.25	4.99	0.017108	0.000829385	0.6	0.000658982
ELMO2	ENSG00000062598	engulfment and cell motility 2	protein_coding	0.27	6.24	0.047031	0.0157167	0.44	0.0264368
SFPQ	ENSG00000116560	splicing factor proline and glutamine rich	protein_coding	0.27	7.85	0.0406731	0.00466188	0.45	0.0226107
CELF1	ENSG00000149187	CUGBP Elav-like family member 1	protein_coding	0.28	6.81	0.0354342	0.0122064	0.52	0.00584249
EXD2	ENSG00000081177	exonuclease 3'-5' domain containing 2	protein_coding	0.28	5.59	0.0255172	0.00292962	0.55	0.00283429
ATPAF1	ENSG00000123472	ATP synthase mitochondrial F1 complex assembly factor 1	protein_coding	0.28	6.04	0.0226055	0.00828562	0.48	0.0135942
PIGV	ENSG00000060642	phosphatidylinositol glycan anchor biosynthesis class V	protein_coding	0.28	5.01	0.0410366	0.0107531	0.45	0.0226107
FBXW2	ENSG00000119402	F-box and WD repeat domain containing 2	protein_coding	0.29	6.33	0.0397788	0.00123271	0.45	0.0226107
RANBP9	ENSG00000010017	RAN binding protein 9	protein_coding	0.3	5.83	0.0176149	0.00123271	0.49	0.0103209
UBA6	ENSG00000033178	ubiquitin like modifier activating enzyme 6	protein_coding	0.3	5.48	0.0496115	0.00828562	0.42	0.0389042
CARNMT1	ENSG00000156017	carnosine N-methyltransferase 1	protein_coding	0.3	4.45	0.0395706	0.00398843	0.59	0.000751544
DAP3	ENSG00000132676	death associated protein 3	protein_coding	0.31	6.52	0.017379	0.0157167	0.56	0.00201302
BSDC1	ENSG00000160058	BSD domain containing 1	protein_coding	0.31	7	0.00380637	0.000202437	0.66	8.72349e-05
SVIP	ENSG00000198168	small VCP interacting protein	protein_coding	0.31	5.92	0.0476957	0.00943724	0.39	0.0636183
SERBP1	ENSG00000142864	SERPINE1 mRNA binding protein 1	protein_coding	0.32	8.08	0.00443669	0.000684911	0.59	0.000853427
PIAS2	ENSG00000078043	protein inhibitor of activated STAT 2	protein_coding	0.32	5.3	0.0179245	0.0222625	0.52	0.00527351
TOMM20	ENSG00000173726	translocase of outer mitochondrial membrane 20	protein_coding	0.32	8.09	0.0155791	0.00178359	0.5	0.00781458
TMEM129	ENSG00000168936	transmembrane protein 129, E3 ubiquitin ligase	protein_coding	0.32	6.37	0.0496075	0.0138685	0.47	0.0148392
ZNF227	ENSG00000131115	zinc finger protein 227	protein_coding	0.32	3.98	0.0347307	0.0122064	0.51	0.00708093
YES1	ENSG00000176105	YES proto-oncogene 1, Src family tyrosine kinase	protein_coding	0.33	5.98	0.0145499	0.00292962	0.51	0.00708093
LARP4B	ENSG00000107929	La ribonucleoprotein 4B	protein_coding	0.34	6.59	0.00953545	0.00249166	0.57	0.00158563
FBXO42	ENSG00000037637	F-box protein 42	protein_coding	0.34	5.77	0.00439388	0.00828562	0.58	0.00125093
RAN	ENSG00000132341	RAN, member RAS oncogene family	protein_coding	0.35	7.36	0.0323161	0.0278207	0.47	0.0148392
ASB13	ENSG00000196372	ankyrin repeat and SOCS box containing 13	protein_coding	0.35	4.78	0.0376814	0.0381054	0.34	0.130818
EIF2A	ENSG00000144895	eukaryotic translation initiation factor 2A	protein_coding	0.35	6.84	0.00393676	0.00466188	0.62	0.000290506
ANGEL1	ENSG00000013523	angel homolog 1	protein_coding	0.35	4.72	0.0198575	0.00249166	0.52	0.00477303
ZNF75A	ENSG00000162086	zinc finger protein 75a	protein_coding	0.35	4.54	0.0143528	0.00537948	0.54	0.00352187
MKNK2	ENSG00000099875	MAPK interacting serine/threonine kinase 2	protein_coding	0.36	7.9	0.0253909	0.0138685	0.51	0.00642892
CAB39	ENSG00000135932	calcium binding protein 39	protein_coding	0.36	7.1	0.0389952	0.046735	0.41	0.0481509
HSPA9	ENSG00000113013	heat shock protein family A (Hsp70) member 9	protein_coding	0.36	8.09	0.00522548	0.000829385	0.61	0.000440939
SURF4	ENSG00000148248	surfeit 4	protein_coding	0.36	8.46	0.00782019	0.00149145	0.53	0.00431149
AAAS	ENSG00000094914	aladin WD repeat nucleoporin	protein_coding	0.36	5.3	0.0125471	0.00249166	0.51	0.00642892
TRIM33	ENSG00000197323	tripartite motif containing 33	protein_coding	0.36	6.16	0.0266127	0.00828562	0.39	0.0636183
GPHN	ENSG00000171723	gephyrin	protein_coding	0.36	4.82	0.00928221	0.00101768	0.53	0.00389508
DTD1	ENSG00000125821	D-aminoacyl-tRNA deacylase 1	protein_coding	0.37	4.83	0.0110704	0.0122064	0.57	0.00158563
IARS2	ENSG00000067704	isoleucyl-tRNA synthetase 2, mitochondrial	protein_coding	0.37	6.95	0.0367583	0.0107531	0.55	0.00253493
MARCHF6	ENSG00000145495	membrane associated ring-CH-type finger 6	protein_coding	0.37	7.29	0.00988308	0.00210559	0.45	0.0245123
EIF4B	ENSG00000063046	eukaryotic translation initiation factor 4B	protein_coding	0.38	8.86	0.00275749	0.00178359	0.6	0.000658982
SCP2	ENSG00000116171	sterol carrier protein 2	protein_coding	0.38	7.74	0.0177725	0.0107531	0.43	0.0335038
SRP72	ENSG00000174780	signal recognition particle 72	protein_coding	0.39	6.9	0.0278666	0.00178359	0.48	0.0135942
NIN	ENSG00000100503	ninein	protein_coding	0.4	5.6	0.040351	0.00342614	0.44	0.0286638
SLC11A2	ENSG00000110911	solute carrier family 11 member 2	protein_coding	0.4	6.57	0.0196655	0.0157167	0.46	0.0192099
STRN4	ENSG00000090372	striatin 4	protein_coding	0.4	6.74	0.00298856	0.000439058	0.58	0.000970096
MINDY3	ENSG00000148481	MINDY lysine 48 deubiquitinase 3	protein_coding	0.4	5.17	0.0145885	0.0122064	0.52	0.00584249
PDPK1	ENSG00000140992	3-phosphoinositide dependent protein kinase 1	protein_coding	0.42	5.41	0.029128	0.00537948	0.44	0.0264368
ARL6IP1	ENSG00000170540	ADP ribosylation factor like GTPase 6 interacting protein 1	protein_coding	0.42	7.4	0.017108	0.00828562	0.45	0.0226107
USP42	ENSG00000106346	ubiquitin specific peptidase 42	protein_coding	0.42	4.16	0.0265839	0.00249166	0.52	0.00477303
SUMF1	ENSG00000144455	sulfatase modifying factor 1	protein_coding	0.42	5.89	0.00575456	0.00178359	0.57	0.00158563
RNF24	ENSG00000101236	ring finger protein 24	protein_coding	0.43	5.63	0.00522548	0.0157167	0.54	0.00352187
GSE1	ENSG00000131149	Gse1 coiled-coil protein	protein_coding	0.43	6.71	0.024193	0.0343796	0.42	0.0361563
WDR37	ENSG00000047056	WD repeat domain 37	protein_coding	0.44	4.76	0.0152874	0.0138685	0.47	0.0148392
SPTLC2	ENSG00000100596	serine palmitoyltransferase long chain base subunit 2	protein_coding	0.45	6.45	0.0065696	0.000161482	0.49	0.0113268
ZNF721	ENSG00000182903	zinc finger protein 721	protein_coding	0.46	4.31	0.0014595	0.00149145	0.62	0.000290506
RNF103	ENSG00000239305	ring finger protein 103	protein_coding	0.46	6.28	0.000449767	0.00292962	0.67	5.31846e-05
ASPSCR1	ENSG00000169696	ASPSCR1 tether for SLC2A4, UBX domain containing	protein_coding	0.46	5.08	0.0408423	0.00943724	0.33	0.143362
MTHFD1	ENSG00000100714	methylenetetrahydrofolate dehydrogenase, cyclohydrolase and formyltetrahydrofolate synthetase 1	protein_coding	0.47	5.84	0.000206675	0.000114847	0.69	2.63586e-05
RPS6KA2	ENSG00000071242	ribosomal protein S6 kinase A2	protein_coding	0.47	6.58	0.0105951	0.00178359	0.51	0.00708093
GPATCH4	ENSG00000160818	G-patch domain containing 4	protein_coding	0.47	4.98	0.00137115	0.00149145	0.62	0.000385369
CAB39L	ENSG00000102547	calcium binding protein 39 like	protein_coding	0.47	7.09	0.00610193	0.0176367	0.44	0.0264368
CCDC85C	ENSG00000205476	coiled-coil domain containing 85C	protein_coding	0.47	5.88	0.0128436	0.000829385	0.48	0.0124192
POM121C	ENSG00000272391	POM121 transmembrane nucleoporin C	protein_coding	0.47	5.35	0.00397983	0.000202437	0.6	0.000658982
TM9SF1	ENSG00000100926	transmembrane 9 superfamily member 1	protein_coding	0.48	3.43	0.0049831	0.00101768	0.62	0.000336341
XKR6	ENSG00000171044	XK related 6	protein_coding	0.48	1.31	0.043297	0.046735	0.38	0.07264
MAP4K4	ENSG00000071054	mitogen-activated protein kinase kinase kinase kinase 4	protein_coding	0.48	6.18	0.0089976	0.00123271	0.51	0.00642892
YOD1	ENSG00000180667	YOD1 deubiquitinase	protein_coding	0.49	3.57	0.00367862	0.000346309	0.59	0.000853427
SECISBP2L	ENSG00000138593	SECIS binding protein 2 like	protein_coding	0.5	6.84	0.0155085	0.0343796	0.39	0.0636183
HLTF	ENSG00000071794	helicase like transcription factor	protein_coding	0.5	5.88	0.0133899	0.000275416	0.44	0.0264368
NDC1	ENSG00000058804	NDC1 transmembrane nucleoporin	protein_coding	0.5	4.52	0.00446916	0.00123271	0.56	0.00178661
TMEM87B	ENSG00000153214	transmembrane protein 87B	protein_coding	0.5	6.98	0.015297	0.00398843	0.51	0.00642892
ARF6	ENSG00000165527	ADP ribosylation factor 6	protein_coding	0.51	7.49	0.00017386	0.000346309	0.66	8.72349e-05
ASNS	ENSG00000070669	asparagine synthetase (glutamine-hydrolyzing)	protein_coding	0.51	4.63	0.0074556	0.046735	0.46	0.0192099
SPATA2	ENSG00000158480	spermatogenesis associated 2	protein_coding	0.51	4.85	0.000914021	0.00210559	0.6	0.000658982
LRRC59	ENSG00000108829	leucine rich repeat containing 59	protein_coding	0.51	7.36	0.00390254	0.00466188	0.61	0.000506304
RERE	ENSG00000142599	arginine-glutamic acid dipeptide repeats	protein_coding	0.52	8.52	0.00143963	0.00210559	0.61	0.000506304
TAF1D	ENSG00000166012	TATA-box binding protein associated factor, RNA polymerase I subunit D	protein_coding	0.53	5.24	0.00069712	0.000684911	0.61	0.000440939
CPT2	ENSG00000157184	carnitine palmitoyltransferase 2	protein_coding	0.53	5.24	0.00214347	0.00623949	0.54	0.00352187
IPPK	ENSG00000127080	inositol-pentakisphosphate 2-kinase	protein_coding	0.53	2.25	0.045707	0.00123271	0.49	0.00942878
RNLS	ENSG00000184719	renalase, FAD dependent amine oxidase	protein_coding	0.53	3.87	0.00408372	0.000202437	0.56	0.00178661
SCAMP4	ENSG00000227500	secretory carrier membrane protein 4	protein_coding	0.53	7.05	0.000758478	0.00149145	0.6	0.000658982
CEP83	ENSG00000173588	centrosomal protein 83	protein_coding	0.53	3	0.00190513	0.00249166	0.61	0.000440939
CKAP2	ENSG00000136108	cytoskeleton associated protein 2	protein_coding	0.54	3.8	0.0435352	0.0157167	0.39	0.0680532
ATP6V1E2	ENSG00000250565	ATPase H+ transporting V1 subunit E2	protein_coding	0.54	3.49	0.00058067	0.000275416	0.67	5.31846e-05
EPN3	ENSG00000049283	epsin 3	protein_coding	0.54	6	0.0102036	0.00292962	0.54	0.00352187
PHF14	ENSG00000106443	PHD finger protein 14	protein_coding	0.55	5.51	0.000413028	0.000439058	0.69	2.19814e-05
TXNDC16	ENSG00000087301	thioredoxin domain containing 16	protein_coding	0.55	6.53	0.0286681	0.0107531	0.42	0.0389042
CNOT6	ENSG00000113300	CCR4-NOT transcription complex subunit 6	protein_coding	0.55	5.79	0.00061	0.000275416	0.63	0.000251428
CTH	ENSG00000116761	cystathionine gamma-lyase	protein_coding	0.55	3.25	0.023369	0.00537948	0.48	0.0124192
CLPB	ENSG00000162129	caseinolytic mitochondrial matrix peptidase chaperone subunit B	protein_coding	0.56	3.83	0.00543254	0.00537948	0.49	0.0103209
PDCD11	ENSG00000148843	programmed cell death 11	protein_coding	0.56	5.62	0.000324539	0.00101768	0.61	0.000506304
SLC35F5	ENSG00000115084	solute carrier family 35 member F5	protein_coding	0.56	6.1	0.00445306	0.00828562	0.54	0.00316034
MRPL15	ENSG00000137547	mitochondrial ribosomal protein L15	protein_coding	0.56	4.9	0.000764819	0.00292962	0.67	6.29447e-05
SDSL	ENSG00000139410	serine dehydratase like	protein_coding	0.56	4.27	0.00614773	0.00292962	0.48	0.0124192
ARHGDIA	ENSG00000141522	Rho GDP dissociation inhibitor alpha	protein_coding	0.57	7.96	5.76542e-05	0.000114847	0.71	1.24515e-05
NFXL1	ENSG00000170448	nuclear transcription factor, X-box binding like 1	protein_coding	0.57	4.01	0.00913535	0.00123271	0.5	0.00781458
SETD7	ENSG00000145391	SET domain containing 7, histone lysine methyltransferase	protein_coding	0.58	7.79	0.0167063	0.000275416	0.49	0.0113268
SGO2	ENSG00000163535	shugoshin 2	protein_coding	0.58	1.73	0.0493768	0.00398843	0.45	0.0226107
MALT1	ENSG00000172175	MALT1 paracaspase	protein_coding	0.59	6.21	0.0285258	0.0310182	0.29	0.232657
CYFIP2	ENSG00000055163	cytoplasmic FMR1 interacting protein 2	protein_coding	0.59	5.45	0.00235212	0.00342614	0.64	0.000188327
RRP1	ENSG00000160214	ribosomal RNA processing 1	protein_coding	0.59	4.84	0.000142541	0.000114847	0.66	7.44181e-05
PARP8	ENSG00000151883	poly(ADP-ribose) polymerase family member 8	protein_coding	0.6	5.39	0.00921691	0.000439058	0.53	0.00431149
ADAM9	ENSG00000168615	ADAM metallopeptidase domain 9	protein_coding	0.6	7.42	0.0362178	0.00623949	0.48	0.0124192
COBLL1	ENSG00000082438	cordon-bleu WH2 repeat protein like 1	protein_coding	0.6	6.99	0.0166416	0.0198496	0.51	0.00642892
P4HA1	ENSG00000122884	prolyl 4-hydroxylase subunit alpha 1	protein_coding	0.61	5.62	8.02261e-05	0.000114847	0.71	8.43322e-06
KDELR2	ENSG00000136240	KDEL endoplasmic reticulum protein retention receptor 2	protein_coding	0.61	8.67	2.93298e-05	0.000202437	0.72	5.66486e-06
GCAT	ENSG00000100116	glycine C-acetyltransferase	protein_coding	0.62	5.79	0.0197559	0.0278207	0.44	0.0264368
ANKRD52	ENSG00000139645	ankyrin repeat domain 52	protein_coding	0.63	6.14	0.0029141	0.000439058	0.54	0.00316034
CPD	ENSG00000108582	carboxypeptidase D	protein_coding	0.63	7.52	0.00271	0.00178359	0.52	0.00584249
PRRC2A	ENSG00000204469	proline rich coiled-coil 2A	protein_coding	0.63	8.86	5.17989e-05	0.000161482	0.76	8.33232e-07
CCDC15	ENSG00000149548	coiled-coil domain containing 15	protein_coding	0.63	1.91	0.00367062	0.00466188	0.57	0.00140874
PRRT3	ENSG00000163704	proline rich transmembrane protein 3	protein_coding	0.63	3.69	0.0148707	0.0176367	0.42	0.0416591
MPI	ENSG00000178802	mannose phosphate isomerase	protein_coding	0.64	6.17	6.84992e-06	0.000114847	0.79	1.97784e-07
PM20D2	ENSG00000146281	peptidase M20 domain containing 2	protein_coding	0.64	6.65	0.0221049	0.0222625	0.44	0.0264368
TONSL	ENSG00000160949	tonsoku like, DNA repair protein	protein_coding	0.64	3.26	0.00135911	0.00249166	0.62	0.000385369
AK4	ENSG00000162433	adenylate kinase 4	protein_coding	0.65	6.42	0.0333343	0.00720585	0.42	0.0389042
RNF144A	ENSG00000151692	ring finger protein 144A	protein_coding	0.66	5.53	0.00803174	0.00720585	0.57	0.00140874
ALG8	ENSG00000159063	ALG8 alpha-1,3-glucosyltransferase	protein_coding	0.66	5.39	0.000154657	0.00178359	0.66	7.44181e-05
XPOT	ENSG00000184575	exportin for tRNA	protein_coding	0.67	6.63	1.15573e-05	0.000161482	0.73	4.62163e-06
TRIQK	ENSG00000205133	triple QxxK/R motif containing	protein_coding	0.67	5.91	0.000138703	0.000439058	0.68	3.16136e-05
TACSTD2	ENSG00000184292	tumor associated calcium signal transducer 2	protein_coding	0.68	8.92	0.00442554	0.00123271	0.55	0.00283429
CYP39A1	ENSG00000146233	cytochrome P450 family 39 subfamily A member 1	protein_coding	0.68	5.11	0.0442953	0.00828562	0.46	0.0176326
SYVN1	ENSG00000162298	synoviolin 1	protein_coding	0.68	7.05	0.000380156	0.00398843	0.66	7.44181e-05
MARVELD2	ENSG00000152939	MARVEL domain containing 2	protein_coding	0.68	5.14	0.000641933	0.00101768	0.58	0.00110189
CHD1L	ENSG00000131778	chromodomain helicase DNA binding protein 1 like	protein_coding	0.68	5.4	0.00020708	0.000439058	0.64	0.000188327
FKBP5	ENSG00000096060	FKBP prolyl isomerase 5	protein_coding	0.69	8.46	0.0383931	0.0248585	0.36	0.104509
PABPC1	ENSG00000070756	poly(A) binding protein cytoplasmic 1	protein_coding	0.69	10.48	0.000119013	0.00149145	0.67	5.31846e-05
SCARB2	ENSG00000138760	scavenger receptor class B member 2	protein_coding	0.69	9.12	3.96404e-05	0.000114847	0.72	5.66486e-06
EIF2AK3	ENSG00000172071	eukaryotic translation initiation factor 2 alpha kinase 3	protein_coding	0.69	5.73	0.00040967	0.000551112	0.63	0.000217888
CTU1	ENSG00000142544	cytosolic thiouridylase subunit 1	protein_coding	0.69	1.47	0.00395733	0.00210559	0.59	0.000751544
MYO19	ENSG00000278259	myosin XIX	protein_coding	0.69	4.33	0.000394059	0.00149145	0.65	0.000119183
AGPAT3	ENSG00000160216	1-acylglycerol-3-phosphate O-acyltransferase 3	protein_coding	0.7	6.81	2.92766e-05	0.000684911	0.75	1.31492e-06
SHTN1	ENSG00000187164	shootin 1	protein_coding	0.7	5.85	0.00451755	0.000275416	0.56	0.00178661
CCDC186	ENSG00000165813	coiled-coil domain containing 186	protein_coding	0.7	6.42	0.00508804	0.00466188	0.47	0.0161847
YBEY	ENSG00000182362	ybeY metalloendoribonuclease	protein_coding	0.71	3.79	0.000132932	0.000114847	0.69	2.63586e-05
TCEA3	ENSG00000204219	transcription elongation factor A3	protein_coding	0.72	6.93	2.6972e-05	0.000275416	0.69	2.63586e-05
DEGS1	ENSG00000143753	delta 4-desaturase, sphingolipid 1	protein_coding	0.72	7.47	0.00442554	0.0138685	0.48	0.0135942
SLC19A2	ENSG00000117479	solute carrier family 19 member 2	protein_coding	0.72	4.63	0.0168967	0.0198496	0.39	0.0594249
TBL1XR1	ENSG00000177565	TBL1X receptor 1	protein_coding	0.72	7.73	0.000214028	0.000275416	0.65	0.000139193
TIFA	ENSG00000145365	TRAF interacting protein with forkhead associated domain	protein_coding	0.72	4.34	0.00126161	0.00537948	0.55	0.00283429
CENPE	ENSG00000138778	centromere protein E	protein_coding	0.73	1.43	0.02293	0.0198496	0.37	0.0817378
ARID3A	ENSG00000116017	AT-rich interaction domain 3A	protein_coding	0.73	3.08	0.00264746	0.00178359	0.58	0.00110189
ABCC1	ENSG00000103222	ATP binding cassette subfamily C member 1	protein_coding	0.73	6.83	0.000809417	0.000202437	0.62	0.000336341
KDM7A	ENSG00000006459	lysine demethylase 7A	protein_coding	0.73	5.06	0.000509652	0.000829385	0.58	0.000970096
UHRF1BP1	ENSG00000065060	UHRF1 binding protein 1	protein_coding	0.75	5.11	0.00114985	0.000114847	0.51	0.00708093
LCP1	ENSG00000136167	lymphocyte cytosolic protein 1	protein_coding	0.75	8.83	0.037377	0.00623949	0.54	0.00352187
GPR89B	ENSG00000188092	G protein-coupled receptor 89B	protein_coding	0.75	1.69	0.000543249	0.00149145	0.67	6.29447e-05
CRYBG1	ENSG00000112297	crystallin beta-gamma domain containing 1	protein_coding	0.75	7.6	0.0289903	0.0222625	0.46	0.0192099
WASF3	ENSG00000132970	WASP family member 3	protein_coding	0.77	5.39	0.00058067	0.00210559	0.63	0.000251428
MYO5C	ENSG00000128833	myosin VC	protein_coding	0.77	6.32	0.00041037	0.00149145	0.61	0.000440939
SOAT1	ENSG00000057252	sterol O-acyltransferase 1	protein_coding	0.78	7.31	0.00100838	0.000275416	0.59	0.000853427
DTX3L	ENSG00000163840	deltex E3 ubiquitin ligase 3L	protein_coding	0.78	6.39	5.49526e-05	0.000161482	0.71	8.43322e-06
ZNF239	ENSG00000196793	zinc finger protein 239	protein_coding	0.78	2.89	0.000651814	0.00342614	0.63	0.000251428
CLCF1	ENSG00000175505	cardiotrophin like cytokine factor 1	protein_coding	0.78	2.34	0.0274999	0.0157167	0.52	0.00477303
B3GAT3	ENSG00000149541	beta-1,3-glucuronyltransferase 3	protein_coding	0.78	5.97	0.000651408	0.000275416	0.56	0.00178661
PTPN13	ENSG00000163629	protein tyrosine phosphatase non-receptor type 13	protein_coding	0.79	6.75	0.00511491	0.000551112	0.52	0.00584249
EPHB3	ENSG00000182580	EPH receptor B3	protein_coding	0.79	5.36	0.0214265	0.0310182	0.49	0.0103209
MARCHF3	ENSG00000173926	membrane associated ring-CH-type finger 3	protein_coding	0.79	1.42	0.00955062	0.0138685	0.62	0.000385369
ACSL3	ENSG00000123983	acyl-CoA synthetase long chain family member 3	protein_coding	0.8	8.2	0.00189818	0.000551112	0.52	0.00477303
MAP7	ENSG00000135525	microtubule associated protein 7	protein_coding	0.8	6.65	0.000114095	0.000551112	0.72	6.9242e-06
LRP11	ENSG00000120256	LDL receptor related protein 11	protein_coding	0.81	6.53	5.87425e-05	0.000551112	0.69	2.19814e-05
GSTZ1	ENSG00000100577	glutathione S-transferase zeta 1	protein_coding	0.82	5.59	0.000374285	0.000439058	0.63	0.000251428
FAM72A	ENSG00000196550	family with sequence similarity 72 member A	protein_coding	0.83	-2.49	0.0111244	0.00943724	0.5	0.00859453
PMM2	ENSG00000140650	phosphomannomutase 2	protein_coding	0.84	3.79	5.99157e-05	0.000114847	0.63	0.000217888
PNPLA7	ENSG00000130653	patatin like phospholipase domain containing 7	protein_coding	0.84	6.21	0.0173395	0.0176367	0.49	0.0113268
ATP11B	ENSG00000058063	ATPase phospholipid transporting 11B (putative)	protein_coding	0.85	7.12	0.000754349	0.000551112	0.59	0.000853427
LRRC8B	ENSG00000197147	leucine rich repeat containing 8 VRAC subunit B	protein_coding	0.85	5.12	0.000303059	0.000439058	0.71	8.43322e-06
CENPO	ENSG00000138092	centromere protein O	protein_coding	0.85	2.72	9.45811e-06	0.000114847	0.73	3.7856e-06
LMO7	ENSG00000136153	LIM domain 7	protein_coding	0.86	6.63	0.00262857	0.00720585	0.5	0.00859453
ECI2	ENSG00000198721	enoyl-CoA delta isomerase 2	protein_coding	0.86	6.29	5.80517e-05	0.000829385	0.67	6.29447e-05
AVL9	ENSG00000105778	AVL9 cell migration associated	protein_coding	0.86	6.17	9.04696e-06	0.000114847	0.73	3.7856e-06
STYK1	ENSG00000060140	serine/threonine/tyrosine kinase 1	protein_coding	0.88	4.71	0.00752909	0.00178359	0.58	0.00125093
ITPR2	ENSG00000123104	inositol 1,4,5-trisphosphate receptor type 2	protein_coding	0.89	6.1	0.0093309	0.00466188	0.46	0.0176326
XYLB	ENSG00000093217	xylulokinase	protein_coding	0.89	2.54	4.22235e-05	0.000161482	0.73	4.62163e-06
CYSRT1	ENSG00000197191	cysteine rich tail 1	protein_coding	0.89	0.95	0.0200411	0.0157167	0.36	0.104509
NRIP1	ENSG00000180530	nuclear receptor interacting protein 1	protein_coding	0.91	6.48	0.00176784	0.000439058	0.47	0.0148392
GGACT	ENSG00000134864	gamma-glutamylamine cyclotransferase	protein_coding	0.91	2.81	2.94305e-05	0.000202437	0.7	1.50087e-05
STK39	ENSG00000198648	serine/threonine kinase 39	protein_coding	0.92	6.69	0.000508195	0.000346309	0.62	0.000336341
SHCBP1	ENSG00000171241	SHC binding and spindle associated 1	protein_coding	0.93	0.06	0.00461941	0.00537948	0.56	0.00178661
MGST1	ENSG00000008394	microsomal glutathione S-transferase 1	protein_coding	0.94	7.2	0.0344582	0.0222625	0.47	0.0161847
CPEB3	ENSG00000107864	cytoplasmic polyadenylation element binding protein 3	protein_coding	0.94	4.96	0.000178708	0.00943724	0.51	0.00708093
ZNF680	ENSG00000173041	zinc finger protein 680	protein_coding	0.94	4.98	0.00582983	0.00466188	0.44	0.0264368
NLN	ENSG00000123213	neurolysin	protein_coding	0.95	4.79	7.9354e-05	0.000114847	0.71	1.24515e-05
PIK3AP1	ENSG00000155629	phosphoinositide-3-kinase adaptor protein 1	protein_coding	0.95	4.33	0.00090073	0.00292962	0.53	0.00431149
KIF11	ENSG00000138160	kinesin family member 11	protein_coding	0.96	2.53	0.000565523	0.00178359	0.54	0.00316034
PLEKHH1	ENSG00000054690	pleckstrin homology, MyTH4 and FERM domain containing H1	protein_coding	0.97	6.53	0.00248792	0.00828562	0.54	0.00352187
BCAM	ENSG00000187244	basal cell adhesion molecule (Lutheran blood group)	protein_coding	0.97	9.53	5.25509e-05	0.000161482	0.7	1.82219e-05
RHPN2	ENSG00000131941	rhophilin Rho GTPase binding protein 2	protein_coding	0.98	6.77	0.00843129	0.00537948	0.5	0.00859453
C1orf53	ENSG00000203724	chromosome 1 open reading frame 53	protein_coding	0.98	0.9	0.003163	0.0176367	0.55	0.00283429
BAIAP2L1	ENSG00000006453	BAR/IMD domain containing adaptor protein 2 like 1	protein_coding	0.98	6.64	0.000196289	0.000439058	0.7	1.82219e-05
CDK6	ENSG00000105810	cyclin dependent kinase 6	protein_coding	0.99	5.66	0.000485622	0.00342614	0.49	0.0113268
CDC25A	ENSG00000164045	cell division cycle 25A	protein_coding	0.99	1.89	9.35939e-06	0.000161482	0.75	1.62234e-06
IGFBP2	ENSG00000115457	insulin like growth factor binding protein 2	protein_coding	0.99	8.09	6.559e-05	0.00101768	0.63	0.000217888
FA2H	ENSG00000103089	fatty acid 2-hydroxylase	protein_coding	1	2.77	0.00203924	0.0138685	0.58	0.00125093
MGAT4A	ENSG00000071073	alpha-1,3-mannosyl-glycoprotein 4-beta-N-acetylglucosaminyltransferase A	protein_coding	1	5.84	5.286e-06	0.000551112	0.7	1.50087e-05
ESRP1	ENSG00000104413	epithelial splicing regulatory protein 1	protein_coding	1	6.62	5.38468e-06	0.000114847	0.75	1.31492e-06
MYC	ENSG00000136997	MYC proto-oncogene, bHLH transcription factor	protein_coding	1.01	6.66	0.0201793	0.0198496	0.61	0.000440939
HYOU1	ENSG00000149428	hypoxia up-regulated 1	protein_coding	1.01	8.28	1.84427e-05	0.000114847	0.68	3.16136e-05
RAB26	ENSG00000167964	RAB26, member RAS oncogene family	protein_coding	1.02	2.73	0.000451467	0.000829385	0.61	0.000440939
HLCS	ENSG00000159267	holocarboxylase synthetase	protein_coding	1.02	6.1	1.06504e-06	0.000114847	0.73	3.7856e-06
ZBTB42	ENSG00000179627	zinc finger and BTB domain containing 42	protein_coding	1.02	5.68	2.57436e-06	0.000275416	0.75	2.0088e-06
PLCB4	ENSG00000101333	phospholipase C beta 4	protein_coding	1.05	5.21	0.000152092	0.000114847	0.75	2.0088e-06
GNE	ENSG00000159921	glucosamine (UDP-N-acetyl)-2-epimerase/N-acetylmannosamine kinase	protein_coding	1.05	6.7	0.000741391	0.00123271	0.6	0.000658982
GLB1L2	ENSG00000149328	galactosidase beta 1 like 2	protein_coding	1.05	7.35	0.000347079	0.000346309	0.65	0.000139193
ALDH6A1	ENSG00000119711	aldehyde dehydrogenase 6 family member A1	protein_coding	1.06	7.27	5.62118e-06	0.000114847	0.73	3.7856e-06
ODC1	ENSG00000115758	ornithine decarboxylase 1	protein_coding	1.07	8.2	0.000920899	0.00828562	0.59	0.000751544
SLC9A2	ENSG00000115616	solute carrier family 9 member A2	protein_coding	1.07	5.35	0.0010389	0.000829385	0.61	0.000506304
COL28A1	ENSG00000215018	collagen type XXVIII alpha 1 chain	protein_coding	1.07	2.82	0.038748	0.046735	0.33	0.143362
PPM1H	ENSG00000111110	protein phosphatase, Mg2+/Mn2+ dependent 1H	protein_coding	1.08	7.18	1.08808e-05	0.000202437	0.73	3.7856e-06
NUAK2	ENSG00000163545	NUAK family kinase 2	protein_coding	1.09	3.16	0.000294101	0.00466188	0.49	0.0113268
TP53INP1	ENSG00000164938	tumor protein p53 inducible nuclear protein 1	protein_coding	1.1	6.9	6.00178e-06	0.000684911	0.7	1.82219e-05
ZNF217	ENSG00000171940	zinc finger protein 217	protein_coding	1.1	6.91	1.04218e-05	0.000161482	0.69	2.19814e-05
MYB	ENSG00000118513	MYB proto-oncogene, transcription factor	protein_coding	1.11	3.12	0.00151984	0.0176367	0.5	0.00781458
CCNG2	ENSG00000138764	cyclin G2	protein_coding	1.11	7.4	8.94036e-05	0.000439058	0.63	0.000217888
THRB	ENSG00000151090	thyroid hormone receptor beta	protein_coding	1.11	6	0.000866981	0.0176367	0.55	0.00253493
RHOU	ENSG00000116574	ras homolog family member U	protein_coding	1.11	7.28	0.00129681	0.0107531	0.48	0.0135942
CLGN	ENSG00000153132	calmegin	protein_coding	1.12	5.68	0.0109711	0.0248585	0.51	0.00642892
CHMP4C	ENSG00000164695	charged multivesicular body protein 4C	protein_coding	1.13	4.79	7.69287e-05	0.000161482	0.68	4.49206e-05
C1orf116	ENSG00000182795	chromosome 1 open reading frame 116	protein_coding	1.14	8.47	0.0054785	0.000275416	0.69	2.63586e-05
STRADB	ENSG00000082146	STE20 related adaptor beta	protein_coding	1.17	4.26	3.85418e-07	0.000114847	0.79	1.97784e-07
PMEPA1	ENSG00000124225	prostate transmembrane protein, androgen induced 1	protein_coding	1.18	9.72	0.00387808	0.000829385	0.67	6.29447e-05
GGCT	ENSG00000006625	gamma-glutamylcyclotransferase	protein_coding	1.18	5.44	1.18486e-05	0.000439058	0.73	3.7856e-06
PSAT1	ENSG00000135069	phosphoserine aminotransferase 1	protein_coding	1.19	5.09	0.000126188	0.000114847	0.67	5.31846e-05
SLC36A1	ENSG00000123643	solute carrier family 36 member 1	protein_coding	1.19	5.9	0.00201491	0.000551112	0.49	0.00942878
H4C8	ENSG00000158406	H4 clustered histone 8	protein_coding	1.19	2.56	0.00346888	0.00720585	0.54	0.00316034
PPP3CA	ENSG00000138814	protein phosphatase 3 catalytic subunit alpha	protein_coding	1.2	8.72	7.17261e-06	0.000202437	0.71	1.24515e-05
HIPK2	ENSG00000064393	homeodomain interacting protein kinase 2	protein_coding	1.22	7.84	1.20661e-05	0.000161482	0.68	3.76404e-05
ZNF697	ENSG00000143067	zinc finger protein 697	protein_coding	1.24	4.73	5.02304e-05	0.000551112	0.67	5.31846e-05
STEAP1	ENSG00000164647	STEAP family member 1	protein_coding	1.24	6.87	0.0123202	0.000829385	0.65	0.000119183
NECTIN3	ENSG00000177707	nectin cell adhesion molecule 3	protein_coding	1.25	5.21	0.00132583	0.00623949	0.55	0.00253493
INPP4B	ENSG00000109452	inositol polyphosphate-4-phosphatase type II B	protein_coding	1.29	5.51	0.000672385	0.00720585	0.52	0.00527351
GREB1	ENSG00000196208	growth regulating estrogen receptor binding 1	protein_coding	1.3	7.92	0.00494915	0.00398843	0.64	0.000188327
ZNF850	ENSG00000267041	zinc finger protein 850	protein_coding	1.31	2.43	2.22559e-07	0.000114847	0.84	9.48803e-09
NEDD4L	ENSG00000049759	NEDD4 like E3 ubiquitin protein ligase	protein_coding	1.32	8.62	6.58957e-06	0.000439058	0.67	5.31846e-05
ZNF652	ENSG00000198740	zinc finger protein 652	protein_coding	1.33	6.85	2.66912e-07	0.000346309	0.76	1.05578e-06
TECPR1	ENSG00000205356	tectonin beta-propeller repeat containing 1	protein_coding	1.33	6.36	3.5004e-08	0.000114847	0.78	2.50802e-07
ISX	ENSG00000175329	intestine specific homeobox	protein_coding	1.35	0.34	0.0165349	0.00249166	0.62	0.000290506
KLK4	ENSG00000167749	kallikrein related peptidase 4	protein_coding	1.35	9.69	0.00523208	0.000439058	0.73	4.62163e-06
SPDEF	ENSG00000124664	SAM pointed domain containing ETS transcription factor	protein_coding	1.36	9.32	0.0186515	0.000114847	0.78	4.08922e-07
C9orf152	ENSG00000188959	chromosome 9 open reading frame 152	protein_coding	1.39	6.05	2.27352e-06	0.000114847	0.8	1.17963e-07
EZH2	ENSG00000106462	enhancer of zeste 2 polycomb repressive complex 2 subunit	protein_coding	1.43	2.1	2.14462e-06	0.000114847	0.8	1.17963e-07
PLAC8L1	ENSG00000173261	PLAC8 like 1	protein_coding	1.44	-2.03	0.00860389	0.0381054	0.4	0.0517625
FMOD	ENSG00000122176	fibromodulin	protein_coding	1.5	8.11	0.000555788	0.00466188	0.6	0.000578472
FOXM1	ENSG00000111206	forkhead box M1	protein_coding	1.54	2.01	4.9208e-06	0.000114847	0.77	5.28648e-07
ELOVL7	ENSG00000164181	ELOVL fatty acid elongase 7	protein_coding	1.55	6.6	0.000286418	0.000114847	0.74	2.49306e-06
COLEC12	ENSG00000158270	collectin subfamily member 12	protein_coding	1.58	6.43	6.26897e-05	0.000275416	0.73	4.62163e-06
ASPM	ENSG00000066279	assembly factor for spindle microtubules	protein_coding	1.59	0.93	0.000405545	0.00210559	0.59	0.000853427
PLEKHS1	ENSG00000148735	pleckstrin homology domain containing S1	protein_coding	1.61	4.78	0.000569333	0.00342614	0.54	0.00316034
RELN	ENSG00000189056	reelin	protein_coding	1.66	3.8	0.000359124	0.0138685	0.57	0.00140874
HHLA2	ENSG00000114455	HERV-H LTR-associating 2	protein_coding	1.68	-1.74	0.00520014	0.0421612	0.37	0.0817378
CENPF	ENSG00000117724	centromere protein F	protein_coding	1.7	2.63	2.18288e-05	0.000829385	0.68	3.16136e-05
SLC27A2	ENSG00000140284	solute carrier family 27 member 2	protein_coding	1.71	4.11	5.59216e-06	0.000114847	0.75	2.0088e-06
H2AJ	ENSG00000246705	H2A,J histone	protein_coding	1.72	8.93	7.044e-05	0.00398843	0.6	0.000658982
FAM3B	ENSG00000183844	FAM3 metabolism regulating signaling molecule B	protein_coding	1.73	7.23	0.00032758	0.00537948	0.54	0.00352187
ALDH1A3	ENSG00000184254	aldehyde dehydrogenase 1 family member A3	protein_coding	1.75	8.96	2.19738e-05	0.000161482	0.75	1.62234e-06
ADM2	ENSG00000128165	adrenomedullin 2	protein_coding	1.76	5.19	2.01153e-06	0.000114847	0.78	2.50802e-07
PKIB	ENSG00000135549	cAMP-dependent protein kinase inhibitor beta	protein_coding	1.77	3.63	1.72887e-05	0.000346309	0.71	8.43322e-06
FMO5	ENSG00000131781	flavin containing dimethylaniline monoxygenase 5	protein_coding	1.8	4.78	2.21014e-05	0.000346309	0.67	6.29447e-05
POTEG	ENSG00000187537	POTE ankyrin domain family member G	protein_coding	1.81	1.25	0.0102565	0.00537948	0.41	0.0481509
TUBB2A	ENSG00000137267	tubulin beta 2A class IIa	protein_coding	1.83	5.15	8.48491e-06	0.000202437	0.7	1.50087e-05
FAM72D	ENSG00000215784	family with sequence similarity 72 member D	protein_coding	1.88	-3.19	0.00640317	0.00616515	0.5	0.00812552
TLCD1	ENSG00000160606	TLC domain containing 1	protein_coding	1.91	3.98	1.65251e-06	0.000114847	0.81	3.89567e-08
ABHD2	ENSG00000140526	abhydrolase domain containing 2, acylglycerol lipase	protein_coding	2.08	9.65	2.63582e-05	0.000202437	0.69	2.19814e-05
PCSK6	ENSG00000140479	proprotein convertase subtilisin/kexin type 6	protein_coding	2.1	3.82	2.10401e-06	0.000114847	0.74	3.09184e-06
MCCC2	ENSG00000131844	methylcrotonoyl-CoA carboxylase 2	protein_coding	2.11	8.88	4.55189e-07	0.000114847	0.81	6.7957e-08
SLC4A4	ENSG00000080493	solute carrier family 4 member 4	protein_coding	2.19	8.79	9.54004e-05	0.000114847	0.72	5.66486e-06
RET	ENSG00000165731	ret proto-oncogene	protein_coding	2.2	4.95	0.000417628	0.0278207	0.41	0.0481509
NETO2	ENSG00000171208	neuropilin and tolloid like 2	protein_coding	2.26	2.65	1.431e-09	0.000114847	0.85	4.2827e-09
SLC43A1	ENSG00000149150	solute carrier family 43 member 1	protein_coding	2.42	6.2	5.24691e-09	0.000161482	0.78	3.19515e-07
ONECUT2	ENSG00000119547	one cut homeobox 2	protein_coding	2.79	1.47	2.23752e-05	0.000114847	0.8	9.17524e-08
GDF15	ENSG00000130513	growth differentiation factor 15	protein_coding	2.96	9.04	1.09581e-05	0.000114847	0.74	2.49306e-06
RNF157	ENSG00000141576	ring finger protein 157	protein_coding	2.98	4.8	1.94231e-07	0.000202437	0.83	1.23181e-08
TGM3	ENSG00000125780	transglutaminase 3	protein_coding	3.32	3.6	3.09764e-05	0.000114847	0.75	1.31492e-06
KRT20	ENSG00000171431	keratin 20	protein_coding	3.36	-1.93	4.15557e-05	0.00943724	0.55	0.00271022
TBX10	ENSG00000167800	T-box transcription factor 10	protein_coding	3.39	0.47	0.00171787	0.00623949	0.58	0.00125093
UGT1A3	ENSG00000243135	UDP glucuronosyltransferase family 1 member A3	protein_coding	5.09	0.44	0.000182377	0.0335466	0.43	0.033165
