# Supplementary material for: miRNA Expression Patterns in Early- and Late-Stage Prostate Cancer Patients: High-Throughput Analysis
Source: Biomedicines. 2023 Nov 16;11(11):3073. doi: 10.3390/biomedicines11113073 (PMC10669269; doi:10.3390/biomedicines11113073)
Supplement: Supplementary file 1 [file biomedicines-11-03073-s001.zip › File S7_results_LPCa LAPCa.xlsx]

## Sheet: miR324_3p
Gene name	Gene id	Description	Biotype	LogFC	LogCPM	QLF_FDR	MW_FDR	Spearman_correlation_coef	Spearman_correlation_FDR
MFSD2A	ENSG00000168389	major facilitator superfamily domain containing 2A	protein_coding	-5.64	4.93	9.77761e-09	2.56593e-05	-0.51	4.9437e-05
STAC2	ENSG00000141750	SH3 and cysteine rich domain 2	protein_coding	-4.04	4.97	4.72497e-07	0.000767531	-0.42	0.00151033
PTGS1	ENSG00000095303	prostaglandin-endoperoxide synthase 1	protein_coding	-2.66	5.73	3.49994e-08	3.62569e-05	-0.64	6.88094e-08
KCNK10	ENSG00000100433	potassium two pore domain channel subfamily K member 10	protein_coding	-2	-1.62	0.000371867	0.0036266	-0.28	0.0606107
NELL2	ENSG00000184613	neural EGFL like 2	protein_coding	-1.82	5.13	0.000225191	0.00789261	-0.28	0.0714286
MYL9	ENSG00000101335	myosin light chain 9	protein_coding	-1.76	10.81	1.5951e-08	6.42498e-07	-0.67	8.34362e-09
ID4	ENSG00000172201	inhibitor of DNA binding 4, HLH protein	protein_coding	-1.71	5.41	3.84322e-09	4.13969e-08	-0.73	8.02385e-11
WNT2B	ENSG00000134245	Wnt family member 2B	protein_coding	-1.54	4.09	7.43556e-06	0.000142294	-0.49	0.000152188
PNMA2	ENSG00000240694	PNMA family member 2	protein_coding	-1.53	1.13	5.24131e-05	0.000223079	-0.42	0.00157495
CCN6	ENSG00000112761	cellular communication network factor 6	protein_coding	-1.47	-0.88	2.95141e-06	4.2983e-05	-0.61	4.51918e-07
FAM107A	ENSG00000168309	family with sequence similarity 107 member A	protein_coding	-1.42	6.36	2.64281e-07	3.49769e-07	-0.63	1.11848e-07
CHGB	ENSG00000089199	chromogranin B	protein_coding	-1.33	3.55	0.00543442	0.000223079	-0.5	7.69886e-05
CCND2	ENSG00000118971	cyclin D2	protein_coding	-1.26	6.39	1.82356e-06	1.60999e-06	-0.61	3.37147e-07
FBXL2	ENSG00000153558	F-box and leucine rich repeat protein 2	protein_coding	-1.14	2.63	1.461e-06	1.80784e-06	-0.62	2.11394e-07
PLCD3	ENSG00000161714	phospholipase C delta 3	protein_coding	-1.12	4.77	1.30212e-08	2.0163e-07	-0.67	5.44629e-09
HSPA4L	ENSG00000164070	heat shock protein family A (Hsp70) member 4 like	protein_coding	-1.11	3.87	2.14181e-07	5.78647e-06	-0.65	2.57881e-08
CNTN1	ENSG00000018236	contactin 1	protein_coding	-1.08	5.81	0.00217931	0.000178993	-0.4	0.0035599
FADS2	ENSG00000134824	fatty acid desaturase 2	protein_coding	-1.07	8.24	0.018747	0.0146191	-0.34	0.0181594
MAP3K20	ENSG00000091436	mitogen-activated protein kinase kinase kinase 20	protein_coding	-1.06	7.21	4.28509e-06	7.00418e-06	-0.55	1.01733e-05
STK26	ENSG00000134602	serine/threonine kinase 26	protein_coding	-1.06	5.18	5.07795e-08	9.10646e-07	-0.63	1.0308e-07
TENM3	ENSG00000218336	teneurin transmembrane protein 3	protein_coding	-1.04	4.04	0.000387733	0.000718092	-0.45	0.000566618
VAV3	ENSG00000134215	vav guanine nucleotide exchange factor 3	protein_coding	-1.02	3.46	6.56746e-05	8.23356e-05	-0.46	0.000449455
HECTD2	ENSG00000165338	HECT domain E3 ubiquitin protein ligase 2	protein_coding	-1.01	4.74	6.11936e-07	5.70751e-07	-0.58	1.60584e-06
NHLRC4	ENSG00000257108	NHL repeat containing 4	protein_coding	-0.99	1.24	0.00140087	0.00152142	-0.44	0.000895433
SV2A	ENSG00000159164	synaptic vesicle glycoprotein 2A	protein_coding	-0.99	2.96	1.27033e-05	2.53463e-06	-0.49	0.000137486
BDKRB2	ENSG00000168398	bradykinin receptor B2	protein_coding	-0.97	2.79	0.00225338	0.00193142	-0.32	0.0294044
COL6A1	ENSG00000142156	collagen type VI alpha 1 chain	protein_coding	-0.96	7.98	6.0263e-05	0.000871419	-0.44	0.00081789
NTN1	ENSG00000065320	netrin 1	protein_coding	-0.91	4.05	0.00164741	0.000550382	-0.44	0.000936608
KIF5A	ENSG00000155980	kinesin family member 5A	protein_coding	-0.88	0.16	0.00123153	0.000297935	-0.47	0.000352934
SH3PXD2B	ENSG00000174705	SH3 and PX domains 2B	protein_coding	-0.87	5.48	2.0672e-06	1.03273e-05	-0.57	3.91296e-06
PEG10	ENSG00000242265	paternally expressed 10	protein_coding	-0.83	3.52	0.0165863	0.00105439	-0.47	0.000321071
CDIP1	ENSG00000089486	cell death inducing p53 target 1	protein_coding	-0.81	5.23	1.16436e-06	6.38573e-06	-0.6	6.48744e-07
MMP14	ENSG00000157227	matrix metallopeptidase 14	protein_coding	-0.8	6.8	4.28883e-06	3.08144e-07	-0.65	2.79585e-08
CERCAM	ENSG00000167123	cerebral endothelial cell adhesion molecule	protein_coding	-0.79	5.37	1.04551e-06	5.78647e-06	-0.59	8.60895e-07
NACC2	ENSG00000148411	NACC family member 2	protein_coding	-0.76	6.16	0.000138058	0.000587634	-0.47	0.000352934
CALM1	ENSG00000198668	calmodulin 1	protein_coding	-0.74	8.71	1.36649e-08	3.49769e-07	-0.66	9.83278e-09
BTG3	ENSG00000154640	BTG anti-proliferation factor 3	protein_coding	-0.73	4.57	2.55336e-06	8.19343e-07	-0.57	3.41444e-06
SH3PXD2A	ENSG00000107957	SH3 and PX domains 2A	protein_coding	-0.73	6.24	2.49031e-05	4.65756e-05	-0.55	1.01733e-05
PPP1R12C	ENSG00000125503	protein phosphatase 1 regulatory subunit 12C	protein_coding	-0.7	6.48	1.4774e-06	3.12501e-06	-0.57	2.99831e-06
FADS1	ENSG00000149485	fatty acid desaturase 1	protein_coding	-0.68	5.67	0.00367787	1.35633e-05	-0.5	8.12124e-05
MAP3K14	ENSG00000006062	mitogen-activated protein kinase kinase kinase 14	protein_coding	-0.63	4.36	0.000415339	1.96007e-05	-0.49	0.000123889
INSIG1	ENSG00000186480	insulin induced gene 1	protein_coding	-0.62	6.93	0.0165388	0.0139518	-0.25	0.112891
ZFAND5	ENSG00000107372	zinc finger AN1-type containing 5	protein_coding	-0.62	7.65	6.11936e-07	8.19343e-07	-0.59	8.60895e-07
ENPP2	ENSG00000136960	ectonucleotide pyrophosphatase/phosphodiesterase 2	protein_coding	-0.61	5.54	0.0480409	0.00499081	-0.27	0.080786
GPCPD1	ENSG00000125772	glycerophosphocholine phosphodiesterase 1	protein_coding	-0.61	5.27	1.42365e-05	1.03273e-05	-0.54	1.46248e-05
CBX6	ENSG00000183741	chromobox 6	protein_coding	-0.6	6.9	0.00047566	0.000484355	-0.44	0.000936608
MGLL	ENSG00000074416	monoglyceride lipase	protein_coding	-0.59	6.48	0.00626854	0.0175542	-0.34	0.0193046
PLCE1	ENSG00000138193	phospholipase C epsilon 1	protein_coding	-0.58	3.83	0.00102562	0.000258085	-0.39	0.0041416
TRPV4	ENSG00000111199	transient receptor potential cation channel subfamily V member 4	protein_coding	-0.58	3.16	0.0419677	0.0200069	-0.34	0.0160305
SRF	ENSG00000112658	serum response factor	protein_coding	-0.57	7.01	0.000482139	0.000550382	-0.41	0.00230058
TAGLN2	ENSG00000158710	transgelin 2	protein_coding	-0.57	7.52	0.000550331	0.000121957	-0.47	0.000252907
RBFOX2	ENSG00000100320	RNA binding fox-1 homolog 2	protein_coding	-0.57	6.88	1.03069e-05	2.34632e-05	-0.52	4.39969e-05
PKD2	ENSG00000118762	polycystin 2, transient receptor potential cation channel	protein_coding	-0.55	5.41	0.000398161	0.000258085	-0.4	0.00317193
PTPN14	ENSG00000152104	protein tyrosine phosphatase non-receptor type 14	protein_coding	-0.54	6.2	0.00293797	0.000277228	-0.4	0.00370379
STAT5B	ENSG00000173757	signal transducer and activator of transcription 5B	protein_coding	-0.51	6.67	6.82696e-07	1.80784e-06	-0.62	1.94593e-07
FOXO1	ENSG00000150907	forkhead box O1	protein_coding	-0.51	5.18	0.000160633	2.1425e-05	-0.48	0.000196206
ARRDC2	ENSG00000105643	arrestin domain containing 2	protein_coding	-0.5	5.03	0.00609673	0.000319697	-0.4	0.00384397
ENAH	ENSG00000154380	ENAH actin regulator	protein_coding	-0.49	7.51	2.53762e-05	0.000121957	-0.51	6.16314e-05
JAG2	ENSG00000184916	jagged canonical Notch ligand 2	protein_coding	-0.49	5.09	0.00501864	0.0071382	-0.37	0.00794114
NR3C2	ENSG00000151623	nuclear receptor subfamily 3 group C member 2	protein_coding	-0.49	4.1	0.000206195	1.96007e-05	-0.48	0.000229242
FOSL2	ENSG00000075426	FOS like 2, AP-1 transcription factor subunit	protein_coding	-0.49	7.36	0.043867	0.0434428	-0.24	0.134186
SLC22A18AS	ENSG00000254827	solute carrier family 22 member 18 antisense	protein_coding	-0.48	-0.39	0.027721	0.000817229	-0.49	0.000117658
TENT5C	ENSG00000183508	terminal nucleotidyltransferase 5C	protein_coding	-0.48	5.49	0.00937246	0.00789261	-0.39	0.00480607
MPRIP	ENSG00000133030	myosin phosphatase Rho interacting protein	protein_coding	-0.47	7.2	0.000319291	0.000343955	-0.47	0.000336332
PITPNM2	ENSG00000090975	phosphatidylinositol transfer protein membrane associated 2	protein_coding	-0.45	3.62	0.0103915	0.00257471	-0.33	0.019924
ST3GAL2	ENSG00000157350	ST3 beta-galactoside alpha-2,3-sialyltransferase 2	protein_coding	-0.45	4.45	0.00270042	0.00135209	-0.41	0.00220977
ITPRID2	ENSG00000138434	ITPR interacting domain containing 2	protein_coding	-0.45	6.86	0.00431191	0.00472447	-0.31	0.0370163
SPRY1	ENSG00000164056	sprouty RTK signaling antagonist 1	protein_coding	-0.43	6.12	0.0344153	0.0329931	-0.23	0.165711
HMG20A	ENSG00000140382	high mobility group 20A	protein_coding	-0.41	4.36	0.00430602	4.65756e-05	-0.41	0.00230058
ACTN4	ENSG00000130402	actinin alpha 4	protein_coding	-0.4	8.87	8.10997e-05	0.000131957	-0.5	7.69886e-05
EIF4EBP2	ENSG00000148730	eukaryotic translation initiation factor 4E binding protein 2	protein_coding	-0.4	7.36	0.000178591	3.62569e-05	-0.5	9.05969e-05
MAP4	ENSG00000047849	microtubule associated protein 4	protein_coding	-0.39	8.37	0.00556278	0.0386248	-0.28	0.0630105
FAXC	ENSG00000146267	failed axon connections homolog, metaxin like GST domain containing	protein_coding	-0.37	3.66	0.00784064	0.00472447	-0.33	0.0212086
ELK3	ENSG00000111145	ETS transcription factor ELK3	protein_coding	-0.37	5.28	0.0273762	0.0269539	-0.2	0.23123
TGFB1	ENSG00000105329	transforming growth factor beta 1	protein_coding	-0.36	5.04	0.0449712	0.0248266	-0.3	0.0412351
CLUAP1	ENSG00000103351	clusterin associated protein 1	protein_coding	-0.36	4.88	1.81606e-05	1.60999e-06	-0.58	1.49334e-06
KIAA0930	ENSG00000100364	KIAA0930	protein_coding	-0.36	6.4	0.00808755	0.00305782	-0.36	0.00977267
PLEKHG2	ENSG00000090924	pleckstrin homology and RhoGEF domain containing G2	protein_coding	-0.36	4.32	0.0357519	0.0401766	-0.27	0.0750475
SLC25A24	ENSG00000085491	solute carrier family 25 member 24	protein_coding	-0.36	4.79	0.00711839	0.000343955	-0.38	0.00620283
WDR44	ENSG00000131725	WD repeat domain 44	protein_coding	-0.36	4.4	0.00625692	0.00204666	-0.34	0.0160305
DNASE2	ENSG00000105612	deoxyribonuclease 2, lysosomal	protein_coding	-0.35	5.96	0.0134291	0.0071382	-0.39	0.00517162
EHD1	ENSG00000110047	EH domain containing 1	protein_coding	-0.35	5.8	0.0114711	0.0146191	-0.29	0.0539611
TMX4	ENSG00000125827	thioredoxin related transmembrane protein 4	protein_coding	-0.34	7.24	0.0189991	0.0329931	-0.25	0.118125
NOL4L	ENSG00000197183	nucleolar protein 4 like	protein_coding	-0.34	4.7	0.00307448	0.00216808	-0.38	0.00597887
SEMA4C	ENSG00000168758	semaphorin 4C	protein_coding	-0.33	5.91	0.0128747	0.00447755	-0.37	0.00794114
ALDOA	ENSG00000149925	aldolase, fructose-bisphosphate A	protein_coding	-0.31	9.74	0.0115663	0.00613803	-0.29	0.0554101
PKM	ENSG00000067225	pyruvate kinase M1/2	protein_coding	-0.31	9.47	0.00335253	2.79808e-05	-0.46	0.000470463
SLC35E4	ENSG00000100036	solute carrier family 35 member E4	protein_coding	-0.31	1.73	0.021258	0.00645785	-0.33	0.0205721
SAE1	ENSG00000142230	SUMO1 activating enzyme subunit 1	protein_coding	-0.3	6.37	0.00424616	0.000192439	-0.42	0.00164565
THAP11	ENSG00000168286	THAP domain containing 11	protein_coding	-0.3	4.71	0.00395267	0.000165671	-0.46	0.000449455
NEK9	ENSG00000119638	NIMA related kinase 9	protein_coding	-0.27	6.89	0.00795128	0.00583098	-0.29	0.0525211
OTUD1	ENSG00000165312	OTU deubiquitinase 1	protein_coding	-0.27	4.11	0.00500571	0.000343955	-0.44	0.000979719
DVL2	ENSG00000004975	dishevelled segment polarity protein 2	protein_coding	-0.26	5.49	0.00516244	0.000871419	-0.44	0.000782847
KLHDC2	ENSG00000165516	kelch domain containing 2	protein_coding	-0.26	5.41	0.0165383	0.000207215	-0.35	0.0145503
HMGB1	ENSG00000189403	high mobility group box 1	protein_coding	-0.24	7.65	0.0109668	0.00161812	-0.42	0.00187126
PRKAR1A	ENSG00000108946	protein kinase cAMP-dependent type I regulatory subunit alpha	protein_coding	-0.24	8.02	0.0123162	0.00499081	-0.36	0.01119
WDR53	ENSG00000185798	WD repeat domain 53	protein_coding	-0.23	2.49	0.0306864	0.0110517	-0.39	0.00517162
DEK	ENSG00000124795	DEK proto-oncogene	protein_coding	-0.23	6.74	0.0266294	0.00960035	-0.37	0.00767762
DCAF15	ENSG00000132017	DDB1 and CUL4 associated factor 15	protein_coding	-0.23	4.23	0.00859526	0.000451634	-0.37	0.00822707
POLR2C	ENSG00000102978	RNA polymerase II subunit C	protein_coding	-0.22	6.16	0.0272027	0.00914711	-0.39	0.00463331
GINM1	ENSG00000055211	glycoprotein integral membrane 1	protein_coding	-0.22	6.07	0.0304598	0.00789261	-0.34	0.0193046
CAST	ENSG00000153113	calpastatin	protein_coding	-0.22	8.06	0.0276699	0.00613803	-0.37	0.00767762
TNIP1	ENSG00000145901	TNFAIP3 interacting protein 1	protein_coding	-0.21	6.84	0.0266882	0.0228166	-0.3	0.0472526
MBD1	ENSG00000141644	methyl-CpG binding domain protein 1	protein_coding	-0.2	5.8	0.00890265	0.000240277	-0.39	0.00498396
SUPT5H	ENSG00000196235	SPT5 homolog, DSIF elongation factor subunit	protein_coding	0.19	7.43	0.0247167	0.00424223	0.36	0.0115672
U2AF2	ENSG00000063244	U2 small nuclear RNA auxiliary factor 2	protein_coding	0.21	7.23	0.00323814	1.79854e-05	0.47	0.000352934
ISG20L2	ENSG00000143319	interferon stimulated exonuclease gene 20 like 2	protein_coding	0.21	5.52	0.0164689	0.00645785	0.37	0.00822707
RBM10	ENSG00000182872	RNA binding motif protein 10	protein_coding	0.21	6.35	0.0205721	0.00750043	0.32	0.0277311
GGA1	ENSG00000100083	golgi associated, gamma adaptin ear containing, ARF binding protein 1	protein_coding	0.22	6.03	0.0321228	0.0191569	0.3	0.0412351
RUVBL2	ENSG00000183207	RuvB like AAA ATPase 2	protein_coding	0.23	6.3	0.0457558	0.00341981	0.25	0.112891
CXXC5	ENSG00000171604	CXXC finger protein 5	protein_coding	0.24	5.68	0.0318398	0.00305782	0.32	0.0277311
PIGG	ENSG00000174227	phosphatidylinositol glycan anchor biosynthesis class G	protein_coding	0.24	5.44	0.0410876	0.00447755	0.36	0.0104711
SCYL1	ENSG00000142186	SCY1 like pseudokinase 1	protein_coding	0.24	7.05	0.00504293	0.00152142	0.37	0.00715575
WDR6	ENSG00000178252	WD repeat domain 6	protein_coding	0.24	7.79	0.0377614	0.0022933	0.35	0.0145503
BRD2	ENSG00000204256	bromodomain containing 2	protein_coding	0.24	8.23	0.0171426	0.0115934	0.3	0.0484832
EIPR1	ENSG00000032389	EARP complex and GARP complex interacting protein 1	protein_coding	0.24	4.61	0.0104036	0.00112039	0.39	0.0041416
MKNK2	ENSG00000099875	MAPK interacting serine/threonine kinase 2	protein_coding	0.25	7.94	0.0351889	0.0269539	0.33	0.019924
RAPGEF6	ENSG00000158987	Rap guanine nucleotide exchange factor 6	protein_coding	0.25	3.65	0.0247765	0.000991802	0.4	0.00342323
SLC30A5	ENSG00000145740	solute carrier family 30 member 5	protein_coding	0.25	6.16	0.0139711	0.00204666	0.39	0.00430865
PIAS4	ENSG00000105229	protein inhibitor of activated STAT 4	protein_coding	0.25	4.85	0.00222195	7.02704e-05	0.45	0.000516065
BCL2L1	ENSG00000171552	BCL2 like 1	protein_coding	0.26	6.9	0.00888248	0.00583098	0.41	0.00230058
FOXRED1	ENSG00000110074	FAD dependent oxidoreductase domain containing 1	protein_coding	0.26	4.68	0.0283973	0.00525639	0.3	0.0412351
EI24	ENSG00000149547	EI24 autophagy associated transmembrane protein	protein_coding	0.26	7.16	0.00169699	3.06238e-05	0.42	0.00195299
HSPA9	ENSG00000113013	heat shock protein family A (Hsp70) member 9	protein_coding	0.27	8.14	0.00326682	0.000192439	0.49	0.000160171
RNF149	ENSG00000163162	ring finger protein 149	protein_coding	0.27	5.44	0.00788226	0.000207215	0.37	0.00794114
OMA1	ENSG00000162600	OMA1 zinc metallopeptidase	protein_coding	0.27	4.81	0.00614519	0.00181931	0.42	0.00179426
AP1G1	ENSG00000166747	adaptor related protein complex 1 subunit gamma 1	protein_coding	0.27	7.03	0.0380888	0.012702	0.31	0.038
C1orf43	ENSG00000143612	chromosome 1 open reading frame 43	protein_coding	0.27	7.82	0.0231183	0.0022933	0.42	0.00151033
FLAD1	ENSG00000160688	flavin adenine dinucleotide synthetase 1	protein_coding	0.27	4.86	0.00249396	0.000394797	0.4	0.00342323
MSH3	ENSG00000113318	mutS homolog 3	protein_coding	0.28	4.73	0.0111855	6.4725e-05	0.34	0.0175789
SRCAP	ENSG00000080603	Snf2 related CREBBP activator protein	protein_coding	0.28	7.49	0.0148549	0.00583098	0.39	0.00498396
ZMIZ2	ENSG00000122515	zinc finger MIZ-type containing 2	protein_coding	0.28	6.81	0.0128297	0.0357581	0.34	0.0175789
G3BP1	ENSG00000145907	G3BP stress granule assembly factor 1	protein_coding	0.28	7.36	0.000836803	6.4725e-05	0.51	5.22851e-05
GSK3B	ENSG00000082701	glycogen synthase kinase 3 beta	protein_coding	0.28	6.24	0.0150956	0.000484355	0.35	0.0127561
CCT6A	ENSG00000146731	chaperonin containing TCP1 subunit 6A	protein_coding	0.29	7.22	0.00718553	0.000394797	0.47	0.000321071
FUBP1	ENSG00000162613	far upstream element binding protein 1	protein_coding	0.29	6.41	0.00266239	0.00181931	0.43	0.00138889
IRGQ	ENSG00000167378	immunity related GTPase Q	protein_coding	0.29	5.24	0.0105168	0.00341981	0.36	0.0108333
BMS1	ENSG00000165733	BMS1 ribosome biogenesis factor	protein_coding	0.29	5.82	0.00245086	9.61399e-05	0.42	0.00164565
GATAD2A	ENSG00000167491	GATA zinc finger domain containing 2A	protein_coding	0.29	5.97	0.00685202	0.00525639	0.54	1.46248e-05
GATD1	ENSG00000177225	glutamine amidotransferase like class 1 domain containing 1	protein_coding	0.29	6.28	0.00064895	9.61399e-05	0.45	0.000650583
ATXN2L	ENSG00000168488	ataxin 2 like	protein_coding	0.3	6.59	0.000669639	0.000673328	0.52	3.32546e-05
TUBG1	ENSG00000131462	tubulin gamma 1	protein_coding	0.3	5.28	0.0155192	0.0115934	0.34	0.0165217
KDM5C	ENSG00000126012	lysine demethylase 5C	protein_coding	0.3	6.81	0.000570852	7.02704e-05	0.52	3.32546e-05
UBALD2	ENSG00000185262	UBA like domain containing 2	protein_coding	0.3	5.13	0.0395956	0.00119295	0.3	0.0484832
RPS5	ENSG00000083845	ribosomal protein S5	protein_coding	0.3	9.62	0.0469863	0.0105588	0.3	0.0412351
SFPQ	ENSG00000116560	splicing factor proline and glutamine rich	protein_coding	0.3	7.94	0.00137632	4.65756e-05	0.45	0.000516065
POU2F1	ENSG00000143190	POU class 2 homeobox 1	protein_coding	0.31	5.26	0.0185408	0.0105588	0.33	0.0246928
ACTG1	ENSG00000184009	actin gamma 1	protein_coding	0.31	11.34	0.0208113	0.00204666	0.37	0.00851886
EIF4B	ENSG00000063046	eukaryotic translation initiation factor 4B	protein_coding	0.31	8.96	0.0005201	0.000516437	0.48	0.000240953
LONP2	ENSG00000102910	lon peptidase 2, peroxisomal	protein_coding	0.31	7.23	0.0050643	0.00105439	0.39	0.00463331
PLEKHB2	ENSG00000115762	pleckstrin homology domain containing B2	protein_coding	0.32	7.4	0.0271726	0.00828476	0.33	0.019924
IFRD2	ENSG00000214706	interferon related developmental regulator 2	protein_coding	0.32	5.92	0.00572643	0.00360705	0.41	0.00230058
PTBP1	ENSG00000011304	polypyrimidine tract binding protein 1	protein_coding	0.32	7.86	0.000294966	3.33837e-05	0.54	1.55462e-05
INPPL1	ENSG00000165458	inositol polyphosphate phosphatase like 1	protein_coding	0.32	6.97	0.000192838	6.4725e-05	0.51	4.9437e-05
RAN	ENSG00000132341	RAN, member RAS oncogene family	protein_coding	0.32	7.48	0.0154604	0.00869812	0.34	0.0165217
NSMAF	ENSG00000035681	neutral sphingomyelinase activation associated factor	protein_coding	0.32	5.39	0.0024465	0.000277228	0.44	0.000979719
GTF3C4	ENSG00000125484	general transcription factor IIIC subunit 4	protein_coding	0.32	5.72	0.00476975	0.000319697	0.35	0.0123306
GOLGA2	ENSG00000167110	golgin A2	protein_coding	0.32	7.08	0.000782031	0.000673328	0.49	0.000130248
PRKCSH	ENSG00000130175	protein kinase C substrate 80K-H	protein_coding	0.33	8.67	0.00886546	0.00119295	0.38	0.00576225
NACC1	ENSG00000160877	nucleus accumbens associated 1	protein_coding	0.33	6.2	0.00245529	0.000394797	0.38	0.00667083
GOLGA4	ENSG00000144674	golgin A4	protein_coding	0.34	7.51	0.00856142	0.00828476	0.34	0.0155289
CYTH2	ENSG00000105443	cytohesin 2	protein_coding	0.34	6.27	6.97071e-05	0.000207215	0.55	6.98217e-06
NUP155	ENSG00000113569	nucleoporin 155	protein_coding	0.34	5.25	0.0130888	0.00525639	0.37	0.00912223
PPP6R2	ENSG00000100239	protein phosphatase 6 regulatory subunit 2	protein_coding	0.34	6.56	0.000254333	0.000178993	0.52	3.52245e-05
WWP2	ENSG00000198373	WW domain containing E3 ubiquitin protein ligase 2	protein_coding	0.34	6.39	0.0103133	0.00678033	0.39	0.00446675
ZNF783	ENSG00000204946	zinc finger family member 783	protein_coding	0.35	3.75	0.00763249	0.0228166	0.36	0.0115672
EMC10	ENSG00000161671	ER membrane protein complex subunit 10	protein_coding	0.35	7.72	0.00407149	0.00243316	0.37	0.00741405
PIK3CB	ENSG00000051382	phosphatidylinositol-4,5-bisphosphate 3-kinase catalytic subunit beta	protein_coding	0.35	6.03	0.00400798	0.00401963	0.4	0.00305149
WDR4	ENSG00000160193	WD repeat domain 4	protein_coding	0.35	2.82	0.00781533	0.000991802	0.47	0.000321071
PUS1	ENSG00000177192	pseudouridine synthase 1	protein_coding	0.35	3.82	0.0169838	0.00613803	0.33	0.0246928
NIFK	ENSG00000155438	nucleolar protein interacting with the FHA domain of MKI67	protein_coding	0.35	5.1	0.00179727	0.000368453	0.48	0.000196206
MRPL37	ENSG00000116221	mitochondrial ribosomal protein L37	protein_coding	0.36	6.02	7.78516e-05	4.75591e-06	0.53	2.08635e-05
PRKDC	ENSG00000253729	protein kinase, DNA-activated, catalytic subunit	protein_coding	0.36	7.52	0.0438795	0.0146191	0.31	0.0339903
CLTC	ENSG00000141367	clathrin heavy chain	protein_coding	0.36	9.13	0.0035501	0.000153928	0.41	0.00259788
RPL4	ENSG00000174444	ribosomal protein L4	protein_coding	0.37	10.83	0.0047613	0.000767531	0.34	0.0175789
HDHD5	ENSG00000069998	haloacid dehalogenase like hydrolase domain containing 5	protein_coding	0.37	5.39	0.000262322	5.78647e-06	0.54	1.15269e-05
PIKFYVE	ENSG00000115020	phosphoinositide kinase, FYVE-type zinc finger containing	protein_coding	0.38	6.03	0.00932964	0.00105439	0.34	0.0160305
HSPA8	ENSG00000109971	heat shock protein family A (Hsp70) member 8	protein_coding	0.38	10.1	0.0320034	0.00112039	0.35	0.0119412
DPY19L3	ENSG00000178904	dpy-19 like C-mannosyltransferase 3	protein_coding	0.38	6.08	0.00397279	0.000817229	0.42	0.00187126
FEN1	ENSG00000168496	flap structure-specific endonuclease 1	protein_coding	0.39	4.08	0.000843555	1.15271e-06	0.52	3.71881e-05
NOLC1	ENSG00000166197	nucleolar and coiled-body phosphoprotein 1	protein_coding	0.39	7	0.000159763	0.000192439	0.52	2.97314e-05
G3BP2	ENSG00000138757	G3BP stress granule assembly factor 2	protein_coding	0.39	8.17	0.00354324	0.000165671	0.46	0.000470463
GSE1	ENSG00000131149	Gse1 coiled-coil protein	protein_coding	0.39	6.72	0.00277085	0.00789261	0.37	0.00912223
NOP56	ENSG00000101361	NOP56 ribonucleoprotein	protein_coding	0.39	6.4	2.23919e-06	1.80784e-06	0.61	3.11666e-07
SPRYD4	ENSG00000176422	SPRY domain containing 4	protein_coding	0.39	4.87	0.000131802	0.000207215	0.54	1.21931e-05
ZNF24	ENSG00000172466	zinc finger protein 24	protein_coding	0.39	7.1	0.000138224	1.63596e-05	0.51	4.9437e-05
RANGAP1	ENSG00000100401	Ran GTPase activating protein 1	protein_coding	0.4	6.62	0.000471453	0.000165671	0.5	0.000105737
TOMM40	ENSG00000130204	translocase of outer mitochondrial membrane 40	protein_coding	0.4	5.58	0.00203803	1.35633e-05	0.41	0.00239643
HM13	ENSG00000101294	histocompatibility minor 13	protein_coding	0.4	8.04	0.02239	0.00323605	0.44	0.000895433
NR2F6	ENSG00000160113	nuclear receptor subfamily 2 group F member 6	protein_coding	0.41	5.55	0.00399281	0.000516437	0.37	0.00767762
HLTF	ENSG00000071794	helicase like transcription factor	protein_coding	0.41	5.98	0.00439515	2.79808e-05	0.37	0.00881069
LARP1	ENSG00000155506	La ribonucleoprotein 1, translational regulator	protein_coding	0.41	7.72	0.000108795	0.000240277	0.54	1.75221e-05
KLHL8	ENSG00000145332	kelch like family member 8	protein_coding	0.41	5.04	0.000126048	0.000297935	0.5	7.69886e-05
RPLP0	ENSG00000089157	ribosomal protein lateral stalk subunit P0	protein_coding	0.42	10.64	0.00585068	0.000767531	0.4	0.0035599
MLEC	ENSG00000110917	malectin	protein_coding	0.42	8.64	0.000246934	8.9001e-05	0.5	7.28603e-05
APMAP	ENSG00000101474	adipocyte plasma membrane associated protein	protein_coding	0.42	7.3	0.00059786	0.000394797	0.48	0.000177283
MYSM1	ENSG00000162601	Myb like, SWIRM and MPN domains 1	protein_coding	0.42	4.98	0.00524864	0.00143505	0.34	0.0165217
ELL2	ENSG00000118985	elongation factor for RNA polymerase II 2	protein_coding	0.43	7.43	0.0298928	0.0486699	0.33	0.0225874
TMED9	ENSG00000184840	transmembrane p24 trafficking protein 9	protein_coding	0.44	7.97	0.00120314	0.000628978	0.42	0.00203407
ZNF432	ENSG00000256087	zinc finger protein 432	protein_coding	0.44	4.81	0.00397791	0.0022933	0.36	0.00977267
CNOT6	ENSG00000113300	CCR4-NOT transcription complex subunit 6	protein_coding	0.44	5.9	5.23088e-05	1.35633e-05	0.55	1.01733e-05
ALDH18A1	ENSG00000059573	aldehyde dehydrogenase 18 family member A1	protein_coding	0.44	6.9	0.000613287	0.000451634	0.51	6.16314e-05
DDOST	ENSG00000244038	dolichyl-diphosphooligosaccharide--protein glycosyltransferase non-catalytic subunit	protein_coding	0.45	8.18	8.63541e-05	0.000178993	0.55	8.45401e-06
ARID1A	ENSG00000117713	AT-rich interaction domain 1A	protein_coding	0.45	7.28	0.00205126	0.00127185	0.4	0.0035599
RACK1	ENSG00000204628	receptor for activated C kinase 1	protein_coding	0.45	10.58	0.00274566	0.000277228	0.41	0.00239643
CPT2	ENSG00000157184	carnitine palmitoyltransferase 2	protein_coding	0.45	5.23	0.000157767	3.33837e-05	0.5	9.05969e-05
KIAA0895	ENSG00000164542	KIAA0895	protein_coding	0.45	3.59	0.00641102	0.00583098	0.37	0.00881069
LRRC8D	ENSG00000171492	leucine rich repeat containing 8 VRAC subunit D	protein_coding	0.45	4.45	0.00010309	2.79808e-05	0.53	2.49308e-05
NDC1	ENSG00000058804	NDC1 transmembrane nucleoporin	protein_coding	0.45	4.61	0.000155548	2.79808e-05	0.5	8.58552e-05
TJP1	ENSG00000104067	tight junction protein 1	protein_coding	0.46	7.43	0.000276045	0.000142294	0.48	0.000206283
ASNS	ENSG00000070669	asparagine synthetase (glutamine-hydrolyzing)	protein_coding	0.46	4.64	0.000215746	0.0017163	0.47	0.000265288
ZNF678	ENSG00000181450	zinc finger protein 678	protein_coding	0.46	3.93	0.00037187	3.12501e-06	0.51	6.52208e-05
RPL36	ENSG00000130255	ribosomal protein L36	protein_coding	0.46	9.01	0.0139055	0.0022933	0.34	0.0193046
MYDGF	ENSG00000074842	myeloid derived growth factor	protein_coding	0.46	6.97	0.00144644	0.000718092	0.43	0.00127175
KDELR2	ENSG00000136240	KDEL endoplasmic reticulum protein retention receptor 2	protein_coding	0.47	8.73	9.21389e-05	2.1425e-05	0.49	0.000137486
PNKP	ENSG00000039650	polynucleotide kinase 3'-phosphatase	protein_coding	0.47	5.31	0.000797233	1.12712e-05	0.42	0.00151033
WDR3	ENSG00000065183	WD repeat domain 3	protein_coding	0.48	5.3	8.71465e-05	8.23356e-05	0.55	9.58463e-06
NPDC1	ENSG00000107281	neural proliferation, differentiation and control 1	protein_coding	0.48	8.27	0.0202924	0.0121378	0.25	0.107985
DIPK1B	ENSG00000165716	divergent protein kinase domain 1B	protein_coding	0.48	3.56	0.009442	0.000718092	0.37	0.00767762
EIF4G1	ENSG00000114867	eukaryotic translation initiation factor 4 gamma 1	protein_coding	0.49	8.92	0.00016236	4.65756e-05	0.5	8.12124e-05
TANC2	ENSG00000170921	tetratricopeptide repeat, ankyrin repeat and coiled-coil containing 2	protein_coding	0.49	5.28	0.00279193	0.000516437	0.43	0.00127175
DNAJC5	ENSG00000101152	DnaJ heat shock protein family (Hsp40) member C5	protein_coding	0.49	7.13	1.11514e-05	2.34632e-05	0.55	9.00445e-06
TMEM30B	ENSG00000182107	transmembrane protein 30B	protein_coding	0.49	6.96	0.000324508	0.000165671	0.48	0.000168411
TTC39A	ENSG00000085831	tetratricopeptide repeat domain 39A	protein_coding	0.49	6.16	0.00245813	0.00127185	0.44	0.00102326
APLP2	ENSG00000084234	amyloid beta precursor like protein 2	protein_coding	0.5	10.29	4.9492e-05	5.47903e-05	0.53	2.49308e-05
LPCAT1	ENSG00000153395	lysophosphatidylcholine acyltransferase 1	protein_coding	0.5	5.73	1.28496e-05	7.70176e-06	0.59	1.06037e-06
SMARCC1	ENSG00000173473	SWI/SNF related, matrix associated, actin dependent regulator of chromatin subfamily c member 1	protein_coding	0.51	7.64	2.84451e-05	1.12712e-05	0.52	3.93514e-05
P2RY11	ENSG00000244165	purinergic receptor P2Y11	protein_coding	0.51	2.41	0.00646431	0.00447755	0.36	0.0115672
EIF3B	ENSG00000106263	eukaryotic translation initiation factor 3 subunit B	protein_coding	0.52	7.7	3.37994e-06	4.27225e-06	0.62	1.53163e-07
INTS5	ENSG00000185085	integrator complex subunit 5	protein_coding	0.52	5.68	1.04346e-06	1.80784e-06	0.62	1.80288e-07
SEC23B	ENSG00000101310	SEC23 homolog B, COPII coat complex component	protein_coding	0.53	7.18	0.00261343	0.000223079	0.43	0.00132988
ANKRD52	ENSG00000139645	ankyrin repeat domain 52	protein_coding	0.53	6.12	0.000421101	3.33837e-05	0.42	0.00157495
PRRC2A	ENSG00000204469	proline rich coiled-coil 2A	protein_coding	0.53	8.86	1.13224e-06	3.86319e-06	0.64	3.86948e-08
ZNF121	ENSG00000197961	zinc finger protein 121	protein_coding	0.53	4.96	8.32147e-05	3.95011e-05	0.52	2.97314e-05
DDI2	ENSG00000197312	DNA damage inducible 1 homolog 2	protein_coding	0.53	6.64	0.000149818	1.23999e-05	0.5	9.55207e-05
NOCT	ENSG00000151014	nocturnin	protein_coding	0.53	1.68	0.00551756	0.00112039	0.39	0.00446675
KMT2D	ENSG00000167548	lysine methyltransferase 2D	protein_coding	0.54	6.9	0.0038491	0.00243316	0.37	0.00715575
BCAT2	ENSG00000105552	branched chain amino acid transaminase 2	protein_coding	0.54	6.15	7.21603e-05	0.000628978	0.49	0.000130248
TRIM11	ENSG00000154370	tripartite motif containing 11	protein_coding	0.54	4.97	2.03969e-06	2.83471e-06	0.61	4.21904e-07
MEX3D	ENSG00000181588	mex-3 RNA binding family member D	protein_coding	0.55	4.58	2.7448e-05	1.96007e-05	0.58	1.84325e-06
VARS1	ENSG00000204394	valyl-tRNA synthetase 1	protein_coding	0.56	6.29	1.18015e-06	5.78647e-06	0.69	2.0139e-09
POLR1B	ENSG00000125630	RNA polymerase I subunit B	protein_coding	0.56	4.66	9.84918e-07	7.00418e-06	0.59	1.39099e-06
FNBP1L	ENSG00000137942	formin binding protein 1 like	protein_coding	0.56	6.68	7.33254e-05	2.1425e-05	0.54	1.75221e-05
PIGM	ENSG00000143315	phosphatidylinositol glycan anchor biosynthesis class M	protein_coding	0.57	5.53	3.87935e-06	6.38573e-06	0.65	2.57881e-08
IGF1R	ENSG00000140443	insulin like growth factor 1 receptor	protein_coding	0.57	7.7	0.00408314	0.0071382	0.36	0.0115672
DVL1	ENSG00000107404	dishevelled segment polarity protein 1	protein_coding	0.57	6.3	4.5955e-06	4.75591e-06	0.6	5.24671e-07
TONSL	ENSG00000160949	tonsoku like, DNA repair protein	protein_coding	0.57	3.31	0.000387671	0.000516437	0.53	2.80449e-05
CEACAM19	ENSG00000186567	CEA cell adhesion molecule 19	protein_coding	0.59	2.69	0.0248525	0.00613803	0.29	0.0511779
AAK1	ENSG00000115977	AP2 associated kinase 1	protein_coding	0.6	6.56	0.00025585	0.000550382	0.47	0.000279073
DIAPH1	ENSG00000131504	diaphanous related formin 1	protein_coding	0.6	6.75	6.50408e-06	3.06238e-05	0.58	1.84325e-06
SLC25A39	ENSG00000013306	solute carrier family 25 member 39	protein_coding	0.63	7.42	9.61092e-05	8.46964e-06	0.46	0.000427974
SYNJ2	ENSG00000078269	synaptojanin 2	protein_coding	0.65	5.78	5.26864e-06	0.000131957	0.54	1.15269e-05
DHCR24	ENSG00000116133	24-dehydrocholesterol reductase	protein_coding	0.65	9.9	0.00647145	7.02704e-05	0.48	0.000186495
ATP2C1	ENSG00000017260	ATPase secretory pathway Ca2+ transporting 1	protein_coding	0.65	8.56	8.48683e-05	7.02704e-05	0.54	1.65294e-05
PXDN	ENSG00000130508	peroxidasin	protein_coding	0.66	6.94	0.00305507	0.00112039	0.45	0.000566618
SND1	ENSG00000197157	staphylococcal nuclease and tudor domain containing 1	protein_coding	0.66	8.75	3.00207e-07	1.27503e-06	0.63	8.08646e-08
SASH1	ENSG00000111961	SAM and SH3 domain containing 1	protein_coding	0.67	6.29	5.63374e-05	3.33837e-05	0.51	6.88119e-05
ITPR2	ENSG00000123104	inositol 1,4,5-trisphosphate receptor type 2	protein_coding	0.68	6.18	0.00190944	0.00424223	0.38	0.00535947
EEF2	ENSG00000167658	eukaryotic translation elongation factor 2	protein_coding	0.69	12.08	5.88977e-09	4.75591e-06	0.69	2.0139e-09
CENPI	ENSG00000102384	centromere protein I	protein_coding	0.69	-0.01	0.0320205	0.0269539	0.29	0.049806
SHROOM3	ENSG00000138771	shroom family member 3	protein_coding	0.69	7.33	3.78645e-05	0.000277228	0.46	0.000407262
LRBA	ENSG00000198589	LPS responsive beige-like anchor protein	protein_coding	0.7	7.49	3.70964e-05	8.46964e-06	0.54	1.46248e-05
APRT	ENSG00000198931	adenine phosphoribosyltransferase	protein_coding	0.72	6.96	4.18716e-05	2.1425e-05	0.48	0.000240953
ODC1	ENSG00000115758	ornithine decarboxylase 1	protein_coding	0.73	8.28	0.00131403	0.00193142	0.48	0.000206283
MAZ	ENSG00000103495	MYC associated zinc finger protein	protein_coding	0.75	6.59	8.64841e-06	1.35633e-05	0.55	7.43394e-06
PHF12	ENSG00000109118	PHD finger protein 12	protein_coding	0.76	6.86	1.14968e-07	5.10665e-07	0.66	1.28453e-08
KIF11	ENSG00000138160	kinesin family member 11	protein_coding	0.78	2.79	0.000934725	0.000142294	0.49	0.000137486
WWC1	ENSG00000113645	WW and C2 domain containing 1	protein_coding	0.79	6.94	4.03844e-06	1.48971e-05	0.62	2.27874e-07
H2BC12	ENSG00000197903	H2B clustered histone 12	protein_coding	0.8	5.46	0.000464553	8.9001e-05	0.53	2.80449e-05
TTLL12	ENSG00000100304	tubulin tyrosine ligase like 12	protein_coding	0.82	6.9	3.40156e-07	3.12501e-06	0.63	8.70134e-08
ACLY	ENSG00000131473	ATP citrate lyase	protein_coding	0.82	8.68	5.27934e-06	2.02182e-06	0.59	8.60895e-07
MTHFD2	ENSG00000065911	methylenetetrahydrofolate dehydrogenase (NADP+ dependent) 2, methenyltetrahydrofolate cyclohydrolase	protein_coding	0.83	5.6	7.16584e-08	1.44185e-06	0.67	9.07373e-09
MYC	ENSG00000136997	MYC proto-oncogene, bHLH transcription factor	protein_coding	0.84	6.7	0.00337395	0.00119295	0.49	0.000160171
XPO6	ENSG00000169180	exportin 6	protein_coding	0.85	6.9	4.13078e-08	3.49769e-07	0.68	3.82394e-09
CBX2	ENSG00000173894	chromobox 2	protein_coding	0.88	1.76	0.00736903	0.0071382	0.45	0.000621082
IMPDH2	ENSG00000178035	inosine monophosphate dehydrogenase 2	protein_coding	0.89	7.93	3.33394e-07	5.78647e-06	0.62	1.80288e-07
ACACA	ENSG00000278540	acetyl-CoA carboxylase alpha	protein_coding	0.91	8.11	9.5341e-09	8.19343e-07	0.66	1.53586e-08
DUS1L	ENSG00000169718	dihydrouridine synthase 1 like	protein_coding	0.91	7.19	4.77793e-06	2.1425e-05	0.69	2.0139e-09
CABP4	ENSG00000175544	calcium binding protein 4	protein_coding	0.94	2.04	3.76318e-05	5.96611e-05	0.55	6.98217e-06
TP53INP1	ENSG00000164938	tumor protein p53 inducible nuclear protein 1	protein_coding	0.94	7.06	1.9507e-07	3.12501e-06	0.66	1.07763e-08
TET3	ENSG00000187605	tet methylcytosine dioxygenase 3	protein_coding	0.94	5.11	9.32264e-07	7.00418e-06	0.59	1.06037e-06
SAPCD2	ENSG00000186193	suppressor APC domain containing 2	protein_coding	0.95	4.75	0.000776152	8.9001e-05	0.58	1.72008e-06
H1-2	ENSG00000187837	H1,2 linker histone, cluster member	protein_coding	0.98	7.29	0.00315279	0.00914711	0.32	0.0311463
UAP1	ENSG00000117143	UDP-N-acetylglucosamine pyrophosphorylase 1	protein_coding	0.99	7.3	1.15226e-06	1.03273e-05	0.62	1.53163e-07
ALDH3B2	ENSG00000132746	aldehyde dehydrogenase 3 family member B2	protein_coding	1	5.26	0.0409496	0.00914711	0.5	7.28603e-05
TMEM184A	ENSG00000164855	transmembrane protein 184A	protein_coding	1.01	5.31	2.23572e-06	6.4725e-05	0.64	4.18998e-08
SLC12A8	ENSG00000221955	solute carrier family 12 member 8	protein_coding	1.01	4.34	4.23644e-07	3.34939e-08	0.67	7.75279e-09
MYO6	ENSG00000196586	myosin VI	protein_coding	1.04	7.5	0.000186989	0.00119295	0.45	0.000650583
FNIP2	ENSG00000052795	folliculin interacting protein 2	protein_coding	1.11	6.33	2.49196e-06	5.47903e-05	0.52	3.71881e-05
AGMAT	ENSG00000116771	agmatinase	protein_coding	1.13	1.67	2.2642e-05	2.56593e-05	0.6	8.04276e-07
COLEC12	ENSG00000158270	collectin subfamily member 12	protein_coding	1.26	6.39	1.2539e-06	2.6609e-07	0.6	5.24671e-07
RAB3B	ENSG00000169213	RAB3B, member RAS oncogene family	protein_coding	1.27	7.8	0.000135299	5.10665e-07	0.63	1.21209e-07
BIRC5	ENSG00000089685	baculoviral IAP repeat containing 5	protein_coding	1.34	2.35	0.000887698	1.96007e-05	0.64	3.86948e-08
LRFN1	ENSG00000128011	leucine rich repeat and fibronectin type III domain containing 1	protein_coding	1.35	2.63	1.56456e-09	1.029e-06	0.77	2.78226e-12
TRIM36	ENSG00000152503	tripartite motif containing 36	protein_coding	1.35	5.28	2.73079e-06	4.77598e-08	0.69	1.6775e-09
CAMKV	ENSG00000164076	CaM kinase like vesicle associated	protein_coding	1.37	-3.54	0.0291734	0.036881	0.3	0.046905
SMS	ENSG00000102172	spermine synthase	protein_coding	1.4	8.51	2.47772e-05	0.00381366	0.39	0.00517162
FASN	ENSG00000169710	fatty acid synthase	protein_coding	1.47	10.28	2.16253e-06	2.34632e-05	0.66	1.67621e-08
KIF18B	ENSG00000186185	kinesin family member 18B	protein_coding	1.52	0.35	0.000397293	0.000343955	0.5	8.58552e-05
TRIB1	ENSG00000173334	tribbles pseudokinase 1	protein_coding	1.6	7.81	6.47082e-06	9.10646e-07	0.61	3.89939e-07
PPM1E	ENSG00000175175	protein phosphatase, Mg2+/Mn2+ dependent 1E	protein_coding	1.64	4.18	8.62147e-06	1.80784e-06	0.67	8.34362e-09
DLX2	ENSG00000115844	distal-less homeobox 2	protein_coding	1.69	0.98	0.0284951	0.000516437	0.68	3.5089e-09
SMPDL3B	ENSG00000130768	sphingomyelin phosphodiesterase acid like 3B	protein_coding	1.74	4.54	2.65549e-09	1.14387e-07	0.75	1.04307e-11
COL12A1	ENSG00000111799	collagen type XII alpha 1 chain	protein_coding	1.76	7.57	2.39288e-05	0.00381366	0.31	0.038
MON1B	ENSG00000103111	MON1 homolog B, secretory trafficking associated	protein_coding	2.39	8.06	1.76094e-08	7.00418e-06	0.48	0.000217954

## Sheet: miR423_5p
Gene name	Gene id	Description	Biotype	LogFC	LogCPM	QLF_FDR	MW_FDR	Spearman_correlation_coef	Spearman_correlation_FDR
PCSK9	ENSG00000169174	proprotein convertase subtilisin/kexin type 9	protein_coding	-2.04	-1.02	2.18319e-05	5.04194e-05	-0.51	4.66114e-05
SLC2A5	ENSG00000142583	solute carrier family 2 member 5	protein_coding	-1.93	4.8	9.43834e-06	4.27225e-06	-0.52	2.97314e-05
PCP4L1	ENSG00000248485	Purkinje cell protein 4 like 1	protein_coding	-1.87	2.84	2.22523e-07	5.10665e-07	-0.7	9.45377e-10
SMOC1	ENSG00000198732	SPARC related modular calcium binding 1	protein_coding	-1.87	5.87	7.81513e-08	9.10646e-07	-0.64	4.57231e-08
IGDCC4	ENSG00000103742	immunoglobulin superfamily DCC subclass member 4	protein_coding	-1.84	0.89	2.53821e-05	0.000153928	-0.44	0.00102326
TPM2	ENSG00000198467	tropomyosin 2	protein_coding	-1.81	10.03	2.84543e-08	7.2264e-07	-0.65	2.37517e-08
APOBEC3C	ENSG00000244509	apolipoprotein B mRNA editing enzyme catalytic subunit 3C	protein_coding	-1.78	5.99	3.14704e-10	3.20376e-08	-0.76	4.61843e-12
FOXQ1	ENSG00000164379	forkhead box Q1	protein_coding	-1.77	3.21	7.86669e-06	0.000121957	-0.57	2.99831e-06
HSPB7	ENSG00000173641	heat shock protein family B (small) member 7	protein_coding	-1.74	5.26	3.99533e-06	3.62569e-05	-0.56	6.12063e-06
DUSP2	ENSG00000158050	dual specificity phosphatase 2	protein_coding	-1.73	4.74	0.000122347	0.000297935	-0.31	0.038
TAGLN	ENSG00000149591	transgelin	protein_coding	-1.72	11	3.30561e-08	1.27503e-06	-0.65	3.30066e-08
ADAMTS5	ENSG00000154736	ADAM metallopeptidase with thrombospondin type 1 motif 5	protein_coding	-1.69	3.96	9.81245e-07	7.70176e-06	-0.55	7.43394e-06
CCDC85A	ENSG00000055813	coiled-coil domain containing 85A	protein_coding	-1.66	0.88	1.27752e-06	5.10665e-07	-0.52	3.1525e-05
ACTA2	ENSG00000107796	actin alpha 2, smooth muscle	protein_coding	-1.59	10.71	4.59787e-08	2.27033e-06	-0.65	2.02161e-08
TGFB1I1	ENSG00000140682	transforming growth factor beta 1 induced transcript 1	protein_coding	-1.55	6.32	3.46289e-08	1.44185e-06	-0.65	3.57365e-08
KCNK3	ENSG00000171303	potassium two pore domain channel subfamily K member 3	protein_coding	-1.54	5.46	1.54927e-06	2.34632e-05	-0.59	1.39099e-06
PALLD	ENSG00000129116	palladin, cytoskeletal associated protein	protein_coding	-1.5	8.81	6.24605e-08	3.99678e-07	-0.63	8.70134e-08
LIMS2	ENSG00000072163	LIM zinc finger domain containing 2	protein_coding	-1.46	6.6	1.85921e-07	4.75591e-06	-0.6	6.068e-07
WFIKKN2	ENSG00000173714	WAP, follistatin/kazal, immunoglobulin, kunitz and netrin domain containing 2	protein_coding	-1.46	-0.12	3.46085e-07	3.12501e-06	-0.63	9.46683e-08
IGF2	ENSG00000167244	insulin like growth factor 2	protein_coding	-1.46	5.1	1.12346e-05	6.4725e-05	-0.47	0.000352934
RPRM	ENSG00000177519	reprimo, TP53 dependent G2 arrest mediator homolog	protein_coding	-1.39	2.33	2.78112e-08	7.00418e-06	-0.63	7.45556e-08
C10orf55	ENSG00000222047	chromosome 10 putative open reading frame 55	lncRNA	-1.38	-1.51	6.8035e-06	2.27033e-06	-0.6	4.85623e-07
UCHL1	ENSG00000154277	ubiquitin C-terminal hydrolase L1	protein_coding	-1.37	3.35	1.33366e-05	0.000516437	-0.54	1.38479e-05
CEACAM6	ENSG00000086548	CEA cell adhesion molecule 6	protein_coding	-1.35	3.12	0.00926767	0.0434428	-0.23	0.149819
EMP3	ENSG00000142227	epithelial membrane protein 3	protein_coding	-1.34	4.26	1.21673e-08	3.99678e-07	-0.63	1.31328e-07
AJAP1	ENSG00000196581	adherens junctions associated protein 1	protein_coding	-1.32	2	0.000843479	0.0468371	-0.21	0.204858
HACD1	ENSG00000165996	3-hydroxyacyl-CoA dehydratase 1	protein_coding	-1.3	3.11	1.25205e-09	1.029e-06	-0.68	4.62291e-09
CDH2	ENSG00000170558	cadherin 2	protein_coding	-1.29	2.85	0.00173705	0.000587634	-0.41	0.00212264
CCND2	ENSG00000118971	cyclin D2	protein_coding	-1.26	6.39	1.82356e-06	1.60999e-06	-0.61	3.37147e-07
STOX2	ENSG00000173320	storkhead box 2	protein_coding	-1.25	3.06	7.83487e-08	4.13969e-08	-0.7	6.51314e-10
NCS1	ENSG00000107130	neuronal calcium sensor 1	protein_coding	-1.24	6.44	2.03331e-07	1.60999e-06	-0.63	9.46683e-08
STRIP2	ENSG00000128578	striatin interacting protein 2	protein_coding	-1.22	1.22	0.000293685	0.00499081	-0.38	0.00691133
HOXA7	ENSG00000122592	homeobox A7	protein_coding	-1.21	0.76	3.10904e-06	1.34643e-07	-0.66	1.17447e-08
REEP1	ENSG00000068615	receptor accessory protein 1	protein_coding	-1.2	3.88	1.5284e-06	4.75591e-06	-0.56	5.07086e-06
CDK15	ENSG00000138395	cyclin dependent kinase 15	protein_coding	-1.19	-0.14	0.000967668	0.0017163	-0.34	0.0175789
RNF165	ENSG00000141622	ring finger protein 165	protein_coding	-1.19	2.71	2.28793e-05	2.02182e-06	-0.59	1.20922e-06
PNMA8B	ENSG00000204851	PNMA family member 8B	protein_coding	-1.18	1.65	2.40295e-06	3.33837e-05	-0.51	4.66114e-05
EHD2	ENSG00000024422	EH domain containing 2	protein_coding	-1.17	6.98	4.55533e-07	1.12712e-05	-0.6	8.04276e-07
ATP2B4	ENSG00000058668	ATPase plasma membrane Ca2+ transporting 4	protein_coding	-1.16	7.58	5.02983e-06	2.79808e-05	-0.56	5.07086e-06
RAB34	ENSG00000109113	RAB34, member RAS oncogene family	protein_coding	-1.16	5.74	1.84859e-09	1.14387e-07	-0.76	4.61843e-12
PMP22	ENSG00000109099	peripheral myelin protein 22	protein_coding	-1.15	5.46	3.48138e-07	1.63596e-05	-0.57	2.61355e-06
ZNF516	ENSG00000101493	zinc finger protein 516	protein_coding	-1.15	5.04	6.68776e-09	5.10665e-07	-0.7	9.45377e-10
DDIT4	ENSG00000168209	DNA damage inducible transcript 4	protein_coding	-1.14	6.41	3.23868e-05	5.28358e-06	-0.51	5.22851e-05
ANO6	ENSG00000177119	anoctamin 6	protein_coding	-1.13	6.57	5.20665e-07	4.58686e-07	-0.64	3.86948e-08
EZHIP	ENSG00000187690	EZH inhibitory protein	protein_coding	-1.13	-3.62	0.00720548	0.00381366	-0.46	0.000477596
ITGA5	ENSG00000161638	integrin subunit alpha 5	protein_coding	-1.12	7.17	0.000120252	0.000394797	-0.38	0.00620283
STARD4	ENSG00000164211	StAR related lipid transfer domain containing 4	protein_coding	-1.12	4.57	3.05065e-05	0.000297935	-0.42	0.00157495
MAP1B	ENSG00000131711	microtubule associated protein 1B	protein_coding	-1.11	7.58	0.0001397	0.000192439	-0.45	0.000566618
PLEKHA2	ENSG00000169499	pleckstrin homology domain containing A2	protein_coding	-1.1	5.17	5.58739e-09	3.56548e-08	-0.7	8.80738e-10
ADGRG6	ENSG00000112414	adhesion G protein-coupled receptor G6	protein_coding	-1.1	4.16	0.000246064	0.000112656	-0.52	4.39969e-05
TIMP3	ENSG00000100234	TIMP metallopeptidase inhibitor 3	protein_coding	-1.09	3.69	0.000410489	0.000104097	-0.44	0.000936608
PLS3	ENSG00000102024	plastin 3	protein_coding	-1.09	5.27	1.62083e-08	1.14387e-07	-0.72	1.63291e-10
RBM38	ENSG00000132819	RNA binding motif protein 38	protein_coding	-1.07	5.19	7.63275e-09	5.70751e-07	-0.71	5.46399e-10
ASCL2	ENSG00000183734	achaete-scute family bHLH transcription factor 2	protein_coding	-1.05	1.65	0.00953766	0.000192439	-0.44	0.000895433
TNFRSF10D	ENSG00000173530	TNF receptor superfamily member 10d	protein_coding	-1.01	2.47	9.40517e-06	9.34876e-06	-0.53	2.2138e-05
TSPAN7	ENSG00000156298	tetraspanin 7	protein_coding	-0.98	4.31	2.20266e-05	7.70176e-06	-0.5	0.000100402
ASPH	ENSG00000198363	aspartate beta-hydroxylase	protein_coding	-0.97	6.67	1.77877e-08	4.77598e-08	-0.71	5.46399e-10
MYOF	ENSG00000138119	myoferlin	protein_coding	-0.97	7.24	5.63292e-06	5.70751e-07	-0.63	7.45556e-08
GRID1	ENSG00000182771	glutamate ionotropic receptor delta type subunit 1	protein_coding	-0.95	1.57	1.25889e-05	0.000153928	-0.47	0.000336332
CORO1C	ENSG00000110880	coronin 1C	protein_coding	-0.95	6.65	1.71202e-06	2.1425e-05	-0.56	5.74555e-06
RARG	ENSG00000172819	retinoic acid receptor gamma	protein_coding	-0.94	4.73	1.35257e-06	3.99678e-07	-0.64	6.30458e-08
RHOB	ENSG00000143878	ras homolog family member B	protein_coding	-0.91	9.25	5.37007e-05	4.58686e-07	-0.54	1.75221e-05
TNIK	ENSG00000154310	TRAF2 and NCK interacting kinase	protein_coding	-0.9	3.6	0.00392255	0.000718092	-0.36	0.01119
AQP3	ENSG00000165272	aquaporin 3 (Gill blood group)	protein_coding	-0.9	7.56	0.00295728	0.00152142	-0.37	0.00822707
PPARGC1B	ENSG00000155846	PPARG coactivator 1 beta	protein_coding	-0.89	3.34	0.000161618	3.62569e-05	-0.48	0.000217954
IER5	ENSG00000162783	immediate early response 5	protein_coding	-0.89	4.33	6.13486e-05	1.23999e-05	-0.48	0.000168411
NID1	ENSG00000116962	nidogen 1	protein_coding	-0.88	6.23	0.00109391	0.00552537	-0.37	0.00741405
SERPINE2	ENSG00000135919	serpin family E member 2	protein_coding	-0.88	3.93	0.00213085	0.00869812	-0.29	0.0525211
CITED4	ENSG00000179862	Cbp/p300 interacting transactivator with Glu/Asp rich carboxy-terminal domain 4	protein_coding	-0.87	3.91	1.91567e-05	1.15271e-06	-0.52	2.97314e-05
PEG10	ENSG00000242265	paternally expressed 10	protein_coding	-0.83	3.52	0.0165863	0.00105439	-0.47	0.000321071
PHF19	ENSG00000119403	PHD finger protein 19	protein_coding	-0.82	4.67	2.66374e-07	8.46964e-06	-0.58	1.60584e-06
NKD2	ENSG00000145506	NKD inhibitor of WNT signaling pathway 2	protein_coding	-0.82	1.71	0.000565557	9.61399e-05	-0.44	0.000979719
MMP2	ENSG00000087245	matrix metallopeptidase 2	protein_coding	-0.81	7.1	9.28005e-05	0.000277228	-0.45	0.000541144
ST3GAL1	ENSG00000008513	ST3 beta-galactoside alpha-2,3-sialyltransferase 1	protein_coding	-0.8	4.94	0.000386809	0.00204666	-0.42	0.00171864
MICALL1	ENSG00000100139	MICAL like 1	protein_coding	-0.79	5.75	8.69146e-08	7.2264e-07	-0.65	3.30066e-08
RPS6KL1	ENSG00000198208	ribosomal protein S6 kinase like 1	protein_coding	-0.79	1.59	0.00174603	0.000767531	-0.48	0.000240953
TEAD1	ENSG00000187079	TEA domain transcription factor 1	protein_coding	-0.79	6.45	2.65695e-05	4.2983e-05	-0.5	9.05969e-05
IGFBP4	ENSG00000141753	insulin like growth factor binding protein 4	protein_coding	-0.79	8.29	1.4901e-05	1.23999e-05	-0.52	3.71881e-05
TP73	ENSG00000078900	tumor protein p73	protein_coding	-0.79	2.9	0.00220808	0.00552537	-0.41	0.00249509
ZFP36L1	ENSG00000185650	ZFP36 ring finger protein like 1	protein_coding	-0.77	8.73	0.000140351	1.96007e-05	-0.49	0.000123889
ARL10	ENSG00000175414	ADP ribosylation factor like GTPase 10	protein_coding	-0.77	3.04	1.84906e-05	3.12501e-06	-0.55	9.00445e-06
TSC22D3	ENSG00000157514	TSC22 domain family member 3	protein_coding	-0.76	8.47	0.000439582	0.000929516	-0.33	0.0218743
MMP17	ENSG00000198598	matrix metallopeptidase 17	protein_coding	-0.75	0.55	0.00135981	0.000343955	-0.4	0.00317193
KIRREL1	ENSG00000183853	kirre like nephrin family adhesion molecule 1	protein_coding	-0.75	5.12	0.000599059	0.000991802	-0.45	0.000541144
CALM1	ENSG00000198668	calmodulin 1	protein_coding	-0.74	8.71	1.36649e-08	3.49769e-07	-0.66	9.83278e-09
TACC1	ENSG00000147526	transforming acidic coiled-coil containing protein 1	protein_coding	-0.74	7.78	7.61623e-05	5.28358e-06	-0.49	0.000123889
RGL1	ENSG00000143344	ral guanine nucleotide dissociation stimulator like 1	protein_coding	-0.74	5.07	0.000565164	0.000131957	-0.39	0.00463331
CD81	ENSG00000110651	CD81 molecule	protein_coding	-0.73	9.76	2.19781e-05	5.28358e-06	-0.53	1.96819e-05
PFKFB3	ENSG00000170525	6-phosphofructo-2-kinase/fructose-2,6-biphosphatase 3	protein_coding	-0.73	5.54	0.000951041	0.000673328	-0.41	0.00249509
ZNF655	ENSG00000197343	zinc finger protein 655	protein_coding	-0.73	5.47	0.0012585	7.62747e-05	-0.52	3.52245e-05
LPP	ENSG00000145012	LIM domain containing preferred translocation partner in lipoma	protein_coding	-0.73	8.94	0.000166131	0.000817229	-0.42	0.00171864
SH3PXD2A	ENSG00000107957	SH3 and PX domains 2A	protein_coding	-0.73	6.24	2.49031e-05	4.65756e-05	-0.55	1.01733e-05
ARL4C	ENSG00000188042	ADP ribosylation factor like GTPase 4C	protein_coding	-0.73	4.91	0.000120025	0.000131957	-0.55	9.58463e-06
ALDOC	ENSG00000109107	aldolase, fructose-bisphosphate C	protein_coding	-0.72	4.52	2.44272e-06	7.70176e-06	-0.61	3.89939e-07
DST	ENSG00000151914	dystonin	protein_coding	-0.72	7.71	0.00121651	0.000178993	-0.45	0.000516065
AKAP12	ENSG00000131016	A-kinase anchoring protein 12	protein_coding	-0.72	6.4	0.00474578	0.00869812	-0.36	0.01119
LPCAT4	ENSG00000176454	lysophosphatidylcholine acyltransferase 4	protein_coding	-0.7	3.97	3.25502e-06	2.6609e-07	-0.6	8.04276e-07
CDCA7	ENSG00000144354	cell division cycle associated 7	protein_coding	-0.69	2.44	0.00804711	0.00193142	-0.41	0.00212264
TLN1	ENSG00000137076	talin 1	protein_coding	-0.69	9.3	8.06112e-05	0.000817229	-0.44	0.00081789
ZYX	ENSG00000159840	zyxin	protein_coding	-0.68	7.4	4.76195e-05	5.96611e-05	-0.5	9.55207e-05
FADS1	ENSG00000149485	fatty acid desaturase 1	protein_coding	-0.68	5.67	0.00367787	1.35633e-05	-0.5	8.12124e-05
RAP1A	ENSG00000116473	RAP1A, member of RAS oncogene family	protein_coding	-0.68	6.6	3.088e-06	8.46964e-06	-0.57	2.61355e-06
KLHL3	ENSG00000146021	kelch like family member 3	protein_coding	-0.68	2.12	0.000854383	3.06238e-05	-0.44	0.000895433
NFASC	ENSG00000163531	neurofascin	protein_coding	-0.67	5.08	0.020007	0.0175542	-0.28	0.069672
PFKP	ENSG00000067057	phosphofructokinase, platelet	protein_coding	-0.67	6.58	0.000714481	0.00869812	-0.34	0.0160305
MTURN	ENSG00000180354	maturin, neural progenitor differentiation regulator homolog	protein_coding	-0.67	6.25	0.000289125	1.35633e-05	-0.49	0.000145098
PAK1	ENSG00000149269	p21 (RAC1) activated kinase 1	protein_coding	-0.66	5.65	9.00879e-05	0.000451634	-0.58	1.49334e-06
ARHGEF2	ENSG00000116584	Rho/Rac guanine nucleotide exchange factor 2	protein_coding	-0.66	4.96	2.2642e-05	3.95011e-05	-0.52	4.16055e-05
RIN3	ENSG00000100599	Ras and Rab interactor 3	protein_coding	-0.65	4.27	0.000366261	0.000550382	-0.45	0.000680102
MYADM	ENSG00000179820	myeloid associated differentiation marker	protein_coding	-0.65	7.8	0.00288464	0.00152142	-0.37	0.00794114
SYNGR1	ENSG00000100321	synaptogyrin 1	protein_coding	-0.64	5.48	0.000793647	0.000131957	-0.48	0.000177283
AXL	ENSG00000167601	AXL receptor tyrosine kinase	protein_coding	-0.64	5.6	0.000506231	0.000258085	-0.45	0.000680102
STING1	ENSG00000184584	stimulator of interferon response cGAMP interactor 1	protein_coding	-0.64	5.38	0.00138741	0.000178993	-0.47	0.000265288
ACTB	ENSG00000075624	actin beta	protein_coding	-0.63	12.05	1.52605e-05	1.03273e-05	-0.49	0.000152188
NR3C1	ENSG00000113580	nuclear receptor subfamily 3 group C member 1	protein_coding	-0.63	6.2	9.60792e-06	2.53463e-06	-0.57	3.41444e-06
AMOTL2	ENSG00000114019	angiomotin like 2	protein_coding	-0.63	6.37	0.00381721	0.00750043	-0.36	0.0108333
RAB23	ENSG00000112210	RAB23, member RAS oncogene family	protein_coding	-0.62	5.37	0.00986169	0.00341981	-0.38	0.00535947
TRMT9B	ENSG00000250305	tRNA methyltransferase 9B (putative)	protein_coding	-0.62	1.69	0.00561258	0.00828476	-0.33	0.0212086
AHDC1	ENSG00000126705	AT-hook DNA binding motif containing 1	protein_coding	-0.61	5.1	5.68377e-05	6.4725e-05	-0.53	2.64102e-05
TRPS1	ENSG00000104447	transcriptional repressor GATA binding 1	protein_coding	-0.61	5.28	0.000988788	0.000104097	-0.42	0.00187126
CELSR2	ENSG00000143126	cadherin EGF LAG seven-pass G-type receptor 2	protein_coding	-0.61	5.48	0.0030999	0.00323605	-0.38	0.00576225
CEBPB	ENSG00000172216	CCAAT enhancer binding protein beta	protein_coding	-0.6	5.21	0.0030066	2.79808e-05	-0.37	0.00822707
MFGE8	ENSG00000140545	milk fat globule EGF and factor V/VIII domain containing	protein_coding	-0.6	6.76	0.00369766	0.00204666	-0.38	0.00535947
CBX6	ENSG00000183741	chromobox 6	protein_coding	-0.6	6.9	0.00047566	0.000484355	-0.44	0.000936608
GFOD1	ENSG00000145990	glucose-fructose oxidoreductase domain containing 1	protein_coding	-0.6	3.62	0.00529672	0.00678033	-0.29	0.0583924
MTSS2	ENSG00000132613	MTSS I-BAR domain containing 2	protein_coding	-0.58	4.59	3.46969e-05	1.48971e-05	-0.59	1.29704e-06
UST	ENSG00000111962	uronyl 2-sulfotransferase	protein_coding	-0.57	4.24	0.00290819	0.000628978	-0.44	0.000782847
SLC6A6	ENSG00000131389	solute carrier family 6 member 6	protein_coding	-0.57	4.32	0.00181634	0.000484355	-0.41	0.00220977
HLA-DOA	ENSG00000204252	major histocompatibility complex, class II, DO alpha	protein_coding	-0.57	4.63	0.0198161	0.00472447	-0.34	0.0187378
SRF	ENSG00000112658	serum response factor	protein_coding	-0.57	7.01	0.000482139	0.000550382	-0.41	0.00230058
NDE1	ENSG00000072864	nudE neurodevelopment protein 1	protein_coding	-0.56	4.6	0.000475586	0.000192439	-0.48	0.000206283
NANOS1	ENSG00000188613	nanos C2HC-type zinc finger 1	protein_coding	-0.56	0.54	0.00623067	0.00288559	-0.43	0.00121758
SESTD1	ENSG00000187231	SEC14 and spectrin domain containing 1	protein_coding	-0.56	4.97	5.09009e-05	1.96007e-05	-0.51	5.83778e-05
TSPAN3	ENSG00000140391	tetraspanin 3	protein_coding	-0.55	7.46	0.00101248	9.61399e-05	-0.37	0.00822707
TPST2	ENSG00000128294	tyrosylprotein sulfotransferase 2	protein_coding	-0.54	4.9	0.00488291	0.0146191	-0.37	0.00881069
LINC02693	ENSG00000212719	long intergenic non-protein coding RNA 2693	lncRNA	-0.54	2.84	0.000101498	6.4725e-05	-0.53	1.85572e-05
PDE4D	ENSG00000113448	phosphodiesterase 4D	protein_coding	-0.53	6.14	0.000831006	6.4725e-05	-0.45	0.000650583
PLAGL1	ENSG00000118495	PLAG1 like zinc finger 1	protein_coding	-0.53	3.77	0.000900197	0.00105439	-0.44	0.000979719
SMAD7	ENSG00000101665	SMAD family member 7	protein_coding	-0.52	4.71	0.000269755	1.96007e-05	-0.49	0.000117658
STAT5B	ENSG00000173757	signal transducer and activator of transcription 5B	protein_coding	-0.51	6.67	6.82696e-07	1.80784e-06	-0.62	1.94593e-07
EPB41L1	ENSG00000088367	erythrocyte membrane protein band 4,1 like 1	protein_coding	-0.51	6.07	4.16666e-06	3.86319e-06	-0.59	8.60895e-07
IVNS1ABP	ENSG00000116679	influenza virus NS1A binding protein	protein_coding	-0.51	6.74	0.00105064	0.0121378	-0.34	0.0193046
MPP1	ENSG00000130830	membrane palmitoylated protein 1	protein_coding	-0.5	4.89	0.000166223	9.61399e-05	-0.49	0.000152188
PLCB1	ENSG00000182621	phospholipase C beta 1	protein_coding	-0.49	5.24	0.00202726	0.00678033	-0.39	0.00480607
RTL8C	ENSG00000134590	retrotransposon Gag like 8C	protein_coding	-0.49	6.61	0.000701758	3.62569e-05	-0.45	0.000593332
MFN2	ENSG00000116688	mitofusin 2	protein_coding	-0.49	7.35	4.64293e-05	8.46964e-06	-0.53	2.2138e-05
ENAH	ENSG00000154380	ENAH actin regulator	protein_coding	-0.49	7.51	2.53762e-05	0.000121957	-0.51	6.16314e-05
POU2F2	ENSG00000028277	POU class 2 homeobox 2	protein_coding	-0.48	3.35	0.0385191	0.0292706	-0.26	0.0987742
PIP5K1C	ENSG00000186111	phosphatidylinositol-4-phosphate 5-kinase type 1 gamma	protein_coding	-0.48	6.66	0.000500732	0.00112039	-0.4	0.00329041
USP11	ENSG00000102226	ubiquitin specific peptidase 11	protein_coding	-0.48	6.55	1.40686e-05	2.56593e-05	-0.57	2.79726e-06
RARA	ENSG00000131759	retinoic acid receptor alpha	protein_coding	-0.47	5.22	0.000620096	0.000817229	-0.42	0.00203407
PBXIP1	ENSG00000163346	PBX homeobox interacting protein 1	protein_coding	-0.47	7.72	4.33636e-06	1.63596e-05	-0.6	7.46979e-07
KLHL21	ENSG00000162413	kelch like family member 21	protein_coding	-0.46	6.35	0.000434654	0.000451634	-0.47	0.000265288
PGAM1	ENSG00000171314	phosphoglycerate mutase 1	protein_coding	-0.45	4.93	0.000816243	4.58686e-07	-0.49	0.000160171
GNG12	ENSG00000172380	G protein subunit gamma 12	protein_coding	-0.45	6.93	0.000185819	8.46964e-06	-0.46	0.000407262
TXNIP	ENSG00000265972	thioredoxin interacting protein	protein_coding	-0.45	9.34	0.00365431	0.000258085	-0.41	0.00259788
ZFP36L2	ENSG00000152518	ZFP36 ring finger protein like 2	protein_coding	-0.45	8.05	0.00685956	0.00914711	-0.33	0.0232659
NFE2L2	ENSG00000116044	nuclear factor, erythroid 2 like 2	protein_coding	-0.45	6.92	4.32226e-06	6.42498e-07	-0.63	7.45556e-08
GLCE	ENSG00000138604	glucuronic acid epimerase	protein_coding	-0.45	4.62	0.00276927	1.79854e-05	-0.46	0.000388637
GPSM3	ENSG00000213654	G protein signaling modulator 3	protein_coding	-0.45	3.37	0.0275632	0.00257471	-0.34	0.0187378
ITPRIP	ENSG00000148841	inositol 1,4,5-trisphosphate receptor interacting protein	protein_coding	-0.44	5.54	0.00993808	0.00341981	-0.39	0.00463331
ADH5	ENSG00000197894	alcohol dehydrogenase 5 (class III), chi polypeptide	protein_coding	-0.43	7.75	0.00638293	0.00381366	-0.34	0.0155289
SPTBN1	ENSG00000115306	spectrin beta, non-erythrocytic 1	protein_coding	-0.43	8.81	0.0143137	0.00583098	-0.29	0.0511779
MAPKBP1	ENSG00000137802	mitogen-activated protein kinase binding protein 1	protein_coding	-0.43	4.57	0.00134252	0.000223079	-0.42	0.00157495
NOD1	ENSG00000106100	nucleotide binding oligomerization domain containing 1	protein_coding	-0.43	2.63	0.0121901	0.0100811	-0.3	0.0484832
PHGDH	ENSG00000092621	phosphoglycerate dehydrogenase	protein_coding	-0.42	7.25	0.00663596	0.00401963	-0.4	0.00293093
NLGN2	ENSG00000169992	neuroligin 2	protein_coding	-0.42	5.18	0.00381178	0.00381366	-0.39	0.0041416
PCGF5	ENSG00000180628	polycomb group ring finger 5	protein_coding	-0.41	6.18	0.000871856	0.000121957	-0.45	0.000650583
PTEN	ENSG00000171862	phosphatase and tensin homolog	protein_coding	-0.4	6.85	0.0088927	0.000516437	-0.38	0.00555594
ACTN4	ENSG00000130402	actinin alpha 4	protein_coding	-0.4	8.87	8.10997e-05	0.000131957	-0.5	7.69886e-05
EIF4EBP2	ENSG00000148730	eukaryotic translation initiation factor 4E binding protein 2	protein_coding	-0.4	7.36	0.000178591	3.62569e-05	-0.5	9.05969e-05
KANSL3	ENSG00000114982	KAT8 regulatory NSL complex subunit 3	protein_coding	-0.4	6.19	6.91403e-06	2.53463e-06	-0.58	2.45272e-06
SIMC1	ENSG00000170085	SUMO interacting motifs containing 1	protein_coding	-0.4	3.9	0.00315807	0.00143505	-0.33	0.0232659
JADE2	ENSG00000043143	jade family PHD finger 2	protein_coding	-0.4	5.65	0.00733886	0.00341981	-0.38	0.00555594
MAP4	ENSG00000047849	microtubule associated protein 4	protein_coding	-0.39	8.37	0.00556278	0.0386248	-0.28	0.0630105
ZBTB4	ENSG00000174282	zinc finger and BTB domain containing 4	protein_coding	-0.39	7.58	0.000349432	5.96611e-05	-0.5	0.000105737
MAPK7	ENSG00000166484	mitogen-activated protein kinase 7	protein_coding	-0.38	4.22	0.000370737	0.000192439	-0.45	0.000566618
CRIM1	ENSG00000150938	cysteine rich transmembrane BMP regulator 1	protein_coding	-0.38	6.72	0.0139638	0.0191569	-0.32	0.0285701
RCOR3	ENSG00000117625	REST corepressor 3	protein_coding	-0.38	5.89	0.00199282	0.000516437	-0.53	2.49308e-05
EFHD2	ENSG00000142634	EF-hand domain family member D2	protein_coding	-0.37	6.21	0.0159806	0.00127185	-0.34	0.0160305
BTBD3	ENSG00000132640	BTB domain containing 3	protein_coding	-0.37	5.37	0.0107892	0.00360705	-0.34	0.0193046
VPS29	ENSG00000111237	VPS29 retromer complex component	protein_coding	-0.37	5.81	0.00253648	0.00112039	-0.52	3.52245e-05
PEA15	ENSG00000162734	proliferation and apoptosis adaptor protein 15	protein_coding	-0.36	7.87	0.00728622	0.00828476	-0.35	0.0119412
LZTS2	ENSG00000107816	leucine zipper tumor suppressor 2	protein_coding	-0.36	6.57	0.00186889	8.23356e-05	-0.45	0.000516065
RIC1	ENSG00000107036	RIC1 homolog, RAB6A GEF complex partner 1	protein_coding	-0.36	4.56	0.017891	0.00499081	-0.29	0.059952
TXNRD1	ENSG00000198431	thioredoxin reductase 1	protein_coding	-0.35	6.56	0.04606	0.0269539	-0.24	0.137027
KLHL15	ENSG00000174010	kelch like family member 15	protein_coding	-0.35	4.34	0.048663	0.0167927	-0.26	0.0943614
SQSTM1	ENSG00000161011	sequestosome 1	protein_coding	-0.34	8.05	0.000864054	1.12712e-05	-0.49	0.000117658
ANKRD42	ENSG00000137494	ankyrin repeat domain 42	protein_coding	-0.34	4.01	0.00126575	0.00341981	-0.45	0.000680102
C22orf39	ENSG00000242259	chromosome 22 open reading frame 39	protein_coding	-0.34	5.24	0.00352981	0.000767531	-0.37	0.00881069
CDC42BPA	ENSG00000143776	CDC42 binding protein kinase alpha	protein_coding	-0.34	6.86	0.0207375	0.0191569	-0.28	0.0714286
PSMB10	ENSG00000205220	proteasome 20S subunit beta 10	protein_coding	-0.34	4.45	0.0206891	0.00869812	-0.41	0.00270499
ZBTB38	ENSG00000177311	zinc finger and BTB domain containing 38	protein_coding	-0.33	6.71	0.0268019	0.000718092	-0.32	0.0262319
FAM131A	ENSG00000175182	family with sequence similarity 131 member A	protein_coding	-0.33	4.17	0.00481625	0.000258085	-0.4	0.00384397
SHMT1	ENSG00000176974	serine hydroxymethyltransferase 1	protein_coding	-0.32	4.82	0.0238086	0.0139518	-0.36	0.0115672
PRKACA	ENSG00000072062	protein kinase cAMP-activated catalytic subunit alpha	protein_coding	-0.32	6.64	0.00117383	0.00161812	-0.37	0.00881069
PKM	ENSG00000067225	pyruvate kinase M1/2	protein_coding	-0.31	9.47	0.00335253	2.79808e-05	-0.46	0.000470463
SEPTIN9	ENSG00000184640	septin 9	protein_coding	-0.31	8.19	0.0252509	0.0133182	-0.31	0.038
ATL2	ENSG00000119787	atlastin GTPase 2	protein_coding	-0.31	6.04	0.00440008	0.000516437	-0.38	0.00643704
LDB1	ENSG00000198728	LIM domain binding 1	protein_coding	-0.3	5.98	0.00997561	0.000121957	-0.4	0.00370379
MRPL34	ENSG00000130312	mitochondrial ribosomal protein L34	protein_coding	-0.28	5.3	0.0486818	0.0418084	-0.26	0.0899542
MAP3K7	ENSG00000135341	mitogen-activated protein kinase kinase kinase 7	protein_coding	-0.28	5.56	0.00976191	0.000142294	-0.39	0.00480607
PAFAH1B1	ENSG00000007168	platelet activating factor acetylhydrolase 1b regulatory subunit 1	protein_coding	-0.27	6.97	0.00904612	0.000421634	-0.36	0.01119
VEZF1	ENSG00000136451	vascular endothelial zinc finger 1	protein_coding	-0.27	6.24	0.0357585	0.000142294	-0.33	0.0205721
SLC48A1	ENSG00000211584	solute carrier family 48 member 1	protein_coding	-0.26	5.16	0.0314516	0.0343475	-0.24	0.137996
MAPK3	ENSG00000102882	mitogen-activated protein kinase 3	protein_coding	-0.26	5.83	0.00539183	0.000319697	-0.42	0.00179426
TIMM10B	ENSG00000132286	translocase of inner mitochondrial membrane 10B	protein_coding	-0.26	5.69	0.0016426	0.000178993	-0.46	0.000370213
RNH1	ENSG00000023191	ribonuclease/angiogenin inhibitor 1	protein_coding	-0.26	7.52	0.00236229	8.9001e-05	-0.45	0.000650583
PNRC1	ENSG00000146278	proline rich nuclear receptor coactivator 1	protein_coding	-0.25	6.86	0.0345844	0.0238209	-0.3	0.0448381
DDX24	ENSG00000089737	DEAD-box helicase 24	protein_coding	-0.25	7.66	0.00881712	0.00401963	-0.36	0.0101249
OPA1	ENSG00000198836	OPA1 mitochondrial dynamin like GTPase	protein_coding	-0.24	6.23	0.0336237	0.0238209	-0.25	0.105661
PRKAR1A	ENSG00000108946	protein kinase cAMP-dependent type I regulatory subunit alpha	protein_coding	-0.24	8.02	0.0123162	0.00499081	-0.36	0.01119
H3-3B	ENSG00000132475	H3,3 histone B	protein_coding	-0.24	9.07	0.00161225	0.000421634	-0.46	0.000449455
ARPP19	ENSG00000128989	cAMP regulated phosphoprotein 19	protein_coding	-0.23	7.06	0.00657428	0.000153928	-0.41	0.00259788
EMC8	ENSG00000131148	ER membrane protein complex subunit 8	protein_coding	-0.23	4.27	0.0428168	0.0105588	-0.36	0.0115672
CSDE1	ENSG00000009307	cold shock domain containing E1	protein_coding	-0.22	9.62	0.0268839	0.00678033	-0.27	0.0840704
MAX	ENSG00000125952	MYC associated factor X	protein_coding	-0.22	6.17	0.00153713	3.49769e-07	-0.5	0.000100402
CAST	ENSG00000153113	calpastatin	protein_coding	-0.22	8.06	0.0276699	0.00613803	-0.37	0.00767762
CD2BP2	ENSG00000169217	CD2 cytoplasmic tail binding protein 2	protein_coding	-0.22	6.23	0.00274906	1.96007e-05	-0.42	0.00151033
BCL7B	ENSG00000106635	BAF chromatin remodeling complex subunit BCL7B	protein_coding	-0.22	5.65	0.0279716	0.0110517	-0.31	0.0391025
SEPTIN8	ENSG00000164402	septin 8	protein_coding	-0.21	5.65	0.0238487	0.00613803	-0.35	0.0145503
MED20	ENSG00000124641	mediator complex subunit 20	protein_coding	-0.2	4.47	0.0273524	0.00960035	-0.35	0.0131946
TPGS2	ENSG00000134779	tubulin polyglutamylase complex subunit 2	protein_coding	-0.19	5.48	0.0385009	0.00288559	-0.31	0.0370163
PBX2	ENSG00000204304	PBX homeobox 2	protein_coding	-0.18	5.91	0.0430829	0.00272713	-0.36	0.00944364
GTPBP2	ENSG00000172432	GTP binding protein 2	protein_coding	-0.18	4.98	0.0349269	0.000368453	-0.4	0.00305149
RHOA	ENSG00000067560	ras homolog family member A	protein_coding	-0.17	8.77	0.0399844	0.00119295	-0.34	0.0181594
SEC31A	ENSG00000138674	SEC31 homolog A, COPII coat complex component	protein_coding	0.17	8.09	0.0395956	0.0100811	0.31	0.0370163
WIPF2	ENSG00000171475	WAS/WASL interacting protein family member 2	protein_coding	0.18	6.1	0.0477164	0.0191569	0.33	0.0246928
SMARCD1	ENSG00000066117	SWI/SNF related, matrix associated, actin dependent regulator of chromatin, subfamily d, member 1	protein_coding	0.18	5.69	0.0244088	0.00204666	0.34	0.0170479
KHSRP	ENSG00000088247	KH-type splicing regulatory protein	protein_coding	0.18	7.43	0.0478519	0.00181931	0.4	0.00384397
HDGF	ENSG00000143321	heparin binding growth factor	protein_coding	0.19	7.55	0.0443278	0.00828476	0.38	0.00667083
ARF3	ENSG00000134287	ADP ribosylation factor 3	protein_coding	0.19	7.91	0.0381503	0.0183564	0.28	0.0662622
UBAP2L	ENSG00000143569	ubiquitin associated protein 2 like	protein_coding	0.2	7.18	0.0215931	0.00645785	0.35	0.0131946
LSM14B	ENSG00000149657	LSM family member 14B	protein_coding	0.2	5.63	0.00806922	0.000871419	0.4	0.00370379
WDR5	ENSG00000196363	WD repeat domain 5	protein_coding	0.2	5.43	0.0109587	0.000277228	0.38	0.00535947
DAZAP1	ENSG00000071626	DAZ associated protein 1	protein_coding	0.2	6.22	0.0442668	0.012702	0.31	0.0330172
TEX261	ENSG00000144043	testis expressed 261	protein_coding	0.2	6.95	0.0266785	0.0115934	0.33	0.0239471
U2AF2	ENSG00000063244	U2 small nuclear RNA auxiliary factor 2	protein_coding	0.21	7.23	0.00323814	1.79854e-05	0.47	0.000352934
HNRNPU	ENSG00000153187	heterogeneous nuclear ribonucleoprotein U	protein_coding	0.21	8.72	0.029331	0.00181931	0.42	0.00164565
RNF10	ENSG00000022840	ring finger protein 10	protein_coding	0.21	7.81	0.0241132	0.000628978	0.32	0.0262319
TOMM70	ENSG00000154174	translocase of outer mitochondrial membrane 70	protein_coding	0.21	6.69	0.0402884	0.00257471	0.32	0.0262319
REPS1	ENSG00000135597	RALBP1 associated Eps domain containing 1	protein_coding	0.22	5.45	0.0321187	0.00401963	0.39	0.00480607
KLHL12	ENSG00000117153	kelch like family member 12	protein_coding	0.22	5.83	0.0188409	0.00135209	0.35	0.0140902
MTA2	ENSG00000149480	metastasis associated 1 family member 2	protein_coding	0.22	6.72	0.0142643	0.00112039	0.4	0.00370379
SCAMP3	ENSG00000116521	secretory carrier membrane protein 3	protein_coding	0.22	6.32	0.0447465	0.0167927	0.3	0.0448381
SRRT	ENSG00000087087	serrate, RNA effector molecule	protein_coding	0.22	6.78	0.025691	0.00525639	0.32	0.0262319
BSDC1	ENSG00000160058	BSD domain containing 1	protein_coding	0.22	7	0.00382891	0.000165671	0.43	0.00121758
SCAF4	ENSG00000156304	SR-related CTD associated factor 4	protein_coding	0.22	5.32	0.0175938	0.00381366	0.37	0.00881069
RMND5A	ENSG00000153561	required for meiotic nuclear division 5 homolog A	protein_coding	0.22	6.45	0.031486	0.0146191	0.35	0.0150343
AK2	ENSG00000004455	adenylate kinase 2	protein_coding	0.23	6.54	0.010209	0.000871419	0.37	0.00767762
TEX2	ENSG00000136478	testis expressed 2	protein_coding	0.23	6.39	0.0260884	0.00583098	0.35	0.0119412
MKRN1	ENSG00000133606	makorin ring finger protein 1	protein_coding	0.23	7.21	0.00453638	0.00305782	0.42	0.00157495
HNRNPA2B1	ENSG00000122566	heterogeneous nuclear ribonucleoprotein A2/B1	protein_coding	0.23	9.2	0.0411761	0.000718092	0.44	0.000895433
RC3H2	ENSG00000056586	ring finger and CCCH-type domains 2	protein_coding	0.23	5.75	0.0497882	0.0238209	0.31	0.0320716
CDK16	ENSG00000102225	cyclin dependent kinase 16	protein_coding	0.23	6.31	0.019993	0.00305782	0.4	0.00305149
LETMD1	ENSG00000050426	LETM1 domain containing 1	protein_coding	0.23	5.96	0.0103006	0.0071382	0.38	0.00555594
WDR6	ENSG00000178252	WD repeat domain 6	protein_coding	0.24	7.79	0.0377614	0.0022933	0.35	0.0145503
CXXC5	ENSG00000171604	CXXC finger protein 5	protein_coding	0.24	5.68	0.0318398	0.00305782	0.32	0.0277311
NUFIP2	ENSG00000108256	nuclear FMR1 interacting protein 2	protein_coding	0.24	6.58	0.0347971	0.030453	0.28	0.0645645
MKNK2	ENSG00000099875	MAPK interacting serine/threonine kinase 2	protein_coding	0.25	7.94	0.0351889	0.0269539	0.33	0.019924
PMPCA	ENSG00000165688	peptidase, mitochondrial processing subunit alpha	protein_coding	0.25	5.87	0.00539183	0.000178993	0.44	0.000746307
TRIM28	ENSG00000130726	tripartite motif containing 28	protein_coding	0.25	8.11	0.00507456	9.61399e-05	0.4	0.00305149
FHOD1	ENSG00000135723	formin homology 2 domain containing 1	protein_coding	0.25	4.34	0.0455082	0.0121378	0.3	0.0484832
GNS	ENSG00000135677	glucosamine (N-acetyl)-6-sulfatase	protein_coding	0.25	7.66	0.0169042	0.00401963	0.34	0.0165217
TAF4	ENSG00000130699	TATA-box binding protein associated factor 4	protein_coding	0.25	4.23	0.0144469	0.00424223	0.45	0.000541144
YIPF2	ENSG00000130733	Yip1 domain family member 2	protein_coding	0.25	5.93	0.0296628	0.0153172	0.34	0.0187378
MSL1	ENSG00000188895	MSL complex subunit 1	protein_coding	0.25	6.4	0.0115981	0.00341981	0.4	0.00342323
CSNK1E	ENSG00000213923	casein kinase 1 epsilon	protein_coding	0.25	6.95	0.00356175	0.00143505	0.46	0.000388637
AP3M1	ENSG00000185009	adaptor related protein complex 3 subunit mu 1	protein_coding	0.26	6.25	0.0439685	0.0146191	0.29	0.0525211
CHD8	ENSG00000100888	chromodomain helicase DNA binding protein 8	protein_coding	0.26	6.65	0.0375659	0.0153172	0.32	0.0311463
GPS1	ENSG00000169727	G protein pathway suppressor 1	protein_coding	0.26	7.05	0.0237609	0.0183564	0.31	0.0330172
CELF1	ENSG00000149187	CUGBP Elav-like family member 1	protein_coding	0.26	6.88	0.00237165	0.000297935	0.49	0.000152188
NCOA5	ENSG00000124160	nuclear receptor coactivator 5	protein_coding	0.26	5.86	0.00759512	0.00135209	0.38	0.00576225
SCAMP2	ENSG00000140497	secretory carrier membrane protein 2	protein_coding	0.27	7.09	0.0200553	0.00401963	0.34	0.0193046
CLSTN1	ENSG00000171603	calsyntenin 1	protein_coding	0.27	9.02	0.0324241	0.0175542	0.32	0.0277311
FAM120A	ENSG00000048828	family with sequence similarity 120A	protein_coding	0.27	7.93	0.00147572	0.000258085	0.45	0.000621082
C1orf43	ENSG00000143612	chromosome 1 open reading frame 43	protein_coding	0.27	7.82	0.0231183	0.0022933	0.42	0.00151033
SMPD4	ENSG00000136699	sphingomyelin phosphodiesterase 4	protein_coding	0.27	5.89	0.0132938	0.000929516	0.43	0.00121758
CDC42SE1	ENSG00000197622	CDC42 small effector 1	protein_coding	0.27	6.83	0.0135479	0.00305782	0.4	0.00293093
NGLY1	ENSG00000151092	N-glycanase 1	protein_coding	0.27	5.2	0.0119241	0.000673328	0.37	0.00741405
CLPTM1	ENSG00000104853	CLPTM1 regulator of GABA type A receptor forward trafficking	protein_coding	0.27	7.49	0.011382	0.00583098	0.35	0.0145503
RFNG	ENSG00000169733	RFNG O-fucosylpeptide 3-beta-N-acetylglucosaminyltransferase	protein_coding	0.27	5.62	0.0228606	0.00447755	0.31	0.038
PSMD11	ENSG00000108671	proteasome 26S subunit, non-ATPase 11	protein_coding	0.28	6.51	0.000296178	2.34632e-05	0.52	2.97314e-05
YWHAE	ENSG00000108953	tyrosine 3-monooxygenase/tryptophan 5-monooxygenase activation protein epsilon	protein_coding	0.28	9.14	0.0222459	0.00181931	0.32	0.026961
SLC11A2	ENSG00000110911	solute carrier family 11 member 2	protein_coding	0.28	6.6	0.0144871	0.00341981	0.43	0.00132988
SURF4	ENSG00000148248	surfeit 4	protein_coding	0.28	8.5	0.00740626	5.04194e-05	0.36	0.0101249
SMG7	ENSG00000116698	SMG7 nonsense mediated mRNA decay factor	protein_coding	0.28	6.61	0.000362195	7.02704e-05	0.52	3.93514e-05
FBXO5	ENSG00000112029	F-box protein 5	protein_coding	0.28	2.63	0.0442863	0.00525639	0.32	0.0285701
IP6K2	ENSG00000068745	inositol hexakisphosphate kinase 2	protein_coding	0.28	6.59	0.0017733	0.000319697	0.42	0.00164565
SRCAP	ENSG00000080603	Snf2 related CREBBP activator protein	protein_coding	0.28	7.49	0.0148549	0.00583098	0.39	0.00498396
ASXL1	ENSG00000171456	ASXL transcriptional regulator 1	protein_coding	0.28	5.99	0.013103	0.00645785	0.3	0.0472526
PPIA	ENSG00000196262	peptidylprolyl isomerase A	protein_coding	0.29	7.91	0.0338601	0.00257471	0.37	0.00881069
MTCH2	ENSG00000109919	mitochondrial carrier 2	protein_coding	0.29	6.41	0.0107271	0.000192439	0.37	0.00851886
DDX54	ENSG00000123064	DEAD-box helicase 54	protein_coding	0.29	6.37	0.00179409	0.000394797	0.47	0.000292139
RNF187	ENSG00000168159	ring finger protein 187	protein_coding	0.29	7.35	0.00937872	0.00127185	0.35	0.0140902
SRP54	ENSG00000100883	signal recognition particle 54	protein_coding	0.29	6.16	0.0114009	0.00181931	0.41	0.00270499
TSC22D4	ENSG00000166925	TSC22 domain family member 4	protein_coding	0.29	6.48	0.0125797	0.0167927	0.37	0.00851886
DYNC1H1	ENSG00000197102	dynein cytoplasmic 1 heavy chain 1	protein_coding	0.29	8.94	0.0326401	0.0317288	0.33	0.0225874
GORASP2	ENSG00000115806	golgi reassembly stacking protein 2	protein_coding	0.29	7.02	0.00481349	0.000673328	0.42	0.00195299
IRF2BP1	ENSG00000170604	interferon regulatory factor 2 binding protein 1	protein_coding	0.29	5.54	0.0190535	0.00525639	0.31	0.038
C5orf22	ENSG00000082213	chromosome 5 open reading frame 22	protein_coding	0.29	4.87	0.0252802	0.00552537	0.32	0.0262319
AGK	ENSG00000006530	acylglycerol kinase	protein_coding	0.29	4.9	0.00060756	0.000112656	0.52	3.93514e-05
RAB40C	ENSG00000197562	RAB40C, member RAS oncogene family	protein_coding	0.29	5.3	0.026204	0.0175542	0.35	0.0150343
MDH2	ENSG00000146701	malate dehydrogenase 2	protein_coding	0.29	7.83	0.00411065	0.00360705	0.47	0.000321071
CREB3L2	ENSG00000182158	cAMP responsive element binding protein 3 like 2	protein_coding	0.3	7.3	0.0229841	0.0248266	0.29	0.049806
TSPAN14	ENSG00000108219	tetraspanin 14	protein_coding	0.3	7.14	0.00308406	0.0139518	0.42	0.00179426
KDM5C	ENSG00000126012	lysine demethylase 5C	protein_coding	0.3	6.81	0.000570852	7.02704e-05	0.52	3.32546e-05
THRAP3	ENSG00000054118	thyroid hormone receptor associated protein 3	protein_coding	0.3	7.89	0.00299207	0.000368453	0.4	0.0035599
TXNL4A	ENSG00000141759	thioredoxin like 4A	protein_coding	0.3	5.53	0.0179977	0.00243316	0.31	0.0359727
PRPF19	ENSG00000110107	pre-mRNA processing factor 19	protein_coding	0.3	7.66	0.000754421	0.000368453	0.44	0.000979719
MIEF1	ENSG00000100335	mitochondrial elongation factor 1	protein_coding	0.3	5.71	0.00127826	4.2983e-05	0.45	0.000593332
SYNRG	ENSG00000275066	synergin gamma	protein_coding	0.3	6.17	0.00702413	0.000207215	0.36	0.00944364
ACTG1	ENSG00000184009	actin gamma 1	protein_coding	0.31	11.34	0.0208113	0.00204666	0.37	0.00851886
DAG1	ENSG00000173402	dystroglycan 1	protein_coding	0.31	7.61	0.0111354	0.0105588	0.37	0.00715575
UBFD1	ENSG00000103353	ubiquitin family domain containing 1	protein_coding	0.31	6.24	0.000744444	0.000165671	0.47	0.000321071
RPL23A	ENSG00000198242	ribosomal protein L23a	protein_coding	0.31	8.92	0.00787106	0.0017163	0.37	0.00881069
STRN4	ENSG00000090372	striatin 4	protein_coding	0.31	6.81	0.000944619	0.000121957	0.44	0.000936608
CLCN7	ENSG00000103249	chloride voltage-gated channel 7	protein_coding	0.31	5.88	0.00240274	0.000178993	0.47	0.000321071
APEX1	ENSG00000100823	apurinic/apyrimidinic endodeoxyribonuclease 1	protein_coding	0.31	7.12	0.0039316	0.00381366	0.43	0.00138889
WDR45B	ENSG00000141580	WD repeat domain 45B	protein_coding	0.31	6.99	0.000925927	0.000131957	0.45	0.000516065
RAD23B	ENSG00000119318	RAD23 homolog B, nucleotide excision repair protein	protein_coding	0.31	7.78	0.000678621	0.000767531	0.53	2.08635e-05
MAN1B1	ENSG00000177239	mannosidase alpha class 1B member 1	protein_coding	0.31	6.57	0.0035866	0.000628978	0.38	0.00555594
SLC29A3	ENSG00000198246	solute carrier family 29 member 3	protein_coding	0.31	3.57	0.0267174	0.00161812	0.3	0.0401839
YIPF3	ENSG00000137207	Yip1 domain family member 3	protein_coding	0.31	7.5	0.0017753	0.000319697	0.39	0.00480607
LMNB2	ENSG00000176619	lamin B2	protein_coding	0.32	5.57	0.0150562	0.00341981	0.43	0.0011662
INPPL1	ENSG00000165458	inositol polyphosphate phosphatase like 1	protein_coding	0.32	6.97	0.000192838	6.4725e-05	0.51	4.9437e-05
ZBED1	ENSG00000214717	zinc finger BED-type containing 1	protein_coding	0.32	6.41	0.000492798	0.000297935	0.49	0.000123889
MGA	ENSG00000174197	MAX dimerization protein MGA	protein_coding	0.32	6	0.0149341	0.00869812	0.25	0.105661
ATAT1	ENSG00000137343	alpha tubulin acetyltransferase 1	protein_coding	0.32	3.79	0.0210718	0.0175542	0.35	0.0123306
UBA1	ENSG00000130985	ubiquitin like modifier activating enzyme 1	protein_coding	0.32	8.62	0.000509518	0.000178993	0.47	0.000336332
NACC1	ENSG00000160877	nucleus accumbens associated 1	protein_coding	0.33	6.2	0.00245529	0.000394797	0.38	0.00667083
PA2G4	ENSG00000170515	proliferation-associated 2G4	protein_coding	0.33	6.96	0.00179657	1.63596e-05	0.41	0.00230058
PDPK1	ENSG00000140992	3-phosphoinositide dependent protein kinase 1	protein_coding	0.33	5.41	0.0103225	0.00401963	0.36	0.0115672
LRRC58	ENSG00000163428	leucine rich repeat containing 58	protein_coding	0.33	6.26	0.0038973	0.000368453	0.39	0.00446675
COPB1	ENSG00000129083	COPI coat complex subunit beta 1	protein_coding	0.33	7.69	0.0027902	9.61399e-05	0.44	0.000855764
EP300	ENSG00000100393	E1A binding protein p300	protein_coding	0.33	7.13	0.0238466	0.0167927	0.28	0.069672
CCDC6	ENSG00000108091	coiled-coil domain containing 6	protein_coding	0.33	6.96	0.00835053	0.00401963	0.36	0.0115672
COG3	ENSG00000136152	component of oligomeric golgi complex 3	protein_coding	0.33	6.27	0.0082223	0.00305782	0.33	0.0246928
AFF1	ENSG00000172493	AF4/FMR2 family member 1	protein_coding	0.33	7.18	0.0216214	0.00828476	0.28	0.0679462
EXOC3-AS1	ENSG00000221990	EXOC3 antisense RNA 1	lncRNA	0.33	2.79	0.0328872	0.0105588	0.31	0.0349812
ZNF609	ENSG00000180357	zinc finger protein 609	protein_coding	0.34	6.43	0.00752482	0.00323605	0.41	0.00281752
PDIK1L	ENSG00000175087	PDLIM1 interacting kinase 1 like	protein_coding	0.34	4.14	0.00775641	0.000319697	0.34	0.0181594
CASP8	ENSG00000064012	caspase 8	protein_coding	0.34	4.25	0.00850331	0.0017163	0.43	0.0011662
TRABD	ENSG00000170638	TraB domain containing	protein_coding	0.34	5.33	0.0105984	0.00181931	0.45	0.000516065
UBN2	ENSG00000157741	ubinuclein 2	protein_coding	0.34	5.25	0.00680583	0.00869812	0.34	0.0181594
NF2	ENSG00000186575	neurofibromin 2	protein_coding	0.35	5.69	0.0050505	0.00143505	0.35	0.0150343
ARL6IP1	ENSG00000170540	ADP ribosylation factor like GTPase 6 interacting protein 1	protein_coding	0.35	7.53	0.0159266	0.00243316	0.37	0.00794114
POLR3H	ENSG00000100413	RNA polymerase III subunit H	protein_coding	0.35	5.95	0.000335873	0.000628978	0.46	0.000449455
SAR1B	ENSG00000152700	secretion associated Ras related GTPase 1B	protein_coding	0.35	7.06	0.0352023	0.0371865	0.18	0.331833
EPN1	ENSG00000063245	epsin 1	protein_coding	0.35	7.49	0.0107078	0.0183564	0.31	0.0320716
CDK17	ENSG00000059758	cyclin dependent kinase 17	protein_coding	0.35	5.23	0.0205665	0.0418084	0.24	0.131484
TRMT2A	ENSG00000099899	tRNA methyltransferase 2 homolog A	protein_coding	0.35	5.13	0.00221818	0.000207215	0.39	0.0041416
FAM53C	ENSG00000120709	family with sequence similarity 53 member C	protein_coding	0.35	6.09	8.3176e-05	5.96611e-05	0.53	2.49308e-05
RPL13A	ENSG00000142541	ribosomal protein L13a	protein_coding	0.35	11.32	0.0134362	0.00181931	0.36	0.01119
ALG14	ENSG00000172339	ALG14 UDP-N-acetylglucosaminyltransferase subunit	protein_coding	0.35	3.88	0.0167359	0.0191569	0.38	0.00643704
EMC10	ENSG00000161671	ER membrane protein complex subunit 10	protein_coding	0.35	7.72	0.00407149	0.00243316	0.37	0.00741405
ZSCAN22	ENSG00000182318	zinc finger and SCAN domain containing 22	protein_coding	0.35	2.66	0.000732944	7.02704e-05	0.48	0.000240953
NUP58	ENSG00000139496	nucleoporin 58	protein_coding	0.35	5.82	0.000795073	2.1425e-05	0.45	0.000566618
SNX8	ENSG00000106266	sorting nexin 8	protein_coding	0.36	4.43	0.00220309	0.000258085	0.49	0.000130248
GPAT4	ENSG00000158669	glycerol-3-phosphate acyltransferase 4	protein_coding	0.36	6.27	0.00785032	0.00613803	0.35	0.01364
PRKDC	ENSG00000253729	protein kinase, DNA-activated, catalytic subunit	protein_coding	0.36	7.52	0.0438795	0.0146191	0.31	0.0339903
ADCK1	ENSG00000063761	aarF domain containing kinase 1	protein_coding	0.36	3.57	0.00678013	0.000628978	0.31	0.0320716
MAVS	ENSG00000088888	mitochondrial antiviral signaling protein	protein_coding	0.36	7.01	0.00486664	0.000991802	0.36	0.0104711
SETD7	ENSG00000145391	SET domain containing 7, histone lysine methyltransferase	protein_coding	0.36	7.77	0.0153069	0.000673328	0.35	0.0150343
MRRF	ENSG00000148187	mitochondrial ribosome recycling factor	protein_coding	0.36	4.6	0.00408876	0.00105439	0.52	3.32546e-05
CDK12	ENSG00000167258	cyclin dependent kinase 12	protein_coding	0.36	6.07	0.00398472	0.00152142	0.39	0.00517162
MRPL37	ENSG00000116221	mitochondrial ribosomal protein L37	protein_coding	0.36	6.02	7.78516e-05	4.75591e-06	0.53	2.08635e-05
RPL18A	ENSG00000105640	ribosomal protein L18a	protein_coding	0.37	8.52	0.0188879	0.00678033	0.31	0.0370163
NME2	ENSG00000243678	NME/NM23 nucleoside diphosphate kinase 2	protein_coding	0.37	5.79	0.011201	0.00789261	0.46	0.000492392
TRIM3	ENSG00000110171	tripartite motif containing 3	protein_coding	0.37	4.57	0.000375363	3.62569e-05	0.54	1.21931e-05
SEH1L	ENSG00000085415	SEH1 like nucleoporin	protein_coding	0.37	5.28	0.000486387	3.08144e-07	0.56	4.74597e-06
DPM2	ENSG00000136908	dolichyl-phosphate mannosyltransferase subunit 2, regulatory	protein_coding	0.37	5.7	0.0140029	0.000550382	0.31	0.0349812
BAZ2A	ENSG00000076108	bromodomain adjacent to zinc finger domain 2A	protein_coding	0.37	6.99	0.00928697	0.0200069	0.31	0.0349812
SPATA2	ENSG00000158480	spermatogenesis associated 2	protein_coding	0.38	4.87	0.0012603	0.0017163	0.42	0.00164565
SELENON	ENSG00000162430	selenoprotein N	protein_coding	0.38	8.15	6.64388e-05	0.000165671	0.53	2.49308e-05
WBP11	ENSG00000084463	WW domain binding protein 11	protein_coding	0.38	6.95	0.000784478	0.0022933	0.43	0.00106879
AEN	ENSG00000181026	apoptosis enhancing nuclease	protein_coding	0.38	4.89	0.00991211	0.00499081	0.26	0.103257
AP2S1	ENSG00000042753	adaptor related protein complex 2 subunit sigma 1	protein_coding	0.39	6.34	0.0214685	0.0269539	0.25	0.115525
NOLC1	ENSG00000166197	nucleolar and coiled-body phosphoprotein 1	protein_coding	0.39	7	0.000159763	0.000192439	0.52	2.97314e-05
CASZ1	ENSG00000130940	castor zinc finger 1	protein_coding	0.39	5.94	0.00651379	0.00119295	0.39	0.00463331
TMEM11	ENSG00000178307	transmembrane protein 11	protein_coding	0.39	5.13	0.00190213	5.96611e-05	0.4	0.0035599
SSR1	ENSG00000124783	signal sequence receptor subunit 1	protein_coding	0.39	7.97	0.000112757	1.23999e-05	0.51	6.16314e-05
DOLK	ENSG00000175283	dolichol kinase	protein_coding	0.39	4.99	0.00121392	6.4725e-05	0.44	0.00102326
ANKRD17	ENSG00000132466	ankyrin repeat domain 17	protein_coding	0.39	7.1	0.00148872	0.000587634	0.4	0.00317193
CANX	ENSG00000127022	calnexin	protein_coding	0.39	10.11	0.000677499	8.46964e-06	0.45	0.000516065
DPP3	ENSG00000254986	dipeptidyl peptidase 3	protein_coding	0.39	5.59	0.000536328	4.65756e-05	0.48	0.000206283
PCNX3	ENSG00000197136	pecanex 3	protein_coding	0.39	6.17	0.000579386	5.04194e-05	0.49	0.000152188
CLCN5	ENSG00000171365	chloride voltage-gated channel 5	protein_coding	0.4	3.24	0.00810371	0.00472447	0.36	0.0108333
DCAF7	ENSG00000136485	DDB1 and CUL4 associated factor 7	protein_coding	0.4	7.4	0.000162391	0.000223079	0.47	0.000265288
SH3BP4	ENSG00000130147	SH3 domain binding protein 4	protein_coding	0.4	7.47	0.009849	0.00257471	0.42	0.00171864
MRPL42	ENSG00000198015	mitochondrial ribosomal protein L42	protein_coding	0.4	6.1	0.000487846	7.70176e-06	0.57	2.61355e-06
TRIM33	ENSG00000197323	tripartite motif containing 33	protein_coding	0.4	6.29	0.000658661	0.000929516	0.39	0.00498396
ORAI3	ENSG00000175938	ORAI calcium release-activated calcium modulator 3	protein_coding	0.4	4.94	0.0198027	0.0269539	0.23	0.155879
HM13	ENSG00000101294	histocompatibility minor 13	protein_coding	0.4	8.04	0.02239	0.00323605	0.44	0.000895433
ZDHHC18	ENSG00000204160	zinc finger DHHC-type palmitoyltransferase 18	protein_coding	0.4	5.19	8.7096e-05	4.2983e-05	0.55	9.00445e-06
ARHGDIA	ENSG00000141522	Rho GDP dissociation inhibitor alpha	protein_coding	0.41	7.92	2.44116e-05	1.23999e-05	0.53	1.85572e-05
LARP1	ENSG00000155506	La ribonucleoprotein 1, translational regulator	protein_coding	0.41	7.72	0.000108795	0.000240277	0.54	1.75221e-05
RPL7L1	ENSG00000146223	ribosomal protein L7 like 1	protein_coding	0.41	7.18	1.7642e-06	9.10646e-07	0.62	1.53163e-07
PDP2	ENSG00000172840	pyruvate dehyrogenase phosphatase catalytic subunit 2	protein_coding	0.41	4.48	0.00292429	0.000142294	0.42	0.00203407
MOV10	ENSG00000155363	Mov10 RISC complex RNA helicase	protein_coding	0.41	6.06	6.23214e-05	7.02704e-05	0.54	1.46248e-05
CCT5	ENSG00000150753	chaperonin containing TCP1 subunit 5	protein_coding	0.41	6.96	0.000185148	1.12712e-05	0.5	9.05969e-05
DCAF12	ENSG00000198876	DDB1 and CUL4 associated factor 12	protein_coding	0.42	6.07	1.17138e-05	3.08144e-07	0.59	1.06037e-06
PRR14L	ENSG00000183530	proline rich 14 like	protein_coding	0.42	5.61	0.00189631	0.000587634	0.39	0.00430865
ECPAS	ENSG00000136813	Ecm29 proteasome adaptor and scaffold	protein_coding	0.42	7.59	3.43571e-06	5.78647e-06	0.58	1.49334e-06
SOX12	ENSG00000177732	SRY-box transcription factor 12	protein_coding	0.43	5.12	0.0021932	0.00645785	0.43	0.00138889
EDC3	ENSG00000179151	enhancer of mRNA decapping 3	protein_coding	0.43	5.4	7.39662e-07	2.0163e-07	0.65	3.30066e-08
ADIPOR1	ENSG00000159346	adiponectin receptor 1	protein_coding	0.43	7.25	0.000540099	2.27033e-06	0.55	1.01733e-05
CNOT6	ENSG00000113300	CCR4-NOT transcription complex subunit 6	protein_coding	0.44	5.9	5.23088e-05	1.35633e-05	0.55	1.01733e-05
TMED9	ENSG00000184840	transmembrane p24 trafficking protein 9	protein_coding	0.44	7.97	0.00120314	0.000628978	0.42	0.00203407
UBE2O	ENSG00000175931	ubiquitin conjugating enzyme E2 O	protein_coding	0.44	5.67	3.49189e-07	2.53463e-06	0.73	5.615e-11
MARK2	ENSG00000072518	microtubule affinity regulating kinase 2	protein_coding	0.44	6.63	2.20138e-05	1.96007e-05	0.55	7.93946e-06
ASIC1	ENSG00000110881	acid sensing ion channel subunit 1	protein_coding	0.44	3.49	0.0361202	0.0167927	0.33	0.0232659
SLC5A6	ENSG00000138074	solute carrier family 5 member 6	protein_coding	0.45	4.83	0.000160633	5.04194e-05	0.52	3.52245e-05
KIF3B	ENSG00000101350	kinesin family member 3B	protein_coding	0.45	6.47	3.56575e-05	2.02182e-06	0.55	1.08015e-05
ATP6AP1	ENSG00000071553	ATPase H+ transporting accessory protein 1	protein_coding	0.45	8.28	0.000796627	0.000153928	0.44	0.000855764
DDOST	ENSG00000244038	dolichyl-diphosphooligosaccharide--protein glycosyltransferase non-catalytic subunit	protein_coding	0.45	8.18	8.63541e-05	0.000178993	0.55	8.45401e-06
POLR2H	ENSG00000163882	RNA polymerase II, I and III subunit H	protein_coding	0.45	5.12	0.000235741	3.06238e-05	0.51	6.52208e-05
SRSF6	ENSG00000124193	serine and arginine rich splicing factor 6	protein_coding	0.45	7.65	8.38783e-05	0.000121957	0.48	0.000177283
ARID1A	ENSG00000117713	AT-rich interaction domain 1A	protein_coding	0.45	7.28	0.00205126	0.00127185	0.4	0.0035599
CERS2	ENSG00000143418	ceramide synthase 2	protein_coding	0.45	7.32	1.2257e-05	9.34876e-06	0.59	9.88209e-07
SLC35B2	ENSG00000157593	solute carrier family 35 member B2	protein_coding	0.45	6.3	1.71215e-05	4.13969e-08	0.57	3.41444e-06
NFKB2	ENSG00000077150	nuclear factor kappa B subunit 2	protein_coding	0.46	5.74	0.00293736	0.000451634	0.39	0.00446675
CAPN15	ENSG00000103326	calpain 15	protein_coding	0.46	4.98	0.00082496	0.000368453	0.51	4.9437e-05
ARID5B	ENSG00000150347	AT-rich interaction domain 5B	protein_coding	0.46	7.25	0.00521919	0.000817229	0.4	0.00317193
ALG3	ENSG00000214160	ALG3 alpha-1,3- mannosyltransferase	protein_coding	0.46	5.52	0.00774563	0.00181931	0.38	0.00535947
FAM222B	ENSG00000173065	family with sequence similarity 222 member B	protein_coding	0.46	5.39	0.000207695	0.000421634	0.55	8.45401e-06
RPUSD1	ENSG00000007376	RNA pseudouridine synthase domain containing 1	protein_coding	0.46	4.39	0.000783785	0.000142294	0.45	0.000516065
RPL36	ENSG00000130255	ribosomal protein L36	protein_coding	0.46	9.01	0.0139055	0.0022933	0.34	0.0193046
MYDGF	ENSG00000074842	myeloid derived growth factor	protein_coding	0.46	6.97	0.00144644	0.000718092	0.43	0.00127175
SEC22C	ENSG00000093183	SEC22 homolog C, vesicle trafficking protein	protein_coding	0.47	6.87	4.82775e-05	0.000112656	0.52	3.1525e-05
POLR3E	ENSG00000058600	RNA polymerase III subunit E	protein_coding	0.47	5.77	5.29592e-08	5.70751e-07	0.69	2.21069e-09
ANKRD13B	ENSG00000198720	ankyrin repeat domain 13B	protein_coding	0.48	2.67	0.013781	0.0418084	0.33	0.0212086
WDR3	ENSG00000065183	WD repeat domain 3	protein_coding	0.48	5.3	8.71465e-05	8.23356e-05	0.55	9.58463e-06
REPIN1	ENSG00000214022	replication initiator 1	protein_coding	0.48	6.95	5.10955e-06	9.61399e-05	0.58	1.84325e-06
NOL6	ENSG00000165271	nucleolar protein 6	protein_coding	0.48	5.97	2.37305e-06	5.78647e-06	0.61	3.11666e-07
DIPK1B	ENSG00000165716	divergent protein kinase domain 1B	protein_coding	0.48	3.56	0.009442	0.000718092	0.37	0.00767762
RFFL	ENSG00000092871	ring finger and FYVE like domain containing E3 ubiquitin protein ligase	protein_coding	0.49	5.47	2.81636e-05	5.96611e-05	0.54	1.21931e-05
RERE	ENSG00000142599	arginine-glutamic acid dipeptide repeats	protein_coding	0.49	8.62	3.30265e-05	7.62747e-05	0.54	1.29956e-05
EIF4G1	ENSG00000114867	eukaryotic translation initiation factor 4 gamma 1	protein_coding	0.49	8.92	0.00016236	4.65756e-05	0.5	8.12124e-05
TLE3	ENSG00000140332	TLE family member 3, transcriptional corepressor	protein_coding	0.49	7.2	0.000101489	1.96007e-05	0.52	4.16055e-05
CCT3	ENSG00000163468	chaperonin containing TCP1 subunit 3	protein_coding	0.49	8.19	4.66703e-06	1.7717e-07	0.59	1.06037e-06
P3H4	ENSG00000141696	prolyl 3-hydroxylase family member 4 (inactive)	protein_coding	0.49	5.04	6.70896e-05	3.06238e-05	0.49	0.000152188
RPS6KA4	ENSG00000162302	ribosomal protein S6 kinase A4	protein_coding	0.5	5.14	8.01671e-06	6.4725e-05	0.53	1.85572e-05
PKN1	ENSG00000123143	protein kinase N1	protein_coding	0.5	7.32	0.000278604	0.000368453	0.53	2.2138e-05
MGAT4B	ENSG00000161013	alpha-1,3-mannosyl-glycoprotein 4-beta-N-acetylglucosaminyltransferase B	protein_coding	0.5	6.11	1.48273e-07	1.48971e-05	0.66	1.53586e-08
GNL2	ENSG00000134697	G protein nucleolar 2	protein_coding	0.5	5.75	1.92805e-06	3.56548e-08	0.63	7.45556e-08
E2F3	ENSG00000112242	E2F transcription factor 3	protein_coding	0.51	3.74	0.000545519	0.000587634	0.49	0.000152188
PABPC1	ENSG00000070756	poly(A) binding protein cytoplasmic 1	protein_coding	0.51	10.58	0.000175485	0.000258085	0.56	5.38461e-06
ADCY6	ENSG00000174233	adenylate cyclase 6	protein_coding	0.51	6.23	0.000659368	0.000240277	0.44	0.000895433
TIMM13	ENSG00000099800	translocase of inner mitochondrial membrane 13	protein_coding	0.51	5.95	0.000198146	7.00418e-06	0.5	0.000100402
TRUB2	ENSG00000167112	TruB pseudouridine synthase family member 2	protein_coding	0.51	5.63	5.27786e-08	9.10646e-07	0.69	2.43402e-09
SPATS2	ENSG00000123352	spermatogenesis associated serine rich 2	protein_coding	0.51	5.07	8.25601e-06	5.78647e-06	0.57	2.99831e-06
FBXO46	ENSG00000177051	F-box protein 46	protein_coding	0.51	4.7	2.5801e-05	1.48971e-05	0.55	9.58463e-06
SLC30A7	ENSG00000162695	solute carrier family 30 member 7	protein_coding	0.52	5.73	3.67324e-05	0.000165671	0.56	4.74597e-06
GOLPH3	ENSG00000113384	golgi phosphoprotein 3	protein_coding	0.52	8.12	0.00179409	1.96007e-05	0.59	1.20922e-06
ZNF664	ENSG00000179195	zinc finger protein 664	protein_coding	0.52	7.67	2.15073e-06	1.60999e-06	0.61	2.87782e-07
ANKRD52	ENSG00000139645	ankyrin repeat domain 52	protein_coding	0.53	6.12	0.000421101	3.33837e-05	0.42	0.00157495
PRRC2A	ENSG00000204469	proline rich coiled-coil 2A	protein_coding	0.53	8.86	1.13224e-06	3.86319e-06	0.64	3.86948e-08
LMO7	ENSG00000136153	LIM domain 7	protein_coding	0.53	6.54	0.00408067	0.0191569	0.31	0.0370163
OSBP2	ENSG00000184792	oxysterol binding protein 2	protein_coding	0.53	3.51	2.31881e-06	1.44185e-06	0.64	3.86948e-08
SLC52A2	ENSG00000185803	solute carrier family 52 member 2	protein_coding	0.53	5.52	0.00288182	0.00143505	0.45	0.000680102
LCOR	ENSG00000196233	ligand dependent nuclear receptor corepressor	protein_coding	0.53	4.98	0.000383027	0.000368453	0.5	0.000105737
SLC35E1	ENSG00000127526	solute carrier family 35 member E1	protein_coding	0.53	7.27	2.07377e-05	1.27503e-06	0.55	1.08015e-05
FKBP4	ENSG00000004478	FKBP prolyl isomerase 4	protein_coding	0.54	8.09	0.000215894	0.000277228	0.47	0.000292139
KMT2D	ENSG00000167548	lysine methyltransferase 2D	protein_coding	0.54	6.9	0.0038491	0.00243316	0.37	0.00715575
TOR2A	ENSG00000160404	torsin family 2 member A	protein_coding	0.54	4.02	2.99641e-05	4.75591e-06	0.56	6.12063e-06
HNRNPF	ENSG00000169813	heterogeneous nuclear ribonucleoprotein F	protein_coding	0.54	8.1	1.24448e-06	4.13969e-08	0.64	5.83096e-08
HIVEP1	ENSG00000095951	HIVEP zinc finger 1	protein_coding	0.55	5.54	0.00100204	0.00216808	0.42	0.00195299
B4GALT3	ENSG00000158850	beta-1,4-galactosyltransferase 3	protein_coding	0.55	5.78	3.25855e-06	2.27033e-06	0.6	4.85623e-07
CHPF	ENSG00000123989	chondroitin polymerizing factor	protein_coding	0.55	7.63	0.000744443	0.00381366	0.35	0.0123306
ZNF692	ENSG00000171163	zinc finger protein 692	protein_coding	0.55	4.69	0.0162433	0.0167927	0.23	0.146763
FAAH	ENSG00000117480	fatty acid amide hydrolase	protein_coding	0.56	7.11	0.0248399	0.00525639	0.31	0.038
TRAF7	ENSG00000131653	TNF receptor associated factor 7	protein_coding	0.56	6.37	1.30158e-08	1.029e-06	0.71	5.46399e-10
KIF5C	ENSG00000168280	kinesin family member 5C	protein_coding	0.56	7.46	0.0168171	0.00789261	0.37	0.00822707
TBC1D16	ENSG00000167291	TBC1 domain family member 16	protein_coding	0.56	7.09	0.00787674	0.00613803	0.34	0.0165217
NPTXR	ENSG00000221890	neuronal pentraxin receptor	protein_coding	0.57	6.26	0.00119356	0.00105439	0.39	0.00517162
IGF1R	ENSG00000140443	insulin like growth factor 1 receptor	protein_coding	0.57	7.7	0.00408314	0.0071382	0.36	0.0115672
HES4	ENSG00000188290	hes family bHLH transcription factor 4	protein_coding	0.58	2.95	0.0238282	0.00914711	0.34	0.0175789
ACSL3	ENSG00000123983	acyl-CoA synthetase long chain family member 3	protein_coding	0.58	8.39	0.0042716	0.000343955	0.38	0.00667083
PLXNA3	ENSG00000130827	plexin A3	protein_coding	0.58	5.9	3.77843e-05	1.63596e-05	0.53	2.80449e-05
AFDN	ENSG00000130396	afadin, adherens junction formation factor	protein_coding	0.58	7.67	0.00131898	0.00678033	0.38	0.00555594
PPIB	ENSG00000166794	peptidylprolyl isomerase B	protein_coding	0.59	8.45	0.000652393	3.95011e-05	0.52	3.93514e-05
STK35	ENSG00000125834	serine/threonine kinase 35	protein_coding	0.59	5.53	1.38185e-07	2.27033e-06	0.66	1.17447e-08
MAP3K9	ENSG00000006432	mitogen-activated protein kinase kinase kinase 9	protein_coding	0.6	3.54	0.000864181	0.000121957	0.47	0.000279073
SLC16A1	ENSG00000155380	solute carrier family 16 member 1	protein_coding	0.6	5.96	0.0083198	0.00323605	0.35	0.01364
SMOX	ENSG00000088826	spermine oxidase	protein_coding	0.6	5.2	0.00735249	0.0139518	0.42	0.00164565
DIAPH1	ENSG00000131504	diaphanous related formin 1	protein_coding	0.6	6.75	6.50408e-06	3.06238e-05	0.58	1.84325e-06
MAP3K21	ENSG00000143674	mitogen-activated protein kinase kinase kinase 21	protein_coding	0.6	3.08	0.0143489	0.00216808	0.41	0.00259788
EPB41	ENSG00000159023	erythrocyte membrane protein band 4,1	protein_coding	0.61	6.25	2.40498e-06	7.00418e-06	0.55	1.08015e-05
IMPDH1	ENSG00000106348	inosine monophosphate dehydrogenase 1	protein_coding	0.61	6.28	6.36972e-06	8.23356e-05	0.54	1.38479e-05
GRAMD1A	ENSG00000089351	GRAM domain containing 1A	protein_coding	0.61	6.5	1.0758e-06	7.02704e-05	0.63	1.31328e-07
YRDC	ENSG00000196449	yrdC N6-threonylcarbamoyltransferase domain containing	protein_coding	0.61	4.32	9.96481e-08	3.08144e-07	0.66	1.82326e-08
DOT1L	ENSG00000104885	DOT1 like histone lysine methyltransferase	protein_coding	0.61	4.58	3.67324e-05	4.2983e-05	0.52	2.97314e-05
DEGS1	ENSG00000143753	delta 4-desaturase, sphingolipid 1	protein_coding	0.62	7.57	0.00113236	0.00381366	0.34	0.0181594
CALR	ENSG00000179218	calreticulin	protein_coding	0.63	10.33	2.99566e-06	5.10665e-07	0.59	1.06037e-06
ATP13A2	ENSG00000159363	ATPase cation transporting 13A2	protein_coding	0.63	6.03	9.8176e-06	7.02704e-05	0.57	2.61355e-06
ATF5	ENSG00000169136	activating transcription factor 5	protein_coding	0.64	5.93	1.82273e-05	2.02182e-06	0.49	0.000137486
ABHD12	ENSG00000100997	abhydrolase domain containing 12, lysophospholipase	protein_coding	0.65	6.81	0.00171427	0.00789261	0.27	0.080786
ZBTB37	ENSG00000185278	zinc finger and BTB domain containing 37	protein_coding	0.65	4.43	4.167e-05	5.04194e-05	0.47	0.000336332
PNKD	ENSG00000127838	PNKD metallo-beta-lactamase domain containing	protein_coding	0.67	7.77	0.000143242	0.000451634	0.46	0.000470463
EEF2	ENSG00000167658	eukaryotic translation elongation factor 2	protein_coding	0.69	12.08	5.88977e-09	4.75591e-06	0.69	2.0139e-09
GTF3C1	ENSG00000077235	general transcription factor IIIC subunit 1	protein_coding	0.69	8.38	3.28257e-06	3.51703e-06	0.59	1.20922e-06
PRMT6	ENSG00000198890	protein arginine methyltransferase 6	protein_coding	0.69	5.17	1.86636e-07	2.27033e-06	0.64	4.57231e-08
RPS2	ENSG00000140988	ribosomal protein S2	protein_coding	0.7	10.06	0.00021515	1.23999e-05	0.46	0.000449455
PTTG1	ENSG00000164611	PTTG1 regulator of sister chromatid separation, securin	protein_coding	0.7	1.78	0.0179455	0.00143505	0.42	0.00151033
ENC1	ENSG00000171617	ectodermal-neural cortex 1	protein_coding	0.7	6.2	0.00229674	0.000991802	0.39	0.00399208
HYOU1	ENSG00000149428	hypoxia up-regulated 1	protein_coding	0.7	8.27	2.7063e-05	5.78647e-06	0.52	3.1525e-05
MAPK8IP2	ENSG00000008735	mitogen-activated protein kinase 8 interacting protein 2	protein_coding	0.7	3.72	0.00507992	0.00789261	0.4	0.00384397
METTL26	ENSG00000130731	methyltransferase like 26	protein_coding	0.7	5.6	0.00396499	0.000112656	0.3	0.0448381
DIP2A	ENSG00000160305	disco interacting protein 2 homolog A	protein_coding	0.71	6.14	2.08129e-06	1.96007e-05	0.55	7.43394e-06
TRAF4	ENSG00000076604	TNF receptor associated factor 4	protein_coding	0.72	6.27	1.83407e-05	2.83471e-06	0.61	3.89939e-07
LYPLA1	ENSG00000120992	lysophospholipase 1	protein_coding	0.73	6.59	3.7059e-05	1.03273e-05	0.55	1.08015e-05
DDX21	ENSG00000165732	DExD-box helicase 21	protein_coding	0.74	6.55	6.33966e-06	6.42498e-07	0.56	4.43413e-06
C16orf70	ENSG00000125149	chromosome 16 open reading frame 70	protein_coding	0.74	5.27	2.3934e-07	6.42498e-07	0.63	1.21209e-07
MAZ	ENSG00000103495	MYC associated zinc finger protein	protein_coding	0.75	6.59	8.64841e-06	1.35633e-05	0.55	7.43394e-06
FOXRED2	ENSG00000100350	FAD dependent oxidoreductase domain containing 2	protein_coding	0.75	5.78	1.41246e-07	5.10665e-07	0.66	1.82326e-08
H2BC18	ENSG00000203814	H2B clustered histone 18	protein_coding	0.77	1.98	0.0212831	0.00323605	0.35	0.0140902
NSF	ENSG00000073969	N-ethylmaleimide sensitive factor, vesicle fusing ATPase	protein_coding	0.77	6.05	1.35769e-09	3.34939e-08	0.71	4.46564e-10
OLR1	ENSG00000173391	oxidized low density lipoprotein receptor 1	protein_coding	0.78	1.6	0.00852768	0.0292706	0.3	0.0424496
PAICS	ENSG00000128050	phosphoribosylaminoimidazole carboxylase and phosphoribosylaminoimidazolesuccinocarboxamide synthase	protein_coding	0.78	7.12	3.03813e-08	7.44704e-08	0.68	3.82394e-09
TRIB3	ENSG00000101255	tribbles pseudokinase 3	protein_coding	0.78	4.95	4.33021e-06	5.28358e-06	0.6	5.62755e-07
SYNGR2	ENSG00000108639	synaptogyrin 2	protein_coding	0.79	8.85	3.10979e-07	2.6609e-07	0.64	4.57231e-08
MFSD12	ENSG00000161091	major facilitator superfamily domain containing 12	protein_coding	0.79	5.59	5.36094e-07	3.51703e-06	0.63	9.46683e-08
SRM	ENSG00000116649	spermidine synthase	protein_coding	0.8	6.09	6.40151e-06	4.75591e-06	0.57	2.79726e-06
H2BC12	ENSG00000197903	H2B clustered histone 12	protein_coding	0.8	5.46	0.000464553	8.9001e-05	0.53	2.80449e-05
PKMYT1	ENSG00000127564	protein kinase, membrane associated tyrosine/threonine 1	protein_coding	0.8	1.5	0.021533	0.00447755	0.51	6.52208e-05
P4HB	ENSG00000185624	prolyl 4-hydroxylase subunit beta	protein_coding	0.8	10.78	1.10175e-07	1.029e-06	0.67	7.07481e-09
TTLL12	ENSG00000100304	tubulin tyrosine ligase like 12	protein_coding	0.82	6.9	3.40156e-07	3.12501e-06	0.63	8.70134e-08
SAMD10	ENSG00000130590	sterile alpha motif domain containing 10	protein_coding	0.82	3.73	1.27752e-06	5.78647e-06	0.65	2.79585e-08
MYC	ENSG00000136997	MYC proto-oncogene, bHLH transcription factor	protein_coding	0.84	6.7	0.00337395	0.00119295	0.49	0.000160171
CLSPN	ENSG00000092853	claspin	protein_coding	0.88	0.13	0.0152758	0.00499081	0.34	0.0165217
FAM83H	ENSG00000180921	family with sequence similarity 83 member H	protein_coding	0.88	6.39	5.78692e-06	5.04194e-05	0.59	9.88209e-07
TBC1D4	ENSG00000136111	TBC1 domain family member 4	protein_coding	0.88	6.55	0.000195656	1.63596e-05	0.54	1.55462e-05
CBX2	ENSG00000173894	chromobox 2	protein_coding	0.88	1.76	0.00736903	0.0071382	0.45	0.000621082
ARHGAP32	ENSG00000134909	Rho GTPase activating protein 32	protein_coding	0.91	6.09	4.52052e-07	1.79854e-05	0.64	4.18998e-08
HASPIN	ENSG00000177602	histone H3 associated protein kinase	protein_coding	0.92	-1.17	0.00427118	8.9001e-05	0.47	0.000352934
TET3	ENSG00000187605	tet methylcytosine dioxygenase 3	protein_coding	0.94	5.11	9.32264e-07	7.00418e-06	0.59	1.06037e-06
TRAM2	ENSG00000065308	translocation associated membrane protein 2	protein_coding	0.95	5.12	2.03572e-07	4.58686e-07	0.62	1.66522e-07
BICDL1	ENSG00000135127	BICD family like cargo adaptor 1	protein_coding	0.97	3.75	7.53386e-06	7.00418e-06	0.65	3.03135e-08
C19orf48	ENSG00000167747	chromosome 19 open reading frame 48	transcribed_unitary_pseudogene	0.97	7.85	0.000457862	2.53463e-06	0.54	1.38479e-05
H1-2	ENSG00000187837	H1,2 linker histone, cluster member	protein_coding	0.98	7.29	0.00315279	0.00914711	0.32	0.0311463
NEDD4L	ENSG00000049759	NEDD4 like E3 ubiquitin protein ligase	protein_coding	0.99	8.67	0.000190424	1.35633e-05	0.55	1.01733e-05
CELSR3	ENSG00000008300	cadherin EGF LAG seven-pass G-type receptor 3	protein_coding	1.02	2.15	0.00284076	8.9001e-05	0.53	2.2138e-05
ZBED9	ENSG00000232040	zinc finger BED-type containing 9	protein_coding	1.02	3.83	0.000536317	0.00257471	0.47	0.000336332
CBX8	ENSG00000141570	chromobox 8	protein_coding	1.04	3.19	1.12209e-08	3.99678e-07	0.69	1.26285e-09
MATR3	ENSG00000280987	matrin 3 [Source:NCBI gene (formerly Entrezgene)	protein_coding	1.08	0.88	4.88627e-07	1.35633e-05	0.64	4.97552e-08
HIPK2	ENSG00000064393	homeodomain interacting protein kinase 2	protein_coding	1.09	7.87	2.74681e-07	4.27225e-06	0.58	1.97956e-06
B4GALNT4	ENSG00000182272	beta-1,4-N-acetyl-galactosaminyltransferase 4	protein_coding	1.13	3.63	4.10492e-05	0.000587634	0.52	3.71881e-05
MEX3A	ENSG00000254726	mex-3 RNA binding family member A	protein_coding	1.14	3.68	0.00514605	0.00447755	0.37	0.00881069
GPRIN1	ENSG00000169258	G protein regulated inducer of neurite outgrowth 1	protein_coding	1.16	0.85	1.01082e-06	3.12501e-06	0.66	1.07763e-08
WDR93	ENSG00000140527	WD repeat domain 93	protein_coding	1.17	1.68	0.00038562	0.00828476	0.33	0.0246928
NUP210	ENSG00000132182	nucleoporin 210	protein_coding	1.22	6.1	1.93714e-09	9.10646e-07	0.75	1.04307e-11
SBK1	ENSG00000188322	SH3 domain binding kinase 1	protein_coding	1.24	4.36	7.74988e-08	4.75591e-06	0.71	2.71007e-10
FOXM1	ENSG00000111206	forkhead box M1	protein_coding	1.24	2.49	0.000252048	7.62747e-05	0.62	1.53163e-07
ARFGEF3	ENSG00000112379	ARFGEF family member 3	protein_coding	1.24	8.28	5.10762e-07	5.10665e-07	0.66	1.53586e-08
NOL4	ENSG00000101746	nucleolar protein 4	protein_coding	1.29	1.69	0.0156862	0.00447755	0.42	0.00157495
ESRP2	ENSG00000103067	epithelial splicing regulatory protein 2	protein_coding	1.29	6.15	3.87904e-10	6.29031e-08	0.78	9.00628e-13
RTN4RL2	ENSG00000186907	reticulon 4 receptor like 2	protein_coding	1.29	1.55	9.89947e-08	5.70751e-07	0.68	4.22041e-09
GJB1	ENSG00000169562	gap junction protein beta 1	protein_coding	1.34	6.22	1.08556e-05	5.70751e-07	0.63	1.21209e-07
PODXL2	ENSG00000114631	podocalyxin like 2	protein_coding	1.35	6.67	4.62448e-06	4.58686e-07	0.66	1.82326e-08
SAMD5	ENSG00000203727	sterile alpha motif domain containing 5	protein_coding	1.4	4.39	6.15956e-05	1.63596e-05	0.68	5.0639e-09
IQGAP3	ENSG00000183856	IQ motif containing GTPase activating protein 3	protein_coding	1.42	1.69	0.000168279	0.000153928	0.59	1.06037e-06
RRM2	ENSG00000171848	ribonucleotide reductase regulatory subunit M2	protein_coding	1.47	3.04	0.00112286	6.38573e-06	0.63	8.70134e-08
FASN	ENSG00000169710	fatty acid synthase	protein_coding	1.47	10.28	2.16253e-06	2.34632e-05	0.66	1.67621e-08
KIF18B	ENSG00000186185	kinesin family member 18B	protein_coding	1.52	0.35	0.000397293	0.000343955	0.5	8.58552e-05
TRIB1	ENSG00000173334	tribbles pseudokinase 1	protein_coding	1.6	7.81	6.47082e-06	9.10646e-07	0.61	3.89939e-07
MYBL2	ENSG00000101057	MYB proto-oncogene like 2	protein_coding	1.62	2.57	0.00180905	0.000421634	0.65	3.30066e-08
COL12A1	ENSG00000111799	collagen type XII alpha 1 chain	protein_coding	1.76	7.57	2.39288e-05	0.00381366	0.31	0.038
MON1B	ENSG00000103111	MON1 homolog B, secretory trafficking associated	protein_coding	2.39	8.06	1.76094e-08	7.00418e-06	0.48	0.000217954
SHISA8	ENSG00000234965	shisa family member 8	protein_coding	2.88	-0.86	3.46843e-07	5.04194e-05	0.45	0.000541144

## Sheet: miR570_3p
Gene name	Gene id	Description	Biotype	LogFC	LogCPM	QLF_FDR	MW_FDR	Spearman_correlation_coef	Spearman_correlation_FDR
ATP6V1G3	ENSG00000151418	ATPase H+ transporting V1 subunit G3	protein_coding	-3.11	-2.02	2.31877e-06	5.47903e-05	-0.54	1.43837e-05
IGDCC4	ENSG00000103742	immunoglobulin superfamily DCC subclass member 4	protein_coding	-1.84	0.89	2.53821e-05	0.000153928	-0.44	0.00102326
SMTN	ENSG00000183963	smoothelin	protein_coding	-1.53	8.18	3.76858e-08	2.02182e-06	-0.66	1.41935e-08
SAMD12	ENSG00000177570	sterile alpha motif domain containing 12	protein_coding	-1.52	4.05	5.62246e-07	6.29031e-08	-0.63	8.70134e-08
SRRM4	ENSG00000139767	serine/arginine repetitive matrix 4	protein_coding	-1.44	-1.65	0.000723111	4.65756e-05	-0.53	2.08635e-05
CAV2	ENSG00000105971	caveolin 2	protein_coding	-1.43	5.32	2.12151e-11	4.77598e-08	-0.74	2.12017e-11
WSCD2	ENSG00000075035	WSC domain containing 2	protein_coding	-1.24	3.51	0.00030327	0.000297935	-0.49	0.0001115
SVOP	ENSG00000166111	SV2 related protein	protein_coding	-1.13	-2.54	0.00619869	0.000192439	-0.59	1.20922e-06
PDE5A	ENSG00000138735	phosphodiesterase 5A	protein_coding	-1.09	7.08	0.000462222	6.4725e-05	-0.48	0.000229242
KCNB1	ENSG00000158445	potassium voltage-gated channel subfamily B member 1	protein_coding	-1.06	3.67	0.000706086	0.000871419	-0.45	0.000650583
ATP1B1	ENSG00000143153	ATPase Na+/K+ transporting subunit beta 1	protein_coding	-1.04	6.64	3.4029e-06	5.28358e-06	-0.59	1.39099e-06
GRK5	ENSG00000198873	G protein-coupled receptor kinase 5	protein_coding	-1	3.9	2.00727e-06	9.34876e-06	-0.5	8.12124e-05
ZNF99	ENSG00000213973	zinc finger protein 99	protein_coding	-0.92	-2.77	0.0378916	0.00272713	-0.32	0.0254696
TMEM47	ENSG00000147027	transmembrane protein 47	protein_coding	-0.85	6.14	1.9088e-05	1.48971e-05	-0.52	3.52245e-05
TEAD1	ENSG00000187079	TEA domain transcription factor 1	protein_coding	-0.79	6.45	2.65695e-05	4.2983e-05	-0.5	9.05969e-05
TMEM154	ENSG00000170006	transmembrane protein 154	protein_coding	-0.73	2.55	0.00221696	1.12712e-05	-0.47	0.000336332
DENND2C	ENSG00000175984	DENN domain containing 2C	protein_coding	-0.7	2.44	0.000145306	4.2983e-05	-0.49	0.000145098
MYADM	ENSG00000179820	myeloid associated differentiation marker	protein_coding	-0.65	7.8	0.00288464	0.00152142	-0.37	0.00794114
KLF10	ENSG00000155090	Kruppel like factor 10	protein_coding	-0.64	6.16	0.0486685	0.0228166	-0.3	0.0448381
CD274	ENSG00000120217	CD274 molecule	protein_coding	-0.63	1.36	0.00228666	1.03273e-05	-0.42	0.00187126
ADAM22	ENSG00000008277	ADAM metallopeptidase domain 22	protein_coding	-0.62	5.11	0.0345159	0.0100811	-0.3	0.0401839
ZFAND5	ENSG00000107372	zinc finger AN1-type containing 5	protein_coding	-0.62	7.65	6.11936e-07	8.19343e-07	-0.59	8.60895e-07
TGFBR2	ENSG00000163513	transforming growth factor beta receptor 2	protein_coding	-0.58	6.73	0.00352022	0.000343955	-0.37	0.00767762
CRTAP	ENSG00000170275	cartilage associated protein	protein_coding	-0.55	7.88	2.66143e-06	1.44185e-06	-0.57	3.20952e-06
SLC43A3	ENSG00000134802	solute carrier family 43 member 3	protein_coding	-0.53	3	0.00343868	0.00401963	-0.37	0.00881069
P2RX7	ENSG00000089041	purinergic receptor P2X 7	protein_coding	-0.46	2.33	0.0402884	0.0100811	-0.25	0.110431
ZFP36L2	ENSG00000152518	ZFP36 ring finger protein like 2	protein_coding	-0.45	8.05	0.00685956	0.00914711	-0.33	0.0232659
PPTC7	ENSG00000196850	protein phosphatase targeting COQ7	protein_coding	-0.44	5.16	4.14962e-05	1.96007e-05	-0.57	2.79726e-06
CPNE8	ENSG00000139117	copine 8	protein_coding	-0.41	2.65	0.0421731	0.0167927	-0.33	0.0205721
CDKN2AIP	ENSG00000168564	CDKN2A interacting protein	protein_coding	-0.39	4.79	5.31104e-05	2.83471e-06	-0.59	1.13162e-06
CCDC115	ENSG00000136710	coiled-coil domain containing 115	protein_coding	-0.39	5.65	0.000130521	1.15271e-06	-0.57	3.91296e-06
CLUAP1	ENSG00000103351	clusterin associated protein 1	protein_coding	-0.36	4.88	1.81606e-05	1.60999e-06	-0.58	1.49334e-06
PRDX5	ENSG00000126432	peroxiredoxin 5	protein_coding	-0.36	7.42	0.0195188	0.0105588	-0.33	0.0212086
KLHL15	ENSG00000174010	kelch like family member 15	protein_coding	-0.35	4.34	0.048663	0.0167927	-0.26	0.0943614
ARPC2	ENSG00000163466	actin related protein 2/3 complex subunit 2	protein_coding	-0.35	7.41	0.000168218	4.2983e-05	-0.53	1.85572e-05
FUT10	ENSG00000172728	fucosyltransferase 10	protein_coding	-0.34	2.73	0.0191266	0.000871419	-0.36	0.0104711
MORF4L1	ENSG00000185787	mortality factor 4 like 1	protein_coding	-0.33	7.7	0.000793804	0.000673328	-0.5	0.000105737
EEF2K	ENSG00000103319	eukaryotic elongation factor 2 kinase	protein_coding	-0.3	6.73	0.0313522	0.00472447	-0.33	0.0218743
GNA13	ENSG00000120063	G protein subunit alpha 13	protein_coding	-0.27	5.99	0.028949	0.00645785	-0.28	0.069672
OTUD1	ENSG00000165312	OTU deubiquitinase 1	protein_coding	-0.27	4.11	0.00500571	0.000343955	-0.44	0.000979719
RMND5A	ENSG00000153561	required for meiotic nuclear division 5 homolog A	protein_coding	0.22	6.45	0.031486	0.0146191	0.35	0.0150343
XIAP	ENSG00000101966	X-linked inhibitor of apoptosis	protein_coding	0.22	6.52	0.02008	0.00678033	0.33	0.0239471
MTA2	ENSG00000149480	metastasis associated 1 family member 2	protein_coding	0.22	6.72	0.0142643	0.00112039	0.4	0.00370379
HNRNPA2B1	ENSG00000122566	heterogeneous nuclear ribonucleoprotein A2/B1	protein_coding	0.23	9.2	0.0411761	0.000718092	0.44	0.000895433
ADNP2	ENSG00000101544	ADNP homeobox 2	protein_coding	0.23	5	0.0239268	0.00645785	0.3	0.0484832
NUFIP2	ENSG00000108256	nuclear FMR1 interacting protein 2	protein_coding	0.24	6.58	0.0347971	0.030453	0.28	0.0645645
CELF1	ENSG00000149187	CUGBP Elav-like family member 1	protein_coding	0.26	6.88	0.00237165	0.000297935	0.49	0.000152188
PSME3	ENSG00000131467	proteasome activator subunit 3	protein_coding	0.27	6.61	0.00122697	5.04194e-05	0.49	0.000152188
PPIA	ENSG00000196262	peptidylprolyl isomerase A	protein_coding	0.29	7.91	0.0338601	0.00257471	0.37	0.00881069
ARHGAP18	ENSG00000146376	Rho GTPase activating protein 18	protein_coding	0.3	5.23	0.0366473	0.0280478	0.28	0.0679462
RAD23B	ENSG00000119318	RAD23 homolog B, nucleotide excision repair protein	protein_coding	0.31	7.78	0.000678621	0.000767531	0.53	2.08635e-05
PDIK1L	ENSG00000175087	PDLIM1 interacting kinase 1 like	protein_coding	0.34	4.14	0.00775641	0.000319697	0.34	0.0181594
ZBTB18	ENSG00000179456	zinc finger and BTB domain containing 18	protein_coding	0.35	5.36	0.0224448	0.0071382	0.49	0.000160171
ARL6IP1	ENSG00000170540	ADP ribosylation factor like GTPase 6 interacting protein 1	protein_coding	0.35	7.53	0.0159266	0.00243316	0.37	0.00794114
CHSY1	ENSG00000131873	chondroitin sulfate synthase 1	protein_coding	0.36	6.17	0.000423587	0.000368453	0.49	0.000137486
GPAT4	ENSG00000158669	glycerol-3-phosphate acyltransferase 4	protein_coding	0.36	6.27	0.00785032	0.00613803	0.35	0.01364
STRBP	ENSG00000165209	spermatid perinuclear RNA binding protein	protein_coding	0.37	5.35	0.0010355	0.000112656	0.51	4.66114e-05
ARHGAP29	ENSG00000137962	Rho GTPase activating protein 29	protein_coding	0.37	6.27	0.017049	0.00613803	0.33	0.0225874
LIMD1	ENSG00000144791	LIM domains containing 1	protein_coding	0.37	5.85	0.0015464	0.000277228	0.42	0.00203407
ABL2	ENSG00000143322	ABL proto-oncogene 2, non-receptor tyrosine kinase	protein_coding	0.39	5.04	0.000982641	0.000240277	0.49	0.000123889
WARS2	ENSG00000116874	tryptophanyl tRNA synthetase 2, mitochondrial	protein_coding	0.39	4.45	0.00105542	3.62569e-05	0.46	0.000388637
BTD	ENSG00000169814	biotinidase	protein_coding	0.39	5.45	0.00454979	0.00243316	0.39	0.0041416
CANX	ENSG00000127022	calnexin	protein_coding	0.39	10.11	0.000677499	8.46964e-06	0.45	0.000516065
SSR1	ENSG00000124783	signal sequence receptor subunit 1	protein_coding	0.39	7.97	0.000112757	1.23999e-05	0.51	6.16314e-05
VPS26B	ENSG00000151502	VPS26, retromer complex component B	protein_coding	0.43	6.8	4.24341e-05	0.000394797	0.52	3.32546e-05
GALNT1	ENSG00000141429	polypeptide N-acetylgalactosaminyltransferase 1	protein_coding	0.43	6.76	0.00097179	1.63596e-05	0.44	0.000895433
BACH1	ENSG00000156273	BTB domain and CNC homolog 1	protein_coding	0.44	5.94	0.00341978	0.000673328	0.38	0.00691133
MYDGF	ENSG00000074842	myeloid derived growth factor	protein_coding	0.46	6.97	0.00144644	0.000718092	0.43	0.00127175
CEMIP2	ENSG00000135048	cell migration inducing hyaluronidase 2	protein_coding	0.5	5.82	0.021988	0.0105588	0.36	0.0101249
APLP2	ENSG00000084234	amyloid beta precursor like protein 2	protein_coding	0.5	10.29	4.9492e-05	5.47903e-05	0.53	2.49308e-05
SMARCC1	ENSG00000173473	SWI/SNF related, matrix associated, actin dependent regulator of chromatin subfamily c member 1	protein_coding	0.51	7.64	2.84451e-05	1.12712e-05	0.52	3.93514e-05
PTPRJ	ENSG00000149177	protein tyrosine phosphatase receptor type J	protein_coding	0.53	6.23	0.000223116	0.000192439	0.48	0.000206283
HNRNPF	ENSG00000169813	heterogeneous nuclear ribonucleoprotein F	protein_coding	0.54	8.1	1.24448e-06	4.13969e-08	0.64	5.83096e-08
IGF1R	ENSG00000140443	insulin like growth factor 1 receptor	protein_coding	0.57	7.7	0.00408314	0.0071382	0.36	0.0115672
SOAT1	ENSG00000057252	sterol O-acyltransferase 1	protein_coding	0.57	7.38	0.000365454	3.62569e-05	0.5	0.000100402
ZNF736	ENSG00000234444	zinc finger protein 736	protein_coding	0.58	3.85	0.000180987	0.000142294	0.47	0.000265288
CDK6	ENSG00000105810	cyclin dependent kinase 6	protein_coding	0.58	5.57	0.0221944	0.00914711	0.33	0.0212086
DDAH1	ENSG00000153904	dimethylarginine dimethylaminohydrolase 1	protein_coding	0.74	7.38	2.16974e-06	1.60999e-06	0.6	6.9617e-07
TRIP13	ENSG00000071539	thyroid hormone receptor interactor 13	protein_coding	0.76	1.61	0.00361427	0.000767531	0.64	6.88094e-08
CCNG2	ENSG00000138764	cyclin G2	protein_coding	0.81	7.42	1.28785e-05	2.83471e-06	0.53	2.34862e-05
PSAT1	ENSG00000135069	phosphoserine aminotransferase 1	protein_coding	0.89	5.05	3.52554e-05	5.28358e-06	0.53	2.2138e-05
H2BC8	ENSG00000273802	H2B clustered histone 8	protein_coding	1.16	3.39	0.00164534	0.000817229	0.48	0.000240953
TOP2A	ENSG00000131747	DNA topoisomerase II alpha	protein_coding	1.42	4.15	0.00135715	0.000131957	0.52	3.71881e-05
F2RL2	ENSG00000164220	coagulation factor II thrombin receptor like 2	protein_coding	1.68	0.18	6.94286e-05	0.000142294	0.53	1.96819e-05
GMNC	ENSG00000205835	geminin coiled-coil domain containing	protein_coding	2.31	1.24	4.9776e-05	0.00613803	0.4	0.00317193
SLIT1	ENSG00000187122	slit guidance ligand 1	protein_coding	2.85	3.67	2.53954e-09	7.44704e-08	0.74	4.65533e-11

## Sheet: miR616_3p
Gene name	Gene id	Description	Biotype	LogFC	LogCPM	QLF_FDR	MW_FDR	Spearman_correlation_coef	Spearman_correlation_FDR
MRO	ENSG00000134042	maestro	protein_coding	-3.04	1.04	4.46506e-08	8.9001e-05	-0.49	0.0001115
PCSK9	ENSG00000169174	proprotein convertase subtilisin/kexin type 9	protein_coding	-2.04	-1.02	2.18319e-05	5.04194e-05	-0.51	4.66114e-05
PON1	ENSG00000005421	paraoxonase 1	protein_coding	-1.89	-0.28	0.00559961	0.0257577	-0.22	0.197268
NT5E	ENSG00000135318	5'-nucleotidase ecto	protein_coding	-1.23	4.4	8.1262e-08	6.42498e-07	-0.64	4.18998e-08
CPED1	ENSG00000106034	cadherin like and PC-esterase domain containing 1	protein_coding	-1.22	5.84	1.80816e-05	1.96007e-05	-0.51	6.52208e-05
DPYSL3	ENSG00000113657	dihydropyrimidinase like 3	protein_coding	-1.21	8.5	4.15135e-07	9.34876e-06	-0.57	3.65758e-06
CLIP4	ENSG00000115295	CAP-Gly domain containing linker protein family member 4	protein_coding	-1.19	4.97	2.56713e-08	7.44704e-08	-0.65	2.19075e-08
TOR4A	ENSG00000198113	torsin family 4 member A	protein_coding	-1.17	2.38	6.43788e-05	0.0017163	-0.33	0.0246928
MAP1B	ENSG00000131711	microtubule associated protein 1B	protein_coding	-1.11	7.58	0.0001397	0.000192439	-0.45	0.000566618
SLFN12	ENSG00000172123	schlafen family member 12	protein_coding	-1	1.44	0.000170533	7.2264e-07	-0.51	6.16314e-05
LGALS3BP	ENSG00000108679	galectin 3 binding protein	protein_coding	-0.97	8.52	8.31871e-06	9.34876e-06	-0.64	5.39976e-08
GPIHBP1	ENSG00000277494	glycosylphosphatidylinositol anchored high density lipoprotein binding protein 1	protein_coding	-0.82	0.93	0.00672973	0.00323605	-0.35	0.01364
TRIP10	ENSG00000125733	thyroid hormone receptor interactor 10	protein_coding	-0.78	5.59	3.45124e-08	8.52853e-08	-0.7	7.95318e-10
PCDH18	ENSG00000189184	protocadherin 18	protein_coding	-0.78	4.93	0.00374228	0.00105439	-0.38	0.00620283
DPYD	ENSG00000188641	dihydropyrimidine dehydrogenase	protein_coding	-0.73	4.94	0.0102606	0.000817229	-0.4	0.00384397
PFKFB3	ENSG00000170525	6-phosphofructo-2-kinase/fructose-2,6-biphosphatase 3	protein_coding	-0.73	5.54	0.000951041	0.000673328	-0.41	0.00249509
ANTXR2	ENSG00000163297	ANTXR cell adhesion molecule 2	protein_coding	-0.71	8.12	0.00200559	0.000991802	-0.44	0.00102326
MSN	ENSG00000147065	moesin	protein_coding	-0.69	7.76	1.80896e-05	2.34632e-05	-0.47	0.000279073
ACTB	ENSG00000075624	actin beta	protein_coding	-0.63	12.05	1.52605e-05	1.03273e-05	-0.49	0.000152188
ENPP2	ENSG00000136960	ectonucleotide pyrophosphatase/phosphodiesterase 2	protein_coding	-0.61	5.54	0.0480409	0.00499081	-0.27	0.080786
IVNS1ABP	ENSG00000116679	influenza virus NS1A binding protein	protein_coding	-0.51	6.74	0.00105064	0.0121378	-0.34	0.0193046
RORA	ENSG00000069667	RAR related orphan receptor A	protein_coding	-0.49	4.43	0.00592457	0.00288559	-0.29	0.049806
ASAP1	ENSG00000153317	ArfGAP with SH3 domain, ankyrin repeat and PH domain 1	protein_coding	-0.48	5.05	0.00455124	0.00613803	-0.31	0.0330172
RBM43	ENSG00000184898	RNA binding motif protein 43	protein_coding	-0.46	4.07	0.00382891	0.000121957	-0.39	0.00498396
ELF1	ENSG00000120690	E74 like ETS transcription factor 1	protein_coding	-0.36	6.25	0.00677857	0.00135209	-0.42	0.00179426
MORF4L1	ENSG00000185787	mortality factor 4 like 1	protein_coding	-0.33	7.7	0.000793804	0.000673328	-0.5	0.000105737
PTP4A2	ENSG00000184007	protein tyrosine phosphatase 4A2	protein_coding	-0.31	7.53	0.000251805	1.35633e-05	-0.52	4.16055e-05
PTPN11	ENSG00000179295	protein tyrosine phosphatase non-receptor type 11	protein_coding	-0.28	7.17	0.0395956	0.0133182	-0.28	0.0645645
PAFAH1B1	ENSG00000007168	platelet activating factor acetylhydrolase 1b regulatory subunit 1	protein_coding	-0.27	6.97	0.00904612	0.000421634	-0.36	0.01119
FOXJ2	ENSG00000065970	forkhead box J2	protein_coding	-0.27	5.42	0.00937076	0.00193142	-0.38	0.00620283
DDX24	ENSG00000089737	DEAD-box helicase 24	protein_coding	-0.25	7.66	0.00881712	0.00401963	-0.36	0.0101249
H3-3B	ENSG00000132475	H3,3 histone B	protein_coding	-0.24	9.07	0.00161225	0.000421634	-0.46	0.000449455
COPS8	ENSG00000198612	COP9 signalosome subunit 8	protein_coding	-0.22	5.54	0.0294004	0.0269539	-0.32	0.0277311
AEBP2	ENSG00000139154	AE binding protein 2	protein_coding	-0.22	5.27	0.0101862	0.00525639	-0.41	0.00230058
AKIRIN2	ENSG00000135334	akirin 2	protein_coding	-0.22	4.53	0.0190448	0.00828476	-0.33	0.0246928
XIAP	ENSG00000101966	X-linked inhibitor of apoptosis	protein_coding	0.22	6.52	0.02008	0.00678033	0.33	0.0239471
SAP130	ENSG00000136715	Sin3A associated protein 130	protein_coding	0.24	5.2	0.0259173	0.00424223	0.35	0.0145503
METTL9	ENSG00000197006	methyltransferase like 9	protein_coding	0.27	6.93	0.0208456	0.00914711	0.37	0.00715575
LMAN1	ENSG00000074695	lectin, mannose binding 1	protein_coding	0.29	8.06	0.0424253	0.0228166	0.26	0.0943614
MIEF1	ENSG00000100335	mitochondrial elongation factor 1	protein_coding	0.3	5.71	0.00127826	4.2983e-05	0.45	0.000593332
ARHGAP18	ENSG00000146376	Rho GTPase activating protein 18	protein_coding	0.3	5.23	0.0366473	0.0280478	0.28	0.0679462
POU2F1	ENSG00000143190	POU class 2 homeobox 1	protein_coding	0.31	5.26	0.0185408	0.0105588	0.33	0.0246928
TMEM123	ENSG00000152558	transmembrane protein 123	protein_coding	0.31	8.4	0.046975	0.0228166	0.28	0.0662622
FRYL	ENSG00000075539	FRY like transcription coactivator	protein_coding	0.31	5.93	0.0301252	0.00381366	0.3	0.0412351
AFF1	ENSG00000172493	AF4/FMR2 family member 1	protein_coding	0.33	7.18	0.0216214	0.00828476	0.28	0.0679462
MTHFD1	ENSG00000100714	methylenetetrahydrofolate dehydrogenase, cyclohydrolase and formyltetrahydrofolate synthetase 1	protein_coding	0.37	5.88	4.45956e-05	1.79854e-05	0.56	5.07086e-06
LPAR2	ENSG00000064547	lysophosphatidic acid receptor 2	protein_coding	0.38	4.69	0.0371457	0.016041	0.3	0.0401839
HSPA5	ENSG00000044574	heat shock protein family A (Hsp70) member 5	protein_coding	0.38	9.76	0.0187644	0.0017163	0.39	0.0041416
ABL2	ENSG00000143322	ABL proto-oncogene 2, non-receptor tyrosine kinase	protein_coding	0.39	5.04	0.000982641	0.000240277	0.49	0.000123889
LARP1	ENSG00000155506	La ribonucleoprotein 1, translational regulator	protein_coding	0.41	7.72	0.000108795	0.000240277	0.54	1.75221e-05
MMACHC	ENSG00000132763	metabolism of cobalamin associated C	protein_coding	0.41	3.73	0.000289683	0.000297935	0.48	0.000206283
BSG	ENSG00000172270	basigin (Ok blood group)	protein_coding	0.42	9.36	0.0105551	0.00552537	0.27	0.0859594
FKTN	ENSG00000106692	fukutin	protein_coding	0.43	4.66	0.000160633	5.04194e-05	0.47	0.00030632
COG5	ENSG00000164597	component of oligomeric golgi complex 5	protein_coding	0.44	6.37	0.00573226	0.00204666	0.37	0.00881069
CNNM2	ENSG00000148842	cyclin and CBS domain divalent metal cation transport mediator 2	protein_coding	0.45	4.37	0.000528867	0.00112039	0.44	0.000746307
ZNF281	ENSG00000162702	zinc finger protein 281	protein_coding	0.46	4.16	0.00221357	6.4725e-05	0.46	0.000470463
KDELR2	ENSG00000136240	KDEL endoplasmic reticulum protein retention receptor 2	protein_coding	0.47	8.73	9.21389e-05	2.1425e-05	0.49	0.000137486
USP22	ENSG00000124422	ubiquitin specific peptidase 22	protein_coding	0.47	8.05	3.40536e-05	3.62569e-05	0.5	7.28603e-05
LMO7	ENSG00000136153	LIM domain 7	protein_coding	0.53	6.54	0.00408067	0.0191569	0.31	0.0370163
USP9Y	ENSG00000114374	ubiquitin specific peptidase 9 Y-linked	protein_coding	0.55	5.94	0.01045	0.00869812	0.27	0.0788507
AFDN	ENSG00000130396	afadin, adherens junction formation factor	protein_coding	0.58	7.67	0.00131898	0.00678033	0.38	0.00555594
MAL2	ENSG00000147676	mal, T cell differentiation protein 2	protein_coding	0.6	7.01	0.0047613	0.00204666	0.52	4.16055e-05
TCAF1	ENSG00000198420	TRPM8 channel associated factor 1	protein_coding	0.6	5.68	4.08984e-05	8.23356e-05	0.49	0.000145098
CSGALNACT1	ENSG00000147408	chondroitin sulfate N-acetylgalactosaminyltransferase 1	protein_coding	0.65	7.01	0.00528703	0.0115934	0.31	0.0391025
SATB2	ENSG00000119042	SATB homeobox 2	protein_coding	0.65	3.53	2.57477e-05	2.29433e-07	0.59	9.21446e-07
IGF2R	ENSG00000197081	insulin like growth factor 2 receptor	protein_coding	0.68	7.88	0.000137546	2.34632e-05	0.47	0.000265288
OAS2	ENSG00000111335	2'-5'-oligoadenylate synthetase 2	protein_coding	0.86	5.47	0.0038288	0.0022933	0.4	0.00293093
ZNF850	ENSG00000267041	zinc finger protein 850	protein_coding	1.17	2.42	3.87904e-10	6.29031e-08	0.73	1.09704e-10
MKI67	ENSG00000148773	marker of proliferation Ki-67	protein_coding	1.46	4.09	0.00036662	1.03273e-05	0.64	4.97552e-08
PDLIM5	ENSG00000163110	PDZ and LIM domain 5	protein_coding	1.88	10.39	1.26003e-07	4.27225e-06	0.75	1.67914e-11

## Sheet: miR429
Gene name	Gene id	Description	Biotype	LogFC	LogCPM	QLF_FDR	MW_FDR	Spearman_correlation_coef	Spearman_correlation_FDR
SEMG1	ENSG00000124233	semenogelin 1	protein_coding	-11.58	13.14	4.59962e-07	0.0105588	-0.32	0.0302599
SULT2A1	ENSG00000105398	sulfotransferase family 2A member 1	protein_coding	-7.9	0.32	1.55107e-08	0.0276923	-0.34	0.0174809
KRT24	ENSG00000167916	keratin 24	protein_coding	-5.23	-0.64	1.207e-08	0.000471757	-0.54	1.18538e-05
HOXB5	ENSG00000120075	homeobox B5	protein_coding	-4.76	1.07	1.09159e-07	0.0200758	-0.36	0.00944364
ACSL6	ENSG00000164398	acyl-CoA synthetase long chain family member 6	protein_coding	-4.56	4.09	9.16422e-08	0.0451602	-0.18	0.297567
SLPI	ENSG00000124107	secretory leukocyte peptidase inhibitor	protein_coding	-3.84	7.05	7.58575e-07	0.0167927	-0.27	0.0788507
COLEC10	ENSG00000184374	collectin subfamily member 10	protein_coding	-3.23	-1.24	2.46849e-07	0.000157099	-0.47	0.000303288
TRIM55	ENSG00000147573	tripartite motif containing 55	protein_coding	-2.97	-1.7	0.000158667	0.0103103	-0.34	0.018988
PON3	ENSG00000105852	paraoxonase 3	protein_coding	-2.96	0.49	2.55966e-07	7.44704e-08	-0.62	1.80288e-07
MSLN	ENSG00000102854	mesothelin	protein_coding	-2.65	3.44	0.000228652	0.000929516	-0.39	0.00399208
ANO1	ENSG00000131620	anoctamin 1	protein_coding	-2.37	6.55	1.88383e-07	1.60999e-06	-0.62	1.53163e-07
LGR6	ENSG00000133067	leucine rich repeat containing G protein-coupled receptor 6	protein_coding	-2.15	3.56	6.70039e-07	1.60999e-06	-0.69	2.43402e-09
ANKRD1	ENSG00000148677	ankyrin repeat domain 1	protein_coding	-2.13	1.63	0.00722467	0.0133182	-0.27	0.0880055
ABCG2	ENSG00000118777	ATP binding cassette subfamily G member 2 (Junior blood group)	protein_coding	-2.1	5.07	2.0144e-06	6.38573e-06	-0.44	0.000936608
KCNK10	ENSG00000100433	potassium two pore domain channel subfamily K member 10	protein_coding	-2	-1.62	0.000371867	0.0036266	-0.28	0.0606107
EPHB1	ENSG00000154928	EPH receptor B1	protein_coding	-1.99	2.71	3.22765e-06	1.60999e-06	-0.62	1.53163e-07
LCN15	ENSG00000177984	lipocalin 15	protein_coding	-1.98	-0.96	0.00241155	0.012112	-0.23	0.158495
BCHE	ENSG00000114200	butyrylcholinesterase	protein_coding	-1.96	3.29	5.47826e-05	0.00127185	-0.43	0.00111769
MUC15	ENSG00000169550	mucin 15, cell surface associated	protein_coding	-1.96	2.16	0.000195222	0.000628978	-0.37	0.00767762
CHP2	ENSG00000166869	calcineurin like EF-hand protein 2	protein_coding	-1.87	1.87	0.00034275	7.70176e-06	-0.54	1.46248e-05
CCBE1	ENSG00000183287	collagen and calcium binding EGF domains 1	protein_coding	-1.87	2.53	2.25919e-07	2.83471e-06	-0.64	4.97552e-08
TRIM61	ENSG00000183439	tripartite motif containing 61	protein_coding	-1.83	-1.8	1.13684e-06	2.83471e-06	-0.58	1.97956e-06
CAV1	ENSG00000105974	caveolin 1	protein_coding	-1.81	7.24	3.24882e-09	9.88478e-08	-0.68	3.20386e-09
CHRDL1	ENSG00000101938	chordin like 1	protein_coding	-1.79	7.44	6.09634e-07	3.49769e-07	-0.64	4.18998e-08
FOXQ1	ENSG00000164379	forkhead box Q1	protein_coding	-1.77	3.21	7.86669e-06	0.000121957	-0.57	2.99831e-06
HOXD13	ENSG00000128714	homeobox D13	protein_coding	-1.76	3.88	5.7892e-07	1.44185e-06	-0.67	9.07373e-09
EDAR	ENSG00000135960	ectodysplasin A receptor	protein_coding	-1.73	1.05	0.000153848	0.000343955	-0.53	1.96819e-05
FAM215A	ENSG00000267496	family with sequence similarity 215 member A	lncRNA	-1.73	-4.02	0.000223768	0.000486826	-0.49	0.000141871
TAGLN	ENSG00000149591	transgelin	protein_coding	-1.72	11	3.30561e-08	1.27503e-06	-0.65	3.30066e-08
ALDH3A1	ENSG00000108602	aldehyde dehydrogenase 3 family member A1	protein_coding	-1.69	1.13	4.47986e-07	1.14387e-07	-0.68	4.22041e-09
OLFM4	ENSG00000102837	olfactomedin 4	protein_coding	-1.66	8.35	0.0456348	0.0486699	-0.24	0.140867
FAM83B	ENSG00000168143	family with sequence similarity 83 member B	protein_coding	-1.66	1.75	1.81016e-05	3.49769e-07	-0.62	2.27874e-07
KCTD4	ENSG00000180332	potassium channel tetramerization domain containing 4	protein_coding	-1.65	-3.88	0.00330523	0.0257577	-0.31	0.0329092
WNT10A	ENSG00000135925	Wnt family member 10A	protein_coding	-1.65	1.58	1.00978e-06	3.12501e-06	-0.59	9.88209e-07
COL17A1	ENSG00000065618	collagen type XVII alpha 1 chain	protein_coding	-1.64	6.01	3.502e-05	3.86319e-06	-0.67	7.75279e-09
ME1	ENSG00000065833	malic enzyme 1	protein_coding	-1.64	4.28	5.81689e-07	2.1425e-05	-0.64	6.88094e-08
DUSP4	ENSG00000120875	dual specificity phosphatase 4	protein_coding	-1.64	5.64	0.000638933	0.0329931	-0.23	0.165711
WNT7A	ENSG00000154764	Wnt family member 7A	protein_coding	-1.64	-1.13	0.000585019	0.00106381	-0.35	0.0127561
SERPINB5	ENSG00000206075	serpin family B member 5	protein_coding	-1.62	4.05	0.000667706	0.000368453	-0.52	3.71881e-05
TIMP4	ENSG00000157150	TIMP metallopeptidase inhibitor 4	protein_coding	-1.62	2.15	1.98621e-05	3.33837e-05	-0.56	4.74597e-06
CHST4	ENSG00000140835	carbohydrate sulfotransferase 4	protein_coding	-1.61	-2.53	4.39827e-05	8.23356e-05	-0.57	3.04748e-06
KLK6	ENSG00000167755	kallikrein related peptidase 6	protein_coding	-1.6	-2.12	0.000667706	0.00341981	-0.28	0.0732283
ACSF2	ENSG00000167107	acyl-CoA synthetase family member 2	protein_coding	-1.59	4.57	8.77835e-09	3.20376e-08	-0.75	1.67914e-11
P2RY2	ENSG00000175591	purinergic receptor P2Y2	protein_coding	-1.58	1.19	3.12819e-06	1.029e-06	-0.62	2.27874e-07
GPR87	ENSG00000138271	G protein-coupled receptor 87	protein_coding	-1.58	2.87	4.19188e-05	3.51703e-06	-0.63	7.45556e-08
RNF182	ENSG00000180537	ring finger protein 182	protein_coding	-1.58	-0.48	6.4779e-05	0.000929516	-0.49	0.000152188
FCRLB	ENSG00000162746	Fc receptor like B	protein_coding	-1.58	-0.05	1.13861e-05	2.27033e-06	-0.52	3.32546e-05
CFL2	ENSG00000165410	cofilin 2	protein_coding	-1.57	6.73	6.92358e-09	8.19343e-07	-0.66	1.07763e-08
PLP1	ENSG00000123560	proteolipid protein 1	protein_coding	-1.57	3.28	9.92225e-05	2.79808e-05	-0.55	1.08015e-05
DSG3	ENSG00000134757	desmoglein 3	protein_coding	-1.57	1.46	0.00600475	0.00135209	-0.39	0.00423103
GJB4	ENSG00000189433	gap junction protein beta 4	protein_coding	-1.56	0.73	0.000833887	0.000524111	-0.57	3.65758e-06
KRT23	ENSG00000108244	keratin 23	protein_coding	-1.56	4.77	0.000113683	7.00418e-06	-0.6	8.04276e-07
CXCR2	ENSG00000180871	C-X-C motif chemokine receptor 2	protein_coding	-1.55	1.1	0.000613641	3.45858e-05	-0.48	0.000191885
TGFB1I1	ENSG00000140682	transforming growth factor beta 1 induced transcript 1	protein_coding	-1.55	6.32	3.46289e-08	1.44185e-06	-0.65	3.57365e-08
SOSTDC1	ENSG00000171243	sclerostin domain containing 1	protein_coding	-1.55	1.63	3.3584e-05	2.29433e-07	-0.65	3.30066e-08
ARL14	ENSG00000179674	ADP ribosylation factor like GTPase 14	protein_coding	-1.55	-2.78	0.00411955	0.0208344	-0.21	0.206073
PNMA2	ENSG00000240694	PNMA family member 2	protein_coding	-1.53	1.13	5.24131e-05	0.000223079	-0.42	0.00157495
PRODH	ENSG00000100033	proline dehydrogenase 1	protein_coding	-1.52	0.35	9.67596e-06	2.27033e-06	-0.61	3.89939e-07
AKR1B10	ENSG00000198074	aldo-keto reductase family 1 member B10	protein_coding	-1.52	-2.16	0.00165803	0.00798134	-0.4	0.00382235
TMEM158	ENSG00000249992	transmembrane protein 158	protein_coding	-1.52	4.43	3.47307e-07	2.27033e-06	-0.52	3.32546e-05
PALLD	ENSG00000129116	palladin, cytoskeletal associated protein	protein_coding	-1.5	8.81	6.24605e-08	3.99678e-07	-0.63	8.70134e-08
MAMLD1	ENSG00000013619	mastermind like domain containing 1	protein_coding	-1.49	3.18	4.1245e-09	1.7717e-07	-0.68	2.65716e-09
IER3	ENSG00000137331	immediate early response 3	protein_coding	-1.49	5.42	4.91665e-05	6.42498e-07	-0.4	0.00305149
INSC	ENSG00000188487	INSC spindle orientation adaptor protein	protein_coding	-1.49	-0.87	7.0187e-05	4.65756e-05	-0.56	5.07086e-06
SCG5	ENSG00000166922	secretogranin V	protein_coding	-1.49	2.49	0.00425755	0.000192439	-0.39	0.0041416
ZNF185	ENSG00000147394	zinc finger protein 185 with LIM domain	protein_coding	-1.49	6.34	6.19603e-07	5.70751e-07	-0.6	5.62755e-07
HSD11B1	ENSG00000117594	hydroxysteroid 11-beta dehydrogenase 1	protein_coding	-1.47	2.99	7.21226e-05	8.9001e-05	-0.39	0.00463331
TH	ENSG00000180176	tyrosine hydroxylase	protein_coding	-1.47	-2.92	0.00109698	1.48971e-05	-0.5	8.77309e-05
IGF2	ENSG00000167244	insulin like growth factor 2	protein_coding	-1.46	5.1	1.12346e-05	6.4725e-05	-0.47	0.000352934
C19orf33	ENSG00000167644	chromosome 19 open reading frame 33	protein_coding	-1.45	2.29	0.000943417	0.000343955	-0.5	8.12124e-05
JAZF1	ENSG00000153814	JAZF zinc finger 1	protein_coding	-1.44	5.21	3.33351e-08	6.42498e-07	-0.65	2.79585e-08
NAGS	ENSG00000161653	N-acetylglutamate synthase	protein_coding	-1.44	1.82	4.16937e-07	7.70176e-06	-0.61	2.87782e-07
FCGBP	ENSG00000275395	Fc fragment of IgG binding protein	protein_coding	-1.44	5.75	0.00754113	0.0418084	-0.22	0.182476
LAMB3	ENSG00000196878	laminin subunit beta 3	protein_coding	-1.43	6.63	0.000167907	9.34876e-06	-0.6	5.62755e-07
CAV2	ENSG00000105971	caveolin 2	protein_coding	-1.43	5.32	2.12151e-11	4.77598e-08	-0.74	2.12017e-11
EPHA2	ENSG00000142627	EPH receptor A2	protein_coding	-1.43	5.04	0.000244127	0.000484355	-0.55	1.08015e-05
TMEM139	ENSG00000178826	transmembrane protein 139	protein_coding	-1.42	0.79	7.34992e-06	4.58686e-07	-0.59	1.20922e-06
CRIP1	ENSG00000213145	cysteine rich protein 1	protein_coding	-1.42	0.18	0.000156833	0.0139518	-0.3	0.0436217
MAMDC2	ENSG00000165072	MAM domain containing 2	protein_coding	-1.41	3.4	1.64326e-06	6.42498e-07	-0.57	2.79726e-06
ACE2	ENSG00000130234	angiotensin I converting enzyme 2	protein_coding	-1.4	0.44	0.00149491	0.00216808	-0.4	0.00384397
ST6GALNAC2	ENSG00000070731	ST6 N-acetylgalactosaminide alpha-2,6-sialyltransferase 2	protein_coding	-1.38	3.74	1.27942e-07	5.58231e-08	-0.68	2.65716e-09
S100A2	ENSG00000196754	S100 calcium binding protein A2	protein_coding	-1.37	3.38	0.00403684	0.00914711	-0.37	0.00767762
SLC38A5	ENSG00000017483	solute carrier family 38 member 5	protein_coding	-1.37	2.21	3.77249e-07	2.27033e-06	-0.55	1.01733e-05
FGF20	ENSG00000078579	fibroblast growth factor 20	protein_coding	-1.36	-2.82	0.000234716	8.19764e-05	-0.5	7.46137e-05
TINAGL1	ENSG00000142910	tubulointerstitial nephritis antigen like 1	protein_coding	-1.36	5.88	2.4869e-09	6.29031e-08	-0.72	1.63291e-10
CEACAM6	ENSG00000086548	CEA cell adhesion molecule 6	protein_coding	-1.35	3.12	0.00926767	0.0434428	-0.23	0.149819
CCDC80	ENSG00000091986	coiled-coil domain containing 80	protein_coding	-1.35	6.99	0.000197343	0.00257471	-0.36	0.0115672
RND3	ENSG00000115963	Rho family GTPase 3	protein_coding	-1.32	5.69	7.59629e-08	3.12501e-06	-0.63	9.46683e-08
FOXF1	ENSG00000103241	forkhead box F1	protein_coding	-1.32	5.06	7.92878e-06	8.9001e-05	-0.43	0.00121758
HSD17B2	ENSG00000086696	hydroxysteroid 17-beta dehydrogenase 2	protein_coding	-1.31	0.26	0.00973091	0.0200069	-0.28	0.069672
TCF7L1	ENSG00000152284	transcription factor 7 like 1	protein_coding	-1.3	4.54	2.79115e-10	4.13969e-08	-0.74	3.57878e-11
DNAJC15	ENSG00000120675	DnaJ heat shock protein family (Hsp40) member C15	protein_coding	-1.28	4.62	3.56575e-05	6.38573e-06	-0.47	0.000252907
KANK2	ENSG00000197256	KN motif and ankyrin repeat domains 2	protein_coding	-1.27	7.85	1.68467e-07	2.83471e-06	-0.6	4.85623e-07
YBX2	ENSG00000006047	Y-box binding protein 2	protein_coding	-1.27	0.39	5.68377e-05	1.12712e-05	-0.47	0.000321071
CCND2	ENSG00000118971	cyclin D2	protein_coding	-1.26	6.39	1.82356e-06	1.60999e-06	-0.61	3.37147e-07
BCL11A	ENSG00000119866	BAF chromatin remodeling complex subunit BCL11A	protein_coding	-1.26	3.35	0.00011298	8.23356e-05	-0.56	6.12063e-06
C6orf223	ENSG00000181577	chromosome 6 open reading frame 223	lncRNA	-1.26	-3.55	0.0120518	0.0178759	-0.25	0.122787
TGFBR3	ENSG00000069702	transforming growth factor beta receptor 3	protein_coding	-1.25	6.1	7.33191e-07	1.15271e-06	-0.54	1.75221e-05
DKK4	ENSG00000104371	dickkopf WNT signaling pathway inhibitor 4	protein_coding	-1.25	-1.9	0.0312359	0.000121957	-0.54	1.46248e-05
AHNAK2	ENSG00000185567	AHNAK nucleoprotein 2	protein_coding	-1.25	6	0.000277161	0.000121957	-0.48	0.000229242
ASB4	ENSG00000005981	ankyrin repeat and SOCS box containing 4	protein_coding	-1.24	-2.09	0.00406303	0.000929516	-0.42	0.00175367
PGAP4	ENSG00000165152	post-GPI attachment to proteins GalNAc transferase 4	protein_coding	-1.24	4.31	1.0613e-06	5.78647e-06	-0.66	9.83278e-09
CAVIN1	ENSG00000177469	caveolae associated protein 1	protein_coding	-1.24	9.06	9.89947e-08	2.02182e-06	-0.64	5.83096e-08
NT5E	ENSG00000135318	5'-nucleotidase ecto	protein_coding	-1.23	4.4	8.1262e-08	6.42498e-07	-0.64	4.18998e-08
DKK3	ENSG00000050165	dickkopf WNT signaling pathway inhibitor 3	protein_coding	-1.23	6.87	8.76099e-08	1.27503e-06	-0.64	4.18998e-08
TUBA1A	ENSG00000167552	tubulin alpha 1a	protein_coding	-1.22	7.24	1.87538e-07	5.96611e-05	-0.55	1.08015e-05
DZIP1	ENSG00000134874	DAZ interacting zinc finger protein 1	protein_coding	-1.21	3.95	1.43696e-08	6.42498e-07	-0.67	7.75279e-09
HOXD11	ENSG00000128713	homeobox D11	protein_coding	-1.21	1.68	0.000124678	0.000258085	-0.55	7.93946e-06
REEP1	ENSG00000068615	receptor accessory protein 1	protein_coding	-1.2	3.88	1.5284e-06	4.75591e-06	-0.56	5.07086e-06
AKR1C2	ENSG00000151632	aldo-keto reductase family 1 member C2	protein_coding	-1.19	1.42	7.83568e-05	5.04194e-05	-0.48	0.000177283
TRIM6	ENSG00000121236	tripartite motif containing 6	protein_coding	-1.19	1.88	6.54314e-08	4.13969e-08	-0.67	5.95488e-09
SAMD14	ENSG00000167100	sterile alpha motif domain containing 14	protein_coding	-1.19	2.04	2.37164e-06	2.56593e-05	-0.55	8.45401e-06
MYBPHL	ENSG00000221986	myosin binding protein H like	protein_coding	-1.18	-3.56	0.00492093	0.00586392	-0.44	0.0010532
CAVIN3	ENSG00000170955	caveolae associated protein 3	protein_coding	-1.18	3.83	5.64456e-05	0.000142294	-0.49	0.000160171
PCOLCE2	ENSG00000163710	procollagen C-endopeptidase enhancer 2	protein_coding	-1.16	4.07	0.00519499	0.0139518	-0.28	0.0645645
GJC2	ENSG00000198835	gap junction protein gamma 2	protein_coding	-1.15	1.06	9.11251e-07	1.60999e-06	-0.6	6.48744e-07
ANP32E	ENSG00000143401	acidic nuclear phosphoprotein 32 family member E	protein_coding	-1.15	5.06	4.18089e-10	7.44704e-08	-0.75	1.87201e-11
PNMA1	ENSG00000176903	PNMA family member 1	protein_coding	-1.15	6.4	1.08585e-06	3.06238e-05	-0.59	9.88209e-07
DDIT4	ENSG00000168209	DNA damage inducible transcript 4	protein_coding	-1.14	6.41	3.23868e-05	5.28358e-06	-0.51	5.22851e-05
ZNF711	ENSG00000147180	zinc finger protein 711	protein_coding	-1.14	2.22	9.29487e-07	2.53463e-06	-0.62	1.41953e-07
NAV2	ENSG00000166833	neuron navigator 2	protein_coding	-1.14	4.76	2.00816e-06	1.029e-06	-0.6	5.62755e-07
MRAP2	ENSG00000135324	melanocortin 2 receptor accessory protein 2	protein_coding	-1.14	3.11	5.70788e-07	2.02182e-06	-0.64	5.39976e-08
LARGE1	ENSG00000133424	LARGE xylosyl- and glucuronyltransferase 1	protein_coding	-1.13	5.55	9.71963e-07	9.34876e-06	-0.57	2.99831e-06
NRP2	ENSG00000118257	neuropilin 2	protein_coding	-1.12	5.35	3.37555e-05	0.000421634	-0.47	0.000252907
PLCD3	ENSG00000161714	phospholipase C delta 3	protein_coding	-1.12	4.77	1.30212e-08	2.0163e-07	-0.67	5.44629e-09
GPR161	ENSG00000143147	G protein-coupled receptor 161	protein_coding	-1.11	5.18	1.70765e-06	5.78647e-06	-0.54	1.46248e-05
AIF1L	ENSG00000126878	allograft inflammatory factor 1 like	protein_coding	-1.11	5.76	0.0117676	0.00960035	0.4	0.00370379
SLC35D3	ENSG00000182747	solute carrier family 35 member D3	protein_coding	-1.11	-2.35	0.0378312	0.0489431	-0.24	0.133067
PHACTR3	ENSG00000087495	phosphatase and actin regulator 3	protein_coding	-1.1	-1.66	0.00345141	0.0209174	-0.32	0.0254696
GPX8	ENSG00000164294	glutathione peroxidase 8 (putative)	protein_coding	-1.09	4.17	8.17148e-07	6.38573e-06	-0.6	8.04276e-07
VWA5A	ENSG00000110002	von Willebrand factor A domain containing 5A	protein_coding	-1.09	4.87	1.11479e-07	3.56548e-08	-0.7	5.96252e-10
LY75	ENSG00000054219	lymphocyte antigen 75	protein_coding	-1.09	1.96	2.10878e-05	3.33837e-05	-0.46	0.000407262
C3orf70	ENSG00000187068	chromosome 3 open reading frame 70	protein_coding	-1.08	4.52	8.3369e-06	4.65756e-05	-0.55	7.43394e-06
ZEB2	ENSG00000169554	zinc finger E-box binding homeobox 2	protein_coding	-1.07	5.42	9.36224e-05	0.000421634	-0.37	0.00741405
WWC3	ENSG00000047644	WWC family member 3	protein_coding	-1.07	6.26	3.01781e-05	8.46964e-06	-0.57	2.79726e-06
SEC23A	ENSG00000100934	Sec23 homolog A, COPII coat complex component	protein_coding	-1.06	6.07	8.85386e-08	4.27225e-06	-0.62	1.80288e-07
SLC4A11	ENSG00000088836	solute carrier family 4 member 11	protein_coding	-1.06	2.7	2.82214e-06	2.27033e-06	-0.56	5.74555e-06
ANKDD1A	ENSG00000166839	ankyrin repeat and death domain containing 1A	protein_coding	-1.06	2.96	8.87233e-08	3.49769e-07	-0.6	7.46979e-07
TMSB15B	ENSG00000269226	thymosin beta 15B [Source:NCBI gene (formerly Entrezgene)	protein_coding	-1.06	-3.28	0.000859965	6.4725e-05	-0.47	0.000321071
STK26	ENSG00000134602	serine/threonine kinase 26	protein_coding	-1.06	5.18	5.07795e-08	9.10646e-07	-0.63	1.0308e-07
MYORG	ENSG00000164976	myogenesis regulating glycosidase (putative)	protein_coding	-1.06	3.87	5.09599e-07	5.70751e-07	-0.62	2.11394e-07
PEAK1	ENSG00000173517	pseudopodium enriched atypical kinase 1	protein_coding	-1.05	5.42	3.42585e-05	3.95011e-05	-0.48	0.000177283
S100A3	ENSG00000188015	S100 calcium binding protein A3	protein_coding	-1.05	-0.58	0.000251524	0.00193142	-0.36	0.0115672
SOX2	ENSG00000181449	SRY-box transcription factor 2	protein_coding	-1.04	2.52	0.00541759	0.000421634	-0.49	0.000117658
ATP1B1	ENSG00000143153	ATPase Na+/K+ transporting subunit beta 1	protein_coding	-1.04	6.64	3.4029e-06	5.28358e-06	-0.59	1.39099e-06
ASXL3	ENSG00000141431	ASXL transcriptional regulator 3	protein_coding	-1.04	1.87	3.94336e-05	3.51703e-06	-0.52	2.97314e-05
C8orf48	ENSG00000164743	chromosome 8 open reading frame 48	protein_coding	-1.03	-2.54	0.00266928	0.00152142	-0.4	0.00349747
DENND2A	ENSG00000146966	DENN domain containing 2A	protein_coding	-1.03	3.61	7.26163e-05	0.000421634	-0.4	0.00329041
GEM	ENSG00000164949	GTP binding protein overexpressed in skeletal muscle	protein_coding	-1.02	4.79	0.000352679	0.00424223	-0.4	0.00305149
SCUBE3	ENSG00000146197	signal peptide, CUB domain and EGF like domain containing 3	protein_coding	-1.02	3.26	0.000284986	0.000451634	-0.42	0.00179426
BMP7	ENSG00000101144	bone morphogenetic protein 7	protein_coding	-1.01	4.25	0.00024771	3.95011e-05	-0.57	3.41444e-06
UGT1A6	ENSG00000167165	UDP glucuronosyltransferase family 1 member A6	protein_coding	-1.01	-1.5	0.0322788	0.00152142	-0.37	0.00898134
WNT16	ENSG00000002745	Wnt family member 16	protein_coding	-1	-0.31	0.00221021	0.000207215	-0.44	0.000936608
CLDN14	ENSG00000159261	claudin 14	protein_coding	-1	-2.43	0.00541759	0.00181931	-0.48	0.000186495
SLFN12	ENSG00000172123	schlafen family member 12	protein_coding	-1	1.44	0.000170533	7.2264e-07	-0.51	6.16314e-05
RAB11FIP2	ENSG00000107560	RAB11 family interacting protein 2	protein_coding	-0.98	5.36	4.30597e-06	5.78647e-06	-0.52	3.93514e-05
HOXD10	ENSG00000128710	homeobox D10	protein_coding	-0.97	2.79	0.00129477	0.00105439	-0.47	0.00030632
ANXA1	ENSG00000135046	annexin A1	protein_coding	-0.97	7.54	2.14144e-05	1.12712e-05	-0.54	1.38479e-05
ASPH	ENSG00000198363	aspartate beta-hydroxylase	protein_coding	-0.97	6.67	1.77877e-08	4.77598e-08	-0.71	5.46399e-10
IL18	ENSG00000150782	interleukin 18	protein_coding	-0.97	2.24	6.15956e-05	0.000421634	-0.4	0.00293093
BDKRB2	ENSG00000168398	bradykinin receptor B2	protein_coding	-0.97	2.79	0.00225338	0.00193142	-0.32	0.0294044
BCL2	ENSG00000171791	BCL2 apoptosis regulator	protein_coding	-0.96	5.27	5.55317e-05	7.62747e-05	-0.52	3.1525e-05
ACSL4	ENSG00000068366	acyl-CoA synthetase long chain family member 4	protein_coding	-0.96	5.23	1.32768e-07	3.86319e-06	-0.61	3.89939e-07
TIMP2	ENSG00000035862	TIMP metallopeptidase inhibitor 2	protein_coding	-0.96	8.41	1.00933e-05	4.2983e-05	-0.52	3.93514e-05
CHST11	ENSG00000171310	carbohydrate sulfotransferase 11	protein_coding	-0.96	4.1	2.15013e-05	5.96611e-05	-0.47	0.000321071
FHL2	ENSG00000115641	four and a half LIM domains 2	protein_coding	-0.96	6.46	2.12984e-06	1.12712e-05	-0.65	2.57881e-08
JDP2	ENSG00000140044	Jun dimerization protein 2	protein_coding	-0.96	4.17	6.73884e-07	5.78647e-06	-0.62	1.41953e-07
ANKRD33B	ENSG00000164236	ankyrin repeat domain 33B	protein_coding	-0.95	2.83	0.00341207	0.00181931	-0.41	0.00259788
ARHGEF19	ENSG00000142632	Rho guanine nucleotide exchange factor 19	protein_coding	-0.95	4.03	1.87576e-05	6.42498e-07	-0.57	2.99831e-06
ARL9	ENSG00000196503	ADP ribosylation factor like GTPase 9	protein_coding	-0.95	-0.37	5.63085e-05	0.000394797	-0.55	1.08015e-05
PLD1	ENSG00000075651	phospholipase D1	protein_coding	-0.94	3.34	1.9951e-07	9.88478e-08	-0.63	1.31328e-07
ADORA2B	ENSG00000170425	adenosine A2b receptor	protein_coding	-0.93	1.4	0.000951851	0.00135209	-0.43	0.00138889
TLE6	ENSG00000104953	TLE family member 6, subcortical maternal complex member	protein_coding	-0.93	0.56	0.00135062	0.0115934	-0.35	0.0150343
CASP1	ENSG00000137752	caspase 1	protein_coding	-0.93	3.19	1.29536e-05	1.79854e-05	-0.56	4.43413e-06
HBA2	ENSG00000188536	hemoglobin subunit alpha 2	protein_coding	-0.92	1.92	0.0377227	0.00828476	-0.22	0.178967
ZEB1	ENSG00000148516	zinc finger E-box binding homeobox 1	protein_coding	-0.91	5.41	5.22892e-05	0.000165671	-0.47	0.000252907
TNIK	ENSG00000154310	TRAF2 and NCK interacting kinase	protein_coding	-0.9	3.6	0.00392255	0.000718092	-0.36	0.01119
NKD1	ENSG00000140807	NKD inhibitor of WNT signaling pathway 1	protein_coding	-0.9	3.86	0.00299133	0.000991802	-0.43	0.00144977
MSX2	ENSG00000120149	msh homeobox 2	protein_coding	-0.9	1.88	0.00221003	0.0017163	-0.43	0.00138889
HPDL	ENSG00000186603	4-hydroxyphenylpyruvate dioxygenase like	protein_coding	-0.89	0.52	0.0106575	0.0153172	-0.37	0.00794114
RASL11A	ENSG00000122035	RAS like family 11 member A	protein_coding	-0.89	4.33	0.00206734	0.00181931	-0.33	0.0232659
PITPNM3	ENSG00000091622	PITPNM family member 3	protein_coding	-0.89	4.24	2.7891e-06	4.58686e-07	-0.64	6.30458e-08
PCDH9	ENSG00000184226	protocadherin 9	protein_coding	-0.88	2.85	0.000235458	7.02704e-05	-0.5	9.55207e-05
SERPINE2	ENSG00000135919	serpin family E member 2	protein_coding	-0.88	3.93	0.00213085	0.00869812	-0.29	0.0525211
PLAU	ENSG00000122861	plasminogen activator, urokinase	protein_coding	-0.87	3.99	2.4957e-05	2.29433e-07	-0.58	2.13046e-06
ITPR1	ENSG00000150995	inositol 1,4,5-trisphosphate receptor type 1	protein_coding	-0.87	7.16	0.00508263	0.00341981	-0.37	0.00715575
GSN	ENSG00000148180	gelsolin	protein_coding	-0.86	9.1	2.81636e-05	7.62747e-05	-0.48	0.000240953
TRIM16	ENSG00000221926	tripartite motif containing 16	protein_coding	-0.86	3.15	5.1118e-06	3.86319e-06	-0.54	1.46248e-05
LAPTM4B	ENSG00000104341	lysosomal protein transmembrane 4 beta	protein_coding	-0.86	5.69	1.67523e-05	4.27225e-06	-0.65	2.37517e-08
SHF	ENSG00000138606	Src homology 2 domain containing F	protein_coding	-0.86	2.94	2.83238e-08	3.08144e-07	-0.7	1.05144e-09
NDN	ENSG00000182636	necdin, MAGE family member	protein_coding	-0.85	5.43	1.98314e-07	1.029e-06	-0.62	2.45614e-07
TFCP2L1	ENSG00000115112	transcription factor CP2 like 1	protein_coding	-0.85	5.27	0.0290737	0.0434428	-0.29	0.0583924
CDKN1C	ENSG00000129757	cyclin dependent kinase inhibitor 1C	protein_coding	-0.84	4.45	9.79861e-08	4.27225e-06	-0.71	5.46399e-10
ALDH3B1	ENSG00000006534	aldehyde dehydrogenase 3 family member B1	protein_coding	-0.84	3.03	1.16169e-05	4.75591e-06	-0.55	7.93946e-06
MBNL2	ENSG00000139793	muscleblind like splicing regulator 2	protein_coding	-0.83	6.14	3.05222e-07	5.70751e-07	-0.65	2.79585e-08
CLEC2B	ENSG00000110852	C-type lectin domain family 2 member B	protein_coding	-0.82	2.35	5.50967e-05	0.000153928	-0.47	0.000292139
EPSTI1	ENSG00000133106	epithelial stromal interaction 1	protein_coding	-0.82	2.44	0.00240267	2.1425e-05	-0.41	0.00249509
PJA1	ENSG00000181191	praja ring finger ubiquitin ligase 1	protein_coding	-0.81	5.24	3.43161e-06	4.13969e-08	-0.66	1.07763e-08
CIB2	ENSG00000136425	calcium and integrin binding family member 2	protein_coding	-0.8	3.74	0.000284799	0.000153928	-0.48	0.000217954
DIXDC1	ENSG00000150764	DIX domain containing 1	protein_coding	-0.79	6.08	0.000166538	5.28358e-06	-0.5	8.12124e-05
EOGT	ENSG00000163378	EGF domain specific O-linked N-acetylglucosamine transferase	protein_coding	-0.79	5.1	2.86004e-08	5.70751e-07	-0.66	1.53586e-08
CYP2S1	ENSG00000167600	cytochrome P450 family 2 subfamily S member 1	protein_coding	-0.79	1.45	0.000324922	0.000991802	-0.49	0.000130248
DPYSL2	ENSG00000092964	dihydropyrimidinase like 2	protein_coding	-0.78	5.67	0.000108922	0.000368453	-0.42	0.00151033
MMP28	ENSG00000271447	matrix metallopeptidase 28	protein_coding	-0.78	2.99	0.000570871	0.00152142	-0.53	2.2138e-05
ADA2	ENSG00000093072	adenosine deaminase 2	protein_coding	-0.77	5.59	0.000422777	0.000258085	-0.44	0.00081789
CDKN2B	ENSG00000147883	cyclin dependent kinase inhibitor 2B	protein_coding	-0.76	3.47	0.000317927	0.00181931	-0.47	0.000292139
TSC22D3	ENSG00000157514	TSC22 domain family member 3	protein_coding	-0.76	8.47	0.000439582	0.000929516	-0.33	0.0218743
TENT5A	ENSG00000112773	terminal nucleotidyltransferase 5A	protein_coding	-0.76	5.27	0.0104323	0.00119295	-0.41	0.00259788
GATA6	ENSG00000141448	GATA binding protein 6	protein_coding	-0.75	3.12	0.00425324	0.0317288	-0.27	0.0840704
KANK1	ENSG00000107104	KN motif and ankyrin repeat domains 1	protein_coding	-0.75	6.7	9.56029e-07	1.35633e-05	-0.59	1.29704e-06
COL4A4	ENSG00000081052	collagen type IV alpha 4 chain	protein_coding	-0.75	3.71	0.00387059	0.0115934	-0.34	0.0193046
INHBE	ENSG00000139269	inhibin subunit beta E	protein_coding	-0.75	-0.28	0.00804574	0.00678033	-0.32	0.0294044
MROH6	ENSG00000204839	maestro heat like repeat family member 6	protein_coding	-0.75	1.11	0.000436575	1.96007e-05	-0.48	0.000229242
CARD6	ENSG00000132357	caspase recruitment domain family member 6	protein_coding	-0.75	2.14	0.000986886	0.00216808	-0.35	0.0131946
RGL1	ENSG00000143344	ral guanine nucleotide dissociation stimulator like 1	protein_coding	-0.74	5.07	0.000565164	0.000131957	-0.39	0.00463331
LPP	ENSG00000145012	LIM domain containing preferred translocation partner in lipoma	protein_coding	-0.73	8.94	0.000166131	0.000817229	-0.42	0.00171864
SH3PXD2A	ENSG00000107957	SH3 and PX domains 2A	protein_coding	-0.73	6.24	2.49031e-05	4.65756e-05	-0.55	1.01733e-05
DSE	ENSG00000111817	dermatan sulfate epimerase	protein_coding	-0.73	4.46	3.54752e-05	2.53463e-06	-0.51	5.83778e-05
FAM13B	ENSG00000031003	family with sequence similarity 13 member B	protein_coding	-0.73	6	5.45949e-06	1.44185e-06	-0.51	4.66114e-05
PLAC8	ENSG00000145287	placenta associated 8	protein_coding	-0.73	0.95	0.014497	0.00678033	-0.35	0.01364
SLC16A2	ENSG00000147100	solute carrier family 16 member 2	protein_coding	-0.73	4.59	6.61806e-05	5.04194e-05	-0.55	1.08015e-05
RNF122	ENSG00000133874	ring finger protein 122	protein_coding	-0.73	3.09	0.000140549	0.000142294	-0.42	0.00164565
TMSB15B	ENSG00000158427	thymosin beta 15B	protein_coding	-0.73	-2.18	0.0152059	0.00472447	-0.42	0.00157495
PRRG4	ENSG00000135378	proline rich and Gla domain 4	protein_coding	-0.72	5.22	4.09932e-05	3.33837e-05	-0.52	3.32546e-05
RBMS1	ENSG00000153250	RNA binding motif single stranded interacting protein 1	protein_coding	-0.72	5.58	9.96481e-08	1.029e-06	-0.65	2.19075e-08
AHR	ENSG00000106546	aryl hydrocarbon receptor	protein_coding	-0.72	5.85	0.000124084	0.000587634	-0.42	0.00195299
ALDOC	ENSG00000109107	aldolase, fructose-bisphosphate C	protein_coding	-0.72	4.52	2.44272e-06	7.70176e-06	-0.61	3.89939e-07
ARSL	ENSG00000157399	arylsulfatase L	protein_coding	-0.72	-0.31	0.0108844	0.00645785	-0.37	0.00715575
ITGA2	ENSG00000164171	integrin subunit alpha 2	protein_coding	-0.71	5.45	0.00544762	9.61399e-05	-0.43	0.0011662
PRSS23	ENSG00000150687	serine protease 23	protein_coding	-0.71	7.37	3.95241e-05	0.000343955	-0.49	0.000152188
CCDC9B	ENSG00000188549	coiled-coil domain containing 9B	protein_coding	-0.71	4.74	0.00193491	0.00960035	-0.37	0.00822707
APCDD1	ENSG00000154856	APC down-regulated 1	protein_coding	-0.7	6.65	0.00539198	0.000550382	-0.45	0.000566618
TMEM237	ENSG00000155755	transmembrane protein 237	protein_coding	-0.7	4.72	6.23521e-08	7.70176e-06	-0.67	5.95488e-09
ECM1	ENSG00000143369	extracellular matrix protein 1	protein_coding	-0.7	3.73	0.00249783	0.00914711	-0.32	0.0277311
LHFPL2	ENSG00000145685	LHFPL tetraspan subfamily member 2	protein_coding	-0.69	4.86	0.000213731	0.0017163	-0.42	0.00195299
KIF7	ENSG00000166813	kinesin family member 7	protein_coding	-0.69	3.46	6.99419e-05	0.000258085	-0.53	1.96819e-05
ADGRG5	ENSG00000159618	adhesion G protein-coupled receptor G5	protein_coding	-0.69	0.63	0.0197579	0.00552537	-0.37	0.00912223
FCGRT	ENSG00000104870	Fc fragment of IgG receptor and transporter	protein_coding	-0.68	6.52	7.64596e-07	2.53463e-06	-0.64	3.86948e-08
FADS1	ENSG00000149485	fatty acid desaturase 1	protein_coding	-0.68	5.67	0.00367787	1.35633e-05	-0.5	8.12124e-05
RAP1A	ENSG00000116473	RAP1A, member of RAS oncogene family	protein_coding	-0.68	6.6	3.088e-06	8.46964e-06	-0.57	2.61355e-06
SH3BGRL	ENSG00000131171	SH3 domain binding glutamate rich protein like	protein_coding	-0.68	7.43	9.96128e-05	5.47903e-05	-0.5	8.58552e-05
MB21D2	ENSG00000180611	Mab-21 domain containing 2	protein_coding	-0.68	1.71	0.000120054	2.56593e-05	-0.5	9.55207e-05
NPTN	ENSG00000156642	neuroplastin	protein_coding	-0.67	7.42	2.64856e-07	3.51703e-06	-0.68	4.22041e-09
NRM	ENSG00000137404	nurim	protein_coding	-0.66	3.17	3.46923e-06	5.70751e-07	-0.62	2.27874e-07
TPPP3	ENSG00000159713	tubulin polymerization promoting protein family member 3	protein_coding	-0.65	2.89	0.0232114	0.0191569	-0.35	0.0131946
WNT5B	ENSG00000111186	Wnt family member 5B	protein_coding	-0.65	5.78	0.000831006	0.00152142	-0.44	0.000855764
MYADM	ENSG00000179820	myeloid associated differentiation marker	protein_coding	-0.65	7.8	0.00288464	0.00152142	-0.37	0.00794114
STX1B	ENSG00000099365	syntaxin 1B	protein_coding	-0.65	0.01	0.00066859	0.000192439	-0.44	0.000746307
AXL	ENSG00000167601	AXL receptor tyrosine kinase	protein_coding	-0.64	5.6	0.000506231	0.000258085	-0.45	0.000680102
KLF10	ENSG00000155090	Kruppel like factor 10	protein_coding	-0.64	6.16	0.0486685	0.0228166	-0.3	0.0448381
SPRY2	ENSG00000136158	sprouty RTK signaling antagonist 2	protein_coding	-0.64	4.69	3.2684e-06	1.15271e-06	-0.57	2.79726e-06
STING1	ENSG00000184584	stimulator of interferon response cGAMP interactor 1	protein_coding	-0.64	5.38	0.00138741	0.000178993	-0.47	0.000265288
CD274	ENSG00000120217	CD274 molecule	protein_coding	-0.63	1.36	0.00228666	1.03273e-05	-0.42	0.00187126
EPS8	ENSG00000151491	epidermal growth factor receptor pathway substrate 8	protein_coding	-0.63	5.31	8.7615e-05	2.79808e-05	-0.45	0.000650583
NR3C1	ENSG00000113580	nuclear receptor subfamily 3 group C member 1	protein_coding	-0.63	6.2	9.60792e-06	2.53463e-06	-0.57	3.41444e-06
AMOTL2	ENSG00000114019	angiomotin like 2	protein_coding	-0.63	6.37	0.00381721	0.00750043	-0.36	0.0108333
OXR1	ENSG00000164830	oxidation resistance 1	protein_coding	-0.63	5.57	0.000138117	1.029e-06	-0.52	3.93514e-05
MAP3K14	ENSG00000006062	mitogen-activated protein kinase kinase kinase 14	protein_coding	-0.63	4.36	0.000415339	1.96007e-05	-0.49	0.000123889
IGFBP3	ENSG00000146674	insulin like growth factor binding protein 3	protein_coding	-0.62	6.89	0.0161259	0.00499081	-0.43	0.00121758
ADCY9	ENSG00000162104	adenylate cyclase 9	protein_coding	-0.62	4.65	0.00170332	0.00127185	-0.37	0.00881069
TNFRSF25	ENSG00000215788	TNF receptor superfamily member 25	protein_coding	-0.62	1.4	0.0104819	0.000673328	-0.35	0.0123306
SNCAIP	ENSG00000064692	synuclein alpha interacting protein	protein_coding	-0.62	3.01	0.020028	0.0153172	-0.37	0.00741405
TRPS1	ENSG00000104447	transcriptional repressor GATA binding 1	protein_coding	-0.61	5.28	0.000988788	0.000104097	-0.42	0.00187126
CELSR2	ENSG00000143126	cadherin EGF LAG seven-pass G-type receptor 2	protein_coding	-0.61	5.48	0.0030999	0.00323605	-0.38	0.00576225
CEBPB	ENSG00000172216	CCAAT enhancer binding protein beta	protein_coding	-0.6	5.21	0.0030066	2.79808e-05	-0.37	0.00822707
MFGE8	ENSG00000140545	milk fat globule EGF and factor V/VIII domain containing	protein_coding	-0.6	6.76	0.00369766	0.00204666	-0.38	0.00535947
CBX6	ENSG00000183741	chromobox 6	protein_coding	-0.6	6.9	0.00047566	0.000484355	-0.44	0.000936608
STARD5	ENSG00000172345	StAR related lipid transfer domain containing 5	protein_coding	-0.6	2.15	0.000277161	0.000207215	-0.46	0.000449455
ALOX5AP	ENSG00000132965	arachidonate 5-lipoxygenase activating protein	protein_coding	-0.59	2.58	0.019701	0.00472447	-0.31	0.0359727
PPP1R18	ENSG00000146112	protein phosphatase 1 regulatory subunit 18	protein_coding	-0.58	5.21	0.000623643	0.000673328	-0.41	0.00259788
NR2F1	ENSG00000175745	nuclear receptor subfamily 2 group F member 1	protein_coding	-0.58	5.78	0.00967629	0.00424223	-0.32	0.0277311
MTSS2	ENSG00000132613	MTSS I-BAR domain containing 2	protein_coding	-0.58	4.59	3.46969e-05	1.48971e-05	-0.59	1.29704e-06
RBFOX2	ENSG00000100320	RNA binding fox-1 homolog 2	protein_coding	-0.57	6.88	1.03069e-05	2.34632e-05	-0.52	4.39969e-05
DNAJC27	ENSG00000115137	DnaJ heat shock protein family (Hsp40) member C27	protein_coding	-0.57	3.03	2.75534e-06	3.86319e-06	-0.62	2.45614e-07
IQCK	ENSG00000174628	IQ motif containing K	protein_coding	-0.57	3.17	0.000138609	0.000258085	-0.54	1.55462e-05
FEZ2	ENSG00000171055	fasciculation and elongation protein zeta 2	protein_coding	-0.57	5.21	7.89691e-06	2.83471e-06	-0.55	8.45401e-06
VAMP1	ENSG00000139190	vesicle associated membrane protein 1	protein_coding	-0.57	2.72	0.000746209	4.75591e-06	-0.47	0.000252907
LOXL3	ENSG00000115318	lysyl oxidase like 3	protein_coding	-0.57	1.91	0.00638002	0.00750043	-0.29	0.0568921
GPAT3	ENSG00000138678	glycerol-3-phosphate acyltransferase 3	protein_coding	-0.57	1.42	0.0195188	0.00216808	-0.43	0.0011662
POGLUT3	ENSG00000178202	protein O-glucosyltransferase 3	protein_coding	-0.57	6.05	0.000126393	1.96007e-05	-0.5	8.58552e-05
CCDC68	ENSG00000166510	coiled-coil domain containing 68	protein_coding	-0.56	2.46	0.0131411	0.00525639	-0.36	0.0101249
C6orf58	ENSG00000184530	chromosome 6 open reading frame 58	protein_coding	-0.56	-2.47	0.0270781	0.00525639	-0.36	0.0115672
PHLDB1	ENSG00000019144	pleckstrin homology like domain family B member 1	protein_coding	-0.56	5.75	0.000701758	0.000718092	-0.44	0.000979719
QKI	ENSG00000112531	QKI, KH domain containing RNA binding	protein_coding	-0.55	6.04	0.000134075	9.61399e-05	-0.44	0.000936608
RSU1	ENSG00000148484	Ras suppressor protein 1	protein_coding	-0.55	6.07	9.07051e-06	1.48971e-05	-0.52	4.16055e-05
SNAPC1	ENSG00000023608	small nuclear RNA activating complex polypeptide 1	protein_coding	-0.55	3.42	2.63278e-06	2.02182e-06	-0.64	5.83096e-08
ZMAT3	ENSG00000172667	zinc finger matrin-type 3	protein_coding	-0.54	5.16	0.000864054	0.000223079	-0.37	0.00767762
MBNL1	ENSG00000152601	muscleblind like splicing regulator 1	protein_coding	-0.54	7.38	2.70359e-05	2.1425e-05	-0.53	1.96819e-05
PTPN14	ENSG00000152104	protein tyrosine phosphatase non-receptor type 14	protein_coding	-0.54	6.2	0.00293797	0.000277228	-0.4	0.00370379
ARHGEF6	ENSG00000129675	Rac/Cdc42 guanine nucleotide exchange factor 6	protein_coding	-0.54	4.11	0.0144163	0.0146191	-0.23	0.146763
RAB32	ENSG00000118508	RAB32, member RAS oncogene family	protein_coding	-0.53	3.51	0.0030066	0.0071382	-0.39	0.0041416
LRRCC1	ENSG00000133739	leucine rich repeat and coiled-coil centrosomal protein 1	protein_coding	-0.53	3.96	0.000345584	0.000104097	-0.45	0.000516065
KLHL42	ENSG00000087448	kelch like family member 42	protein_coding	-0.52	5.66	0.000263656	0.000394797	-0.45	0.000621082
DCBLD2	ENSG00000057019	discoidin, CUB and LCCL domain containing 2	protein_coding	-0.52	5.45	8.10481e-06	1.03273e-05	-0.58	1.49334e-06
SEPTIN7	ENSG00000122545	septin 7	protein_coding	-0.52	7.09	6.47082e-06	1.96007e-05	-0.53	2.49308e-05
GBGT1	ENSG00000148288	globoside alpha-1,3-N-acetylgalactosaminyltransferase 1 (FORS blood group)	protein_coding	-0.52	2.4	0.000397913	7.00418e-06	-0.54	1.15269e-05
DPH3	ENSG00000154813	diphthamide biosynthesis 3	protein_coding	-0.51	4.71	2.56623e-05	1.48971e-05	-0.57	2.79726e-06
SLC16A3	ENSG00000141526	solute carrier family 16 member 3	protein_coding	-0.5	3.9	0.0493998	0.000587634	-0.46	0.000470463
CEP162	ENSG00000135315	centrosomal protein 162	protein_coding	-0.5	3.13	0.000439374	3.86319e-06	-0.49	0.0001115
RTL8C	ENSG00000134590	retrotransposon Gag like 8C	protein_coding	-0.49	6.61	0.000701758	3.62569e-05	-0.45	0.000593332
JAG2	ENSG00000184916	jagged canonical Notch ligand 2	protein_coding	-0.49	5.09	0.00501864	0.0071382	-0.37	0.00794114
ENAH	ENSG00000154380	ENAH actin regulator	protein_coding	-0.49	7.51	2.53762e-05	0.000121957	-0.51	6.16314e-05
KIAA0040	ENSG00000235750	KIAA0040	protein_coding	-0.49	5.38	0.00637626	0.00525639	-0.35	0.0131946
LRRC49	ENSG00000137821	leucine rich repeat containing 49	protein_coding	-0.49	3.68	0.00062045	7.62747e-05	-0.46	0.000370213
FOSL2	ENSG00000075426	FOS like 2, AP-1 transcription factor subunit	protein_coding	-0.49	7.36	0.043867	0.0434428	-0.24	0.134186
BBX	ENSG00000114439	BBX high mobility group box domain containing	protein_coding	-0.48	6.96	0.00106959	8.23356e-05	-0.4	0.00329041
PLCG2	ENSG00000197943	phospholipase C gamma 2	protein_coding	-0.48	3.21	0.0204869	0.000516437	-0.31	0.0320716
LY6E	ENSG00000160932	lymphocyte antigen 6 family member E	protein_coding	-0.48	6.63	0.00772922	0.00499081	-0.39	0.00498396
MPRIP	ENSG00000133030	myosin phosphatase Rho interacting protein	protein_coding	-0.47	7.2	0.000319291	0.000343955	-0.47	0.000336332
PHACTR2	ENSG00000112419	phosphatase and actin regulator 2	protein_coding	-0.47	5.78	0.00370304	0.00424223	-0.34	0.0193046
POGLUT2	ENSG00000134901	protein O-glucosyltransferase 2	protein_coding	-0.47	1.93	0.0107078	0.0110517	-0.32	0.0302599
DNAJB6	ENSG00000105993	DnaJ heat shock protein family (Hsp40) member B6	protein_coding	-0.46	6.15	3.44853e-05	3.33837e-05	-0.58	1.84325e-06
C21orf91	ENSG00000154642	chromosome 21 open reading frame 91	protein_coding	-0.46	4.06	0.000140102	4.65756e-05	-0.46	0.000407262
FYN	ENSG00000010810	FYN proto-oncogene, Src family tyrosine kinase	protein_coding	-0.46	3.97	0.0105707	0.00305782	-0.31	0.0349812
KLHL21	ENSG00000162413	kelch like family member 21	protein_coding	-0.46	6.35	0.000434654	0.000451634	-0.47	0.000265288
PELI2	ENSG00000139946	pellino E3 ubiquitin protein ligase family member 2	protein_coding	-0.46	4.15	0.000346874	0.000484355	-0.44	0.00081789
CHURC1	ENSG00000258289	churchill domain containing 1	protein_coding	-0.46	5.71	0.00055332	1.80784e-06	-0.45	0.000713223
PRMT2	ENSG00000160310	protein arginine methyltransferase 2	protein_coding	-0.46	6.53	3.04901e-05	8.46964e-06	-0.57	3.41444e-06
CKB	ENSG00000166165	creatine kinase B	protein_coding	-0.46	9.5	0.0112196	0.00869812	-0.37	0.00794114
EXT1	ENSG00000182197	exostosin glycosyltransferase 1	protein_coding	-0.45	5.36	0.000117933	8.23356e-05	-0.51	6.88119e-05
SOWAHC	ENSG00000198142	sosondowah ankyrin repeat domain family member C	protein_coding	-0.45	4.79	0.000521394	0.000165671	-0.46	0.000370213
DENND5A	ENSG00000184014	DENN domain containing 5A	protein_coding	-0.45	6.11	0.000352612	0.000718092	-0.45	0.000713223
ATG5	ENSG00000057663	autophagy related 5	protein_coding	-0.45	5.47	0.000667706	0.00119295	-0.45	0.000680102
ST3GAL2	ENSG00000157350	ST3 beta-galactoside alpha-2,3-sialyltransferase 2	protein_coding	-0.45	4.45	0.00270042	0.00135209	-0.41	0.00220977
ITPRID2	ENSG00000138434	ITPR interacting domain containing 2	protein_coding	-0.45	6.86	0.00431191	0.00472447	-0.31	0.0370163
LZTFL1	ENSG00000163818	leucine zipper transcription factor like 1	protein_coding	-0.44	4.47	2.17984e-05	3.12501e-06	-0.56	6.12063e-06
SPSB1	ENSG00000171621	splA/ryanodine receptor domain and SOCS box containing 1	protein_coding	-0.44	4.69	0.0289007	0.00750043	-0.31	0.0391025
RBMS2	ENSG00000076067	RNA binding motif single stranded interacting protein 2	protein_coding	-0.43	5.22	0.00026556	7.02704e-05	-0.48	0.000206283
RPS6KA5	ENSG00000100784	ribosomal protein S6 kinase A5	protein_coding	-0.43	4.07	0.00216838	8.23356e-05	-0.51	6.88119e-05
STK38L	ENSG00000211455	serine/threonine kinase 38 like	protein_coding	-0.43	5.65	0.00467177	0.00472447	-0.38	0.00576225
CCDC50	ENSG00000152492	coiled-coil domain containing 50	protein_coding	-0.43	6.44	0.00028525	5.04194e-05	-0.45	0.000593332
UPP1	ENSG00000183696	uridine phosphorylase 1	protein_coding	-0.42	2.69	0.0247182	0.0153172	-0.36	0.0104711
WFS1	ENSG00000109501	wolframin ER transmembrane glycoprotein	protein_coding	-0.41	6.97	0.00931003	0.00869812	-0.33	0.0232659
ZSCAN18	ENSG00000121413	zinc finger and SCAN domain containing 18	protein_coding	-0.41	5.61	1.89778e-06	3.34939e-08	-0.6	6.068e-07
PTEN	ENSG00000171862	phosphatase and tensin homolog	protein_coding	-0.4	6.85	0.0088927	0.000516437	-0.38	0.00555594
MPDZ	ENSG00000107186	multiple PDZ domain crumbs cell polarity complex component	protein_coding	-0.4	5.99	0.0246913	0.0191569	-0.28	0.0679462
LACC1	ENSG00000179630	laccase domain containing 1	protein_coding	-0.4	3.3	0.00533604	0.0110517	-0.4	0.00293093
LPAR6	ENSG00000139679	lysophosphatidic acid receptor 6	protein_coding	-0.4	5.51	0.0261528	0.0292706	-0.27	0.0788507
OSTM1	ENSG00000081087	osteoclastogenesis associated transmembrane protein 1	protein_coding	-0.39	5.23	0.00197795	0.000394797	-0.47	0.000336332
TMEM106B	ENSG00000106460	transmembrane protein 106B	protein_coding	-0.39	6.82	0.00230857	0.000394797	-0.42	0.00151033
CDKN2AIP	ENSG00000168564	CDKN2A interacting protein	protein_coding	-0.39	4.79	5.31104e-05	2.83471e-06	-0.59	1.13162e-06
MAPK7	ENSG00000166484	mitogen-activated protein kinase 7	protein_coding	-0.38	4.22	0.000370737	0.000192439	-0.45	0.000566618
RAP1B	ENSG00000127314	RAP1B, member of RAS oncogene family	protein_coding	-0.38	5.27	0.000153719	0.000319697	-0.47	0.000265288
PPM1F	ENSG00000100034	protein phosphatase, Mg2+/Mn2+ dependent 1F	protein_coding	-0.38	5.32	0.0165046	0.0153172	-0.31	0.0330172
YAF2	ENSG00000015153	YY1 associated factor 2	protein_coding	-0.38	3.96	0.000506887	0.000112656	-0.49	0.000152188
SLC35G1	ENSG00000176273	solute carrier family 35 member G1	protein_coding	-0.38	1.93	0.0453525	0.0153172	-0.28	0.0614466
KLF11	ENSG00000172059	Kruppel like factor 11	protein_coding	-0.37	4.58	0.038569	0.00525639	-0.24	0.125948
ABCD1	ENSG00000101986	ATP binding cassette subfamily D member 1	protein_coding	-0.37	4.43	0.0205624	0.0146191	-0.3	0.0472526
SP100	ENSG00000067066	SP100 nuclear antigen	protein_coding	-0.37	5.74	0.00180975	8.46964e-06	-0.53	2.2138e-05
BTBD3	ENSG00000132640	BTB domain containing 3	protein_coding	-0.37	5.37	0.0107892	0.00360705	-0.34	0.0193046
MAPRE1	ENSG00000101367	microtubule associated protein RP/EB family member 1	protein_coding	-0.36	7.07	0.000539499	0.000142294	-0.48	0.000168411
WDR44	ENSG00000131725	WD repeat domain 44	protein_coding	-0.36	4.4	0.00625692	0.00204666	-0.34	0.0160305
ERC1	ENSG00000082805	ELKS/RAB6-interacting/CAST family member 1	protein_coding	-0.35	6.32	0.0213236	0.00869812	-0.3	0.0448381
KLHL15	ENSG00000174010	kelch like family member 15	protein_coding	-0.35	4.34	0.048663	0.0167927	-0.26	0.0943614
ACOT2	ENSG00000119673	acyl-CoA thioesterase 2	protein_coding	-0.35	3.9	0.0226554	0.0071382	-0.36	0.0101249
KDSR	ENSG00000119537	3-ketodihydrosphingosine reductase	protein_coding	-0.34	6.15	8.32648e-05	3.99678e-07	-0.59	1.39099e-06
HSD17B8	ENSG00000204228	hydroxysteroid 17-beta dehydrogenase 8	protein_coding	-0.34	4.07	0.0107237	0.0269539	-0.34	0.0160305
SQSTM1	ENSG00000161011	sequestosome 1	protein_coding	-0.34	8.05	0.000864054	1.12712e-05	-0.49	0.000117658
C22orf39	ENSG00000242259	chromosome 22 open reading frame 39	protein_coding	-0.34	5.24	0.00352981	0.000767531	-0.37	0.00881069
MSRB2	ENSG00000148450	methionine sulfoxide reductase B2	protein_coding	-0.34	4.98	0.0121121	0.00828476	-0.35	0.0131946
BBS2	ENSG00000125124	Bardet-Biedl syndrome 2	protein_coding	-0.34	5.47	0.00691526	2.02182e-06	-0.46	0.000470463
NOL4L	ENSG00000197183	nucleolar protein 4 like	protein_coding	-0.34	4.7	0.00307448	0.00216808	-0.38	0.00597887
AKAP11	ENSG00000023516	A-kinase anchoring protein 11	protein_coding	-0.33	6.2	0.0465454	0.0329931	-0.29	0.0554101
PCGF6	ENSG00000156374	polycomb group ring finger 6	protein_coding	-0.33	2.7	0.00468806	0.000240277	-0.39	0.00517162
ERO1A	ENSG00000197930	endoplasmic reticulum oxidoreductase 1 alpha	protein_coding	-0.33	5.31	0.0141666	0.0105588	-0.31	0.0339903
CCNB1IP1	ENSG00000100814	cyclin B1 interacting protein 1	protein_coding	-0.32	4.91	0.00647796	0.00499081	-0.4	0.00317193
ABTB1	ENSG00000114626	ankyrin repeat and BTB domain containing 1	protein_coding	-0.32	4.82	0.0111682	0.000319697	-0.36	0.0101249
GIN1	ENSG00000145723	gypsy retrotransposon integrase 1	protein_coding	-0.32	2.89	0.0037387	0.00105439	-0.39	0.00446675
NGRN	ENSG00000182768	neugrin, neurite outgrowth associated	protein_coding	-0.31	5.81	0.000565001	0.000121957	-0.49	0.000123889
OSBPL1A	ENSG00000141447	oxysterol binding protein like 1A	protein_coding	-0.31	5.79	0.00299285	0.0022933	-0.37	0.00767762
SLC35E4	ENSG00000100036	solute carrier family 35 member E4	protein_coding	-0.31	1.73	0.021258	0.00645785	-0.33	0.0205721
TMEM231	ENSG00000205084	transmembrane protein 231	protein_coding	-0.31	3.84	0.0290439	0.00105439	-0.39	0.00480607
KIZ	ENSG00000088970	kizuna centrosomal protein	protein_coding	-0.31	4.58	0.00457794	0.00360705	-0.34	0.0175789
RAP2C	ENSG00000123728	RAP2C, member of RAS oncogene family	protein_coding	-0.3	4.48	0.00235277	0.00447755	-0.42	0.00157495
SPIN1	ENSG00000106723	spindlin 1	protein_coding	-0.3	7	0.00012291	5.04194e-05	-0.55	9.00445e-06
IGIP	ENSG00000182700	IgA inducing protein	protein_coding	-0.3	4.42	0.00593846	0.00360705	-0.38	0.00576225
LNP1	ENSG00000206535	leukemia NUP98 fusion partner 1	protein_coding	-0.3	1.95	0.0451896	0.0357581	-0.27	0.0769856
KLHL2	ENSG00000109466	kelch like family member 2	protein_coding	-0.3	4.18	0.00835346	0.000368453	-0.39	0.00430865
MORC3	ENSG00000159256	MORC family CW-type zinc finger 3	protein_coding	-0.29	5.32	0.00541759	9.61399e-05	-0.36	0.00944364
TOMM40L	ENSG00000158882	translocase of outer mitochondrial membrane 40 like	protein_coding	-0.29	3.89	0.0166748	0.0100811	-0.37	0.00794114
WDR82	ENSG00000164091	WD repeat domain 82	protein_coding	-0.28	7.27	0.00157178	0.000223079	-0.54	1.46248e-05
RIT1	ENSG00000143622	Ras like without CAAX 1	protein_coding	-0.28	4.71	0.00468255	0.000319697	-0.47	0.000321071
HAUS4	ENSG00000092036	HAUS augmin like complex subunit 4	protein_coding	-0.28	4.35	0.0264706	0.00424223	-0.36	0.00977267
VEZF1	ENSG00000136451	vascular endothelial zinc finger 1	protein_coding	-0.27	6.24	0.0357585	0.000142294	-0.33	0.0205721
TRAPPC6B	ENSG00000182400	trafficking protein particle complex 6B	protein_coding	-0.27	4.88	0.00189926	0.000871419	-0.48	0.000196206
KCTD6	ENSG00000168301	potassium channel tetramerization domain containing 6	protein_coding	-0.27	2.85	0.00875684	0.0022933	-0.39	0.0041416
B3GLCT	ENSG00000187676	beta 3-glucosyltransferase	protein_coding	-0.27	3.46	0.0192278	0.00914711	-0.38	0.00555594
NRBP1	ENSG00000115216	nuclear receptor binding protein 1	protein_coding	-0.26	6.7	0.00131859	0.000104097	-0.45	0.000516065
BRMS1L	ENSG00000100916	BRMS1 like transcriptional repressor	protein_coding	-0.26	3.51	0.0243877	0.0121378	-0.3	0.0448381
ZDHHC3	ENSG00000163812	zinc finger DHHC-type palmitoyltransferase 3	protein_coding	-0.25	6.24	0.0325709	0.00181931	-0.3	0.0472526
DDX24	ENSG00000089737	DEAD-box helicase 24	protein_coding	-0.25	7.66	0.00881712	0.00401963	-0.36	0.0101249
SOCS6	ENSG00000170677	suppressor of cytokine signaling 6	protein_coding	-0.24	4.92	0.0322785	0.00583098	-0.31	0.0370163
ZMYND11	ENSG00000015171	zinc finger MYND-type containing 11	protein_coding	-0.24	7.18	0.0184206	0.000929516	-0.3	0.0401839
STK38	ENSG00000112079	serine/threonine kinase 38	protein_coding	-0.24	5.41	0.0175522	0.00341981	-0.31	0.0349812
PIBF1	ENSG00000083535	progesterone immunomodulatory binding factor 1	protein_coding	-0.24	4.48	0.0228529	0.00105439	-0.34	0.0155289
MAP4K5	ENSG00000012983	mitogen-activated protein kinase kinase kinase kinase 5	protein_coding	-0.24	5.45	0.0107025	0.00401963	-0.31	0.0330172
H3-3B	ENSG00000132475	H3,3 histone B	protein_coding	-0.24	9.07	0.00161225	0.000421634	-0.46	0.000449455
LIAS	ENSG00000121897	lipoic acid synthetase	protein_coding	-0.23	3.12	0.0275229	0.0110517	-0.35	0.0127561
PI4K2A	ENSG00000155252	phosphatidylinositol 4-kinase type 2 alpha	protein_coding	-0.23	4.72	0.0318832	0.00161812	-0.34	0.0175789
MIER1	ENSG00000198160	MIER1 transcriptional regulator	protein_coding	-0.23	5.72	0.0307919	0.0175542	-0.34	0.0175789
DENND6A	ENSG00000174839	DENN domain containing 6A	protein_coding	-0.23	4.91	0.0301983	0.0110517	-0.3	0.0484832
N4BP2L2	ENSG00000244754	NEDD4 binding protein 2 like 2	protein_coding	-0.23	6.25	0.0390688	0.00360705	-0.37	0.00822707
ATP6AP2	ENSG00000182220	ATPase H+ transporting accessory protein 2	protein_coding	-0.22	7.21	0.0268627	0.012702	-0.33	0.0225874
SMIM12	ENSG00000163866	small integral membrane protein 12	protein_coding	-0.22	4.35	0.0422181	0.0115934	-0.34	0.0165217
CNEP1R1	ENSG00000205423	CTD nuclear envelope phosphatase 1 regulatory subunit 1	protein_coding	-0.22	3.16	0.0263174	0.012702	-0.37	0.00794114
SEPTIN8	ENSG00000164402	septin 8	protein_coding	-0.21	5.65	0.0238487	0.00613803	-0.35	0.0145503
ZDHHC17	ENSG00000186908	zinc finger DHHC-type palmitoyltransferase 17	protein_coding	-0.2	5.02	0.0328805	0.00789261	-0.31	0.0320716
FBXW7	ENSG00000109670	F-box and WD repeat domain containing 7	protein_coding	-0.18	4.06	0.0412536	0.0100811	-0.31	0.0339903
RHOA	ENSG00000067560	ras homolog family member A	protein_coding	-0.17	8.77	0.0399844	0.00119295	-0.34	0.0181594
ZNF638	ENSG00000075292	zinc finger protein 638	protein_coding	0.15	6.77	0.0489273	0.0121378	0.3	0.0412351
SCFD2	ENSG00000184178	sec1 family domain containing 2	protein_coding	0.18	4.09	0.0465063	0.0110517	0.38	0.00667083
ARF3	ENSG00000134287	ADP ribosylation factor 3	protein_coding	0.19	7.91	0.0381503	0.0183564	0.28	0.0662622
ERGIC2	ENSG00000087502	ERGIC and golgi 2	protein_coding	0.19	5.94	0.0480147	0.00914711	0.36	0.0104711
BAP1	ENSG00000163930	BRCA1 associated protein 1	protein_coding	0.2	6.43	0.00492093	0.000767531	0.42	0.00164565
UBE2K	ENSG00000078140	ubiquitin conjugating enzyme E2 K	protein_coding	0.2	6.58	0.0195047	0.000451634	0.34	0.0160305
DAP3	ENSG00000132676	death associated protein 3	protein_coding	0.2	6.62	0.0299008	0.00869812	0.4	0.00293093
FBXW2	ENSG00000119402	F-box and WD repeat domain containing 2	protein_coding	0.2	6.37	0.0242302	0.0071382	0.37	0.00741405
EXD2	ENSG00000081177	exonuclease 3'-5' domain containing 2	protein_coding	0.2	5.62	0.0172531	0.00869812	0.39	0.0041416
HMOX2	ENSG00000103415	heme oxygenase 2	protein_coding	0.2	5.63	0.0421731	0.00914711	0.28	0.0732283
HNRNPU	ENSG00000153187	heterogeneous nuclear ribonucleoprotein U	protein_coding	0.21	8.72	0.029331	0.00181931	0.42	0.00164565
NOL10	ENSG00000115761	nucleolar protein 10	protein_coding	0.21	5.06	0.00434199	2.1425e-05	0.47	0.000321071
CCDC43	ENSG00000180329	coiled-coil domain containing 43	protein_coding	0.21	4.53	0.0273524	0.000718092	0.38	0.00576225
TXLNA	ENSG00000084652	taxilin alpha	protein_coding	0.21	6.59	0.00327855	5.04194e-05	0.45	0.000713223
XIAP	ENSG00000101966	X-linked inhibitor of apoptosis	protein_coding	0.22	6.52	0.02008	0.00678033	0.33	0.0239471
TOMM20	ENSG00000173726	translocase of outer mitochondrial membrane 20	protein_coding	0.22	8.19	0.0355629	0.00193142	0.36	0.00944364
BSDC1	ENSG00000160058	BSD domain containing 1	protein_coding	0.22	7	0.00382891	0.000165671	0.43	0.00121758
SCAF4	ENSG00000156304	SR-related CTD associated factor 4	protein_coding	0.22	5.32	0.0175938	0.00381366	0.37	0.00881069
CBLB	ENSG00000114423	Cbl proto-oncogene B	protein_coding	0.22	4.74	0.0329217	0.00869812	0.35	0.0150343
RC3H2	ENSG00000056586	ring finger and CCCH-type domains 2	protein_coding	0.23	5.75	0.0497882	0.0238209	0.31	0.0320716
TMEM129	ENSG00000168936	transmembrane protein 129, E3 ubiquitin ligase	protein_coding	0.23	6.34	0.0217773	0.00288559	0.36	0.0101249
CDK16	ENSG00000102225	cyclin dependent kinase 16	protein_coding	0.23	6.31	0.019993	0.00305782	0.4	0.00305149
FBXO42	ENSG00000037637	F-box protein 42	protein_coding	0.23	5.75	0.0050343	0.0100811	0.39	0.00430865
ZNF227	ENSG00000131115	zinc finger protein 227	protein_coding	0.23	4.03	0.0181407	0.00613803	0.38	0.00597887
NUFIP2	ENSG00000108256	nuclear FMR1 interacting protein 2	protein_coding	0.24	6.58	0.0347971	0.030453	0.28	0.0645645
ACTR8	ENSG00000113812	actin related protein 8	protein_coding	0.24	4.64	0.0447417	0.00789261	0.26	0.103257
NUP98	ENSG00000110713	nucleoporin 98 and 96 precursor	protein_coding	0.24	7.07	0.0093865	0.0105588	0.34	0.0155289
EIF2A	ENSG00000144895	eukaryotic translation initiation factor 2A	protein_coding	0.24	6.9	0.0194278	0.000451634	0.46	0.000492392
PIGV	ENSG00000060642	phosphatidylinositol glycan anchor biosynthesis class V	protein_coding	0.24	5.03	0.0111034	0.0022933	0.35	0.0150343
ELMO2	ENSG00000062598	engulfment and cell motility 2	protein_coding	0.25	6.3	0.00539141	0.000451634	0.4	0.0035599
MKNK2	ENSG00000099875	MAPK interacting serine/threonine kinase 2	protein_coding	0.25	7.94	0.0351889	0.0269539	0.33	0.019924
RCOR1	ENSG00000089902	REST corepressor 1	protein_coding	0.25	5.42	0.0308738	0.00525639	0.36	0.0104711
TAF4	ENSG00000130699	TATA-box binding protein associated factor 4	protein_coding	0.25	4.23	0.0144469	0.00424223	0.45	0.000541144
ZBTB33	ENSG00000177485	zinc finger and BTB domain containing 33	protein_coding	0.25	5.1	0.0341031	0.00204666	0.36	0.0104711
ATPAF1	ENSG00000123472	ATP synthase mitochondrial F1 complex assembly factor 1	protein_coding	0.25	6.09	0.00205905	3.33837e-05	0.47	0.000321071
PROSER1	ENSG00000120685	proline and serine rich 1	protein_coding	0.25	5.44	0.0434128	0.0218327	0.3	0.0436217
ZNF91	ENSG00000167232	zinc finger protein 91	protein_coding	0.25	4.93	0.0235152	0.0110517	0.35	0.0131946
MINDY3	ENSG00000148481	MINDY lysine 48 deubiquitinase 3	protein_coding	0.25	5.2	0.0201383	0.0329931	0.36	0.0108333
CELF1	ENSG00000149187	CUGBP Elav-like family member 1	protein_coding	0.26	6.88	0.00237165	0.000297935	0.49	0.000152188
UBA6	ENSG00000033178	ubiquitin like modifier activating enzyme 6	protein_coding	0.26	5.55	0.00882196	0.00288559	0.36	0.0108333
HSPA9	ENSG00000113013	heat shock protein family A (Hsp70) member 9	protein_coding	0.27	8.14	0.00326682	0.000192439	0.49	0.000160171
RBM12	ENSG00000244462	RNA binding motif protein 12	protein_coding	0.27	6.66	0.0201657	0.00789261	0.33	0.0246928
ZNF260	ENSG00000254004	zinc finger protein 260	protein_coding	0.27	4.81	0.0230419	0.000142294	0.38	0.00597887
SERBP1	ENSG00000142864	SERPINE1 mRNA binding protein 1	protein_coding	0.28	8.15	0.000217588	1.79854e-05	0.53	1.85572e-05
SLC11A2	ENSG00000110911	solute carrier family 11 member 2	protein_coding	0.28	6.6	0.0144871	0.00341981	0.43	0.00132988
ATXN7	ENSG00000163635	ataxin 7	protein_coding	0.28	5.04	0.0409521	0.0434428	0.29	0.0525211
SURF4	ENSG00000148248	surfeit 4	protein_coding	0.28	8.5	0.00740626	5.04194e-05	0.36	0.0101249
YES1	ENSG00000176105	YES proto-oncogene 1, Src family tyrosine kinase	protein_coding	0.28	6.14	0.01045	7.02704e-05	0.45	0.000680102
TXNDC12	ENSG00000117862	thioredoxin domain containing 12	protein_coding	0.28	6.24	0.0163197	0.00472447	0.34	0.0187378
RNF103	ENSG00000239305	ring finger protein 103	protein_coding	0.28	6.33	0.0167857	0.00181931	0.49	0.000137486
CARNMT1	ENSG00000156017	carnosine N-methyltransferase 1	protein_coding	0.28	4.53	0.00586188	0.000343955	0.45	0.000593332
LMAN1	ENSG00000074695	lectin, mannose binding 1	protein_coding	0.29	8.06	0.0424253	0.0228166	0.26	0.0943614
ASB13	ENSG00000196372	ankyrin repeat and SOCS box containing 13	protein_coding	0.29	4.76	0.0194732	0.00914711	0.29	0.0554101
PLEKHA8	ENSG00000106086	pleckstrin homology domain containing A8	protein_coding	0.29	3.58	0.0200897	0.00645785	0.33	0.0232659
GPHN	ENSG00000171723	gephyrin	protein_coding	0.29	4.81	0.00166133	0.000178993	0.43	0.00106879
ANGEL1	ENSG00000013523	angel homolog 1	protein_coding	0.29	4.74	0.0050789	0.00401963	0.42	0.00164565
IARS2	ENSG00000067704	isoleucyl-tRNA synthetase 2, mitochondrial	protein_coding	0.29	6.99	0.00766219	0.00193142	0.43	0.00132988
SFPQ	ENSG00000116560	splicing factor proline and glutamine rich	protein_coding	0.3	7.94	0.00137632	4.65756e-05	0.45	0.000516065
GPATCH4	ENSG00000160818	G-patch domain containing 4	protein_coding	0.3	5.01	0.00864492	0.00243316	0.38	0.00643704
ARHGAP18	ENSG00000146376	Rho GTPase activating protein 18	protein_coding	0.3	5.23	0.0366473	0.0280478	0.28	0.0679462
EIF4B	ENSG00000063046	eukaryotic translation initiation factor 4B	protein_coding	0.31	8.96	0.0005201	0.000516437	0.48	0.000240953
AAAS	ENSG00000094914	aladin WD repeat nucleoporin	protein_coding	0.31	5.31	0.000406789	3.62569e-05	0.49	0.000145098
RNF24	ENSG00000101236	ring finger protein 24	protein_coding	0.31	5.64	0.0146646	0.0191569	0.37	0.00881069
STRN4	ENSG00000090372	striatin 4	protein_coding	0.31	6.81	0.000944619	0.000121957	0.44	0.000936608
ZNF75A	ENSG00000162086	zinc finger protein 75a	protein_coding	0.31	4.55	0.000514051	8.23356e-05	0.5	9.05969e-05
SEC24A	ENSG00000113615	SEC24 homolog A, COPII coat complex component	protein_coding	0.32	5.65	0.0195047	0.0105588	0.27	0.0840704
RAN	ENSG00000132341	RAN, member RAS oncogene family	protein_coding	0.32	7.48	0.0154604	0.00869812	0.34	0.0165217
SARS2	ENSG00000104835	seryl-tRNA synthetase 2, mitochondrial	protein_coding	0.32	2.55	0.0387803	0.0386248	0.28	0.069672
EP300	ENSG00000100393	E1A binding protein p300	protein_coding	0.33	7.13	0.0238466	0.0167927	0.28	0.069672
PDPK1	ENSG00000140992	3-phosphoinositide dependent protein kinase 1	protein_coding	0.33	5.41	0.0103225	0.00401963	0.36	0.0115672
LARP4B	ENSG00000107929	La ribonucleoprotein 4B	protein_coding	0.33	6.59	0.00120975	0.000165671	0.52	4.39969e-05
ACP6	ENSG00000162836	acid phosphatase 6, lysophosphatidic	protein_coding	0.33	4.66	0.0239362	0.000368453	0.32	0.026961
CAB39L	ENSG00000102547	calcium binding protein 39 like	protein_coding	0.33	7.2	0.0167962	0.00613803	0.31	0.0359727
SUMF1	ENSG00000144455	sulfatase modifying factor 1	protein_coding	0.33	5.93	0.00230686	5.96611e-05	0.43	0.00132988
SCAMP4	ENSG00000227500	secretory carrier membrane protein 4	protein_coding	0.33	7	0.00868783	0.00360705	0.34	0.0175789
ASPSCR1	ENSG00000169696	ASPSCR1 tether for SLC2A4, UBX domain containing	protein_coding	0.33	5.02	0.0188879	0.00750043	0.26	0.0965871
PDIK1L	ENSG00000175087	PDLIM1 interacting kinase 1 like	protein_coding	0.34	4.14	0.00775641	0.000319697	0.34	0.0181594
MED1	ENSG00000125686	mediator complex subunit 1	protein_coding	0.34	5.63	0.0195104	0.00381366	0.33	0.0246928
SRP72	ENSG00000174780	signal recognition particle 72	protein_coding	0.34	6.92	0.00135163	1.96007e-05	0.44	0.000746307
UBN2	ENSG00000157741	ubinuclein 2	protein_coding	0.34	5.25	0.00680583	0.00869812	0.34	0.0181594
ATP6V1E2	ENSG00000250565	ATPase H+ transporting V1 subunit E2	protein_coding	0.34	3.43	0.000690607	0.000258085	0.46	0.000407262
MARCHF6	ENSG00000145495	membrane associated ring-CH-type finger 6	protein_coding	0.34	7.3	0.000453373	0.000343955	0.42	0.00187126
TDG	ENSG00000139372	thymine DNA glycosylase	protein_coding	0.35	4.16	0.0144103	0.00552537	0.29	0.0525211
TM9SF1	ENSG00000100926	transmembrane 9 superfamily member 1	protein_coding	0.35	3.42	0.00361427	0.000673328	0.45	0.000650583
ARL6IP1	ENSG00000170540	ADP ribosylation factor like GTPase 6 interacting protein 1	protein_coding	0.35	7.53	0.0159266	0.00243316	0.37	0.00794114
RBM12B	ENSG00000183808	RNA binding motif protein 12B	protein_coding	0.35	4.25	0.00429858	0.000871419	0.38	0.00576225
ZNF623	ENSG00000183309	zinc finger protein 623	protein_coding	0.35	5.17	0.0140975	0.00288559	0.27	0.080786
MICALL2	ENSG00000164877	MICAL like 2	protein_coding	0.35	4.93	0.021258	0.0258831	0.36	0.01119
NDST1	ENSG00000070614	N-deacetylase and N-sulfotransferase 1	protein_coding	0.36	6.91	0.0140474	0.00789261	0.35	0.0123306
SETD7	ENSG00000145391	SET domain containing 7, histone lysine methyltransferase	protein_coding	0.36	7.77	0.0153069	0.000673328	0.35	0.0150343
USP42	ENSG00000106346	ubiquitin specific peptidase 42	protein_coding	0.36	4.2	0.0029437	0.00105439	0.44	0.000979719
ZNF22	ENSG00000165512	zinc finger protein 22	protein_coding	0.36	5.17	0.00610257	0.000153928	0.46	0.000492392
CDK12	ENSG00000167258	cyclin dependent kinase 12	protein_coding	0.36	6.07	0.00398472	0.00152142	0.39	0.00517162
NIN	ENSG00000100503	ninein	protein_coding	0.37	5.65	0.00237402	8.9001e-05	0.44	0.000979719
HDAC1	ENSG00000116478	histone deacetylase 1	protein_coding	0.37	7.44	0.000794632	0.000587634	0.39	0.00517162
LDHA	ENSG00000134333	lactate dehydrogenase A	protein_coding	0.37	8.16	0.0293688	0.00360705	0.33	0.0246928
MTHFD1	ENSG00000100714	methylenetetrahydrofolate dehydrogenase, cyclohydrolase and formyltetrahydrofolate synthetase 1	protein_coding	0.37	5.88	4.45956e-05	1.79854e-05	0.56	5.07086e-06
CBR4	ENSG00000145439	carbonyl reductase 4	protein_coding	0.37	4.97	0.0319452	0.030453	0.21	0.216549
MRPL15	ENSG00000137547	mitochondrial ribosomal protein L15	protein_coding	0.37	4.95	0.00370349	0.00341981	0.48	0.000240953
DCBLD1	ENSG00000164465	discoidin, CUB and LCCL domain containing 1	protein_coding	0.37	3.18	0.00774965	0.000991802	0.37	0.00715575
CXADR	ENSG00000154639	CXADR Ig-like cell adhesion molecule	protein_coding	0.38	6.91	0.0349269	0.000871419	0.35	0.0127561
TRIO	ENSG00000038382	trio Rho guanine nucleotide exchange factor	protein_coding	0.38	6.36	0.00902839	0.00305782	0.36	0.00977267
SPATA2	ENSG00000158480	spermatogenesis associated 2	protein_coding	0.38	4.87	0.0012603	0.0017163	0.42	0.00164565
SPTLC2	ENSG00000100596	serine palmitoyltransferase long chain base subunit 2	protein_coding	0.38	6.47	0.00044341	1.63596e-05	0.46	0.000492392
GSE1	ENSG00000131149	Gse1 coiled-coil protein	protein_coding	0.39	6.72	0.00277085	0.00789261	0.37	0.00912223
EPN3	ENSG00000049283	epsin 3	protein_coding	0.39	5.99	0.0276699	0.00447755	0.35	0.0150343
GCAT	ENSG00000100116	glycine C-acetyltransferase	protein_coding	0.39	5.78	0.0411763	0.0343475	0.28	0.0645645
PARP8	ENSG00000151883	poly(ADP-ribose) polymerase family member 8	protein_coding	0.4	5.43	0.00863216	0.000319697	0.37	0.00881069
TRIM33	ENSG00000197323	tripartite motif containing 33	protein_coding	0.4	6.29	0.000658661	0.000929516	0.39	0.00498396
TIFA	ENSG00000145365	TRAF interacting protein with forkhead associated domain	protein_coding	0.4	4.44	0.0426403	0.0110517	0.38	0.00691133
ACTR3B	ENSG00000133627	actin related protein 3B	protein_coding	0.4	3.21	0.00642511	0.00472447	0.5	8.12124e-05
MAP4K4	ENSG00000071054	mitogen-activated protein kinase kinase kinase kinase 4	protein_coding	0.4	6.33	0.00120503	2.79808e-05	0.44	0.000746307
SDSL	ENSG00000139410	serine dehydratase like	protein_coding	0.4	4.31	0.0069817	0.00135209	0.34	0.0170479
ARHGDIA	ENSG00000141522	Rho GDP dissociation inhibitor alpha	protein_coding	0.41	7.92	2.44116e-05	1.23999e-05	0.53	1.85572e-05
AK4	ENSG00000162433	adenylate kinase 4	protein_coding	0.41	6.44	0.0252739	0.00960035	0.31	0.0330172
HLTF	ENSG00000071794	helicase like transcription factor	protein_coding	0.41	5.98	0.00439515	2.79808e-05	0.37	0.00881069
TMEM87B	ENSG00000153214	transmembrane protein 87B	protein_coding	0.41	7.04	0.00336989	0.000258085	0.43	0.0011662
GTF3C6	ENSG00000155115	general transcription factor IIIC subunit 6	protein_coding	0.41	6.26	0.0258323	0.00960035	0.31	0.0349812
ZNF721	ENSG00000182903	zinc finger protein 721	protein_coding	0.41	4.35	0.000180987	3.62569e-05	0.55	9.58463e-06
POM121C	ENSG00000272391	POM121 transmembrane nucleoporin C	protein_coding	0.41	5.43	0.000244898	5.96611e-05	0.48	0.000229242
WDR37	ENSG00000047056	WD repeat domain 37	protein_coding	0.42	4.75	0.00212458	0.000484355	0.42	0.00203407
CCDC88C	ENSG00000015133	coiled-coil domain containing 88C	protein_coding	0.42	6.1	0.0105395	0.00257471	0.38	0.00555594
CHD1L	ENSG00000131778	chromodomain helicase DNA binding protein 1 like	protein_coding	0.42	5.43	0.000262818	0.000121957	0.47	0.000279073
TACSTD2	ENSG00000184292	tumor associated calcium signal transducer 2	protein_coding	0.43	8.93	0.0155384	0.00288559	0.36	0.00977267
NET1	ENSG00000173848	neuroepithelial cell transforming 1	protein_coding	0.43	7.3	0.00745286	0.0121378	0.28	0.0732283
LARGE2	ENSG00000165905	LARGE xylosyl- and glucuronyltransferase 2	protein_coding	0.43	5.48	0.0207011	0.0175542	0.35	0.0123306
CNOT6	ENSG00000113300	CCR4-NOT transcription complex subunit 6	protein_coding	0.44	5.9	5.23088e-05	1.35633e-05	0.55	1.01733e-05
ASIC1	ENSG00000110881	acid sensing ion channel subunit 1	protein_coding	0.44	3.49	0.0361202	0.0167927	0.33	0.0232659
RRP1	ENSG00000160214	ribosomal RNA processing 1	protein_coding	0.44	4.82	2.78312e-05	3.86319e-06	0.52	2.97314e-05
SGO2	ENSG00000163535	shugoshin 2	protein_coding	0.44	2	0.0412587	0.000368453	0.31	0.038
TAF1D	ENSG00000166012	TATA-box binding protein associated factor, RNA polymerase I subunit D	protein_coding	0.45	5.37	0.00246705	4.75591e-06	0.5	0.000105737
CPT2	ENSG00000157184	carnitine palmitoyltransferase 2	protein_coding	0.45	5.23	0.000157767	3.33837e-05	0.5	9.05969e-05
CKAP2	ENSG00000136108	cytoskeleton associated protein 2	protein_coding	0.45	4.13	0.0346751	0.00525639	0.32	0.0277311
RNF125	ENSG00000101695	ring finger protein 125	protein_coding	0.45	3.63	0.00718344	0.00243316	0.36	0.0101249
LRRC59	ENSG00000108829	leucine rich repeat containing 59	protein_coding	0.45	7.39	0.000207163	2.34632e-05	0.54	1.21931e-05
NDC1	ENSG00000058804	NDC1 transmembrane nucleoporin	protein_coding	0.45	4.61	0.000155548	2.79808e-05	0.5	8.58552e-05
SHTN1	ENSG00000187164	shootin 1	protein_coding	0.45	5.91	0.00490861	0.000343955	0.41	0.00239643
CLPB	ENSG00000162129	caseinolytic mitochondrial matrix peptidase chaperone subunit B	protein_coding	0.46	3.79	0.000339679	0.000207215	0.46	0.000449455
ASNS	ENSG00000070669	asparagine synthetase (glutamine-hydrolyzing)	protein_coding	0.46	4.64	0.000215746	0.0017163	0.47	0.000265288
TCEA3	ENSG00000204219	transcription elongation factor A3	protein_coding	0.46	6.94	0.00364241	0.000142294	0.48	0.000196206
ALG8	ENSG00000159063	ALG8 alpha-1,3-glucosyltransferase	protein_coding	0.46	5.4	0.000321057	0.000178993	0.51	5.22851e-05
TRIQK	ENSG00000205133	triple QxxK/R motif containing	protein_coding	0.46	5.98	0.000724916	0.000451634	0.53	2.2138e-05
FKBP5	ENSG00000096060	FKBP prolyl isomerase 5	protein_coding	0.47	8.47	0.0383927	0.0133182	0.26	0.100964
MPI	ENSG00000178802	mannose phosphate isomerase	protein_coding	0.47	6.11	4.34001e-06	2.83471e-06	0.57	3.41444e-06
KDELR2	ENSG00000136240	KDEL endoplasmic reticulum protein retention receptor 2	protein_coding	0.47	8.73	9.21389e-05	2.1425e-05	0.49	0.000137486
PDCD11	ENSG00000148843	programmed cell death 11	protein_coding	0.47	5.64	0.000126483	0.000258085	0.51	6.88119e-05
PHF14	ENSG00000106443	PHD finger protein 14	protein_coding	0.48	5.57	4.22459e-06	5.78647e-06	0.6	7.46979e-07
CPD	ENSG00000108582	carboxypeptidase D	protein_coding	0.48	7.64	0.000656871	0.000550382	0.45	0.000713223
CEP83	ENSG00000173588	centrosomal protein 83	protein_coding	0.48	3.1	0.000498766	0.000104097	0.54	1.46248e-05
CCDC186	ENSG00000165813	coiled-coil domain containing 186	protein_coding	0.48	6.36	0.00350499	0.012702	0.33	0.0205721
RERE	ENSG00000142599	arginine-glutamic acid dipeptide repeats	protein_coding	0.49	8.62	3.30265e-05	7.62747e-05	0.54	1.29956e-05
ADAM9	ENSG00000168615	ADAM metallopeptidase domain 9	protein_coding	0.49	7.53	0.014449	0.00552537	0.29	0.0525211
ABCA1	ENSG00000165029	ATP binding cassette subfamily A member 1	protein_coding	0.49	4.8	0.0461815	0.0434428	0.27	0.0750475
ARF6	ENSG00000165527	ADP ribosylation factor 6	protein_coding	0.49	7.64	6.40977e-06	1.44185e-06	0.59	1.06037e-06
BCOR	ENSG00000183337	BCL6 corepressor	protein_coding	0.49	6.25	0.00288495	0.000673328	0.37	0.00794114
SCARB2	ENSG00000138760	scavenger receptor class B member 2	protein_coding	0.5	9.19	2.29475e-05	4.75591e-06	0.55	9.58463e-06
STYK1	ENSG00000060140	serine/threonine/tyrosine kinase 1	protein_coding	0.5	4.7	0.0278724	0.012702	0.36	0.00977267
CTU1	ENSG00000142544	cytosolic thiouridylase subunit 1	protein_coding	0.5	1.42	0.000780435	1.79854e-05	0.5	8.12124e-05
NFXL1	ENSG00000170448	nuclear transcription factor, X-box binding like 1	protein_coding	0.5	4.08	0.00052359	4.2983e-05	0.47	0.000352934
CEMIP2	ENSG00000135048	cell migration inducing hyaluronidase 2	protein_coding	0.5	5.82	0.021988	0.0105588	0.36	0.0101249
PABPC1	ENSG00000070756	poly(A) binding protein cytoplasmic 1	protein_coding	0.51	10.58	0.000175485	0.000258085	0.56	5.38461e-06
YOD1	ENSG00000180667	YOD1 deubiquitinase	protein_coding	0.51	3.68	5.64772e-05	5.70751e-07	0.55	9.00445e-06
SLC35F5	ENSG00000115084	solute carrier family 35 member F5	protein_coding	0.51	6.23	0.000266091	0.000421634	0.48	0.000177283
PRRT3	ENSG00000163704	proline rich transmembrane protein 3	protein_coding	0.51	3.79	0.00226178	0.0022933	0.33	0.0212086
EPHB3	ENSG00000182580	EPH receptor B3	protein_coding	0.51	5.51	0.0275091	0.0121378	0.37	0.00794114
ANKRD52	ENSG00000139645	ankyrin repeat domain 52	protein_coding	0.53	6.12	0.000421101	3.33837e-05	0.42	0.00157495
LMO7	ENSG00000136153	LIM domain 7	protein_coding	0.53	6.54	0.00408067	0.0191569	0.31	0.0370163
PRRC2A	ENSG00000204469	proline rich coiled-coil 2A	protein_coding	0.53	8.86	1.13224e-06	3.86319e-06	0.64	3.86948e-08
COBLL1	ENSG00000082438	cordon-bleu WH2 repeat protein like 1	protein_coding	0.53	7.05	0.00237937	0.00216808	0.41	0.00230058
AGPAT3	ENSG00000160216	1-acylglycerol-3-phosphate O-acyltransferase 3	protein_coding	0.53	6.76	5.67158e-06	0.000121957	0.57	3.91296e-06
PM20D2	ENSG00000146281	peptidase M20 domain containing 2	protein_coding	0.53	6.76	0.00579836	0.00243316	0.4	0.00342323
B3GAT3	ENSG00000149541	beta-1,3-glucuronyltransferase 3	protein_coding	0.53	5.88	0.000646998	0.000319697	0.37	0.00767762
CTH	ENSG00000116761	cystathionine gamma-lyase	protein_coding	0.54	3.23	0.00108596	3.33837e-05	0.46	0.000449455
EIF2AK3	ENSG00000172071	eukaryotic translation initiation factor 2 alpha kinase 3	protein_coding	0.54	5.76	3.76318e-05	7.70176e-06	0.56	5.38461e-06
TRNT1	ENSG00000072756	tRNA nucleotidyl transferase 1	protein_coding	0.54	4.71	0.0122764	0.0451602	0.23	0.155879
GSTZ1	ENSG00000100577	glutathione S-transferase zeta 1	protein_coding	0.55	5.54	0.0012143	0.000207215	0.43	0.00138889
YBEY	ENSG00000182362	ybeY metalloendoribonuclease	protein_coding	0.55	3.8	0.000453576	1.15271e-06	0.49	0.000152188
CRYBG1	ENSG00000112297	crystallin beta-gamma domain containing 1	protein_coding	0.55	7.79	0.0267321	0.00181931	0.37	0.00881069
WASF3	ENSG00000132970	WASP family member 3	protein_coding	0.56	5.51	0.000475284	4.65756e-05	0.52	3.1525e-05
XPOT	ENSG00000184575	exportin for tRNA	protein_coding	0.56	6.66	1.77714e-07	6.42498e-07	0.65	2.19075e-08
SYVN1	ENSG00000162298	synoviolin 1	protein_coding	0.56	6.99	1.98144e-05	3.06238e-05	0.59	1.13162e-06
ZNF618	ENSG00000157657	zinc finger protein 618	protein_coding	0.56	4.67	0.0013974	0.00112039	0.37	0.00715575
GPR89B	ENSG00000188092	G protein-coupled receptor 89B	protein_coding	0.56	1.58	0.000129647	3.06238e-05	0.49	0.0001115
LMNB1	ENSG00000113368	lamin B1	protein_coding	0.57	3.68	0.046972	0.00914711	0.49	0.000160171
SOAT1	ENSG00000057252	sterol O-acyltransferase 1	protein_coding	0.57	7.38	0.000365454	3.62569e-05	0.5	0.000100402
CPEB3	ENSG00000107864	cytoplasmic polyadenylation element binding protein 3	protein_coding	0.57	4.73	0.00277422	0.0434428	0.21	0.224257
GGCT	ENSG00000006625	gamma-glutamylcyclotransferase	protein_coding	0.57	5.56	0.0289593	6.4725e-05	0.57	3.65758e-06
ZNF680	ENSG00000173041	zinc finger protein 680	protein_coding	0.57	4.92	0.0117265	0.00645785	0.34	0.0155289
TONSL	ENSG00000160949	tonsoku like, DNA repair protein	protein_coding	0.57	3.31	0.000387671	0.000516437	0.53	2.80449e-05
MYO5C	ENSG00000128833	myosin VC	protein_coding	0.57	6.37	0.000212332	0.000240277	0.51	5.53418e-05
PSD3	ENSG00000156011	pleckstrin and Sec7 domain containing 3	protein_coding	0.58	5.31	0.00190213	0.00272713	0.35	0.0119412
CDK6	ENSG00000105810	cyclin dependent kinase 6	protein_coding	0.58	5.57	0.0221944	0.00914711	0.33	0.0212086
ACSL3	ENSG00000123983	acyl-CoA synthetase long chain family member 3	protein_coding	0.58	8.39	0.0042716	0.000343955	0.38	0.00667083
ABCC1	ENSG00000103222	ATP binding cassette subfamily C member 1	protein_coding	0.58	6.86	0.000145386	1.12712e-05	0.47	0.000279073
CYFIP2	ENSG00000055163	cytoplasmic FMR1 interacting protein 2	protein_coding	0.58	5.55	5.46345e-05	0.000178993	0.56	4.16777e-06
CLCF1	ENSG00000175505	cardiotrophin like cytokine factor 1	protein_coding	0.58	2.28	0.0148866	0.00960035	0.38	0.00667083
LRP11	ENSG00000120256	LDL receptor related protein 11	protein_coding	0.59	6.65	7.34484e-05	6.4725e-05	0.59	9.21446e-07
NUAK2	ENSG00000163545	NUAK family kinase 2	protein_coding	0.6	3.07	0.0120781	0.00613803	0.32	0.0262319
MARCHF3	ENSG00000173926	membrane associated ring-CH-type finger 3	protein_coding	0.6	1.53	0.00617829	0.00525639	0.4	0.00293093
PTPN13	ENSG00000163629	protein tyrosine phosphatase non-receptor type 13	protein_coding	0.61	6.65	0.00097628	0.000277228	0.42	0.00179426
TBL1XR1	ENSG00000177565	TBL1X receptor 1	protein_coding	0.61	7.75	5.102e-05	5.04194e-05	0.5	9.55207e-05
ZNF239	ENSG00000196793	zinc finger protein 239	protein_coding	0.61	2.88	0.000252302	0.000297935	0.46	0.000470463
FA2H	ENSG00000103089	fatty acid 2-hydroxylase	protein_coding	0.62	2.75	0.0114628	0.0167927	0.41	0.00259788
P4HA1	ENSG00000122884	prolyl 4-hydroxylase subunit alpha 1	protein_coding	0.62	5.82	1.83134e-05	1.44185e-06	0.59	1.29704e-06
DEGS1	ENSG00000143753	delta 4-desaturase, sphingolipid 1	protein_coding	0.62	7.57	0.00113236	0.00381366	0.34	0.0181594
CCNE2	ENSG00000175305	cyclin E2	protein_coding	0.62	0.62	0.00893369	0.00472447	0.3	0.0424496
KDM7A	ENSG00000006459	lysine demethylase 7A	protein_coding	0.63	5.16	1.29154e-05	7.02704e-05	0.52	4.16055e-05
NRIP1	ENSG00000180530	nuclear receptor interacting protein 1	protein_coding	0.64	6.48	0.000460177	0.000142294	0.39	0.00399208
DTX3L	ENSG00000163840	deltex E3 ubiquitin ligase 3L	protein_coding	0.64	6.49	3.42648e-07	1.34643e-07	0.65	3.57365e-08
MARVELD2	ENSG00000152939	MARVEL domain containing 2	protein_coding	0.64	5.29	8.76842e-06	1.27503e-06	0.57	3.41444e-06
IGFBP2	ENSG00000115457	insulin like growth factor binding protein 2	protein_coding	0.65	7.97	0.000936377	0.00447755	0.4	0.00329041
CLGN	ENSG00000153132	calmegin	protein_coding	0.65	5.75	0.0410316	0.0105588	0.33	0.019924
GLB1L2	ENSG00000149328	galactosidase beta 1 like 2	protein_coding	0.65	7.21	0.00277364	0.0022933	0.38	0.00597887
ATP11B	ENSG00000058063	ATPase phospholipid transporting 11B (putative)	protein_coding	0.66	7.22	6.50927e-05	5.96611e-05	0.51	6.16314e-05
ACSM3	ENSG00000005187	acyl-CoA synthetase medium chain family member 3	protein_coding	0.66	5.73	0.0445552	0.0100811	0.32	0.0285701
BAIAP2L1	ENSG00000006453	BAR/IMD domain containing adaptor protein 2 like 1	protein_coding	0.66	6.6	0.000330817	0.000104097	0.5	8.12124e-05
NLN	ENSG00000123213	neurolysin	protein_coding	0.66	4.83	1.74552e-05	9.10646e-07	0.59	1.20922e-06
GGACT	ENSG00000134864	gamma-glutamylamine cyclotransferase	protein_coding	0.66	2.8	3.34294e-06	3.62569e-05	0.56	6.54422e-06
MYO19	ENSG00000278259	myosin XIX	protein_coding	0.66	4.33	2.30255e-06	2.53463e-06	0.65	2.79585e-08
ECI2	ENSG00000198721	enoyl-CoA delta isomerase 2	protein_coding	0.67	6.35	2.1708e-06	2.53463e-06	0.58	2.45272e-06
LRRC8B	ENSG00000197147	leucine rich repeat containing 8 VRAC subunit B	protein_coding	0.67	5.27	2.53007e-05	6.42498e-07	0.61	4.51918e-07
UHRF1BP1	ENSG00000065060	UHRF1 binding protein 1	protein_coding	0.68	5.13	1.05368e-05	2.27033e-06	0.47	0.000252907
ITPR2	ENSG00000123104	inositol 1,4,5-trisphosphate receptor type 2	protein_coding	0.68	6.18	0.00190944	0.00424223	0.38	0.00535947
MAP7	ENSG00000135525	microtubule associated protein 7	protein_coding	0.68	6.89	5.09009e-05	1.029e-06	0.56	4.16777e-06
AVL9	ENSG00000105778	AVL9 cell migration associated	protein_coding	0.68	6.22	1.36612e-07	3.51703e-06	0.64	5.83096e-08
CENPI	ENSG00000102384	centromere protein I	protein_coding	0.69	-0.01	0.0320205	0.0269539	0.29	0.049806
PLCB4	ENSG00000101333	phospholipase C beta 4	protein_coding	0.69	5.28	0.00029502	3.33837e-05	0.59	9.21446e-07
ENC1	ENSG00000171617	ectodermal-neural cortex 1	protein_coding	0.7	6.2	0.00229674	0.000991802	0.39	0.00399208
RNF144A	ENSG00000151692	ring finger protein 144A	protein_coding	0.7	5.56	6.97136e-05	9.61399e-05	0.56	4.74597e-06
HYOU1	ENSG00000149428	hypoxia up-regulated 1	protein_coding	0.7	8.27	2.7063e-05	5.78647e-06	0.52	3.1525e-05
ZBTB42	ENSG00000179627	zinc finger and BTB domain containing 42	protein_coding	0.7	5.56	1.00506e-05	2.34632e-05	0.54	1.38479e-05
STK39	ENSG00000198648	serine/threonine kinase 39	protein_coding	0.7	6.81	0.000352679	1.03273e-05	0.48	0.000196206
GNE	ENSG00000159921	glucosamine (UDP-N-acetyl)-2-epimerase/N-acetylmannosamine kinase	protein_coding	0.71	6.78	0.00250428	0.0017163	0.42	0.00203407
RAB26	ENSG00000167964	RAB26, member RAS oncogene family	protein_coding	0.71	2.97	0.0165863	6.4725e-05	0.49	0.000152188
ALDH6A1	ENSG00000119711	aldehyde dehydrogenase 6 family member A1	protein_coding	0.71	7.18	8.24883e-06	1.03273e-05	0.55	7.93946e-06
ARID3A	ENSG00000116017	AT-rich interaction domain 3A	protein_coding	0.72	3.05	7.89586e-06	3.06238e-05	0.56	4.43413e-06
RHOU	ENSG00000116574	ras homolog family member U	protein_coding	0.72	7.13	0.00688034	0.0133182	0.29	0.0511779
SLC9A2	ENSG00000115616	solute carrier family 9 member A2	protein_coding	0.72	5.21	0.00332965	0.00119295	0.41	0.00212264
CYSRT1	ENSG00000197191	cysteine rich tail 1	protein_coding	0.72	0.81	0.00206079	0.000516437	0.37	0.00715575
ODC1	ENSG00000115758	ornithine decarboxylase 1	protein_coding	0.73	8.28	0.00131403	0.00193142	0.48	0.000206283
HLCS	ENSG00000159267	holocarboxylase synthetase	protein_coding	0.74	6.08	5.80729e-07	2.02182e-06	0.6	6.48744e-07
BGN	ENSG00000182492	biglycan	protein_coding	0.74	7.84	0.0121318	0.00678033	0.31	0.0330172
THRB	ENSG00000151090	thyroid hormone receptor beta	protein_coding	0.75	5.9	0.00176792	0.0292706	0.38	0.00667083
TECPR1	ENSG00000205356	tectonin beta-propeller repeat containing 1	protein_coding	0.75	6.33	0.000463673	0.000121957	0.59	1.29704e-06
ESRP1	ENSG00000104413	epithelial splicing regulatory protein 1	protein_coding	0.75	6.72	8.59476e-06	9.34876e-06	0.6	6.9617e-07
RHPN2	ENSG00000131941	rhophilin Rho GTPase binding protein 2	protein_coding	0.75	6.96	0.00163191	0.000165671	0.47	0.000279073
PMM2	ENSG00000140650	phosphomannomutase 2	protein_coding	0.76	3.84	5.29137e-07	5.58231e-08	0.62	2.11394e-07
NECTIN3	ENSG00000177707	nectin cell adhesion molecule 3	protein_coding	0.76	5.6	0.0184943	0.0022933	0.38	0.00555594
STRADB	ENSG00000082146	STE20 related adaptor beta	protein_coding	0.77	4.21	5.45949e-06	2.1425e-05	0.59	8.60895e-07
BCAM	ENSG00000187244	basal cell adhesion molecule (Lutheran blood group)	protein_coding	0.77	9.73	0.000231229	4.27225e-06	0.53	2.2138e-05
XYLB	ENSG00000093217	xylulokinase	protein_coding	0.77	2.65	1.26896e-07	5.70751e-07	0.69	2.43402e-09
STEAP1	ENSG00000164647	STEAP family member 1	protein_coding	0.77	6.9	0.00969516	0.000929516	0.5	0.000100402
KIF11	ENSG00000138160	kinesin family member 11	protein_coding	0.78	2.79	0.000934725	0.000142294	0.49	0.000137486
C1orf116	ENSG00000182795	chromosome 1 open reading frame 116	protein_coding	0.78	8.5	0.00192522	3.06238e-05	0.57	2.79726e-06
CENPO	ENSG00000138092	centromere protein O	protein_coding	0.8	2.81	2.26133e-08	2.02182e-06	0.67	8.34362e-09
KLK4	ENSG00000167749	kallikrein related peptidase 4	protein_coding	0.8	9.57	0.01544	0.00216808	0.41	0.00239643
CCNG2	ENSG00000138764	cyclin G2	protein_coding	0.81	7.42	1.28785e-05	2.83471e-06	0.53	2.34862e-05
GREB1	ENSG00000196208	growth regulating estrogen receptor binding 1	protein_coding	0.81	7.7	0.0210713	0.0269539	0.34	0.0160305
PMEPA1	ENSG00000124225	prostate transmembrane protein, androgen induced 1	protein_coding	0.81	9.66	0.00153824	0.000240277	0.51	6.52208e-05
PIK3AP1	ENSG00000155629	phosphoinositide-3-kinase adaptor protein 1	protein_coding	0.81	4.36	0.000199884	8.9001e-05	0.47	0.000252907
H4C8	ENSG00000158406	H4 clustered histone 8	protein_coding	0.81	2.8	0.0140531	0.00583098	0.35	0.0119412
MYC	ENSG00000136997	MYC proto-oncogene, bHLH transcription factor	protein_coding	0.84	6.7	0.00337395	0.00119295	0.49	0.000160171
POLQ	ENSG00000051341	DNA polymerase theta	protein_coding	0.84	0.18	0.0178615	0.0228166	0.34	0.0170479
CHMP4C	ENSG00000164695	charged multivesicular body protein 4C	protein_coding	0.86	4.78	1.18206e-05	2.27033e-06	0.55	8.45401e-06
PPP3CA	ENSG00000138814	protein phosphatase 3 catalytic subunit alpha	protein_coding	0.87	8.81	1.13806e-06	3.51703e-06	0.65	3.30066e-08
ATP11A	ENSG00000068650	ATPase phospholipid transporting 11A	protein_coding	0.87	5.76	0.00206442	0.0329931	0.32	0.026961
MGAT4A	ENSG00000071073	alpha-1,3-mannosyl-glycoprotein 4-beta-N-acetylglucosaminyltransferase A	protein_coding	0.87	5.85	2.68847e-07	1.63596e-05	0.62	1.53163e-07
ZNF697	ENSG00000143067	zinc finger protein 697	protein_coding	0.87	4.87	8.17106e-05	2.56593e-05	0.61	3.37147e-07
PLEKHH1	ENSG00000054690	pleckstrin homology, MyTH4 and FERM domain containing H1	protein_coding	0.88	6.48	0.00027035	0.000343955	0.47	0.000352934
CDC25A	ENSG00000164045	cell division cycle 25A	protein_coding	0.89	2.02	5.13116e-07	2.0163e-07	0.67	5.44629e-09
PSAT1	ENSG00000135069	phosphoserine aminotransferase 1	protein_coding	0.89	5.05	3.52554e-05	5.28358e-06	0.53	2.2138e-05
SLC36A1	ENSG00000123643	solute carrier family 36 member 1	protein_coding	0.89	5.78	0.00239774	0.00105439	0.39	0.00399208
RHPN1	ENSG00000158106	rhophilin Rho GTPase binding protein 1	protein_coding	0.89	4.08	0.000853369	0.00119295	0.5	9.55207e-05
SPDEF	ENSG00000124664	SAM pointed domain containing ETS transcription factor	protein_coding	0.9	9.26	0.00602287	1.23999e-05	0.54	1.21931e-05
CENPE	ENSG00000138778	centromere protein E	protein_coding	0.9	1.83	0.0019287	0.00112039	0.4	0.00305149
ZNF217	ENSG00000171940	zinc finger protein 217	protein_coding	0.91	7.02	4.68364e-07	3.86319e-06	0.62	1.94593e-07
TP53INP1	ENSG00000164938	tumor protein p53 inducible nuclear protein 1	protein_coding	0.94	7.06	1.9507e-07	3.12501e-06	0.66	1.07763e-08
C9orf152	ENSG00000188959	chromosome 9 open reading frame 152	protein_coding	0.94	6.13	1.89237e-05	4.75591e-06	0.61	3.62445e-07
PPM1H	ENSG00000111110	protein phosphatase, Mg2+/Mn2+ dependent 1H	protein_coding	0.96	7.25	6.81185e-08	4.58686e-07	0.69	1.85231e-09
ZNF652	ENSG00000198740	zinc finger protein 652	protein_coding	0.98	6.63	6.99421e-08	4.27225e-06	0.62	2.45614e-07
C1orf53	ENSG00000203724	chromosome 1 open reading frame 53	protein_coding	0.98	1.12	0.000108044	6.4725e-05	0.52	3.1525e-05
NEDD4L	ENSG00000049759	NEDD4 like E3 ubiquitin protein ligase	protein_coding	0.99	8.67	0.000190424	1.35633e-05	0.55	1.01733e-05
ELOVL7	ENSG00000164181	ELOVL fatty acid elongase 7	protein_coding	1	6.41	0.000216166	7.62747e-05	0.52	4.39969e-05
CTHRC1	ENSG00000164932	collagen triple helix repeat containing 1	protein_coding	1	1.89	0.0122475	0.00127185	0.4	0.00384397
MYB	ENSG00000118513	MYB proto-oncogene, transcription factor	protein_coding	1.04	3.24	1.09925e-05	0.000394797	0.48	0.000217954
FMO5	ENSG00000131781	flavin containing dimethylaniline monoxygenase 5	protein_coding	1.04	4.79	0.00131157	0.000718092	0.45	0.000621082
TUBB3	ENSG00000258947	tubulin beta 3 class III	protein_coding	1.04	-0.71	0.00440808	0.0167927	0.28	0.0630105
PLAC8L1	ENSG00000173261	PLAC8 like 1	protein_coding	1.05	-2.22	0.00209484	0.0248266	0.33	0.0218743
EZH2	ENSG00000106462	enhancer of zeste 2 polycomb repressive complex 2 subunit	protein_coding	1.06	2.26	6.37781e-06	8.46964e-06	0.66	1.28453e-08
FAM3B	ENSG00000183844	FAM3 metabolism regulating signaling molecule B	protein_coding	1.06	6.97	0.012011	0.0371865	0.21	0.204858
PLEKHS1	ENSG00000148735	pleckstrin homology domain containing S1	protein_coding	1.07	4.63	0.00136233	0.00181931	0.42	0.00187126
HIPK2	ENSG00000064393	homeodomain interacting protein kinase 2	protein_coding	1.09	7.87	2.74681e-07	4.27225e-06	0.58	1.97956e-06
FAM72D	ENSG00000215784	family with sequence similarity 72 member D	protein_coding	1.1	-2.93	0.0237248	0.00927675	0.35	0.0134624
SLC27A2	ENSG00000140284	solute carrier family 27 member 2	protein_coding	1.14	4	3.95632e-06	2.56593e-05	0.58	1.72008e-06
ZNF850	ENSG00000267041	zinc finger protein 850	protein_coding	1.17	2.42	3.87904e-10	6.29031e-08	0.73	1.09704e-10
PKIB	ENSG00000135549	cAMP-dependent protein kinase inhibitor beta	protein_coding	1.21	3.89	0.000304138	2.79808e-05	0.51	4.66114e-05
H2AJ	ENSG00000246705	H2A,J histone	protein_coding	1.21	8.7	2.90877e-05	0.00181931	0.42	0.00187126
FOXM1	ENSG00000111206	forkhead box M1	protein_coding	1.24	2.49	0.000252048	7.62747e-05	0.62	1.53163e-07
FMOD	ENSG00000122176	fibromodulin	protein_coding	1.25	8.34	0.00041601	0.00112039	0.42	0.00203407
COLEC12	ENSG00000158270	collectin subfamily member 12	protein_coding	1.26	6.39	1.2539e-06	2.6609e-07	0.6	5.24671e-07
SHOX2	ENSG00000168779	short stature homeobox 2	protein_coding	1.27	-1.66	0.00478195	0.012702	0.48	0.000186495
ALDH1A3	ENSG00000184254	aldehyde dehydrogenase 1 family member A3	protein_coding	1.3	8.79	2.62192e-06	1.15271e-06	0.54	1.21931e-05
ADM2	ENSG00000128165	adrenomedullin 2	protein_coding	1.3	5.02	3.10207e-07	3.12501e-06	0.62	1.41953e-07
CEACAM5	ENSG00000105388	CEA cell adhesion molecule 5	protein_coding	1.33	1.11	0.0306864	0.0401766	0.29	0.0568921
F5	ENSG00000198734	coagulation factor V	protein_coding	1.33	5.77	0.0208655	0.0200069	0.31	0.0330172
SLC4A4	ENSG00000080493	solute carrier family 4 member 4	protein_coding	1.36	8.56	0.000341079	8.9001e-05	0.48	0.000168411
TUBB2A	ENSG00000137267	tubulin beta 2A class IIa	protein_coding	1.38	4.88	1.0613e-06	4.65756e-05	0.54	1.55462e-05
ASPM	ENSG00000066279	assembly factor for spindle microtubules	protein_coding	1.4	1.6	0.000700876	0.000319697	0.52	2.97314e-05
SHCBP1	ENSG00000171241	SHC binding and spindle associated 1	protein_coding	1.41	0.77	0.000288932	0.000628978	0.44	0.000979719
SLC43A1	ENSG00000149150	solute carrier family 43 member 1	protein_coding	1.41	6.26	1.25283e-05	2.56593e-05	0.67	5.44629e-09
TLCD1	ENSG00000160606	TLC domain containing 1	protein_coding	1.45	3.97	2.35935e-07	4.77598e-08	0.66	1.67621e-08
CENPF	ENSG00000117724	centromere protein F	protein_coding	1.46	3.24	0.000156835	0.000240277	0.59	9.21446e-07
MCCC2	ENSG00000131844	methylcrotonoyl-CoA carboxylase 2	protein_coding	1.53	8.77	2.68847e-07	2.53463e-06	0.65	3.57365e-08
ABHD2	ENSG00000140526	abhydrolase domain containing 2, acylglycerol lipase	protein_coding	1.59	9.43	2.70214e-07	2.02182e-06	0.57	3.91296e-06
PCSK6	ENSG00000140479	proprotein convertase subtilisin/kexin type 6	protein_coding	1.68	3.98	2.33319e-08	1.7717e-07	0.69	1.6775e-09
RET	ENSG00000165731	ret proto-oncogene	protein_coding	1.82	4.7	6.99471e-06	0.000628978	0.42	0.00171864
RNF157	ENSG00000141576	ring finger protein 157	protein_coding	1.89	4.91	3.02838e-05	1.48971e-05	0.72	1.53008e-10
NETO2	ENSG00000171208	neuropilin and tolloid like 2	protein_coding	1.99	3	2.01988e-09	1.55833e-07	0.75	1.20057e-11
ONECUT2	ENSG00000119547	one cut homeobox 2	protein_coding	2.12	2.34	0.000151345	7.2264e-07	0.7	6.51314e-10
GDF15	ENSG00000130513	growth differentiation factor 15	protein_coding	2.21	8.53	2.90443e-07	7.70176e-06	0.59	8.60895e-07
TGM3	ENSG00000125780	transglutaminase 3	protein_coding	2.32	3.57	1.0098e-05	3.49769e-07	0.67	7.07481e-09
TBX10	ENSG00000167800	T-box transcription factor 10	protein_coding	2.47	-0.06	0.000176721	0.00401963	0.46	0.000480802
UGT1A1	ENSG00000241635	UDP glucuronosyltransferase family 1 member A1	protein_coding	2.94	-2.09	0.000835515	0.016909	0.36	0.010779
UGT1A3	ENSG00000243135	UDP glucuronosyltransferase family 1 member A3	protein_coding	3.52	1.37	0.000424192	0.00760779	0.34	0.0193046
KRT20	ENSG00000171431	keratin 20	protein_coding	3.63	-0.99	9.98166e-07	0.000223079	0.48	0.000191066
